# Supplementary material for: Catalytic asymmetric functionalization and dearomatization of thiophenes
Source: Royal Society of Chemistry journal article supplement (doi:10.1039/d4sc03530e), 2024-01-01
Supplement: d4sc03530e1.pdf [file d4sc03530e1.pdf]

# Supplementary Information

## Catalytic Asymmetric Functionalization and Dearomatization of Thiophenes

Zhengxing Zhao<sup>1</sup>, Yingxin Li<sup>1</sup>, Shiqi Jia<sup>2\*</sup>, Lei Peng<sup>1, 3</sup>, Zian Zhang<sup>1</sup>, Fengdi Wu<sup>1</sup>, Pengfei Wang<sup>1</sup>, Wenling Qin<sup>1\*</sup>, Yu Lan<sup>2,4</sup>, Hailong Yan<sup>1\*</sup>

<sup>1</sup>Chongqing Key Laboratory of Natural Product Synthesis and Drug Research, School of Pharmaceutical Sciences, Chongqing University, Chongqing 401331, P. R. China

<sup>2</sup>Green Catalysis Center, College of Chemistry, Zhengzhou University, Zhengzhou, 450001, P. R. China.

<sup>3</sup>Chongqing University FuLing Hospital, Chongqing University, Chongqing 408000, P. R. China.

<sup>4</sup>School of Chemistry and Chemical Engineering, Chongqing Key Laboratory of Theoretical and Computational Chemistry, Chongqing University, Chongqing, 400030, P. R. China.

\*Corresponding authors. E-mails: [jiashiqi17@zzu.edu.cn](mailto:jiashiqi17@zzu.edu.cn); [wenling.qin@cqu.edu.cn](mailto:wenling.qin@cqu.edu.cn); [yhl198151@cqu.edu.cn](mailto:yhl198151@cqu.edu.cn)

### Table of Contents

|       |                                                                                     |      |
|-------|-------------------------------------------------------------------------------------|------|
| I.    | General information .....                                                           | S2   |
| II.   | General procedure for the synthesis of the substrates .....                         | S2   |
| III.  | DFT Calculation .....                                                               | S6   |
| IV.   | Optimization of the reaction condition .....                                        | S18  |
| V.    | General procedure for asymmetric reaction .....                                     | S19  |
| VI.   | Experiments about other substituted VQMs.....                                       | S19  |
| VII.  | <sup>1</sup> H, <sup>13</sup> C NMR and HRMS data of compounds (1a-1am).....        | S20  |
| VIII. | <sup>1</sup> H, <sup>13</sup> C NMR and HRMS data of compounds (2a-2x, 3a-3t) ..... | S36  |
| IX.   | Rotational barriers of 2l, 3l.....                                                  | S65  |
| X.    | Pharmacological research .....                                                      | S68  |
| XI.   | Gram-scale preparation and transformations.....                                     | S69  |
| XII.  | Mechanistic studies.....                                                            | S75  |
| XIII. | <sup>1</sup> H and <sup>13</sup> C NMR spectra.....                                 | S81  |
| XIV.  | X-ray crystallographic information .....                                            | S181 |
|       | References.....                                                                     | S189 |



## I. General information

$^1\text{H}$  and  $^{13}\text{C}$  NMR spectra were recorded on Agilent 400MR DD2 (400 MHz) spectrometer and Agilent 600MR DD2 (600 MHz) spectrometer. Chemical shifts were reported in parts per million (ppm), and tetramethylsilane or the residual solvent peak was used as an internal reference:  $\text{CDCl}_3$  ( $^1\text{H}$  NMR tetramethylsilane  $\delta$  0.00,  $^{13}\text{C}$  NMR  $\delta$  77.00), data are reported as follows: chemical shift, multiplicity (s = singlet, d = doublet, t = triplet, q = quartet, m = multiplet, br = broad), coupling constants (Hz) and integration. Enantiomeric excesses (ee) were determined by HPLC analysis on Hitachi Chromaster using DAICEL CHIRALCEL AD-H, 4.6mm $\Phi$ ×250mm, DAICEL CHIRALCEL AS-H, 4.6mm $\Phi$ ×250mm, DAICEL CHIRALCEL OD-H, 4.6mm $\Phi$ ×250mm, DAICEL CHIRALCEL IA-H, 4.6mm $\Phi$ ×250mm, DAICEL CHIRALCEL IB-H, 4.6mm $\Phi$ ×250mm. High resolution mass spectra (HRMS) were performed on Bruker Solarix 7.0 T. X-ray crystallography analysis of single crystal was performed on an Agilent SuperNova-CCD X-Ray diffractometer. Optical rotations were measured on a Rudolph Autopol I polarimeter and are reported as follows:  $[\alpha]_D^{25}$  ( $c$  in g per 10 mL solvent). Unless otherwise stated, all reagents were purchased from commercial suppliers (MERYER, Adamas, J&K, Sigma-Aldrich, TCI, etc.) and used without further purification.

## II. General procedure for the synthesis of the substrates

### Method A: (1a-1u, 1x)

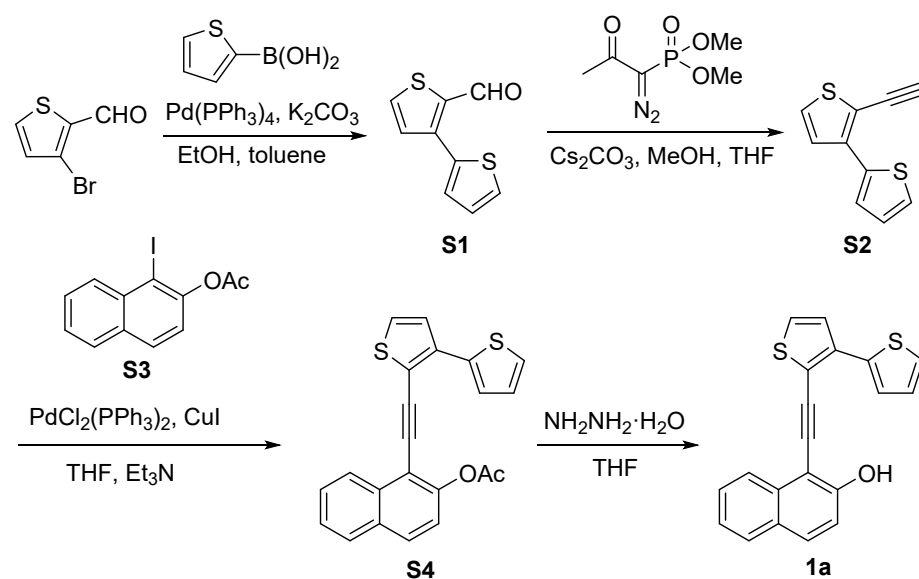

### [2,3'-bithiophene]-2'-carbaldehyde (S1)

To a stirring solution of 3-bromo-thiophene-2-carbaldehyde (3.82 g, 20 mmol, 1.0 equiv.),  $\text{Pd}(\text{PPh}_3)_4$  (462 mg, 0.4 mmol, 0.02 equiv.), and 2-thiopheneboronic acid (2.82 g, 22 mmol, 1.1 equiv.) in toluene (40 ml) under nitrogen was added sodium carbonate solution (1.0 M, 20 ml). The solution was heated under reflux for 8 h, then was extracted with EA three times. The combined organic layers were dried over  $\text{MgSO}_4$ . The solvent was evaporated to yield [2,3']bithiophenyl-2'-carbaldehyde as a colorless oil which was used directly in next step, without further purification.

## 2'-ethynyl-2,3'-bithiophene (S2)

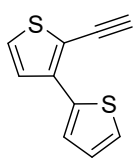

**S1** (1.94 g, 10 mmol, 1.0 equiv.) was dissolved in THF (20 ml) and MeOH (10 ml).  $\text{Cs}_2\text{CO}_3$  (276.4 mg, 20 mmol, 1.0 equiv.) was added. Bestmann-Ohira Reagent (288.2 mg, 1.1 mmol) was added dropwise. The resulting mixture was stirred at rt overnight and then concentrated. The residue was purified on silica gel with PE to give the corresponding substituted acetylene **S2**.

## 1-([2,3'-bithiophen]-2'-ylethynyl)naphthalen-2-yl acetate (S4)

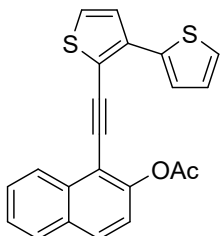

**S3** (1.25 g, 4 mmol, 1.0 equiv.),  $\text{PdCl}_2(\text{PPh}_3)_2$  (56 mg, 0.08 mmol, 0.02 equiv.) and  $\text{CuI}$  (38 mg, 0.2 mmol, 0.05 equiv.) were weighed and added into an oven dried flask, evacuated and backfilled with nitrogen (3 times).  $\text{Et}_3\text{N}$  (8 mL) and THF (8 mL) was injected into the flask. Then **S2** (836 mg, 4.4 mmol, 1.1 equiv.) was added. The resulting mixture kept stirring at room temperature for 24 h. Then the mixture was filtered through a pad of celite and washed with EA. Removal of solvent under reduced pressure, purified by column chromatography on silica gel (PE/EA = 20:1) to afford **S4** (1.12 g, 3.0 mmol, 75 % yield) as a yellow solid.

General procedure for the synthesis of **S3**: see reference 1.

## 1-([2,3'-bithiophen]-2'-ylethynyl)naphthalen-2-ol (1a)

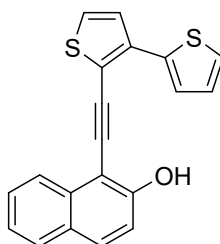

To a stirred solution of **S4** (1.12 g, 3.0 mmol, 1.0 equiv.) in THF (10 mL) was added hydrazine monohydrate (0.52 mL, 9 mmol, 3.0 equiv., 80%) slowly at rt. Then, the resulting solution was kept stirring until **S4** was consumed. Quenched with saturated aqueous  $\text{NH}_4\text{Cl}$ , extracted with EA, washed with brine, dried over  $\text{Na}_2\text{SO}_4$  and filtered, concentrated under reduced pressure and purified by column chromatography on silica gel (PE/EA = 20:1) to afford the desired product **1a** (945 mg, 2.85 mmol, 95% yield) as a yellow solid.

## Method B: (3a-3g, 3k, 3l, 3o, 3p)

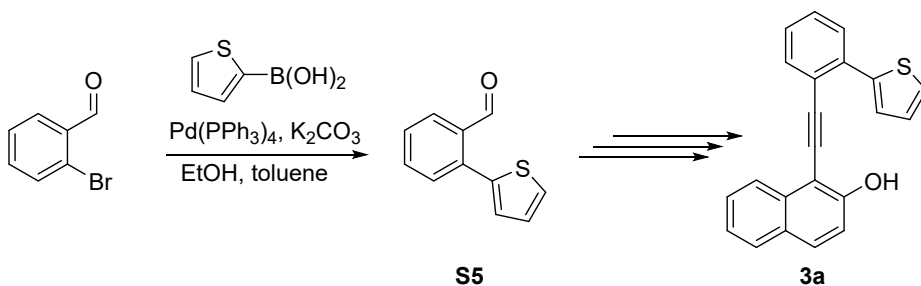

## 2-(thiophen-2-yl)benzaldehyde (S5)

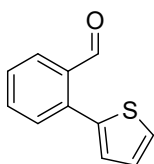

To a stirring solution of 2-thiophenylboronic acid (1.54 g, 12 mmol, 1.2 equiv.),  $\text{Pd}(\text{PPh}_3)_4$  (231 mg, 0.2 mmol, 0.02 equiv.), and 2-bromobenzaldehyde (1.85 g, 10 mmol, 1.0 equiv.) in toluene (20 ml) under nitrogen was added sodium carbonate solution (1.0 M, 10 ml). The solution was heated under reflux for 4 h, then was extracted with EA three times. The combined organic layers were dried over  $\text{MgSO}_4$ . The solvent was evaporated, the crude product was purified by silica gel.

Compound **3a** was prepared according to the general procedure as described for **1a**

### Method C: (3h-3j)

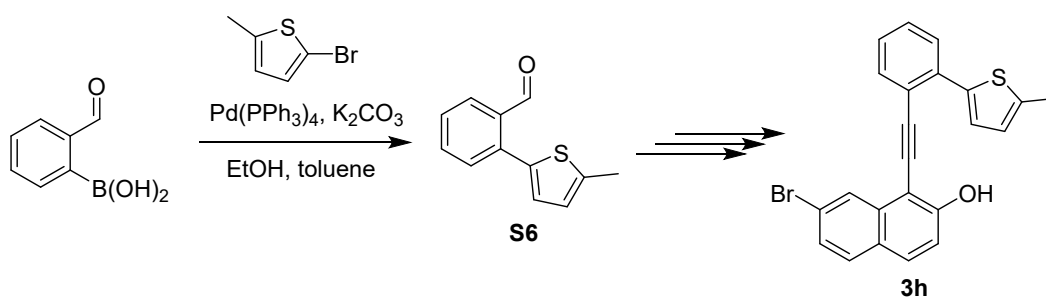

#### 2-(5-methylthiophen-2-yl)benzaldehyde (S6)

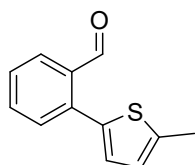

To a stirring solution of (2-formylphenyl)boronic acid (1.8 g, 12 mmol, 1.2 equiv.),  $\text{Pd(PPh}_3)_4$  (231 mg, 0.2 mmol, 0.02 equiv.), and 2-bromo-5-methylthiophene (1.7 g, 10 mmol, 1.0 equiv.) in toluene (20 ml) under nitrogen was added sodium carbonate solution (1.0 M, 10 ml). The solution was heated under reflux for 4 h, then was extracted with EA three times. The combined organic layers were dried over  $\text{MgSO}_4$ . The solvent was evaporated, the crude product was purified by silica gel.

Compound **3h** was prepared according to the general procedure as described for **1a**

### Method D: (8)

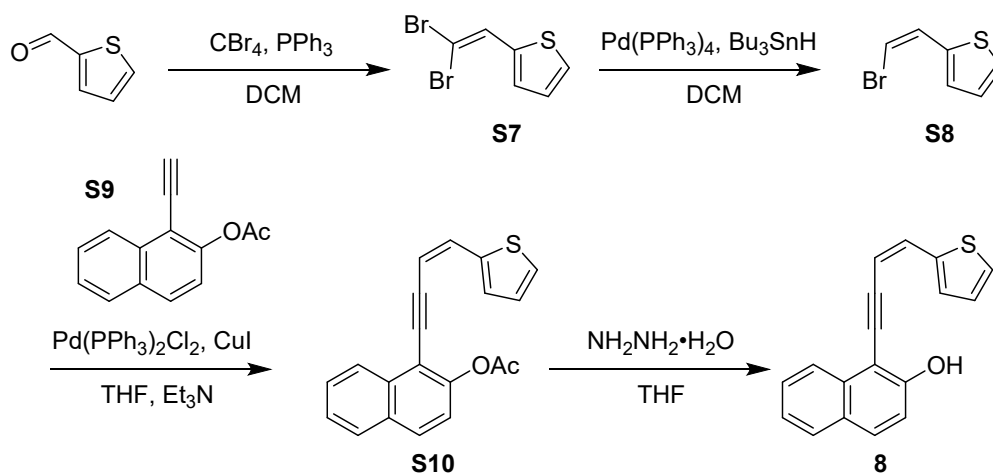

#### 2-(2,2-dibromovinyl)thiophene (S7)

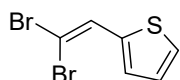

To an ice-cold stirred solution of  $\text{PPh}_3$  (15.8 g, 60 mmol, 3 equiv.) in DCM (60 mL),  $\text{CBr}_4$  (10 g, 30 mmol, 1.1 equiv.) in DCM (10 mL) was added. After 1 hour, 2-thienaldehyde (2.25 g, 20 mmol, 1.0 equiv.) and in DCM (20 mL) was added dropwise. After the reaction was complete, PE was added to the mixture. The suspended mixture was filtered to remove triphenylphosphine oxide. After evaporation of solvents, the crude product **S7** was used directly in next step, without further purification.

#### (Z)-2-(2-bromovinyl)thiophene (S8)

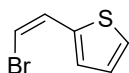

To a stirred solution of **S7** (900 mg, 3.37 mmol, 1.0 equiv.) and  $\text{Pd(PPh}_3)_4$  (128 mg, 0.111 mmol, 0.03 equiv.) in dried DCM (10 mL) was added *n*- $\text{Bu}_3\text{SnH}$  (1 mL, 3.7 mmol, 1.1 equiv.) dropwise, and the mixture

was stirred overnight. The mixture was hydrolyzed by the addition of aqueous potassium fluoride. After 90 min, the precipitated tin salts were filtered under vacuum and the residual solution was extracted with DCM. The organic layer was washed with brine and water, dried over sodium sulfate and concentrated. Purification of the residue by flash column chromatography on basic alumina and finely ground KF (90:10%, w/w) using PE as eluent furnished the product as a yellow oil. Yield; (445 mg, 70%).

### (Z)-1-(4-(thiophen-2-yl)but-3-en-1-yn-1-yl)naphthalen-2-yl acetate (S10)

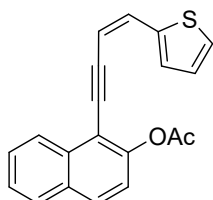

$\text{PdCl}_2(\text{PPh}_3)_2$  (70 mg, 0.1 mmol, 0.03 equiv.) and  $\text{CuI}$  (30 mg, 0.16 mmol, 0.05 equiv.) were weighed and added into an oven dried flask, evacuated and backfilled with nitrogen (3 times). **S8** (0.6 g, 3.2 mmol, 1.0 equiv.) in  $\text{Et}_3\text{N}$  (8 mL) was injected into the flask. The mixture was heated to 70 °C, then alkyne **S9** (882 mg, 4.2 mmol, 1.3 equiv.) in THF (8 mL) was added slowly. The resulting mixture kept stirring at 70 °C for 3 h. Then the mixture was filtered through a pad of celite and washed with EA. Removal of solvent under reduced pressure, purified by column chromatography on silica gel (PE/EA = 10:1) to afford **S10** (882 mg, 2.5 mmol, 78 % yield) as a yellow oil.

General procedure for the synthesis of **S9**: see reference 1.

Compound **8** was prepared according to the general procedure as described for **1a**

### Method E: (1v, 1w, 3m, 3n)

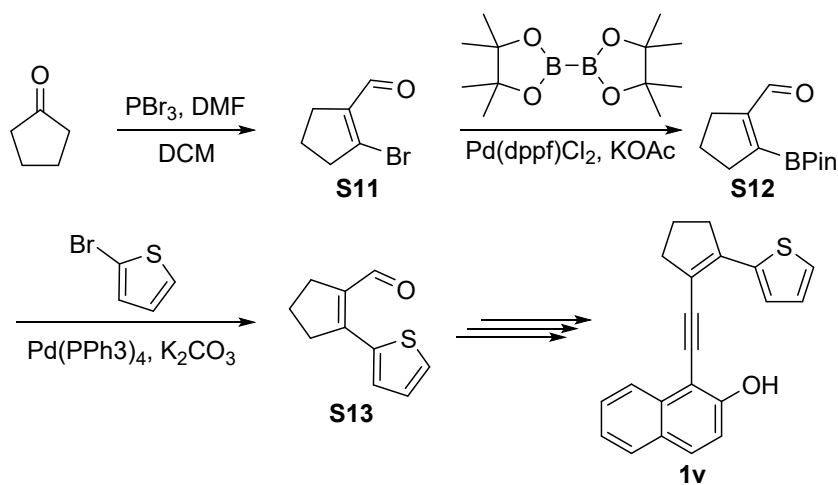

### 2-bromocyclopent-1-ene-1-carbaldehyde(S11)

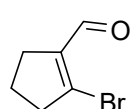

In a 500ml dry three-port bottle, DMF (615 mmol, 47.5 ml) and 300 ml DCM were added under a nitrogen atmosphere. After stirring at 0 °C for 10 minutes, phosphorus tribromide (532 mmol, 50.0 ml) was added. After stirring at 0 °C for 1 h, (205 mmol, 18.2 ml) was added dropwise. After 0.5 hours, turn off the cold trap. Stirring was continued for 8 hours after slowly rising to room temperature, then the reaction mixture was poured into a bath of ice, and completely quenched with  $\text{NaHCO}_3$ . Extract three times with DCM and combine the organic phases. Wash with water, saturated sodium chloride, dry over anhydrous sodium sulfate, and filter. After evaporation of solvents, the crude product **S11** was used directly in next step, without further purification.

### 2-(4,4,5,5-tetramethyl-1,3,2-dioxaborolan-2-yl)cyclopent-1-ene-1-carbaldehyde(S12)

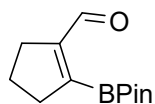

**S11** (1.86 g, 10 mmol), bis(pinacolato)diboron (3.0 g, 12 mmol), Pd(dppf)<sub>2</sub>Cl<sub>2</sub> (0.4 g, 0.5 mmol), and potassium acetate (2.9 g, 30 mmol) were dissolved in 30 mL of 1,4-dioxane. The reaction mixture was degassed with nitrogen and then heated to 85 °C. under nitrogen for 18 hours. The reaction mixture was filtered and an extraction was performed in ethyl acetate. The organic phase was washed with water and brine. The extract was dried over sodium sulfate, filtered, and concentrated. The resulting residue was purified by a silica gel column.

### 2-(thiophen-2-yl)cyclopent-1-ene-1-carbaldehyde(S13)

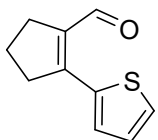

To a stirring solution of **S12** (1.33 g, 6 mmol, 1.2 equiv.), Pd(PPh)<sub>4</sub> (115 mg, 0.1 mmol, 0.02 equiv.), and 2-bromo-5-methylthiophene (1.7 g, 10 mmol, 1.0 equiv.) in toluene(20 ml) under nitrogen was added sodium bicarbonate solution (1.0 M, 10 ml). The solution was heated under reflux for 4 h, then was extracted with EA three times. The combined organic layers were dried over MgSO<sub>4</sub>. The solvent was evaporated, the crude product was purified by silica gel.

Compound **1v** was prepared according to the general procedure as described for **1a**

## III. DFT Calculation

### 1. Computational Methods.

All density functional theory (DFT) calculations were performed with the Gaussian 09<sup>2</sup> software package. Geometries were optimized in toluene with the SMD solvation model<sup>3</sup> using the B3-LYP-D3<sup>4</sup>functional and a basis set of 6-31G(d)<sup>5</sup>. Vibrational frequencies were computed at the same level to evaluate its zero-point vibrational energy and thermal corrections at 298 K, and to check whether each optimized structure is a transition state or not. The single-point energies and solvent effects in toluene were computed at the M06-2X level of theory with the 6-311+G(d,p)<sup>6</sup>basis set, using the solvent-phase optimized structures. Solvation energies were evaluated by a self-consistent reaction field (SCRF) using the SMD model.

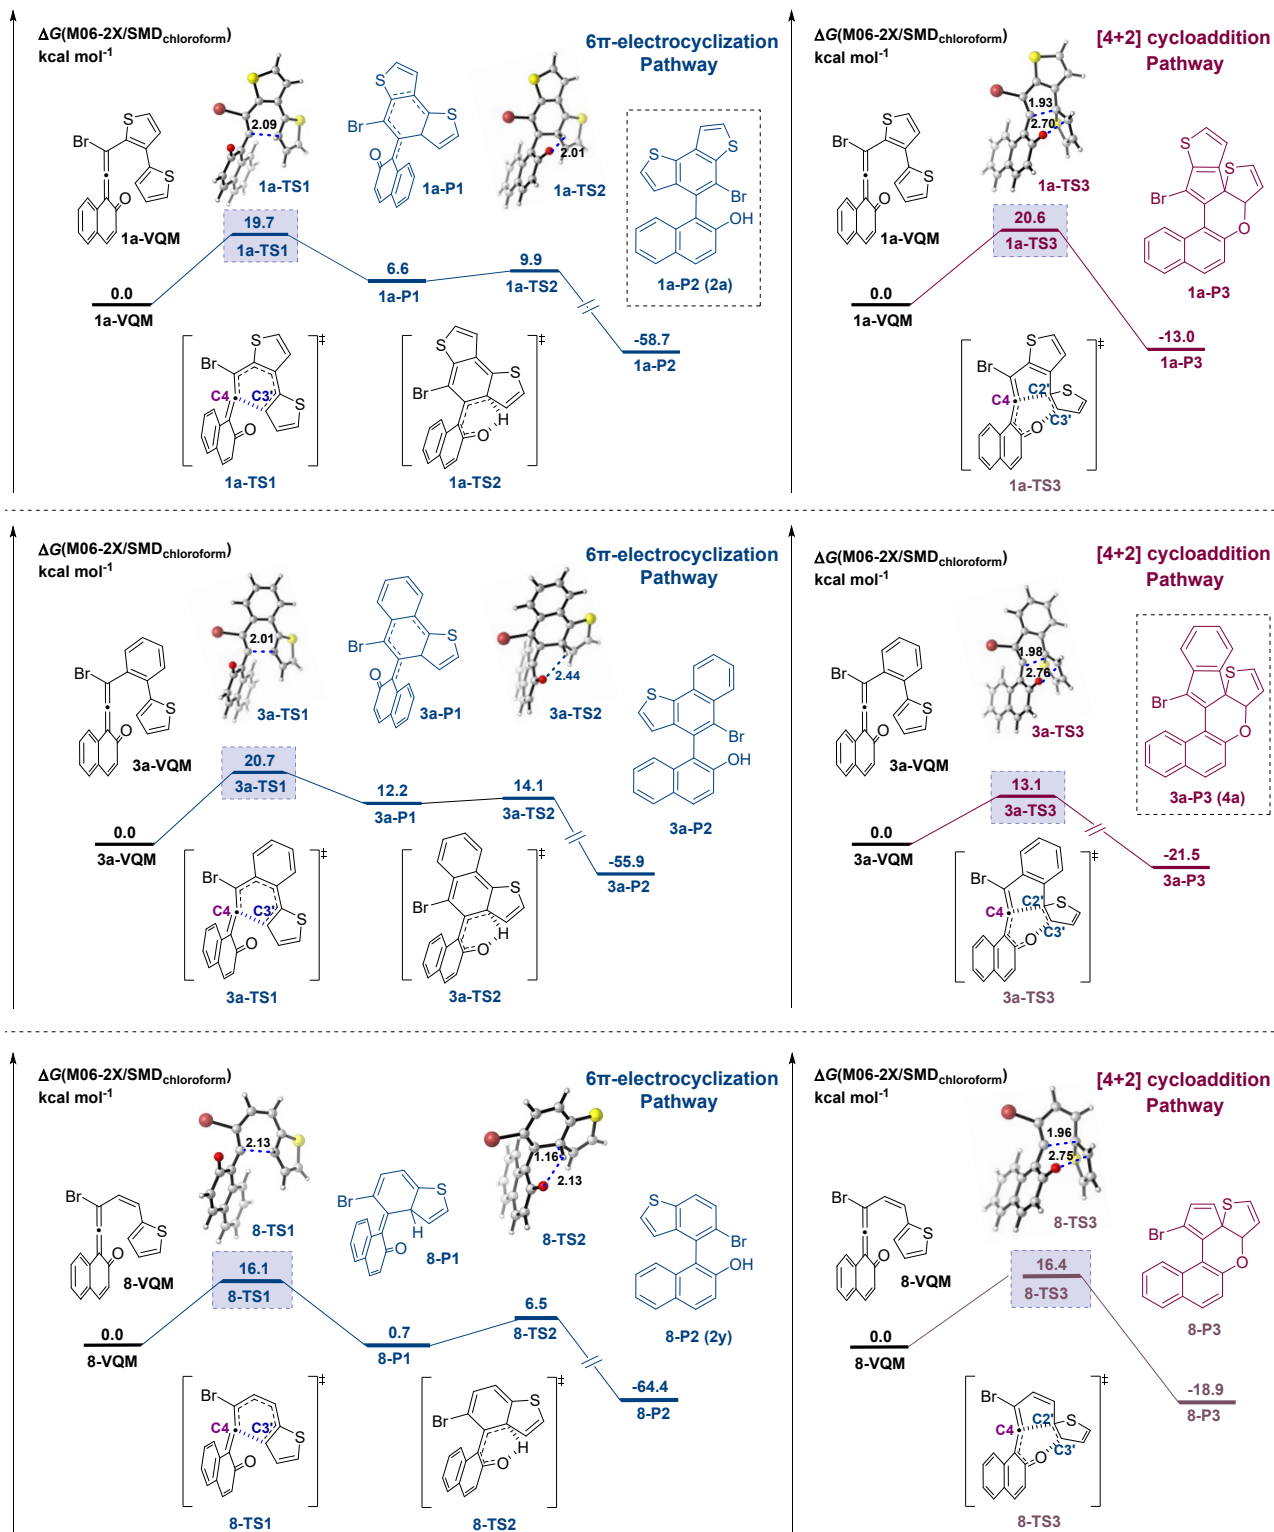



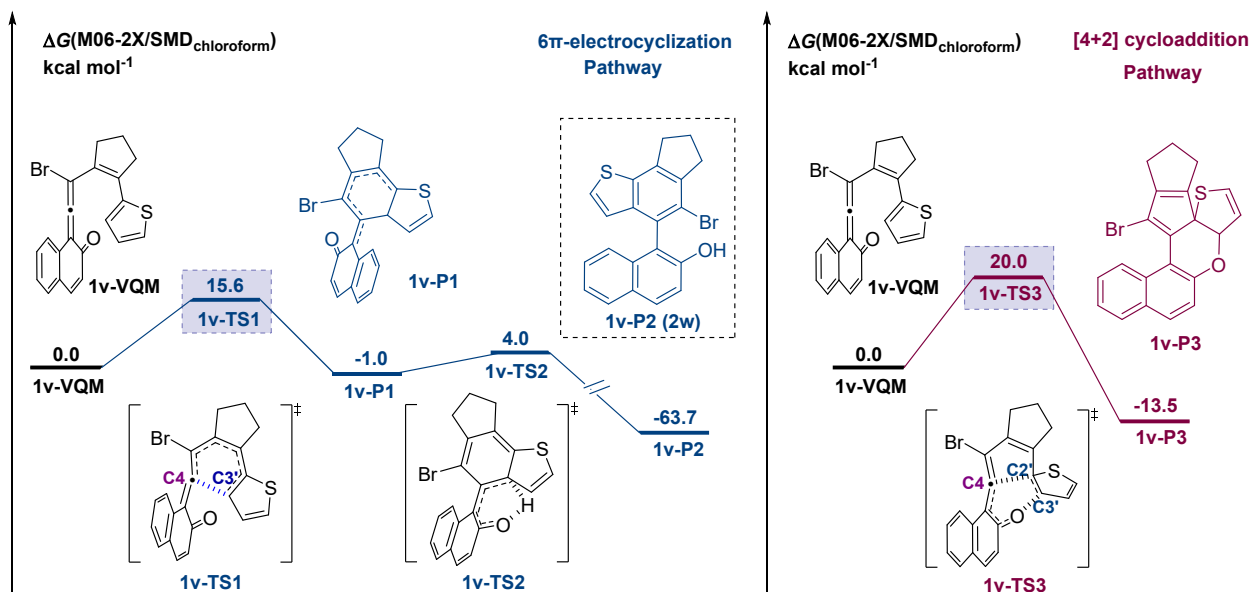

Supplementary Figure 1. DFT-computed Gibbs free energy profiles.

3a-VQM as the template substrate for DFT theoretical calculations to study the chirality transfer process

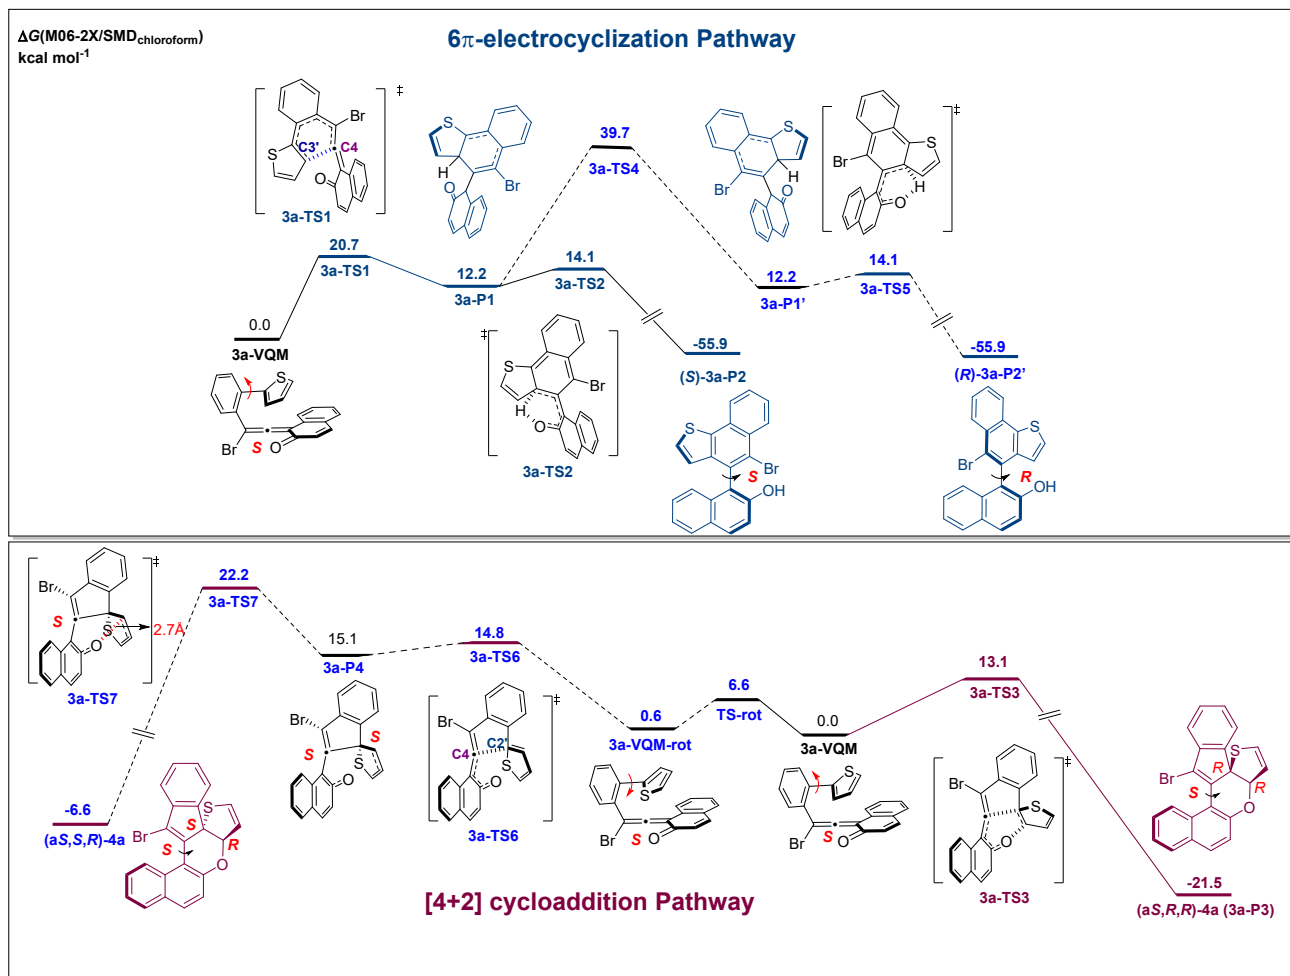

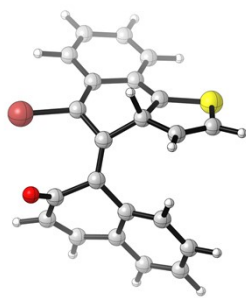

**3a-TS4**

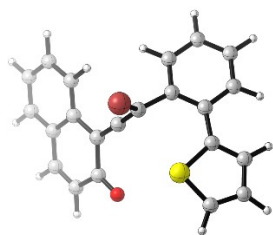

**TS-rot**

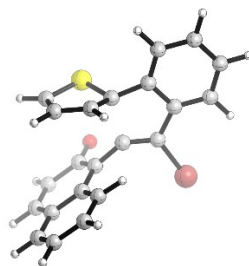

**3a-TS6**

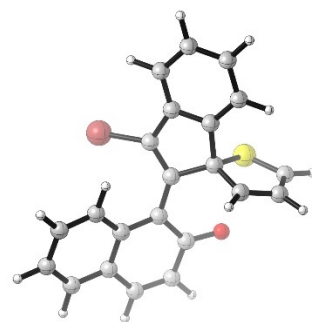

**3a-TS7**

## 2. B3-LYP-D3 and M06-2X calculated absolute energies, and free energies of all structures

**Supplementary Table 1. Energy datas**

| Geometry           | $E_{(\text{elec-B3-LYP-D3})}^1$ | $G_{(\text{corr-B3-LYP-D3})}^2$ | $H_{(\text{corr-B3-LYP-D3})}^3$ | $E_{(\text{solv-M06-2X})}^4$ | IF <sup>5</sup> |
|--------------------|---------------------------------|---------------------------------|---------------------------------|------------------------------|-----------------|
| <b>1a-VQM</b>      | -4211.73                        | 0.1941                          | 0.2674                          | -4214.35                     | -               |
| <b>1a-TS1</b>      | -4211.71                        | 0.1970                          | 0.2659                          | -4214.32                     | 377.99 <i>i</i> |
| <b>1a-TS2</b>      | -4211.72                        | 0.1990                          | 0.2653                          | -4214.33                     | 50.94 <i>i</i>  |
| <b>1a-TS3</b>      | -4211.7                         | 0.1968                          | 0.2657                          | -4214.32                     | 345.76 <i>i</i> |
| <b>1a-P1</b>       | -4211.73                        | 0.1993                          | 0.2674                          | -4214.34                     | -               |
| <b>1a-P2</b>       | -4211.82                        | 0.2010                          | 0.2698                          | -4214.45                     | -               |
| <b>1a-P3</b>       | -4211.75                        | 0.2024                          | 0.2695                          | -4214.37                     | -               |
| <b>3a-VQM</b>      | -3890.98                        | 0.2285                          | 0.3014                          | -3893.58                     | -               |
| <b>3a-TS1</b>      | -3890.95                        | 0.2302                          | 0.2998                          | -3893.55                     | 376.83 <i>i</i> |
| <b>3a-TS2</b>      | -3890.96                        | 0.2326                          | 0.2996                          | -3893.56                     | 46.44 <i>i</i>  |
| <b>3a-TS3</b>      | -3890.96                        | 0.2303                          | 0.2997                          | -3893.56                     | 353.32 <i>i</i> |
| <b>3a-P1</b>       | -3890.97                        | 0.2319                          | 0.3009                          | -3893.56                     | -               |
| <b>3a-P2</b>       | -3891.06                        | 0.2346                          | 0.3037                          | -3893.67                     | -               |
| <b>3a-P3</b>       | -3891.02                        | 0.2364                          | 0.3035                          | -3893.62                     | -               |
| <b>8-VQM</b>       | -3737.31                        | 0.1836                          | 0.2514                          | -3739.94                     | -               |
| <b>8-TS1</b>       | -3737.29                        | 0.1864                          | 0.2501                          | -3739.92                     | 331.54 <i>i</i> |
| <b>8-TS2</b>       | -3737.31                        | 0.1881                          | 0.2490                          | -3739.93                     | 83.13 <i>i</i>  |
| <b>8-TS3</b>       | -3737.29                        | 0.1865                          | 0.2496                          | -3739.92                     | 369.77 <i>i</i> |
| <b>8-P1</b>        | -3737.32                        | 0.1891                          | 0.2516                          | -3739.94                     | -               |
| <b>8-P2</b>        | -3737.41                        | 0.1908                          | 0.2539                          | -3740.05                     | -               |
| <b>8-P3</b>        | -3737.35                        | 0.1924                          | 0.2533                          | -3739.98                     | -               |
| <b>1v-VQM</b>      | -3854.06                        | 0.2429                          | 0.3176                          | -3856.66                     | -               |
| <b>1v-TS1</b>      | -3854.05                        | 0.2471                          | 0.3171                          | -3856.64                     | 316.61 <i>i</i> |
| <b>1v-TS2</b>      | -3854.07                        | 0.2497                          | 0.3162                          | -3856.66                     | 65.11 <i>i</i>  |
| <b>1v-TS3</b>      | -3854.04                        | 0.2472                          | 0.3168                          | -3856.63                     | 341.19 <i>i</i> |
| <b>1v-P1</b>       | -3854.07                        | 0.2500                          | 0.3185                          | -3856.67                     | -               |
| <b>1v-P2</b>       | -3854.16                        | 0.2520                          | 0.3209                          | -3856.77                     | -               |
| <b>1v-P3</b>       | -3854.09                        | 0.2528                          | 0.3206                          | -3856.69                     | -               |
| <b>3a-TS4</b>      | -3890.92                        | 0.2334                          | 0.3001                          | -3893.52                     | 28.40 <i>i</i>  |
| <b>3-VQM-rot</b>   | -3890.98                        | 0.2289                          | 0.3014                          | -3893.58                     | -               |
| <b>TS-rot</b>      | -3890.97                        | 0.2269                          | 0.3002                          | -3893.56                     | 47.37 <i>i</i>  |
| <b>3a-TS6</b>      | -3890.96                        | 0.2306                          | 0.2997                          | -3893.56                     | 333.20 <i>i</i> |
| <b>3a-P4</b>       | -3890.96                        | 0.2313                          | 0.3012                          | -3893.56                     | -               |
| <b>3a-TS7</b>      | -3890.95                        | 0.2328                          | 0.2997                          | -3893.55                     | 143.95 <i>i</i> |
| <b>(aS,S,R)-4a</b> | -3890.99                        | 0.2371                          | 0.3031                          | -3893.60                     | -               |

<sup>1</sup>The electronic energy calculated by B3-LYP-D3 in chloroform solvent. <sup>2</sup>The thermal correction to Gibbs free energy calculated by B3-LYP-D3 in chloroform solvent. <sup>3</sup>The thermal correction to enthalpy calculated by B3-LYP-D3 in chloroform solvent. <sup>4</sup>The electronic energy calculated by M06-2X in chloroform solvent. <sup>5</sup>The B3-LYP-D3 calculated imaginary frequencies for the transition states.

### Cartesian coordinates of the structures

**1a-P1**

|    |             |             |             |
|----|-------------|-------------|-------------|
| Br | -0.90934400 | -2.66746400 | -0.59784400 |
| O  | 0.85791600  | -2.27833700 | 1.99717100  |
| C  | 2.44048900  | 0.13210700  | -0.29020200 |
| C  | 1.39241300  | -0.58136900 | 0.39862200  |
| C  | 2.16899400  | 1.15894300  | -1.23083800 |
| H  | 1.13807900  | 1.39438900  | -1.47830000 |
| C  | -1.08397700 | -0.87685800 | 0.05618900  |
| C  | 0.04635500  | -0.11738900 | 0.35483500  |
| C  | 1.71122300  | -1.70861400 | 1.28645000  |
| C  | 3.19448000  | 1.84116400  | -1.87172100 |
| H  | 2.95241000  | 2.63178900  | -2.57745600 |
| C  | 3.80651100  | -0.24170200 | -0.09280300 |
| C  | 4.53564700  | 1.49632600  | -1.63705500 |
| H  | 5.33532500  | 2.02285900  | -2.15049600 |
| C  | 4.10512200  | -1.36228000 | 0.76491300  |
| H  | 5.15013800  | -1.64072200 | 0.89090100  |
| C  | 3.12871600  | -2.06731600 | 1.38766300  |
| H  | 3.35916000  | -2.91418400 | 2.02865100  |
| C  | 4.82794100  | 0.45132100  | -0.76891200 |
| H  | 5.86009700  | 0.14858200  | -0.60573800 |
| C  | -2.36992200 | -0.30482200 | -0.01188200 |
| C  | -2.62550200 | 1.10245200  | 0.12373400  |
| S  | -3.83188800 | -1.14190700 | -0.48315200 |
| C  | -3.99414000 | 1.44517600  | -0.18060100 |
| C  | -4.74154400 | 0.36313100  | -0.49761600 |
| H  | -4.38290800 | 2.45635100  | -0.13116600 |
| H  | -5.79649200 | 0.33698600  | -0.74249100 |
| C  | -1.55726800 | 1.91168600  | 0.45368000  |
| C  | -0.28362300 | 1.28857900  | 0.91705700  |
| S  | -1.46412800 | 3.64105400  | 0.40380500  |
| C  | 0.73598900  | 2.37486700  | 1.06347400  |
| C  | 0.24250000  | 3.60790400  | 0.88347900  |
| H  | 1.74993000  | 2.17485500  | 1.38117200  |
| H  | 0.76295400  | 4.55197500  | 0.99324600  |
| H  | -0.51116400 | 0.95888400  | 1.95760400  |

**1a-P2**

|    |             |             |             |
|----|-------------|-------------|-------------|
| Br | -0.16137500 | -2.65834400 | -0.11233700 |
| O  | 0.98684100  | -0.74487700 | 2.85560500  |
| C  | 2.40576800  | 0.30084400  | -0.40606300 |
| C  | 1.43146600  | 0.00562100  | 0.59963200  |
| C  | 2.04609300  | 0.74897200  | -1.70722000 |
| H  | 0.99610800  | 0.87079800  | -1.95346700 |
| C  | -0.86495500 | -0.88325300 | 0.01768300  |
| C  | -0.02565000 | 0.18222600  | 0.33484100  |
| C  | 1.84878700  | -0.43890600 | 1.84689600  |
| C  | 3.01086600  | 1.02154900  | -2.65423400 |
| H  | 2.71295900  | 1.36076400  | -3.64300200 |
| C  | 3.79850000  | 0.13503100  | -0.10485600 |
| C  | 4.38500200  | 0.86048900  | -2.35409500 |
| H  | 5.13365200  | 1.07789100  | -3.11098200 |
| C  | 4.17230000  | -0.32092900 | 1.18965600  |
| H  | 5.22814600  | -0.44513900 | 1.41734400  |
| C  | 3.22640100  | -0.60145000 | 2.14288600  |
| H  | 3.50079600  | -0.94999500 | 3.13378800  |
| C  | 4.76579300  | 0.42391200  | -1.10349100 |
| H  | 5.81789200  | 0.29244900  | -0.86057200 |
| C  | -2.23760800 | -0.68343100 | -0.22925000 |

|   |             |             |             |
|---|-------------|-------------|-------------|
| C | -2.82173700 | 0.60383000  | -0.17138900 |
| S | -3.43363000 | -1.89735200 | -0.64586500 |
| C | -4.22893500 | 0.57735800  | -0.46404500 |
| C | -4.68179600 | -0.67603500 | -0.73144800 |
| H | -4.86085000 | 1.45879800  | -0.47096600 |
| H | -5.69356300 | -0.97158500 | -0.98180500 |
| C | -1.97596600 | 1.68363800  | 0.14953500  |
| C | -0.60217500 | 1.48600800  | 0.40045600  |
| S | -2.41451500 | 3.37409800  | 0.29219700  |
| C | 0.07241900  | 2.72282200  | 0.70551300  |
| H | 0.07202400  | -0.60595200 | 2.55071700  |
| C | -0.75884000 | 3.79636700  | 0.68298900  |
| H | 1.13110000  | 2.78432200  | 0.92626700  |
| H | -0.50893300 | 4.83277700  | 0.87435400  |

**1a-P3**

|    |             |             |             |
|----|-------------|-------------|-------------|
| Br | 0.01305100  | -2.81807800 | -0.61359700 |
| O  | -0.18288000 | 2.34717500  | -1.55603100 |
| C  | -2.39561400 | -0.05340000 | 0.21748700  |
| C  | -1.18894100 | 0.53182800  | -0.29311400 |
| C  | -2.39323400 | -1.12005800 | 1.15502000  |
| H  | -1.44671400 | -1.49723200 | 1.52387100  |
| C  | 0.78077900  | -1.15308500 | -0.15944800 |
| C  | 0.15904400  | 0.05444500  | -0.04667600 |
| C  | -1.27164300 | 1.69733800  | -1.05924600 |
| C  | -3.57413600 | -1.65791700 | 1.62316700  |
| H  | -3.54541200 | -2.46952500 | 2.34553800  |
| C  | -3.66009000 | 0.48531800  | -0.19179100 |
| C  | -4.82108200 | -1.15666100 | 1.18095100  |
| H  | -5.74367700 | -1.59339300 | 1.55336000  |
| C  | -3.68496500 | 1.62071200  | -1.04914100 |
| H  | -4.64612600 | 2.02208500  | -1.36027200 |
| C  | -2.52317600 | 2.22890900  | -1.45473300 |
| H  | -2.52990000 | 3.11240600  | -2.08519100 |
| C  | -4.85794900 | -0.09870800 | 0.29837800  |
| H  | -5.80891300 | 0.31521100  | -0.02883000 |
| C  | 2.21576200  | -0.98018600 | -0.01675900 |
| C  | 2.51803200  | 0.35096700  | 0.15658900  |
| S  | 3.63120700  | -1.97390500 | -0.02153900 |
| C  | 3.90735800  | 0.60551600  | 0.29754000  |
| C  | 4.63496800  | -0.55588100 | 0.21803700  |
| H  | 4.35018700  | 1.58334900  | 0.44978000  |
| H  | 5.70919400  | -0.67601300 | 0.28251100  |
| C  | 1.22790400  | 1.12570200  | 0.15848000  |
| C  | 1.13770600  | 2.19869600  | -0.96246400 |
| S  | 1.02072500  | 2.04426000  | 1.78312300  |
| C  | 1.52185200  | 3.51885900  | -0.35158100 |
| H  | 1.78380500  | 1.89984700  | -1.79222000 |
| C  | 1.44930300  | 3.56080700  | 0.98306300  |
| H  | 1.74551600  | 4.37726500  | -0.97567900 |
| H  | 1.61614000  | 4.43643700  | 1.60336800  |

**1a-TS1**

|    |             |             |             |
|----|-------------|-------------|-------------|
| Br | -1.07838600 | -2.58774000 | -0.90883200 |
| O  | 0.76230700  | -2.39635100 | 1.93056800  |
| C  | 2.51230300  | 0.03246400  | -0.23978700 |
| C  | 1.40746100  | -0.67913700 | 0.38731600  |
| C  | 2.30383500  | 1.09485900  | -1.14304700 |
| H  | 1.28824700  | 1.38658800  | -1.39096700 |
| C  | -1.10175900 | -0.85384300 | -0.02527300 |
| C  | 0.10440600  | -0.30336500 | 0.20948000  |

|               |             |             |             |               |             |             |             |
|---------------|-------------|-------------|-------------|---------------|-------------|-------------|-------------|
| C             | 1.66864200  | -1.81110900 | 1.32236500  | H             | -0.47456100 | 1.11820700  | 1.68155600  |
| C             | 3.37737800  | 1.75985300  | -1.72605400 | C             | -0.27493500 | 3.76026800  | 0.32602900  |
| H             | 3.19022700  | 2.57973900  | -2.41443700 | H             | 1.48328900  | 2.57923200  | 0.67902600  |
| C             | 3.84922700  | -0.36768300 | 0.03853700  | H             | 0.10312000  | 4.77542800  | 0.30195300  |
| C             | 4.69391800  | 1.37269200  | -1.43713800 | <b>1a-TS3</b> |             |             |             |
| H             | 5.53072500  | 1.89072800  | -1.89718800 | Br            | -1.09113600 | -2.66920000 | 0.73076100  |
| C             | 4.08327500  | -1.48947100 | 0.92462600  | O             | 0.74445700  | 1.15817600  | 2.67339400  |
| H             | 5.11714700  | -1.77604800 | 1.10883600  | C             | 2.17787400  | -0.46991100 | -0.29465900 |
| C             | 3.07529200  | -2.17711600 | 1.51094200  | C             | 1.19713700  | 0.03448600  | 0.63911400  |
| H             | 3.26630800  | -3.01637600 | 2.17364100  | C             | 1.82222200  | -1.09601600 | -1.51209200 |
| C             | 4.92115300  | 0.31137100  | -0.56740500 | H             | 0.77221000  | -1.20500700 | -1.76346600 |
| H             | 5.93716000  | -0.00826700 | -0.34748500 | C             | -1.21328800 | -0.81821000 | 0.28877900  |
| C             | -2.38777900 | -0.23658600 | 0.12020900  | C             | -0.17308100 | 0.01453400  | 0.36557900  |
| C             | -2.60429500 | 1.14490700  | 0.31112100  | C             | 1.59656300  | 0.69166400  | 1.87901200  |
| S             | -3.90501400 | -1.05235400 | -0.19015600 | C             | 2.79452600  | -1.57284700 | -2.37886200 |
| C             | -3.98198100 | 1.51468100  | 0.16114500  | H             | 2.49725000  | -2.04870700 | -3.30972600 |
| C             | -4.78787400 | 0.44525800  | -0.08157300 | C             | 3.56385600  | -0.34321500 | 0.02644000  |
| H             | -4.34130900 | 2.53176900  | 0.27352300  | C             | 4.15857200  | -1.44901400 | -2.05943900 |
| H             | -5.86535900 | 0.43745000  | -0.19174100 | H             | 4.91524700  | -1.82843600 | -2.74056100 |
| C             | -1.48779800 | 1.98781000  | 0.54342000  | C             | 3.94533900  | 0.30589000  | 1.25645500  |
| C             | -0.29778200 | 1.51585400  | 1.14797100  | H             | 5.00853500  | 0.39265000  | 1.47383100  |
| S             | -1.29868300 | 3.61376700  | -0.05732700 | C             | 3.02972800  | 0.80849000  | 2.12500200  |
| C             | 0.73463600  | 2.53461600  | 1.15142000  | H             | 3.32725200  | 1.30182900  | 3.04623200  |
| H             | -0.38941600 | 0.82991400  | 1.98686900  | C             | 4.53168100  | -0.84217400 | -0.86833700 |
| C             | 0.34220800  | 3.68922200  | 0.55767000  | H             | 5.58374800  | -0.74215800 | -0.61042300 |
| H             | 1.70955300  | 2.39213500  | 1.60085700  | C             | -2.47506300 | -0.23109400 | -0.11727200 |
| H             | 0.91412600  | 4.59980800  | 0.42669700  | C             | -2.40102400 | 1.12337100  | -0.34148000 |
| <b>1a-TS2</b> |             |             |             | S             | -4.07732000 | -0.84000900 | -0.33324600 |
| Br            | -0.48534400 | -2.73197200 | -0.30544700 | C             | -3.65042400 | 1.70326100  | -0.70044900 |
| O             | 0.66152800  | -0.55643900 | 2.71301700  | C             | -4.64797300 | 0.76325800  | -0.73744900 |
| C             | 2.49603500  | 0.07393500  | -0.37801500 | H             | -3.80180000 | 2.75381200  | -0.92136300 |
| C             | 1.42067300  | -0.24834900 | 0.49298700  | H             | -5.69379600 | 0.90836300  | -0.97763600 |
| C             | 2.29905300  | 0.52400700  | -1.71381100 | C             | -1.03019200 | 1.65970800  | -0.15826600 |
| H             | 1.28404200  | 0.61492700  | -2.09352900 | C             | -0.65524900 | 2.59200800  | 0.86572000  |
| C             | -0.95418900 | -0.90029700 | -0.03760200 | S             | -0.06883100 | 2.03949900  | -1.64937400 |
| C             | 0.02996100  | 0.03066600  | 0.17704500  | C             | 0.50392300  | 3.30415500  | 0.55782500  |
| C             | 1.62445000  | -0.55757600 | 1.88646300  | H             | -1.19473600 | 2.65331000  | 1.80017700  |
| C             | 3.37415300  | 0.82778000  | -2.52850000 | C             | 0.96957900  | 3.04988300  | -0.72280900 |
| H             | 3.19881900  | 1.17782700  | -3.54300100 | H             | 1.02169200  | 3.95202000  | 1.25513800  |
| C             | 3.84283300  | -0.08194300 | 0.09352200  | H             | 1.86866700  | 3.45772100  | -1.17093300 |
| C             | 4.69757300  | 0.66887300  | -2.06224000 | <b>1a-VQM</b> |             |             |             |
| H             | 5.53593700  | 0.89590100  | -2.71511500 | Br            | -2.07639100 | -2.63315100 | 0.31407700  |
| C             | 4.04921400  | -0.52602000 | 1.44176500  | O             | 0.78102100  | -0.19647600 | 2.95937400  |
| H             | 5.07398900  | -0.66206800 | 1.78391900  | C             | 2.22566600  | -0.76685400 | -0.41725400 |
| C             | 3.00832200  | -0.75071100 | 2.29498600  | C             | 1.20043800  | -0.61958200 | 0.63348800  |
| H             | 3.17665600  | -1.05276600 | 3.32567900  | C             | 1.88982100  | -1.03515900 | -1.75208400 |
| C             | 4.91841300  | 0.21269000  | -0.77288100 | H             | 0.84483800  | -1.14434900 | -2.02677900 |
| H             | 5.93426900  | 0.08169700  | -0.40506700 | C             | -1.37960800 | -0.81117200 | 0.16405400  |
| C             | -2.32541100 | -0.53506600 | -0.13041400 | C             | -0.09811000 | -0.68406600 | 0.37761100  |
| C             | -2.78502300 | 0.80910800  | -0.02388700 | C             | 1.61174900  | -0.32783500 | 2.06094500  |
| S             | -3.64270300 | -1.60664500 | -0.49576800 | C             | 2.88045100  | -1.15668700 | -2.72358800 |
| C             | -4.19978900 | 0.92688000  | -0.26663500 | H             | 2.60054000  | -1.36220100 | -3.75298500 |
| C             | -4.78123900 | -0.27195500 | -0.51696000 | C             | 3.59046100  | -0.62298200 | -0.06456200 |
| H             | -4.74051000 | 1.86603600  | -0.23319700 | C             | 4.22997900  | -1.01313500 | -2.37762500 |
| H             | -5.82740400 | -0.47517700 | -0.71074600 | H             | 5.00196600  | -1.10684200 | -3.13609300 |
| C             | -1.83093700 | 1.79430500  | 0.22362200  | C             | 3.95728000  | -0.34395500 | 1.31321100  |
| C             | -0.45001600 | 1.41408500  | 0.57746300  | H             | 5.01849900  | -0.24531800 | 1.53352600  |
| S             | -2.01344900 | 3.50520100  | 0.08053600  | C             | 3.04892800  | -0.20298600 | 2.30477800  |
| C             | 0.41512200  | 2.62505100  | 0.51018900  | H             | 3.34432000  | 0.00770700  | 3.32821900  |

|   |             |             |             |
|---|-------------|-------------|-------------|
| C | 4.57828900  | -0.75019900 | -1.05628800 |
| H | 5.62302800  | -0.63867800 | -0.77677000 |
| C | -2.33632300 | 0.23994500  | -0.16839600 |
| C | -2.07061200 | 1.60172200  | -0.21716600 |
| S | -3.99995800 | -0.08895400 | -0.59178700 |
| C | -3.21283600 | 2.36643200  | -0.60600900 |
| C | -4.31863400 | 1.59614000  | -0.83796600 |
| H | -3.19505000 | 3.44687000  | -0.69609300 |
| H | -5.30980600 | 1.91855900  | -1.13193500 |
| C | -0.74620600 | 2.16055200  | 0.09893700  |
| C | -0.21465300 | 2.44608000  | 1.33195900  |
| S | 0.44399500  | 2.42327100  | -1.16426400 |
| C | 1.15003900  | 2.85867700  | 1.27440700  |
| H | -0.77104100 | 2.31316900  | 2.25243000  |
| C | 1.64437300  | 2.88550900  | -0.00256400 |
| H | 1.74101100  | 3.10972100  | 2.14840900  |
| H | 2.63964700  | 3.16171700  | -0.32816900 |

### 3a-P1

|    |             |             |             |
|----|-------------|-------------|-------------|
| Br | -0.64778500 | -2.73145000 | -0.69092000 |
| O  | 0.98665600  | -2.22254600 | 2.05822000  |
| C  | -2.41298700 | -0.54300500 | -0.03618700 |
| C  | 2.39349800  | 0.23147400  | -0.28709900 |
| C  | 1.40841100  | -0.53822300 | 0.41906900  |
| C  | -2.72578200 | 0.86483200  | 0.11299200  |
| C  | 2.04394200  | 1.23336400  | -1.23228400 |
| H  | 0.99694800  | 1.39512900  | -1.47170900 |
| C  | -1.03956100 | -0.98485500 | 0.01586300  |
| C  | 0.02072700  | -0.17955100 | 0.35639400  |
| C  | -4.05883600 | 1.32121300  | -0.10923300 |
| H  | -4.27884300 | 2.37959900  | 0.00198100  |
| C  | 1.80318600  | -1.60461200 | 1.34064400  |
| C  | 3.01427900  | 1.97923700  | -1.88572900 |
| H  | 2.71310300  | 2.74555300  | -2.59563400 |
| C  | 3.78647200  | -0.03693900 | -0.08868800 |
| C  | -3.49045300 | -1.41247600 | -0.34270800 |
| H  | -3.29738700 | -2.47307100 | -0.44341100 |
| C  | 4.37886000  | 1.73153700  | -1.65766700 |
| H  | 5.13564600  | 2.30832500  | -2.18213900 |
| C  | -4.77631900 | -0.94191300 | -0.51367600 |
| H  | -5.57540400 | -1.64377200 | -0.73388300 |
| C  | 4.16636700  | -1.10893200 | 0.79603900  |
| H  | 5.22861600  | -1.31121500 | 0.92403300  |
| C  | 3.24212300  | -1.85921600 | 1.44786100  |
| H  | 3.53404400  | -2.66753300 | 2.11329600  |
| C  | 4.75063600  | 0.72087500  | -0.77928600 |
| H  | 5.80324800  | 0.49804800  | -0.61710400 |
| C  | -5.06704900 | 0.43929200  | -0.40933800 |
| H  | -6.08312300 | 0.79446400  | -0.55120400 |
| C  | -1.68000700 | 1.73230500  | 0.45199500  |
| C  | -0.39626500 | 1.19213400  | 0.95521400  |
| S  | -1.65826600 | 3.45586700  | 0.34165000  |
| C  | 0.56561400  | 2.32478900  | 1.11621000  |
| H  | -0.62325100 | 0.83708400  | 1.98649400  |
| C  | 0.02159700  | 3.52958900  | 0.89005300  |
| H  | 1.57742600  | 2.17733100  | 1.46794400  |
| H  | 0.48971500  | 4.50177800  | 0.98873500  |

### 3a-P2

|    |             |             |             |
|----|-------------|-------------|-------------|
| Br | -0.04359500 | -2.70162600 | -0.16575600 |
|----|-------------|-------------|-------------|

|   |             |             |             |
|---|-------------|-------------|-------------|
| O | 1.01966900  | -0.84869500 | 2.82252700  |
| C | -2.26628500 | -0.83196400 | -0.24665700 |
| C | 2.38570400  | 0.32915600  | -0.41697500 |
| C | 1.42688300  | -0.03358200 | 0.58084800  |
| C | -2.85775600 | 0.47441100  | -0.15283400 |
| C | 2.00447000  | 0.78422500  | -1.70968900 |
| H | 0.94986500  | 0.85266100  | -1.95711400 |
| C | -0.85371300 | -0.96336900 | -0.00433500 |
| C | -0.03670600 | 0.10017500  | 0.32337100  |
| C | -4.24675100 | 0.62528500  | -0.39311000 |
| H | -4.69265500 | 1.61381100  | -0.32117400 |
| C | 1.86458600  | -0.48239500 | 1.81940000  |
| C | 2.95459700  | 1.13030800  | -2.64730600 |
| H | 2.64075000  | 1.47455900  | -3.62937800 |
| C | 3.78485300  | 0.22721000  | -0.11703700 |
| C | -3.10938100 | -1.92316900 | -0.58073900 |
| H | -2.68168900 | -2.91556300 | -0.65654400 |
| C | 4.33490200  | 1.03699600  | -2.34666500 |
| H | 5.07184400  | 1.31308900  | -3.09588000 |
| C | -4.45809000 | -1.74432900 | -0.80924500 |
| H | -5.07837100 | -2.59911700 | -1.06293500 |
| C | 4.18011000  | -0.23692100 | 1.16807300  |
| H | 5.24059900  | -0.31268400 | 1.39552000  |
| C | 3.24834300  | -0.58512300 | 2.11285700  |
| H | 3.53876800  | -0.94106100 | 3.09655400  |
| C | 4.73664500  | 0.59161200  | -1.10578300 |
| H | 5.79396800  | 0.51003700  | -0.86364000 |
| C | -5.03393800 | -0.45936800 | -0.71582400 |
| H | -6.09638900 | -0.32488700 | -0.89756400 |
| C | -2.00594000 | 1.56524200  | 0.18271500  |
| C | -0.63681500 | 1.39958300  | 0.41978000  |
| S | -2.47279400 | 3.24732800  | 0.35698900  |
| C | 0.02279300  | 2.63714700  | 0.74180300  |
| H | 0.09855400  | -0.75723700 | 2.51903000  |
| C | -0.82808700 | 3.69715000  | 0.74335400  |
| H | 1.08181800  | 2.71117100  | 0.95622800  |
| H | -0.59642800 | 4.73477800  | 0.95030200  |

### 3a-P3

|    |             |             |             |
|----|-------------|-------------|-------------|
| Br | -0.13288600 | -2.85006600 | -0.60517100 |
| O  | -0.03762500 | 2.23720900  | -1.61901700 |
| C  | 2.20213900  | -1.17587500 | -0.02155000 |
| C  | -2.37427000 | 0.02043100  | 0.22614100  |
| C  | -1.14257400 | 0.53398100  | -0.29635200 |
| C  | 2.55680500  | 0.17482300  | 0.15618400  |
| C  | -2.42460500 | -1.02769600 | 1.18337700  |
| H  | -1.49742700 | -1.44541300 | 1.55801700  |
| C  | 0.74516000  | -1.23547600 | -0.15811200 |
| C  | 0.18393100  | -0.00548900 | -0.05000200 |
| C  | 3.88486200  | 0.55325600  | 0.28721800  |
| H  | 4.15140900  | 1.59648500  | 0.43247300  |
| C  | -1.16482500 | 1.67725600  | -1.09679300 |
| C  | -3.63103800 | -1.49801000 | 1.65827000  |
| H  | -3.64395500 | -2.29735100 | 2.39465200  |
| C  | -3.60984700 | 0.61448300  | -0.19537500 |
| C  | 3.17885200  | -2.16831400 | -0.07962400 |
| H  | 2.90436400  | -3.20881100 | -0.22529500 |
| C  | -4.85141100 | -0.94376100 | 1.20413900  |
| H  | -5.79480600 | -1.32848200 | 1.58177800  |
| C  | 4.51874400  | -1.78594300 | 0.04929800  |

|               |             |             |             |               |             |             |             |
|---------------|-------------|-------------|-------------|---------------|-------------|-------------|-------------|
| H             | 5.29669000  | -2.54347900 | 0.00852300  | C             | -2.36603700 | -0.69324200 | -0.14921500 |
| C             | -3.57740500 | 1.72923300  | -1.07886300 | C             | 2.44798000  | 0.15733900  | -0.36308200 |
| H             | -4.51734800 | 2.17233600  | -1.39819700 | C             | 1.41606100  | -0.29079500 | 0.50402300  |
| C             | -2.38659300 | 2.26469800  | -1.50429700 | C             | -2.82874200 | 0.66340100  | 0.01451600  |
| H             | -2.34928400 | 3.12953300  | -2.15902300 | C             | 2.18635100  | 0.73167600  | -1.63896600 |
| C             | -4.83570300 | 0.09866200  | 0.30291600  | H             | 1.15575200  | 0.81893800  | -1.97436600 |
| H             | -5.76501200 | 0.55225800  | -0.03392000 | C             | -0.94239300 | -0.97937500 | -0.06595300 |
| C             | 4.87031300  | -0.44252400 | 0.22963800  | C             | 0.00800200  | -0.05671500 | 0.23247200  |
| H             | 5.91704100  | -0.16824900 | 0.32672100  | C             | -4.20711900 | 0.96344300  | -0.15193500 |
| C             | 1.29553200  | 1.00986000  | 0.15886800  | H             | -4.54578600 | 1.98808300  | -0.02549400 |
| C             | 1.25399700  | 2.09596600  | -0.95920600 | C             | 1.68132700  | -0.72908500 | 1.85313400  |
| S             | 1.11362200  | 1.92806800  | 1.79102300  | C             | 3.21952300  | 1.15884000  | -2.45343300 |
| C             | 1.61132500  | 3.41568200  | -0.33467600 | H             | 2.99501000  | 1.60122800  | -3.42103700 |
| H             | 1.93449600  | 1.80274300  | -1.76244500 | C             | 3.81571400  | 0.01965900  | 0.05143500  |
| C             | 1.52751100  | 3.45113800  | 0.99926000  | C             | -3.33139400 | -1.67879900 | -0.44041200 |
| H             | 1.83264500  | 4.27905600  | -0.95289100 | H             | -3.01661100 | -2.70754300 | -0.56382200 |
| H             | 1.67986600  | 4.32663200  | 1.62362300  | C             | 4.56278500  | 1.01044600  | -2.04657700 |
| <b>3a-TS1</b> |             |             |             | H             | 5.36862200  | 1.33466900  | -2.69941500 |
| Br            | -0.86371300 | -2.63387000 | -0.99725000 | C             | -4.67397300 | -1.36061500 | -0.56975000 |
| O             | 0.85042100  | -2.28268200 | 2.07951500  | H             | -5.38908500 | -2.14926000 | -0.78425900 |
| C             | -2.46284400 | -0.43809000 | 0.06326000  | C             | 4.08758900  | -0.53741000 | 1.34644100  |
| C             | 2.44238900  | 0.11069300  | -0.23778300 | H             | 5.12861000  | -0.65402100 | 1.64367500  |
| C             | 1.39420800  | -0.63165400 | 0.43438400  | C             | 3.08722900  | -0.89217200 | 2.20263000  |
| C             | -2.69604600 | 0.96115200  | 0.25713900  | H             | 3.30296000  | -1.28130000 | 3.19459500  |
| C             | 2.16103100  | 1.11777100  | -1.18584400 | C             | 4.84683600  | 0.44237700  | -0.81408300 |
| H             | 1.12625000  | 1.34119300  | -1.42749700 | H             | 5.87954700  | 0.32193400  | -0.49254600 |
| C             | -1.09251600 | -0.94184800 | -0.05836000 | C             | -5.11894600 | -0.03104800 | -0.43038600 |
| C             | 0.05975300  | -0.34143000 | 0.25356900  | H             | -6.17292200 | 0.20716700  | -0.53455600 |
| C             | -4.00791300 | 1.47162600  | 0.17887700  | C             | -1.86883500 | 1.65823900  | 0.29998800  |
| H             | -4.16487600 | 2.53746500  | 0.32064300  | C             | -0.50771400 | 1.30010100  | 0.72275900  |
| C             | 1.72047800  | -1.67973400 | 1.43074400  | S             | -2.05220100 | 3.36153200  | 0.10577400  |
| C             | 3.18563200  | 1.81390300  | -1.81578900 | C             | 0.34550000  | 2.52252800  | 0.70493700  |
| H             | 2.94290200  | 2.58805500  | -2.53900500 | H             | -0.57154300 | 0.97575800  | 1.80411400  |
| C             | 3.80517800  | -0.19291100 | 0.04441800  | C             | -0.34328000 | 3.64854000  | 0.46794300  |
| C             | -3.58572400 | -1.26997300 | -0.11759700 | H             | 1.40147000  | 2.49218300  | 0.93976400  |
| H             | -3.44109400 | -2.33558900 | -0.24843800 | H             | 0.02115200  | 4.66882200  | 0.45772000  |
| C             | 4.52725100  | 1.51795800  | -1.52836400 | <b>3a-TS3</b> |             |             |             |
| H             | 5.32615700  | 2.06088600  | -2.02561600 | Br            | 0.93973000  | 2.78848400  | 0.67185100  |
| C             | -4.87387300 | -0.75270800 | -0.14310100 | O             | -0.70583900 | -0.99902500 | 2.74767500  |
| H             | -5.71614400 | -1.42556600 | -0.27491400 | C             | 2.51732900  | 0.43385900  | -0.09861600 |
| C             | 4.11150600  | -1.24260000 | 0.99215400  | C             | -2.17320000 | 0.36828200  | -0.33831700 |
| H             | 5.16162400  | -1.45654200 | 1.18326900  | C             | -1.18022800 | -0.02641700 | 0.63828100  |
| C             | 3.14749200  | -1.94900200 | 1.63019600  | C             | 2.49663400  | -0.96006500 | -0.28888400 |
| H             | 3.39145200  | -2.73224500 | 2.34251900  | C             | -1.83230900 | 0.93735200  | -1.58637800 |
| C             | 4.82742000  | 0.51822000  | -0.60987700 | H             | -0.78577800 | 1.08243300  | -1.83378400 |
| H             | 5.86309600  | 0.27167500  | -0.38712500 | C             | 1.19431700  | 0.92891800  | 0.28391400  |
| C             | -5.08947700 | 0.62715200  | -0.01343000 | C             | 0.18273700  | 0.07458600  | 0.38584500  |
| H             | -6.09684100 | 1.03134000  | -0.04553100 | C             | 3.66102400  | -1.64496700 | -0.62406000 |
| C             | -1.56637100 | 1.80742600  | 0.51727200  | H             | 3.63701900  | -2.72128900 | -0.76857200 |
| C             | -0.42069400 | 1.36070700  | 1.21150800  | C             | -1.56448400 | -0.63091900 | 1.91393800  |
| S             | -1.33745900 | 3.40531500  | -0.12719200 | C             | -2.81554300 | 1.31517500  | -2.48990500 |
| C             | 0.60236400  | 2.39171500  | 1.26518500  | H             | -2.52900700 | 1.74950400  | -3.44414200 |
| H             | -0.55789000 | 0.68762800  | 2.05678000  | C             | -3.55424100 | 0.18998500  | -0.02574800 |
| C             | 0.24747500  | 3.52445800  | 0.61172900  | C             | 3.70519000  | 1.14851100  | -0.25074200 |
| H             | 1.54729900  | 2.26346700  | 1.77873600  | H             | 3.72128900  | 2.22338400  | -0.10216200 |
| H             | 0.82367600  | 4.43311000  | 0.48714000  | C             | -4.17536400 | 1.14373300  | -2.17771700 |
| <b>3a-TS2</b> |             |             |             | H             | -4.94101300 | 1.44631700  | -2.88668100 |
| Br            | -0.33742300 | -2.75868400 | -0.47031100 | C             | 4.87188800  | 0.45758200  | -0.59141800 |
| O             | 0.74863400  | -0.87640300 | 2.69565100  | H             | 5.80171700  | 1.00636000  | -0.71202900 |

|   |             |             |             |
|---|-------------|-------------|-------------|
| C | -3.92055600 | -0.40333600 | 1.23788700  |
| H | -4.98129700 | -0.53065500 | 1.44690800  |
| C | -2.99534800 | -0.80559100 | 2.14650300  |
| H | -3.28252200 | -1.25728700 | 3.09204200  |
| C | -4.53367500 | 0.58906800  | -0.95658100 |
| H | -5.58280000 | 0.45216500  | -0.70370700 |
| C | 4.85409000  | -0.92823400 | -0.77483500 |
| H | 5.76855500  | -1.45379200 | -1.03438000 |
| C | 1.15465500  | -1.57715300 | -0.09801200 |
| C | 0.81516700  | -2.46536100 | 0.96449600  |
| S | 0.21419700  | -2.04947200 | -1.56273500 |
| C | -0.31560000 | -3.23940600 | 0.69061400  |
| H | 1.34274200  | -2.44868800 | 1.90796100  |
| C | -0.78648900 | -3.06589100 | -0.60009400 |
| H | -0.80918200 | -3.87262300 | 1.41830100  |
| H | -1.66667100 | -3.52727900 | -1.03323500 |

**3a-VQM**

|    |             |             |             |
|----|-------------|-------------|-------------|
| Br | -1.61937400 | -2.85976300 | 0.32692000  |
| O  | 0.82228700  | -0.11586200 | 2.94303200  |
| C  | -2.47634300 | -0.06667000 | -0.17799000 |
| C  | 2.23703200  | -0.53727600 | -0.46504300 |
| C  | 1.22754900  | -0.46042100 | 0.60581600  |
| C  | -2.32479700 | 1.34529600  | -0.18743900 |
| C  | 1.88974900  | -0.78418700 | -1.80192500 |
| H  | 0.84435000  | -0.91444400 | -2.06491100 |
| C  | -1.31864100 | -0.92457900 | 0.15806500  |
| C  | -0.07186100 | -0.60261400 | 0.36798300  |
| C  | -3.41779600 | 2.15222400  | -0.52256200 |
| H  | -3.28391500 | 3.23010200  | -0.52413900 |
| C  | 1.64498600  | -0.18804400 | 2.02821200  |
| C  | 2.86930900  | -0.85894100 | -2.78862400 |
| H  | 2.58036800  | -1.04988500 | -3.81841800 |
| C  | 3.60287000  | -0.36166800 | -0.12889600 |
| C  | -3.72986500 | -0.60896400 | -0.49945400 |
| H  | -3.86679100 | -1.68341100 | -0.49666400 |
| C  | 4.21998900  | -0.68755900 | -2.45822800 |
| H  | 4.98334700  | -0.74590600 | -3.22893300 |
| C  | -4.80796100 | 0.21099000  | -0.82917300 |
| H  | -5.76463500 | -0.24082600 | -1.07542100 |
| C  | 3.97956100  | -0.10179800 | 1.24919500  |
| H  | 5.03986100  | 0.02786200  | 1.45790200  |
| C  | 3.08007900  | -0.01412300 | 2.25567300  |
| H  | 3.38269000  | 0.18344100  | 3.27970500  |
| C  | 4.57957300  | -0.44196400 | -1.13702500 |
| H  | 5.62484800  | -0.30798700 | -0.86926200 |
| C  | -4.65711800 | 1.59677400  | -0.84248000 |
| H  | -5.49335100 | 2.24141300  | -1.09742800 |
| C  | -1.03428800 | 1.98296700  | 0.15200100  |
| C  | -0.54520700 | 2.31038800  | 1.39328200  |
| S  | 0.11257300  | 2.42347800  | -1.10211000 |
| C  | 0.76409500  | 2.87195900  | 1.35020800  |
| H  | -1.08814300 | 2.10275300  | 2.30775100  |
| C  | 1.25554200  | 2.97998500  | 0.07582400  |
| H  | 1.32420100  | 3.16311200  | 2.23195100  |
| H  | 2.21705300  | 3.36610100  | -0.23934800 |

**8-P1**

|    |             |             |             |
|----|-------------|-------------|-------------|
| Br | -1.40923700 | -2.79076600 | -0.78594000 |
| O  | 0.24558500  | -2.40136400 | 1.81407100  |

|   |             |             |             |
|---|-------------|-------------|-------------|
| C | 1.80872000  | 0.24423800  | -0.21084400 |
| C | 0.75817400  | -0.57609300 | 0.35514200  |
| C | 1.53865900  | 1.29214500  | -1.12539400 |
| H | 0.51778800  | 1.46217800  | -1.45344000 |
| C | -1.68720300 | -1.01020900 | -0.11909100 |
| C | -0.59974000 | -0.19421400 | 0.24904000  |
| C | 1.09971800  | -1.74567800 | 1.18917300  |
| C | 2.55922500  | 2.07967100  | -1.64422700 |
| H | 2.31666800  | 2.88618700  | -2.33124300 |
| C | 3.17695100  | -0.05118400 | 0.07391100  |
| C | 3.89680000  | 1.81937000  | -1.31046200 |
| H | 4.69459700  | 2.42824900  | -1.72645500 |
| C | 3.49203100  | -1.21071200 | 0.87577900  |
| H | 4.54216100  | -1.42703700 | 1.06442900  |
| C | 2.52758500  | -2.02651500 | 1.36404000  |
| H | 2.76859600  | -2.90283800 | 1.95949600  |
| C | 4.19523600  | 0.74790800  | -0.47598200 |
| H | 5.23042900  | 0.50653300  | -0.24522000 |
| C | -2.97661800 | -0.50942400 | -0.31798500 |
| C | -3.30057600 | 0.86185200  | -0.21544200 |
| C | -2.32984100 | 1.72402000  | 0.21959500  |
| C | -1.05838900 | 1.18155900  | 0.79065700  |
| S | -2.35068900 | 3.46517600  | 0.20759200  |
| C | -0.13257100 | 2.33195400  | 1.03955200  |
| H | -1.35376100 | 0.82252800  | 1.80412000  |
| C | -0.69279900 | 3.53180700  | 0.82903300  |
| H | 0.85865000  | 2.19899400  | 1.45050500  |
| H | -0.24507500 | 4.50455500  | 0.99710000  |
| H | -3.73994200 | -1.18368900 | -0.69092600 |
| H | -4.27265200 | 1.20627700  | -0.55347400 |

**8-P2**

|    |             |             |             |
|----|-------------|-------------|-------------|
| Br | -0.13882600 | 2.88250800  | -0.65721900 |
| O  | -0.38334100 | 1.22755000  | 2.61592000  |
| C  | -1.69121200 | -0.76197200 | -0.22661700 |
| C  | -0.77455600 | -0.00592700 | 0.57123800  |
| C  | -1.33292800 | -1.30325000 | -1.49247600 |
| H  | -0.33064300 | -1.13619500 | -1.87412600 |
| C  | 1.08445800  | 1.42381600  | -0.41409700 |
| C  | 0.63213700  | 0.21777000  | 0.12885600  |
| C  | -1.19194700 | 0.50315600  | 1.79386900  |
| C  | -2.24042500 | -2.02889500 | -2.23532500 |
| H  | -1.94505100 | -2.43173600 | -3.20066100 |
| C  | -3.02465400 | -0.98283800 | 0.25415000  |
| C  | -3.55375700 | -2.25158900 | -1.75596700 |
| H  | -4.25797300 | -2.82511100 | -2.35246300 |
| C  | -3.40106400 | -0.43805500 | 1.51294400  |
| H  | -4.41213700 | -0.60517700 | 1.87597900  |
| C  | -2.51211900 | 0.28743400  | 2.26495800  |
| H  | -2.78797500 | 0.70666300  | 3.22760300  |
| C  | -3.93366900 | -1.73534800 | -0.53588800 |
| H  | -4.94099300 | -1.89485400 | -0.15771500 |
| C  | 2.41809000  | 1.62768800  | -0.81222500 |
| C  | 3.35025700  | 0.60775700  | -0.67880800 |
| C  | 2.92883400  | -0.61289000 | -0.14316700 |
| C  | 1.58820500  | -0.82255000 | 0.26408200  |
| S  | 3.90475200  | -2.04826600 | 0.12604300  |
| C  | 1.38377800  | -2.15092100 | 0.78483000  |
| H  | 0.49982300  | 1.30623400  | 2.21263200  |
| C  | 2.51569800  | -2.90130100 | 0.76898200  |



|   |            |             |             |
|---|------------|-------------|-------------|
| H | 0.42767800 | -2.51013500 | 1.14515100  |
| H | 2.63144900 | -3.92586000 | 1.10134700  |
| H | 2.71543100 | 2.58401900  | -1.22722300 |
| H | 4.37926700 | 0.76373200  | -0.98795300 |

**8-P3**

|    |             |             |             |
|----|-------------|-------------|-------------|
| Br | 1.12324600  | 2.83405400  | -0.57095100 |
| O  | -1.62697200 | -1.57306800 | -1.48482400 |
| C  | 1.60250200  | -0.82741300 | 0.19640200  |
| C  | 0.25919100  | -0.63439400 | -0.26990000 |
| C  | 2.22849000  | 0.05765400  | 1.11382500  |
| H  | 1.66710900  | 0.89902400  | 1.50231200  |
| C  | -0.43463500 | 1.86698800  | -0.09620500 |
| C  | -0.57704100 | 0.52014900  | 0.00135200  |
| C  | -0.34876100 | -1.64282900 | -1.02182700 |
| C  | 3.52435300  | -0.15561100 | 1.53571400  |
| H  | 3.97969500  | 0.53455200  | 2.24110300  |
| C  | 2.33220000  | -1.98506300 | -0.23210100 |
| C  | 4.26207500  | -1.26864300 | 1.06836600  |
| H  | 5.28494800  | -1.42016200 | 1.40221400  |
| C  | 1.68646000  | -2.94251500 | -1.06346600 |
| H  | 2.24386000  | -3.81828300 | -1.38594400 |
| C  | 0.37360700  | -2.79017500 | -1.43268200 |
| H  | -0.13737000 | -3.52581900 | -2.04571800 |
| C  | 3.66929300  | -2.16886600 | 0.20913800  |
| H  | 4.21396300  | -3.04508800 | -0.13521400 |
| C  | -1.72237300 | 2.55155000  | 0.06975300  |
| C  | -2.68727200 | 1.62731400  | 0.23100000  |
| C  | -2.05558800 | 0.25827600  | 0.20874900  |
| C  | -2.60490600 | -0.65579600 | -0.91781500 |
| S  | -2.43554300 | -0.61992000 | 1.82445300  |
| C  | -3.71029000 | -1.48562400 | -0.32190500 |
| H  | -2.92954000 | -0.03234200 | -1.75629400 |
| C  | -3.68473900 | -1.57184000 | 1.01239700  |
| H  | -4.39779700 | -2.03673300 | -0.95439900 |
| H  | -4.34545700 | -2.17697700 | 1.62601700  |
| H  | -1.83667900 | 3.62869200  | 0.04652100  |
| H  | -3.74727200 | 1.78554700  | 0.38526500  |

**8-TS1**

|    |             |             |             |
|----|-------------|-------------|-------------|
| Br | -1.76701800 | -2.61590800 | -0.95613000 |
| O  | 0.15650600  | -2.51323500 | 1.80875000  |
| C  | 1.87937100  | 0.05200700  | -0.22709100 |
| C  | 0.77911100  | -0.70763800 | 0.35773300  |
| C  | 1.66042800  | 1.13202300  | -1.10503600 |
| H  | 0.64289700  | 1.40185200  | -1.36856800 |
| C  | -1.74340400 | -0.90064500 | -0.02387200 |
| C  | -0.52420900 | -0.35884300 | 0.17469500  |
| C  | 1.05672300  | -1.87707300 | 1.24784100  |
| C  | 2.72746000  | 1.84264600  | -1.64592300 |
| H  | 2.53186800  | 2.67578100  | -2.31569900 |
| C  | 3.21974500  | -0.32240600 | 0.06612000  |
| C  | 4.04708300  | 1.48369900  | -1.33846900 |
| H  | 4.87898800  | 2.03708400  | -1.76503900 |
| C  | 3.46767000  | -1.47026000 | 0.91594600  |
| H  | 4.50532200  | -1.73434400 | 1.11172900  |
| C  | 2.46937700  | -2.21066000 | 1.45118800  |
| H  | 2.67127800  | -3.07073400 | 2.08316100  |
| C  | 4.28507700  | 0.40290600  | -0.49560400 |
| H  | 5.30473000  | 0.10346500  | -0.26472200 |
| C  | -3.03722700 | -0.30635400 | 0.11579700  |

|   |             |             |             |
|---|-------------|-------------|-------------|
| C | -3.25502200 | 1.04437800  | 0.27819300  |
| C | -2.17548400 | 1.91784100  | 0.51863600  |
| C | -0.96324400 | 1.49830600  | 1.12188900  |
| S | -2.05706900 | 3.56642700  | -0.05860400 |
| C | 0.02519800  | 2.55432500  | 1.12783600  |
| H | -1.01840400 | 0.79304800  | 1.94626500  |
| C | -0.41685400 | 3.69635400  | 0.54032500  |
| H | 1.00602700  | 2.45163800  | 1.57518500  |
| H | 0.12185400  | 4.62746100  | 0.41129000  |
| H | -3.89309100 | -0.94421400 | -0.07632100 |
| H | -4.25558000 | 1.43513400  | 0.11373600  |

**8-TS2**

|    |             |             |             |
|----|-------------|-------------|-------------|
| Br | 0.35634200  | 3.02070300  | -0.59300100 |
| O  | 0.09070200  | 0.74458300  | 2.55327800  |
| C  | -1.85073900 | -0.46527500 | -0.28025400 |
| C  | -0.80996500 | 0.17721200  | 0.44348200  |
| C  | -1.68586600 | -0.93699900 | -1.61236600 |
| H  | -0.72678000 | -0.79522200 | -2.10527500 |
| C  | 1.28405700  | 1.37084300  | -0.32303200 |
| C  | 0.56884100  | 0.23322300  | -0.00251200 |
| C  | -0.93486600 | 0.49272400  | 1.84480400  |
| C  | -2.72715200 | -1.55183200 | -2.28247900 |
| H  | -2.57636600 | -1.91265800 | -3.29706100 |
| C  | -3.13365000 | -0.62158500 | 0.34324000  |
| C  | -3.99069400 | -1.69752700 | -1.66855500 |
| H  | -4.80740400 | -2.16742500 | -2.20961500 |
| C  | -3.30282500 | -0.16067600 | 1.69065500  |
| H  | -4.28627200 | -0.26296700 | 2.14644200  |
| C  | -2.26807200 | 0.36413100  | 2.40943600  |
| H  | -2.39549800 | 0.67247200  | 3.44379800  |
| C  | -4.18422500 | -1.22925200 | -0.37963800 |
| H  | -5.15510900 | -1.33247300 | 0.10072900  |
| C  | 2.68142800  | 1.36691200  | -0.53826200 |
| C  | 3.45115700  | 0.21065000  | -0.41681300 |
| C  | 2.81980200  | -0.96306100 | -0.03242700 |
| C  | 1.41303200  | -0.94721600 | 0.40240600  |
| S  | 3.45718500  | -2.57299500 | -0.07970300 |
| C  | 0.90986300  | -2.34295100 | 0.49035400  |
| H  | 1.40972700  | -0.54895700 | 1.49089100  |
| C  | 1.87500200  | -3.26104300 | 0.31901100  |
| H  | -0.11752100 | -2.57280000 | 0.74172700  |
| H  | 1.78434200  | -4.33882200 | 0.38709600  |
| H  | 3.16426100  | 2.28491600  | -0.85569400 |
| H  | 4.50330300  | 0.23089800  | -0.68127900 |

**8-TS3**

|    |             |             |             |
|----|-------------|-------------|-------------|
| Br | -2.19049700 | -2.36497800 | 0.44052800  |
| O  | -0.16348100 | 1.23843900  | 2.56735400  |
| C  | 1.50889900  | -0.63352500 | -0.12339600 |
| C  | 0.45958800  | 0.00927500  | 0.63834000  |
| C  | 1.27527500  | -1.25180700 | -1.37308700 |
| H  | 0.27195700  | -1.24532100 | -1.78660700 |
| H  | -1.96890300 | -0.53441200 | -0.07610500 |
| C  | -0.83937700 | 0.12714200  | 0.15367400  |
| C  | 0.73670200  | 0.65461800  | 1.92087800  |
| C  | 2.30646600  | -1.86814800 | -2.06748900 |
| H  | 2.10277800  | -2.33677700 | -3.02683900 |
| C  | 2.83168600  | -0.65972700 | 0.41215200  |
| C  | 3.60803600  | -1.89535300 | -1.53668600 |
| H  | 4.41058900  | -2.38345300 | -2.08263700 |

|   |             |             |             |
|---|-------------|-------------|-------------|
| C | 3.09135100  | -0.02228000 | 1.68044900  |
| H | 4.11060900  | -0.05298300 | 2.06138700  |
| C | 2.11913600  | 0.60861000  | 2.38796400  |
| H | 2.32705600  | 1.09155400  | 3.33886400  |
| C | 3.86021500  | -1.29779300 | -0.30935000 |
| H | 4.86305600  | -1.31282500 | 0.11165600  |
| C | -3.08004400 | 0.17076300  | -0.71439300 |
| C | -2.79134200 | 1.45456000  | -0.97321700 |
| C | -1.41407000 | 1.85224500  | -0.58050200 |
| C | -1.09835700 | 2.76332400  | 0.47342700  |
| S | -0.18072300 | 2.04045000  | -1.88695600 |
| C | 0.17906400  | 3.31620800  | 0.35485100  |
| H | -1.76499600 | 2.91341200  | 1.31116200  |
| C | 0.81191000  | 2.96159700  | -0.82487300 |
| H | 0.65287000  | 3.91962200  | 1.11996700  |
| H | 1.81526400  | 3.23949500  | -1.12707400 |
| H | -4.02753000 | -0.31372400 | -0.91850400 |
| H | -3.47224500 | 2.16872900  | -1.42320300 |

### 8-VQM

|    |             |             |             |
|----|-------------|-------------|-------------|
| Br | -3.29865000 | -1.61254700 | 0.11407700  |
| O  | -0.20248000 | 0.46620000  | 2.84428300  |
| C  | 1.42392100  | -1.09312700 | -0.11113200 |
| C  | 0.36245900  | -0.49032200 | 0.71715000  |
| C  | 1.18161100  | -1.54975900 | -1.41472100 |
| H  | 0.18181800  | -1.46712600 | -1.83048200 |
| C  | -2.08365900 | -0.10330700 | -0.16639800 |
| C  | -0.86098700 | -0.27026600 | 0.25659600  |
| C  | 0.66449800  | -0.03131900 | 2.12573000  |
| C  | 2.20855200  | -2.10099400 | -2.17695200 |
| H  | 2.00169300  | -2.44724900 | -3.18566900 |
| C  | 2.72948100  | -1.20541500 | 0.42820000  |
| C  | 3.50142300  | -2.20721400 | -1.64873500 |
| H  | 4.30210000  | -2.63605800 | -2.24446900 |
| C  | 2.99546500  | -0.74557000 | 1.78027400  |
| H  | 4.01287100  | -0.85506300 | 2.15055700  |
| C  | 2.04673900  | -0.20081600 | 2.57512400  |
| H  | 2.26705700  | 0.13434600  | 3.58428400  |
| C  | 3.75527200  | -1.76308000 | -0.35479500 |
| H  | 4.75445000  | -1.84389200 | 0.06600300  |
| C  | -2.69279400 | 1.05651200  | -0.83058200 |
| C  | -2.06823300 | 2.22791600  | -1.04669700 |
| C  | -0.68320500 | 2.49240500  | -0.62182400 |
| C  | -0.23144700 | 2.90702000  | 0.60671000  |
| S  | 0.66638600  | 2.16232900  | -1.69655900 |
| C  | 1.19212000  | 2.93617600  | 0.70346200  |
| H  | -0.90040900 | 3.13086100  | 1.42960400  |
| C  | 1.81231600  | 2.54998400  | -0.45445500 |
| H  | 1.72961500  | 3.21651600  | 1.60274400  |
| H  | 2.87441100  | 2.48231700  | -0.65529200 |
| H  | -3.72054400 | 0.92900700  | -1.15692700 |
| H  | -2.61383800 | 3.01570100  | -1.56409400 |

### 1v-P1

|    |             |             |             |
|----|-------------|-------------|-------------|
| Br | -0.86304700 | -2.75957600 | -0.66103600 |
| O  | 0.85629200  | -2.33205700 | 1.92194200  |
| C  | 2.33267700  | 0.24320100  | -0.25591000 |
| C  | 1.31019100  | -0.55018600 | 0.39010700  |
| C  | 2.02158500  | 1.26946900  | -1.18337000 |
| H  | 0.98475600  | 1.44668200  | -1.45250000 |
| C  | -1.14937800 | -0.98717000 | 0.02163600  |

|   |             |             |             |
|---|-------------|-------------|-------------|
| C | -0.05367100 | -0.16233800 | 0.33720300  |
| C | 1.68264000  | -1.69408900 | 1.24038300  |
| C | 3.01788900  | 2.02629300  | -1.78613100 |
| H | 2.74368800  | 2.81615000  | -2.48078600 |
| C | 3.71302500  | -0.05837500 | -0.04182300 |
| C | 4.37126200  | 1.75705800  | -1.52746900 |
| H | 5.14926100  | 2.34164000  | -2.01050800 |
| C | 4.06096700  | -1.19100100 | 0.78212500  |
| H | 5.11792900  | -1.41313200 | 0.91981000  |
| C | 3.11650700  | -1.97647000 | 1.35415300  |
| H | 3.38299800  | -2.83356600 | 1.96675000  |
| C | 4.70608400  | 0.70904800  | -0.67847400 |
| H | 5.75044200  | 0.46088900  | -0.50163000 |
| C | -2.45486100 | -0.49822100 | -0.08578200 |
| C | -2.77398300 | 0.88250600  | 0.04788200  |
| C | -4.20211300 | 1.14224800  | -0.37151800 |
| C | -4.84382100 | -0.26239800 | -0.28281500 |
| H | -4.70193100 | 1.88462100  | 0.26030600  |
| H | -5.23105700 | -0.42147400 | 0.73003600  |
| C | -1.78724400 | 1.75212900  | 0.40912800  |
| C | -0.47575700 | 1.21824700  | 0.89254100  |
| S | -1.82395300 | 3.49409700  | 0.38478800  |
| C | 0.45996400  | 2.37761600  | 1.05538000  |
| H | -0.68630900 | 0.87054900  | 1.93051700  |
| C | -0.12144200 | 3.57235600  | 0.87796900  |
| H | 1.48124700  | 2.25423800  | 1.38832000  |
| H | 0.33352500  | 4.54807800  | 1.00337200  |
| C | -3.68185200 | -1.24752600 | -0.54698300 |
| H | -3.79821100 | -2.20839200 | -0.03579000 |
| H | -3.58106700 | -1.47568400 | -1.61820700 |
| H | -5.67332700 | -0.39376100 | -0.98283700 |
| H | -4.22437300 | 1.52483100  | -1.40213000 |

### 1v-P2

|    |             |             |             |
|----|-------------|-------------|-------------|
| Br | -0.14508200 | -2.73417500 | -0.30378600 |
| O  | 0.86460200  | -0.97973900 | 2.76726200  |
| C  | 2.31266200  | 0.38451500  | -0.35973300 |
| C  | 1.32734500  | -0.03990900 | 0.58742400  |
| C  | 1.96595400  | 0.90769100  | -1.63656200 |
| H  | 0.91820600  | 0.98432500  | -1.90899600 |
| C  | -0.93225700 | -0.99532800 | -0.09019200 |
| C  | -0.13040700 | 0.08724900  | 0.29638900  |
| C  | 1.73568100  | -0.55460400 | 1.81064600  |
| C  | 2.93966900  | 1.31185400  | -2.52549500 |
| H  | 2.65109200  | 1.70755700  | -3.49590500 |
| C  | 3.70372700  | 0.27665400  | -0.02532900 |
| C  | 4.31155900  | 1.21331200  | -2.18956000 |
| H  | 5.06763100  | 1.53719900  | -2.89962400 |
| C  | 4.06658300  | -0.25594400 | 1.24256200  |
| H  | 5.12071000  | -0.33695300 | 1.49615100  |
| C  | 3.11105500  | -0.66423500 | 2.13843400  |
| H  | 3.37624400  | -1.07267700 | 3.10876600  |
| C  | 4.68071100  | 0.70364300  | -0.96346200 |
| H  | 5.73122900  | 0.61823900  | -0.69438900 |
| C  | -2.30449700 | -0.85636600 | -0.34470000 |
| C  | -2.91504200 | 0.39445100  | -0.23652700 |
| C  | -4.37669300 | 0.31866500  | -0.60510600 |
| C  | -4.67110700 | -1.20137900 | -0.54526000 |
| H  | -5.01619900 | 0.90558900  | 0.06446800  |
| H  | -5.03060700 | -1.45861500 | 0.45761700  |

|   |             |             |             |
|---|-------------|-------------|-------------|
| C | -2.14414900 | 1.49323100  | 0.13683100  |
| C | -0.76060900 | 1.35339400  | 0.41365400  |
| S | -2.67234200 | 3.15631100  | 0.34103000  |
| C | -0.16048000 | 2.60996300  | 0.78954000  |
| H | -0.04708600 | -0.86070400 | 2.44515100  |
| C | -1.04653700 | 3.63880600  | 0.79189900  |
| H | 0.88813400  | 2.71815800  | 1.03888800  |
| H | -0.85088600 | 4.67659100  | 1.03349600  |
| C | -3.30746800 | -1.89628100 | -0.79005600 |
| H | -3.20679700 | -2.84069600 | -0.24570000 |
| H | -3.15666300 | -2.12845400 | -1.85388800 |
| H | -5.43681700 | -1.51162000 | -1.26189500 |
| H | -4.52389500 | 0.71881000  | -1.61858800 |

### 1v-P3

|    |             |             |             |
|----|-------------|-------------|-------------|
| Br | 0.17824800  | 2.88251600  | -0.61534500 |
| O  | -0.15132400 | -2.31064500 | -1.51614400 |
| C  | 2.30499800  | -0.11747500 | 0.20701000  |
| C  | 1.04038200  | -0.58123200 | -0.28897800 |
| C  | 2.41797000  | 0.95874700  | 1.12706700  |
| H  | 1.51721400  | 1.43839200  | 1.49080300  |
| C  | -0.75289900 | 1.30014200  | -0.14957200 |
| C  | -0.24777600 | 0.03974900  | -0.04011300 |
| C  | 0.99861000  | -1.76333400 | -1.03278100 |
| C  | 3.64998400  | 1.37861000  | 1.58373700  |
| H  | 3.70865300  | 2.20123700  | 2.29172200  |
| C  | 3.50423200  | -0.79972200 | -0.18503700 |
| C  | 4.83631100  | 0.74118000  | 1.14984900  |
| H  | 5.80111300  | 1.08712000  | 1.51070900  |
| C  | 3.40697200  | -1.95070500 | -1.01566300 |
| H  | 4.31894000  | -2.46190700 | -1.31362300 |
| C  | 2.18582700  | -2.43654500 | -1.41157500 |
| H  | 2.09631400  | -3.32943900 | -2.02220100 |
| C  | 4.75865600  | -0.33280200 | 0.28964200  |
| H  | 5.65965500  | -0.85233000 | -0.02876800 |
| C  | -2.20686600 | 1.28339200  | -0.01032900 |
| C  | -2.62205800 | 0.01330200  | 0.14791500  |
| C  | -4.10002700 | -0.09711100 | 0.37339400  |
| C  | -4.57942500 | 1.34160900  | -0.01256500 |
| H  | -4.58344000 | -0.87408700 | -0.23109100 |
| H  | -4.95004200 | 1.32739400  | -1.04324700 |
| C  | -1.43225600 | -0.90395600 | 0.15562800  |
| C  | -1.45648300 | -1.97552600 | -0.96466900 |
| S  | -1.35918100 | -1.84559900 | 1.77691000  |
| C  | -2.03472400 | -3.23086000 | -0.36886900 |
| H  | -2.03052700 | -1.59025600 | -1.81253600 |
| C  | -1.98645500 | -3.28627600 | 0.96650300  |
| H  | -2.36496200 | -4.04864700 | -1.00030500 |
| H  | -2.28067000 | -4.13194500 | 1.58106300  |
| C  | -3.32805700 | 2.27714600  | 0.06233900  |
| H  | -3.31218600 | 3.02097800  | -0.74250900 |
| H  | -3.28712600 | 2.83431800  | 1.00909000  |
| H  | -5.39669500 | 1.69167400  | 0.62466100  |
| H  | -4.31894100 | -0.33581400 | 1.42432400  |

### 1v-ts1

|    |             |             |             |
|----|-------------|-------------|-------------|
| Br | -1.08382500 | -2.67069800 | -0.99425200 |
| O  | 0.76272000  | -2.48983300 | 1.82904400  |
| C  | 2.42459900  | 0.11067000  | -0.21416100 |
| C  | 1.34234500  | -0.67979600 | 0.36429400  |
| C  | 2.18142600  | 1.16302900  | -1.11908900 |

|   |             |             |             |
|---|-------------|-------------|-------------|
| H | 1.15906600  | 1.38667900  | -1.40621700 |
| C | -1.16643600 | -0.96205200 | -0.04388600 |
| C | 0.03129700  | -0.37286200 | 0.15964300  |
| C | 1.64693900  | -1.82421500 | 1.27570000  |
| C | 3.22986700  | 1.90546700  | -1.65305000 |
| H | 3.01500800  | 2.71623900  | -2.34413700 |
| C | 3.77274700  | -0.20357300 | 0.11248100  |
| C | 4.55653500  | 1.60745500  | -1.31108000 |
| H | 5.37417800  | 2.18602700  | -1.73185900 |
| C | 4.04753800  | -1.32415400 | 0.98936800  |
| H | 5.09032600  | -1.54249600 | 1.21282100  |
| C | 3.06763100  | -2.09495100 | 1.51614200  |
| H | 3.29019400  | -2.93489800 | 2.16809100  |
| C | 4.81974900  | 0.55456100  | -0.44123800 |
| H | 5.84536000  | 0.30130200  | -0.18289700 |
| C | -2.47921800 | -0.42231900 | 0.12106700  |
| C | -2.74193600 | 0.92972500  | 0.29336900  |
| C | -4.20728800 | 1.22662500  | 0.06072000  |
| C | -4.86364800 | -0.15658100 | 0.26499300  |
| H | -4.59567400 | 1.99697000  | 0.73567500  |
| H | -5.10416800 | -0.28877100 | 1.32614900  |
| C | -1.70564800 | 1.85440300  | 0.50303600  |
| C | -0.46657400 | 1.49868700  | 1.09011800  |
| S | -1.67780000 | 3.50373900  | -0.08946900 |
| C | 0.47264200  | 2.59857400  | 1.06443900  |
| H | -0.47132300 | 0.79973600  | 1.92083300  |
| C | -0.03108800 | 3.71288400  | 0.47386200  |
| H | 1.46474600  | 2.54622900  | 1.49536300  |
| C | 0.46229900  | 4.66612100  | 0.32624900  |
| H | -3.77185200 | -1.16810700 | -0.14550000 |
| H | -3.83139800 | -2.11632200 | 0.39882400  |
| H | -3.83606000 | -1.41652600 | -1.21426500 |
| H | -5.78812700 | -0.27805000 | -0.30647400 |
| H | -4.35528100 | 1.59023300  | -0.96755100 |

### 1v-TS2

|    |             |             |             |
|----|-------------|-------------|-------------|
| Br | -0.39146500 | -2.80967000 | -0.36240700 |
| O  | 0.51565100  | -0.49924100 | 2.69979600  |
| C  | 2.40145200  | 0.16551400  | -0.35179900 |
| C  | 1.32293300  | -0.20517800 | 0.49443900  |
| C  | 2.21766300  | 0.57923600  | -1.70165500 |
| H  | 1.21045200  | 0.60335700  | -2.11133700 |
| C  | -1.00085800 | -1.01589800 | -0.09185100 |
| C  | -0.07452200 | -0.01801400 | 0.14040700  |
| C  | 1.50253300  | -0.47253500 | 1.89851200  |
| C  | 3.29610800  | 0.92960500  | -2.49199000 |
| H  | 3.13009400  | 1.25000400  | -3.51784000 |
| C  | 3.74116200  | 0.09645000  | 0.15952800  |
| C  | 4.61322800  | 0.85734600  | -1.98610600 |
| H  | 5.45523400  | 1.12054800  | -2.62045600 |
| C  | 3.93308600  | -0.31307300 | 1.51963000  |
| H  | 4.95324500  | -0.38556100 | 1.89333000  |
| C  | 2.88135600  | -0.58175900 | 2.34787000  |
| H  | 3.03696900  | -0.85593400 | 3.38831500  |
| C  | 4.82274000  | 0.43812700  | -0.68306600 |
| H  | 5.83336700  | 0.37294400  | -0.28459100 |
| C  | -2.38447700 | -0.75301400 | -0.21651700 |
| C  | -2.91215400 | 0.54567900  | -0.11307100 |
| C  | -4.38486200 | 0.55867300  | -0.44698300 |
| C  | -4.78024900 | -0.93217900 | -0.30975500 |

|   |             |             |             |
|---|-------------|-------------|-------------|
| H | -4.96253600 | 1.21803100  | 0.20964700  |
| H | -5.11398100 | -1.12583900 | 0.71542700  |
| C | -2.05494300 | 1.59213000  | 0.16003300  |
| C | -0.64933600 | 1.32184500  | 0.51837100  |
| S | -2.37714200 | 3.29185300  | 0.04360000  |
| C | 0.11606400  | 2.59787600  | 0.47541600  |
| H | -0.64641500 | 1.00195100  | 1.62533200  |
| C | -0.66392400 | 3.67570500  | 0.29927700  |
| H | 1.18328400  | 2.63632400  | 0.65210200  |
| H | -0.36342300 | 4.71678700  | 0.29013900  |
| C | -3.47759400 | -1.72326600 | -0.57758000 |
| H | -3.40933400 | -2.65675300 | -0.01048500 |
| H | -3.37240300 | -1.99497000 | -1.63884600 |
| H | -5.59052100 | -1.21732600 | -0.98546000 |
| H | -4.52610500 | 0.91955700  | -1.47565700 |

#### 1v-TS3

|    |             |             |             |
|----|-------------|-------------|-------------|
| Br | -1.07772800 | -2.75904800 | 0.69572500  |
| O  | 0.54040100  | 1.18816000  | 2.66421700  |
| C  | 2.08722300  | -0.39901100 | -0.26874600 |
| C  | 1.07141600  | 0.06426900  | 0.64838600  |
| C  | 1.77808300  | -1.06274600 | -1.47936700 |
| H  | 0.73775300  | -1.23184600 | -1.73722300 |
| C  | -1.29352200 | -0.91062500 | 0.26061500  |
| C  | -0.29302700 | -0.03335300 | 0.35874700  |
| C  | 1.42288800  | 0.75884100  | 1.88092200  |
| C  | 2.78257100  | -1.50200800 | -2.32883700 |
| H  | 2.52039400  | -2.00891200 | -3.25397300 |
| C  | 3.46178100  | -0.19421800 | 0.06214000  |
| C  | 4.13528400  | -1.30164700 | -1.99911700 |
| H  | 4.91769500  | -1.65208700 | -2.66662000 |
| C  | 3.79591600  | 0.49470800  | 1.28375700  |
| H  | 4.85061600  | 0.64367100  | 1.50879200  |
| C  | 2.84532100  | 0.95949300  | 2.13594300  |
| H  | 3.10636700  | 1.48358300  | 3.05132000  |
| C  | 4.46358100  | -0.65611200 | -0.81546700 |
| H  | 5.50626100  | -0.49597200 | -0.54972100 |
| C  | -2.59133500 | -0.39504400 | -0.15402900 |
| C  | -2.56833800 | 0.93044700  | -0.36638300 |
| C  | -3.89626700 | 1.46633900  | -0.82786100 |
| C  | -4.84313600 | 0.26037000  | -0.53459900 |
| H  | -4.20025500 | 2.37857500  | -0.30044300 |
| H  | -5.34484100 | 0.42738000  | 0.42452200  |
| C  | -1.23831600 | 1.55348800  | -0.17860500 |
| C  | -0.91859000 | 2.52191100  | 0.83025700  |
| S  | -0.29010300 | 1.96474200  | -1.67278100 |
| C  | 0.19726900  | 3.29758900  | 0.51379200  |
| H  | -1.46153500 | 2.56626200  | 1.76371700  |
| C  | 0.67863000  | 3.05648500  | -0.76309200 |
| H  | 0.67349700  | 3.98565800  | 1.20222600  |
| H  | 1.54931300  | 3.51545200  | -1.21789500 |
| C  | -3.93606000 | -1.00485300 | -0.41740100 |
| H  | -4.26402000 | -1.68810300 | 0.37371000  |
| H  | -3.91505400 | -1.58702100 | -1.34949100 |
| H  | -5.61944100 | 0.14553100  | -1.29631000 |
| H  | -3.86606200 | 1.71744100  | -1.89853600 |

#### 1v-VQM

|    |             |             |             |
|----|-------------|-------------|-------------|
| Br | -2.12281600 | -2.69114800 | 0.30948700  |
| O  | 0.65140400  | -0.13965900 | 2.94771000  |
| C  | 2.12750400  | -0.74599500 | -0.40921700 |

|   |             |             |             |
|---|-------------|-------------|-------------|
| C | 1.09387600  | -0.59897900 | 0.63344800  |
| C | 1.80409100  | -1.03731500 | -1.74254700 |
| H | 0.76200800  | -1.16151300 | -2.02211500 |
| C | -1.47625900 | -0.84946700 | 0.13352700  |
| C | -0.20164300 | -0.69638700 | 0.36907400  |
| C | 1.48951200  | -0.27534500 | 2.05576900  |
| C | 2.80251500  | -1.16310300 | -2.70524600 |
| H | 2.53179500  | -1.38692500 | -3.73336100 |
| C | 3.48852800  | -0.58141400 | -0.05030800 |
| C | 4.14843300  | -1.00090700 | -2.35258900 |
| H | 4.92637900  | -1.09851000 | -3.10447800 |
| C | 3.84119000  | -0.27273400 | 1.32468700  |
| H | 4.89931200  | -0.15553400 | 1.55102800  |
| C | 2.92338300  | -0.12527800 | 2.30686500  |
| H | 3.20885600  | 0.10921000  | 3.32800800  |
| C | 4.48462500  | -0.71352700 | -1.03347900 |
| H | 5.52614700  | -0.58599600 | -0.74868600 |
| C | -2.46877600 | 0.16363700  | -0.24398200 |
| C | -2.21647400 | 1.49014100  | -0.28174300 |
| C | -3.41622300 | 2.28628600  | -0.73973900 |
| C | -4.52152100 | 1.22139900  | -0.98145100 |
| H | -3.69712100 | 3.02674200  | 0.02144000  |
| H | -5.39184800 | 1.41194200  | -0.34703500 |
| C | -0.93236100 | 2.11003000  | 0.07134800  |
| C | -0.44613400 | 2.41793200  | 1.31795800  |
| S | 0.26649100  | 2.46918600  | -1.16267700 |
| C | 0.89036400  | 2.91830000  | 1.29597200  |
| H | -1.01193200 | 2.23857400  | 2.22473500  |
| C | 1.40993900  | 2.99444600  | 0.03192800  |
| H | 1.44521600  | 3.19281600  | 2.18658800  |
| H | 2.39275700  | 3.33555200  | -0.26913000 |
| C | -3.89029000 | -0.16063300 | -0.64871800 |
| H | -4.42003300 | -0.67565300 | 0.16171900  |
| H | -3.90754300 | -0.84559600 | -1.50561200 |
| H | -4.87015000 | 1.24850600  | -2.01781400 |
| H | -3.17605400 | 2.86031000  | -0.64551000 |

#### 3a-TS4

|    |             |             |             |
|----|-------------|-------------|-------------|
| Br | 1.93405200  | -2.48533800 | -0.57033700 |
| O  | -0.97314000 | -3.19892000 | -1.30247500 |
| C  | 2.26826600  | 0.25183900  | 0.13053400  |
| C  | -2.42270500 | -0.35085000 | -0.04421200 |
| C  | -1.13770800 | -0.93055300 | -0.54097900 |
| C  | 1.85930100  | 1.64496600  | 0.40315500  |
| C  | -3.21755400 | 0.62330500  | -0.65578800 |
| H  | -2.98815200 | 0.95220700  | -1.65563800 |
| C  | 1.39036200  | -0.63996100 | -0.49384300 |
| C  | 0.01189800  | -0.22487400 | -0.81119800 |
| C  | 2.64829400  | 2.45884900  | 1.29312400  |
| H  | 2.29589900  | 3.46058000  | 1.52620000  |
| C  | -1.14035200 | -2.43117900 | -0.36258200 |
| C  | -4.34082400 | 1.15561000  | -0.01796700 |
| H  | -4.93326000 | 1.90921300  | -0.52981400 |
| C  | -2.87132700 | -0.88228100 | 1.20622400  |
| C  | 3.56873900  | -0.12561400 | 0.63795800  |
| H  | 3.95473900  | -1.10805300 | 0.39895700  |
| C  | -4.70663800 | 0.71664900  | 1.25485100  |
| H  | -5.56815400 | 1.14319800  | 1.76066600  |
| C  | 4.30380100  | 0.70572900  | 1.43042500  |
| H  | 5.27031600  | 0.37194600  | 1.79859000  |

|   |             |             |             |
|---|-------------|-------------|-------------|
| C | -2.26300000 | -2.09079700 | 1.75606500  |
| H | -2.58123100 | -2.40801400 | 2.74687000  |
| C | -1.45719100 | -2.87280800 | 1.00621300  |
| H | -1.12504300 | -3.85696200 | 1.32231400  |
| C | -3.98017500 | -0.31296200 | 1.84934600  |
| H | -4.28808200 | -0.71299500 | 2.81261400  |
| C | 3.82999000  | 2.01082400  | 1.79582200  |
| H | 4.42954300  | 2.63905100  | 2.44780000  |
| C | 0.76682600  | 2.11427100  | -0.27794800 |
| C | 0.12789000  | 1.22719300  | -1.30923200 |
| S | 0.03476500  | 3.70841100  | -0.22476300 |
| C | -0.95212300 | 2.01803300  | -1.98183800 |
| C | -1.05843200 | 3.28175300  | -1.56302500 |
| H | -1.49237700 | 1.62309300  | -2.83379200 |
| H | -1.71024500 | 4.05345700  | -1.95671200 |
| H | 0.90908100  | 1.09405200  | -2.09089400 |

### TS-rot

|    |             |             |             |
|----|-------------|-------------|-------------|
| Br | 0.75396300  | 0.69829400  | 2.49069100  |
| O  | -0.67860000 | -2.87628700 | -0.33811400 |
| C  | 1.24661500  | 1.34039300  | -0.33953200 |
| C  | -3.07867000 | -0.03654400 | -0.20980200 |
| C  | -1.79006800 | -0.75887800 | -0.12316400 |
| C  | 2.49909500  | 0.92063600  | -0.86388600 |
| C  | -3.19337800 | 1.32800900  | 0.09245700  |
| H  | -2.31352000 | 1.88216200  | 0.40589100  |
| C  | 0.38849500  | 0.53005600  | 0.55798400  |
| C  | -0.67161200 | -0.13663400 | 0.22401100  |
| C  | 3.19172200  | 1.86079900  | -1.66198600 |
| H  | 4.16098300  | 1.60061700  | -2.06915900 |
| C  | -1.72644400 | -2.23869900 | -0.43000500 |
| C  | -4.42264900 | 1.97700500  | 0.00170400  |
| H  | -4.48992100 | 3.03462600  | 0.24083100  |
| C  | -4.23520200 | -0.75280700 | -0.60620200 |
| C  | 0.73953600  | 2.61752700  | -0.64060000 |
| H  | -0.22227200 | 2.90049300  | -0.22380400 |
| C  | -5.56560300 | 1.27141500  | -0.39267000 |
| H  | -6.52394100 | 1.77770000  | -0.46367000 |
| C  | 1.43909300  | 3.50950500  | -1.44269400 |
| H  | 1.02720200  | 4.48966800  | -1.66370100 |
| C  | -4.13914900 | -2.16965300 | -0.91782100 |
| H  | -5.05430900 | -2.67364100 | -1.22261100 |
| C  | -2.98320200 | -2.86636900 | -0.84041600 |
| H  | -2.93531900 | -3.92574700 | -1.07350600 |
| C  | -5.46817200 | -0.08395800 | -0.69268900 |
| H  | -6.34975200 | -0.64218500 | -0.99750400 |
| C  | 2.68186000  | 3.12054100  | -1.94849600 |
| H  | 3.25997300  | 3.80009500  | -2.56873200 |
| C  | 3.12065900  | -0.40168000 | -0.66147200 |
| C  | 4.28541500  | -0.85723400 | -1.26014000 |
| S  | 2.48102100  | -1.66343700 | 0.38284700  |
| C  | 4.66079100  | -2.17199800 | -0.88231700 |
| H  | 4.86360500  | -0.27501600 | -1.96695200 |
| C  | 3.78145700  | -2.73263300 | 0.00663600  |
| H  | 5.54264300  | -2.67830500 | -1.26002000 |
| H  | 3.81487800  | -3.71824900 | 0.45471600  |

### 3a-VQM-rot

|    |            |             |            |
|----|------------|-------------|------------|
| Br | 1.71077500 | -2.82267800 | 0.40308400 |
|----|------------|-------------|------------|

|   |             |             |             |
|---|-------------|-------------|-------------|
| O | -0.85519000 | -0.15611200 | 2.97156900  |
| C | 2.45622100  | -0.02584100 | -0.23905700 |
| C | -2.21425200 | -0.60627200 | -0.45461000 |
| C | -1.21761300 | -0.50014100 | 0.62566600  |
| C | 2.21740900  | 1.35503600  | -0.47153100 |
| C | -1.85221500 | -0.92009000 | -1.77353000 |
| H | -0.80800800 | -1.10193000 | -2.00930700 |
| C | 1.33720000  | -0.90718500 | 0.16396900  |
| C | 0.08385800  | -0.62123700 | 0.38846200  |
| C | 3.27833600  | 2.18241100  | -0.85572900 |
| H | 3.07692400  | 3.23593500  | -1.02638700 |
| C | -1.65466900 | -0.19348100 | 2.03586900  |
| C | -2.81546600 | -0.99920400 | -2.77613300 |
| H | -2.51536400 | -1.24416200 | -3.79121000 |
| C | -3.57909000 | -0.37186000 | -0.15214500 |
| C | 3.75969100  | -0.51730100 | -0.40845700 |
| H | 3.96407600  | -1.56690700 | -0.23607900 |
| C | -4.16426600 | -0.76459900 | -2.47973800 |
| H | -4.91515200 | -0.82506800 | -3.26242700 |
| C | 4.80387700  | 0.32182100  | -0.79427300 |
| H | 5.80145900  | -0.09077400 | -0.91473800 |
| C | -3.96977300 | -0.03849100 | 1.20601100  |
| H | -5.02755300 | 0.14088700  | 1.38888200  |
| C | -3.08546600 | 0.05464200  | 2.22512600  |
| H | -3.39857200 | 0.30017400  | 3.23553600  |
| C | -4.53889100 | -0.45563000 | -1.17573400 |
| H | -5.58325700 | -0.27345500 | -0.93435300 |
| C | 4.56821500  | 1.67689600  | -1.02079600 |
| H | 5.37740300  | 2.33609300  | -1.32164000 |
| C | 0.86882000  | 1.94153300  | -0.31622700 |
| C | -0.12743700 | 2.05314800  | -1.25764800 |
| S | 0.34945200  | 2.61129900  | 1.21778800  |
| C | -1.32595700 | 2.62372400  | -0.74053200 |
| H | -0.01387500 | 1.69203400  | -2.27369400 |
| C | -1.22449200 | 2.96016900  | 0.58510000  |
| H | -2.23052200 | 2.76053900  | -1.32281500 |
| H | -1.97863200 | 3.41021000  | 1.21875000  |

### 3a-TS6

|    |             |             |             |
|----|-------------|-------------|-------------|
| Br | 1.14513500  | 2.80401800  | -0.48364000 |
| O  | -0.71382200 | -0.18472700 | -2.87985800 |
| C  | 2.53366300  | 0.32013500  | 0.23940000  |
| C  | -2.16868700 | 0.34050900  | 0.46104500  |
| C  | -1.17250100 | 0.16749600  | -0.56769500 |
| C  | 2.37858300  | -1.06225600 | 0.44775900  |
| C  | -1.82519100 | 0.59320600  | 1.81026600  |
| H  | -0.77915700 | 0.70056400  | 2.07764500  |
| C  | 1.25672500  | 0.92629700  | -0.14202900 |
| C  | 0.18880200  | 0.14013600  | -0.24594600 |
| C  | 3.46207200  | -1.84789000 | 0.82776300  |
| H  | 3.33455400  | -2.91479600 | 0.98727100  |
| C  | -1.55422400 | -0.06156500 | -1.96684200 |
| C  | -2.80597900 | 0.73435800  | 2.78385900  |
| H  | -2.51714700 | 0.93050600  | 3.81324800  |
| C  | -3.55282800 | 0.25213800  | 0.11859800  |
| C  | 3.77770100  | 0.92464700  | 0.41278900  |
| H  | 3.89628600  | 1.99131000  | 0.25263400  |
| C  | -4.16485300 | 0.63716300  | 2.44376100  |
| H  | -4.92920300 | 0.75229900  | 3.20726300  |

|   |             |             |             |
|---|-------------|-------------|-------------|
| C | 4.86607300  | 0.13261000  | 0.79120100  |
| H | 5.84070000  | 0.59339000  | 0.92516600  |
| C | -3.92003100 | -0.00092000 | -1.25379900 |
| H | -4.98080300 | -0.06959700 | -1.48908400 |
| C | -2.99251600 | -0.15558600 | -2.23172900 |
| H | -3.27820600 | -0.34469100 | -3.26296500 |
| C | -4.52709600 | 0.40461000  | 1.12167200  |
| H | -5.57738000 | 0.33700400  | 0.84667100  |
| C | 4.71299200  | -1.24189900 | 0.99737500  |
| H | 5.56751600  | -1.84498200 | 1.29035400  |
| C | 0.97786900  | -1.52983500 | 0.24270000  |
| C | 0.12662300  | -1.96282600 | 1.31517300  |
| S | 0.59473200  | -2.52388600 | -1.21355500 |
| C | -0.95140300 | -2.71653200 | 0.87455100  |
| H | 0.26367400  | -1.59879800 | 2.32579600  |
| C | -0.86860000 | -3.02939200 | -0.48433900 |
| H | -1.79137200 | -3.00974200 | 1.49357000  |
| H | -1.59746900 | -3.59073300 | -1.05763600 |

### 3a-P4

|    |             |             |             |
|----|-------------|-------------|-------------|
| Br | -0.36060800 | -2.76824300 | -0.81918000 |
| O  | 0.47877000  | 1.52154000  | -2.37807900 |
| C  | -2.39012900 | -0.84075800 | 0.07354900  |
| C  | 2.22320400  | -0.21015400 | 0.33367300  |
| C  | 1.17478900  | 0.25412200  | -0.51090100 |
| C  | -2.52070700 | 0.51820800  | 0.40493600  |
| C  | 1.98697300  | -0.95846900 | 1.52166700  |
| H  | 0.96554200  | -1.20556700 | 1.79360500  |
| C  | -0.98839900 | -1.07259600 | -0.27131100 |
| C  | -0.22887700 | 0.04269100  | -0.19447500 |
| C  | -3.74431300 | 1.05428700  | 0.77677000  |
| H  | -3.83812000 | 2.10443100  | 1.03898400  |
| C  | 1.43536600  | 1.06039500  | -1.65910600 |
| C  | 3.03378000  | -1.38437500 | 2.31680400  |
| H  | 2.82711500  | -1.95677600 | 3.21786800  |
| C  | 3.58378300  | 0.09807000  | -0.01102000 |
| C  | -3.49412800 | -1.68860000 | 0.10226100  |
| H  | -3.39101900 | -2.73930700 | -0.15088100 |
| C  | 4.36968600  | -1.08809200 | 1.96732800  |
| H  | 5.18577000  | -1.43205500 | 2.59703000  |
| C  | -4.73387100 | -1.14823900 | 0.46297000  |
| H  | -5.61002500 | -1.79013000 | 0.48511800  |
| C  | 3.83834800  | 0.88133800  | -1.18235600 |
| H  | 4.87289700  | 1.10756900  | -1.43454300 |
| C  | 2.82156700  | 1.35729600  | -1.95964400 |
| H  | 3.01573400  | 1.96557200  | -2.83919700 |
| C  | 4.63144000  | -0.35895100 | 0.82038100  |
| H  | 5.65668200  | -0.12148600 | 0.54385700  |
| C  | -4.86058600 | 0.20557900  | 0.79505600  |
| H  | -5.83285500 | 0.60488800  | 1.06874700  |
| C  | -1.14985700 | 1.17331500  | 0.34145800  |
| C  | -0.66084900 | 1.62973100  | 1.67898700  |
| S  | -1.08042400 | 2.69795000  | -0.74663900 |
| C  | -0.18281300 | 2.90063300  | 1.70965300  |
| H  | -0.65357100 | 0.92761800  | 2.50421100  |
| C  | -0.36427000 | 3.58983800  | 0.47542900  |
| H  | 0.26481700  | 3.37592400  | 2.57513200  |
| H  | -0.06589500 | 4.61671400  | 0.28955700  |

### 3a-TS7

|    |             |             |             |
|----|-------------|-------------|-------------|
| Br | 0.53879200  | -2.43551700 | -1.18018000 |
| O  | 0.20479900  | 2.93639200  | -0.65234200 |
| C  | -1.86781700 | -1.40617600 | 0.09074600  |
| C  | 2.35346400  | 0.15338900  | 0.38478200  |
| C  | 1.15446100  | 0.83020600  | -0.06681800 |
| C  | -2.44883600 | -0.21738400 | 0.56476700  |
| C  | 2.34473800  | -1.06549000 | 1.11615700  |
| H  | 1.39645700  | -1.51737500 | 1.38067700  |
| C  | -0.50828800 | -1.10529900 | -0.33358200 |
| C  | -0.14199100 | 0.19522600  | -0.07230400 |
| C  | -3.73682500 | -0.18458000 | 1.06961400  |
| H  | -4.17724600 | 0.74626900  | 1.41668100  |
| C  | 1.23441500  | 2.21519600  | -0.45198400 |
| C  | 3.51315300  | -1.67244300 | 1.54114100  |
| H  | 3.45553300  | -2.60150000 | 2.10352800  |
| C  | 3.63308000  | 0.77382500  | 0.18938700  |
| C  | -2.59456600 | -2.59635200 | 0.12342200  |
| H  | -2.15461000 | -3.51893000 | -0.24251200 |
| C  | 4.76928200  | -1.09623400 | 1.26503400  |
| H  | 5.68367300  | -1.58622300 | 1.58846800  |
| C  | -3.89210900 | -2.57431700 | 0.65075800  |
| H  | -4.46394500 | -3.49730800 | 0.69435500  |
| C  | 3.68868500  | 2.08953000  | -0.37228200 |
| H  | 4.66577700  | 2.54065600  | -0.53777800 |
| C  | 2.55296300  | 2.78930900  | -0.64348600 |
| H  | 2.58590100  | 3.80876300  | -1.01859300 |
| C  | 4.81445500  | 0.12054000  | 0.60961700  |
| H  | 5.76800100  | 0.61249600  | 0.42726500  |
| C  | -4.45872700 | -1.38818000 | 1.12709700  |
| H  | -5.46190800 | -1.39326700 | 1.54308400  |
| C  | -1.45798800 | 0.93290400  | 0.28362300  |
| C  | -1.47115000 | 1.99716000  | 1.31733300  |
| S  | -2.22365800 | 1.81101400  | -1.20584400 |
| C  | -2.27509100 | 3.07431400  | 1.06086100  |
| H  | -0.95638700 | 1.82458200  | 2.25704600  |
| C  | -2.76934500 | 3.07374900  | -0.26368100 |
| H  | -2.47674000 | 3.87678400  | 1.76007700  |
| H  | -3.39785500 | 3.84741000  | -0.69496100 |

### (aS,S,R)-4a

|    |             |             |             |
|----|-------------|-------------|-------------|
| Br | -0.30002300 | -2.76682000 | 0.72946700  |
| O  | -0.03762200 | 2.90555800  | -0.45735700 |
| C  | 1.99454200  | -1.30510700 | -0.24854000 |
| C  | -2.48610800 | 0.13283800  | -0.28784000 |
| C  | -1.17375900 | 0.75019000  | -0.18996800 |
| C  | 2.46952100  | -0.00317100 | -0.50088800 |
| C  | -2.69079900 | -1.19078700 | -0.74800800 |
| H  | -1.84865000 | -1.76036800 | -1.11089000 |
| C  | 0.56684600  | -1.21181100 | 0.06884200  |
| C  | 0.10352600  | 0.07273600  | -0.09114800 |
| C  | 3.78144800  | 0.21597500  | -0.89273200 |
| H  | 4.14987800  | 1.22066300  | -1.07161000 |
| C  | -1.14590800 | 2.15687400  | -0.23815500 |
| C  | -3.95379500 | -1.75013300 | -0.81158800 |
| H  | -4.06914000 | -2.76588500 | -1.18063000 |
| C  | -3.65746400 | 0.92051100  | -0.03177700 |
| C  | 2.84220100  | -2.40478600 | -0.36302600 |
| H  | 2.48260800  | -3.40745100 | -0.15407900 |
| C  | -5.09006800 | -1.00830900 | -0.42784900 |

|   |             |             |             |
|---|-------------|-------------|-------------|
| H | -6.07695400 | -1.46131100 | -0.46282800 |
| C | 4.16371500  | -2.18570300 | -0.77272700 |
| H | 4.83487900  | -3.03289100 | -0.88467000 |
| C | -3.52537400 | 2.32668900  | 0.15225400  |
| H | -4.41314500 | 2.91929300  | 0.35767400  |
| C | -2.31210800 | 2.93486600  | -0.02200300 |
| H | -2.19794000 | 4.01350800  | 0.01579000  |
| C | -4.93884900 | 0.31428500  | -0.06550400 |
| H | -5.80763600 | 0.92728600  | 0.16280800  |
| C | 4.62715600  | -0.89473800 | -1.04327400 |
| H | 5.65260700  | -0.74653700 | -1.37009300 |
| C | 1.35749300  | 0.94767400  | -0.13067800 |
| C | 1.21105100  | 2.27284200  | -0.85508700 |
| S | 1.80079400  | 1.53773300  | 1.65520500  |
| C | 2.28612400  | 3.19413600  | -0.33729600 |
| H | 1.19817700  | 2.12993300  | -1.94144600 |
| C | 2.59450700  | 2.94801200  | 0.94351300  |
| H | 2.67110400  | 4.02487200  | -0.91755100 |
| H | 3.26989500  | 3.53089000  | 1.56262300  |

#### IV. Optimization of the reaction condition.

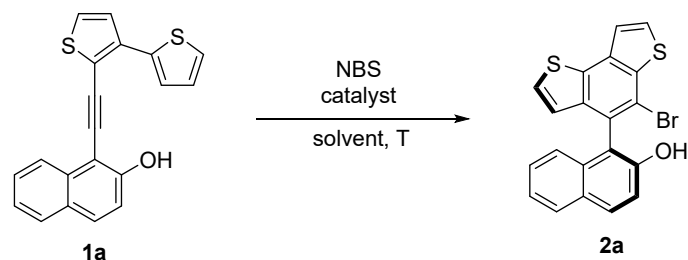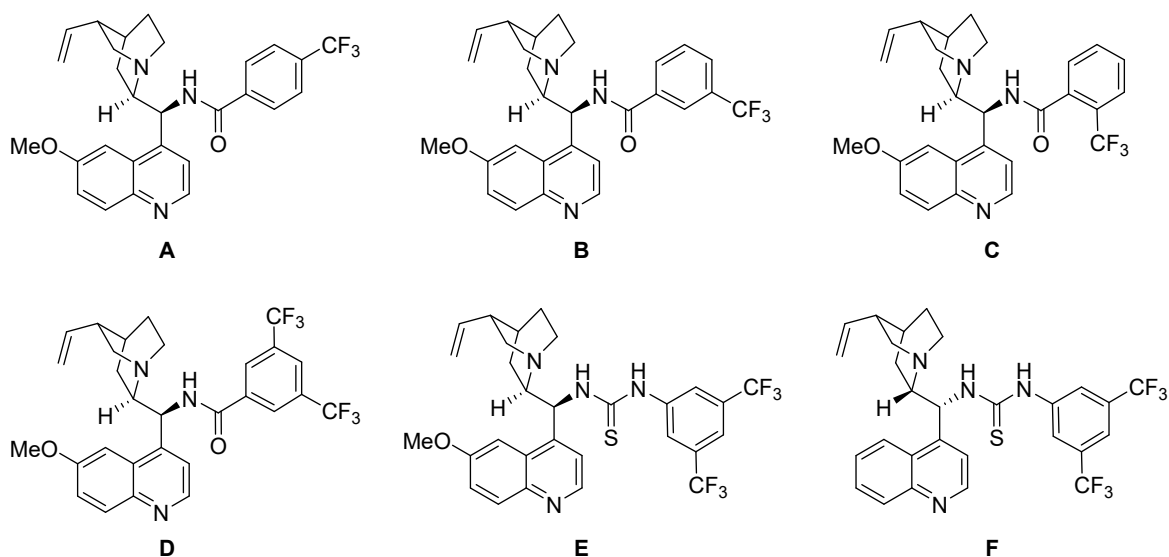

Supplementary Table 2. reaction screening

| entry           | catalyst (mol%) | solvent           | T (°C) | yield <sup>a</sup> (%) | ee <sup>b</sup> (%) |
|-----------------|-----------------|-------------------|--------|------------------------|---------------------|
| 1               | A (20)          | DCM               | -40    | 93                     | 72                  |
| 2               | B (20)          | DCM               | -40    | 91                     | 48                  |
| 3               | C (20)          | DCM               | -40    | 87                     | 21                  |
| 4               | D (20)          | DCM               | -40    | 82                     | 63                  |
| 5               | E (20)          | DCM               | -40    | 98                     | 9                   |
| 6               | F (20)          | DCM               | -40    | 97                     | -4                  |
| 7               | A (20)          | toluene           | -40    | 97                     | 93                  |
| 8               | A (20)          | acetone           | -40    | 95                     | 28                  |
| 9               | A (20)          | EA                | -40    | 96                     | 78                  |
| 10              | A (20)          | THF               | -40    | 95                     | 26                  |
| 11              | A (20)          | CHCl <sub>3</sub> | -40    | 94                     | 95                  |
| 12              | A (20)          | CHCl <sub>3</sub> | 0      | 85                     | 65                  |
| 13              | A (20)          | CHCl <sub>3</sub> | -20    | 93                     | 84                  |
| 14              | A (20)          | CHCl <sub>3</sub> | -60    | 99                     | 97                  |
| 15 <sup>c</sup> | A (20)          | CHCl <sub>3</sub> | -60    | 97                     | 97                  |
| 16 <sup>d</sup> | A (20)          | CHCl <sub>3</sub> | -60    | 99                     | 97                  |
| 17              | A (10)          | CHCl <sub>3</sub> | -60    | 94                     | 97                  |

Reaction conditions: **1a** (0.05 mmol, 1.0 equiv.), catalyst (0.01 mmol, 20 mol%) in solvent (1 mL) at corresponding temperature for 30 min. then NBS (0.05 mmol, 1.0 equiv.) at corresponding temperature for 3 h. <sup>a</sup>Isolated yield.

<sup>b</sup>Enantiomeric excess (ee) determined by HPLC. <sup>c</sup>Reaction in CHCl<sub>3</sub> (0.5 mL). <sup>d</sup>Reaction in CHCl<sub>3</sub> (1.5 mL).



## V. General procedure for asymmetric reaction

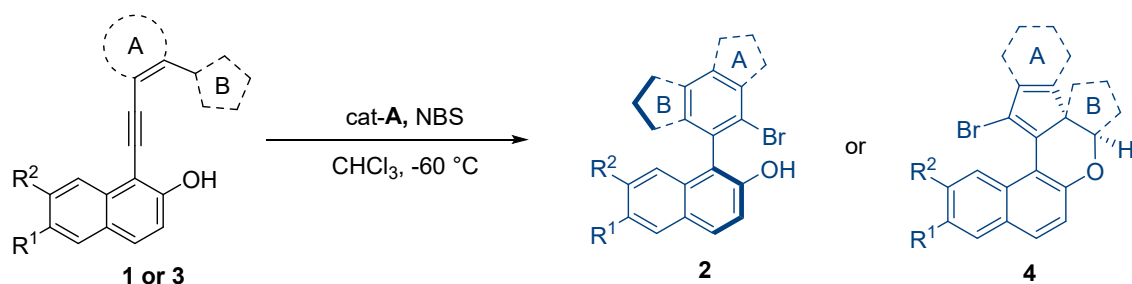

**Reaction condition [A]:** A solution of **1** or **3** (0.05 mmol, 1.0 equiv.) and catalyst-A (0.005 mmol, 10 mol%) in  $\text{CHCl}_3$  (1 mL) was stirred at  $-60\text{ }^\circ\text{C}$  for 30 min, then NBS (0.05 mmol, 1.0 equiv.) was added. After stirring at  $-60\text{ }^\circ\text{C}$  for 3 h, the reaction mixture was concentrated under reduced pressure. The resulting residue was purified by silica gel flash column chromatography using PE/EA eluent to afford the product **2** or **4**.

## VI. Experiments about other substituted VQMs

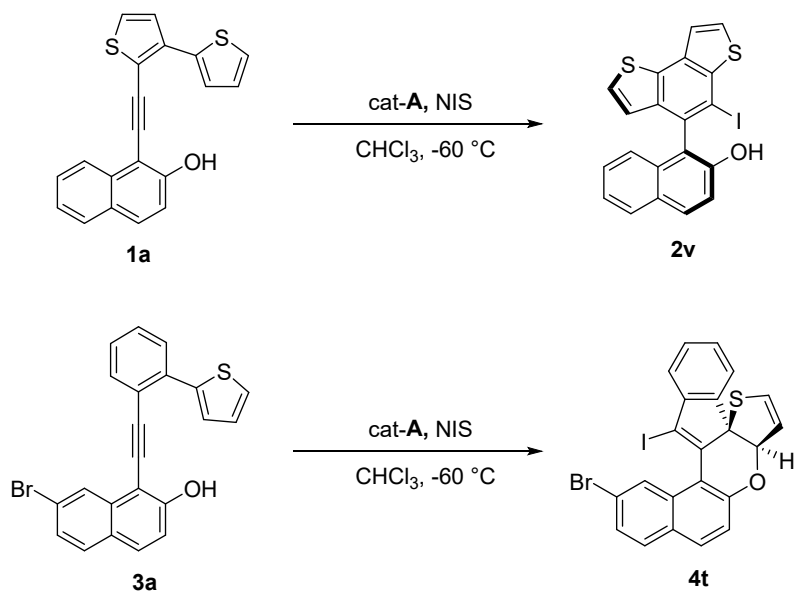

**Reaction condition:** A solution of **1** (0.05 mmol, 1.0 equiv.) and catalyst-A (0.005 mmol, 10 mol%) in  $\text{CHCl}_3$  (1 mL) was stirred at  $-60\text{ }^\circ\text{C}$  for 30 min, then NIS (0.05 mmol, 1.0 equiv.) was added. After stirring at  $-60\text{ }^\circ\text{C}$  for 3 h, the reaction mixture was concentrated under reduced pressure. The resulting residue was purified by silica gel flash column chromatography using PE/EA eluent to afford the product **2x** or **3s**.

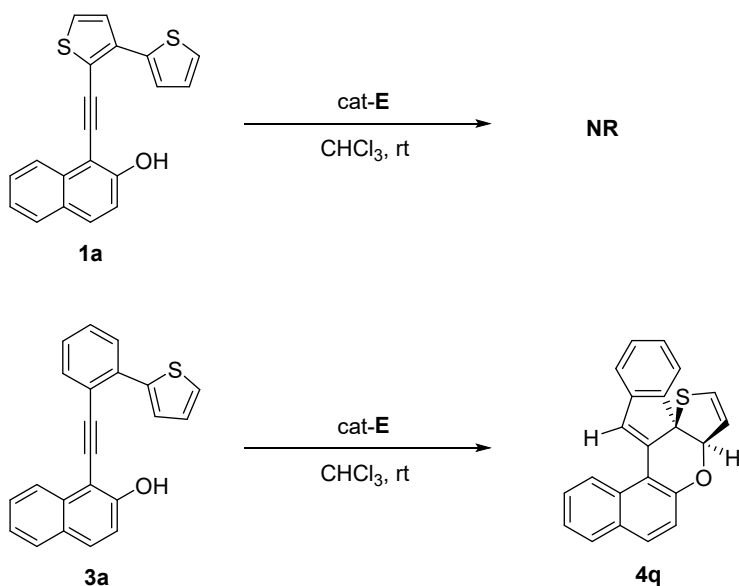

**Reaction condition:** A solution of **3** (0.05 mmol, 1.0 equiv.) and catalyst-E (0.005 mmol, 10 mol%) in  $\text{CHCl}_3$  (1 mL) was stirred at rt for 24h. Then the reaction mixture was concentrated under reduced pressure. The resulting residue was purified by silica gel flash column chromatography using PE/EA eluent to afford the product **4q**, **4r**, **4s**.

#### VII. $^1\text{H}$ , $^{13}\text{C}$ NMR and HRMS data of compounds (1a-1w)

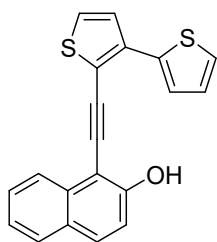

##### 1-([2,3'-bithiophen]-2'-ylethynyl)naphthalen-2-ol (**1a**)

Compound **1a** was synthesized following the general procedure (**Method A**).

Yellow solid. ( $R_f = 0.4$ , PE/EA = 6:1)

$^1\text{H}$  NMR (400 MHz,  $\text{CDCl}_3$ )  $\delta$  8.18 (d,  $J = 8.3$  Hz, 1H), 7.75 (d,  $J = 8.9$  Hz, 2H), 7.53 (dd,  $J = 9.4, 5.7$  Hz, 2H), 7.36 (t,  $J = 7.5$  Hz, 1H), 7.31 – 7.23 (m, 3H), 7.20 (d,  $J = 8.8$  Hz, 1H), 7.06 (t,  $J = 4.4$  Hz, 1H), 6.39 (s, 1H).

$^{13}\text{C}$  NMR (100 MHz,  $\text{CDCl}_3$ )  $\delta$  156.26, 138.03, 137.52, 133.42, 131.21, 128.39, 128.28, 127.52, 127.41, 127.39, 127.05, 125.54, 125.21, 124.85, 124.16, 116.51, 116.08, 102.62, 94.22, 90.24.

HRMS (ESI)  $m/z$  Calcd for  $\text{C}_{20}\text{H}_{12}\text{NaOS}_2^+$  [ $\text{M} + \text{Na}$ ] $^+$ : 355.0222, Found: 355.0221.

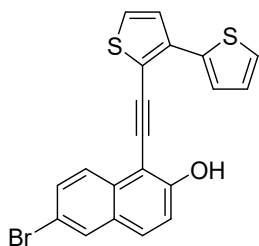

### 1-([2,3'-bithiophen]-2'-ylethynyl)-6-bromonaphthalen-2-ol (**1b**)

Compound **1b** was synthesized following the general procedure (**Method A**).

White solid. ( $R_f = 0.5$ , PE/EA= 5:1)

**<sup>1</sup>H NMR** (400 MHz, CDCl<sub>3</sub>)  $\delta$  8.01 (d,  $J = 8.9$  Hz, 1H), 7.89 (s, 1H), 7.63 (d,  $J = 8.9$  Hz, 1H), 7.59 – 7.46 (m, 2H), 7.36 – 7.22 (m, 3H), 7.19 (d,  $J = 9.0$  Hz, 1H), 7.07 (s, 1H), 6.38 (s, 1H).

**<sup>13</sup>C NMR** (100 MHz, CDCl<sub>3</sub>)  $\delta$  156.36, 138.31, 137.40, 131.92, 130.63, 130.16, 130.05, 129.49, 127.62, 127.44, 127.11, 126.66, 125.63, 125.32, 117.87, 117.64, 115.77, 102.93, 94.60, 89.53.

**HRMS (ESI)**  $m/z$  Calcd for C<sub>20</sub>H<sub>11</sub>BrNaOS<sub>2</sub><sup>+</sup> [M + Na]<sup>+</sup>: 432.9327, Found: 432.9327.

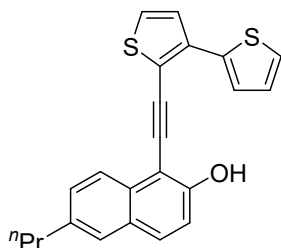

### 1-([2,3'-bithiophen]-2'-ylethynyl)-6-propylnaphthalen-2-ol (**1c**)

Compound **1c** was synthesized following the general procedure (**Method A**).

Black solid. ( $R_f = 0.5$ , PE/EA= 5:1)

**<sup>1</sup>H NMR** (400 MHz, CDCl<sub>3</sub>)  $\delta$  8.10 (d,  $J = 8.5$  Hz, 1H), 7.71 (d,  $J = 8.9$  Hz, 1H), 7.56 (d,  $J = 2.8$  Hz, 1H), 7.54 (s, 1H), 7.38 (dd,  $J = 8.5, 1.8$  Hz, 1H), 7.34 – 7.24 (m, 3H), 7.17 (d,  $J = 8.9$  Hz, 1H), 7.07 (dd,  $J = 5.1, 3.6$  Hz, 1H), 6.30 (s, 1H), 2.72 (t,  $J = 7.6$  Hz, 2H), 1.71 (h,  $J = 7.4$  Hz, 2H), 0.97 (t,  $J = 7.3$  Hz, 3H).

**<sup>13</sup>C NMR** (100 MHz, CDCl<sub>3</sub>)  $\delta$  155.78, 138.52, 138.00, 137.61, 131.84, 130.78, 129.11, 128.60, 127.43, 127.40, 127.31, 127.09, 126.93, 125.54, 125.21, 124.77, 116.42, 116.29, 102.48, 94.01, 90.51, 37.83, 24.46, 13.82.

**HRMS (ESI)**  $m/z$  Calcd for C<sub>23</sub>H<sub>18</sub>NaOS<sub>2</sub><sup>+</sup> [M + Na]<sup>+</sup>: 397.0691, Found: 397.0693.

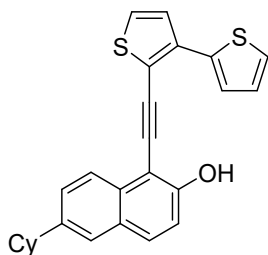

### 1-([2,3'-bithiophen]-2'-ylethynyl)-6-cyclohexylnaphthalen-2-ol (**1d**)

Compound **1d** was synthesized following the general procedure (**Method A**).

Black solid. ( $R_f = 0.4$ , PE/EA= 5:1)

**$^1\text{H NMR}$**  (400 MHz,  $\text{CDCl}_3$ )  $\delta$  8.11 (d,  $J = 8.6$  Hz, 1H), 7.71 (d,  $J = 8.9$  Hz, 1H), 7.56 (s, 2H), 7.42 (d,  $J = 8.6$  Hz, 1H), 7.28 (q,  $J = 5.4$  Hz, 3H), 7.17 (d,  $J = 8.9$  Hz, 1H), 7.07 (t,  $J = 4.4$  Hz, 1H), 6.29 (s, 1H), 2.63 (t,  $J = 11.2$  Hz, 1H), 1.94 (d,  $J = 12.1$  Hz, 2H), 1.87 (d,  $J = 11.5$  Hz, 2H), 1.77 (d,  $J = 12.6$  Hz, 1H), 1.55 – 1.38 (m, 4H), 1.33 – 1.24 (m, 1H).

**$^{13}\text{C NMR}$**  (100 MHz,  $\text{CDCl}_3$ )  $\delta$  155.80, 143.93, 137.97, 137.61, 131.97, 130.95, 128.64, 127.80, 127.41, 127.28, 127.07, 125.52, 125.19, 125.07, 124.78, 116.38, 116.29, 102.43, 93.95, 90.55, 44.29, 34.41, 26.90, 26.17.

**HRMS (ESI)**  $m/z$  Calcd for  $\text{C}_{26}\text{H}_{22}\text{NaOS}_2^+$  [ $\text{M} + \text{Na}$ ] $^+$ : 437.1004, Found: 437.1008.

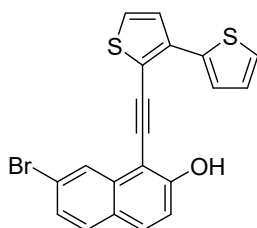

### 1-([2,3'-bithiophen]-2'-ylethynyl)-7-bromonaphthalen-2-ol (**1e**)

Compound **1e** was synthesized following the general procedure (**Method A**).

Yellow solid. ( $R_f = 0.5$ , PE/EA= 5:1)

**$^1\text{H NMR}$**  (400 MHz,  $\text{CDCl}_3$ )  $\delta$  8.34 (s, 1H), 7.70 (d,  $J = 8.9$  Hz, 1H), 7.60 (d,  $J = 8.6$  Hz, 1H), 7.54 (d,  $J = 3.7$  Hz, 1H), 7.44 (d,  $J = 8.5$  Hz, 1H), 7.33 (t,  $J = 4.5$  Hz, 2H), 7.28 (d,  $J = 5.3$  Hz, 1H), 7.19 (d,  $J = 8.9$  Hz, 1H), 7.11 (t,  $J = 4.4$  Hz, 1H), 6.39 (s, 1H).

**$^{13}\text{C NMR}$**  (100 MHz,  $\text{CDCl}_3$ )  $\delta$  156.80, 138.36, 137.38, 134.58, 130.96, 129.81, 127.64, 127.59, 127.53, 127.18, 127.16, 126.84, 125.65, 125.37, 122.19, 116.95, 115.74, 102.09, 94.71, 89.32.

**HRMS (ESI)**  $m/z$  Calcd for  $\text{C}_{20}\text{H}_{11}\text{BrNaOS}_2^+$  [ $\text{M} + \text{Na}$ ] $^+$ : 432.9327, Found: 432.9328.

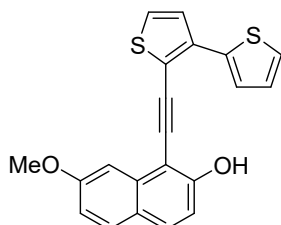

### 1-([2,3'-bithiophen]-2'-ylethynyl)-7-methoxynaphthalen-2-ol (**1f**)

Compound **1f** was synthesized following the general procedure (**Method A**).

Yellow solid. ( $R_f = 0.5$ , PE/EA= 5:1)

**$^1\text{H NMR}$**  (400 MHz,  $\text{CDCl}_3$ )  $\delta$  7.67 (t,  $J = 10.4$  Hz, 2H), 7.53 (d,  $J = 22.3$  Hz, 2H), 7.38 – 7.21 (m, 3H), 7.15 – 6.94 (m, 3H), 6.31 (s, 1H), 3.88 (s, 3H).

**$^{13}\text{C NMR}$**  (100 MHz,  $\text{CDCl}_3$ )  $\delta$  159.28, 156.78, 137.89, 137.60, 135.12, 131.00, 129.86, 127.42, 127.30, 127.08, 125.46, 125.16, 123.66, 116.56, 116.14, 113.84, 103.64, 101.88, 94.30, 90.52, 55.27.

**HRMS (ESI)**  $m/z$  Calcd for  $\text{C}_{21}\text{H}_{14}\text{NaO}_2\text{S}_2^+$  [ $\text{M} + \text{Na}$ ] $^+$ : 385.0327, Found: 385.0325.

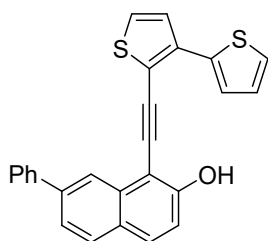

### 1-([2,3'-bithiophen]-2'-ylethynyl)-7-phenylnaphthalen-2-ol (**1g**)

Compound **1g** was synthesized following the general procedure (**Method A**).

Yellow solid. ( $R_f$  = 0.5, PE/EA = 5:1)

**<sup>1</sup>H NMR** (400 MHz, CDCl<sub>3</sub>) δ 8.41 (s, 1H), 7.80 (dd,  $J$  = 20.5, 8.7 Hz, 2H), 7.70 (d,  $J$  = 7.6 Hz, 2H), 7.63 (d,  $J$  = 8.4 Hz, 1H), 7.56 (s, 1H), 7.45 (t,  $J$  = 7.6 Hz, 2H), 7.36 (t,  $J$  = 7.4 Hz, 1H), 7.30 – 7.19 (m, 4H), 7.02 (s, 1H), 6.36 (s, 1H).

**<sup>13</sup>C NMR** (100 MHz, CDCl<sub>3</sub>) δ 156.60, 140.87, 140.19, 138.06, 137.52, 133.72, 130.89, 128.82, 127.60, 127.48, 127.44, 127.40, 127.13, 125.55, 125.24, 123.85, 122.92, 116.50, 116.06, 102.96, 94.64, 90.22.

**HRMS (ESI)**  $m/z$  Calcd for C<sub>26</sub>H<sub>16</sub>NaOS<sub>2</sub><sup>+</sup> [M + Na]<sup>+</sup>: 431.0535, Found: 431.0535.

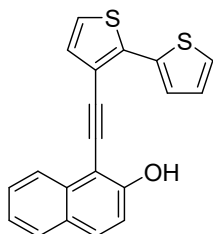

### 1-([2,2'-bithiophen]-3-ylethynyl)naphthalen-2-ol (**1h**)

Compound **1h** was synthesized following the general procedure (**Method A**).

Yellow solid. ( $R_f$  = 0.4, PE/EA = 5:1)

**<sup>1</sup>H NMR** (400 MHz, CDCl<sub>3</sub>) δ 8.20 (d,  $J$  = 8.4 Hz, 1H), 7.78 – 7.70 (m, 2H), 7.51 (t,  $J$  = 7.7 Hz, 1H), 7.45 (s, 1H), 7.35 (t,  $J$  = 7.6 Hz, 1H), 7.28 (d,  $J$  = 5.2 Hz, 1H), 7.22 – 7.16 (m, 2H), 7.14 (d,  $J$  = 4.9 Hz, 1H), 7.03 (s, 1H), 6.44 (s, 1H).

**<sup>13</sup>C NMR** (100 MHz, CDCl<sub>3</sub>) δ 156.20, 139.54, 135.40, 133.49, 131.22, 130.89, 128.39, 128.25, 127.44, 127.39, 125.97, 125.79, 124.87, 124.07, 123.36, 117.12, 116.46, 102.78, 96.36, 86.42.

**HRMS (ESI)**  $m/z$  Calcd for C<sub>20</sub>H<sub>12</sub>NaOS<sub>2</sub><sup>+</sup> [M + Na]<sup>+</sup>: 355.0222, Found: 355.0222.

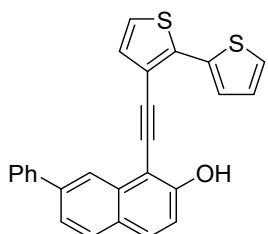

### 1-([2,2'-bithiophen]-3-ylethynyl)-7-phenylnaphthalen-2-ol (**1i**)

Compound **1i** was synthesized following the general procedure (**Method A**).

Yellow solid. ( $R_f$  = 0.5, PE/EA = 5:1)

**<sup>1</sup>H NMR** (400 MHz, CDCl<sub>3</sub>) δ 8.43 (s, 1H), 7.83 (d, *J* = 8.4 Hz, 1H), 7.77 (d, *J* = 8.9 Hz, 1H), 7.70 (d, *J* = 7.7 Hz, 2H), 7.63 (d, *J* = 8.4 Hz, 1H), 7.55 – 7.40 (m, 3H), 7.37 (t, *J* = 7.4 Hz, 1H), 7.25 (d, *J* = 5.1 Hz, 1H), 7.24 – 7.18 (m, 3H), 7.01 (t, *J* = 4.4 Hz, 1H), 6.42 (s, 1H).

**<sup>13</sup>C NMR** (100 MHz, CDCl<sub>3</sub>) δ 156.57, 141.00, 140.14, 139.64, 135.40, 133.80, 131.29, 130.60, 128.82, 128.79, 127.61, 127.50, 127.47, 127.45, 126.01, 125.86, 123.80, 123.42, 123.01, 117.08, 116.45, 103.12, 96.77, 86.36.

**HRMS (ESI)** *m/z* Calcd for C<sub>26</sub>H<sub>16</sub>NaOS<sub>2</sub><sup>+</sup> [*M* + Na]<sup>+</sup>: 431.0535, Found: 431.0533.

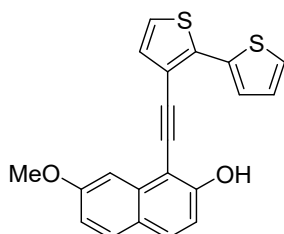

### 1-([2,2'-bithiophen]-3-ylethynyl)-7-methoxynaphthalen-2-ol (**1j**)

Compound **1j** was synthesized following the general procedure (**Method A**).

Yellow solid. (*R<sub>f</sub>* = 0.5, PE/EA = 5:1)

**<sup>1</sup>H NMR** (400 MHz, CDCl<sub>3</sub>) δ 7.67 (t, *J* = 8.5 Hz, 2H), 7.53 (s, 1H), 7.49 (d, *J* = 3.4 Hz, 1H), 7.30 (d, *J* = 5.1 Hz, 1H), 7.19 (s, 2H), 7.07 – 7.00 (m, 3H), 6.35 (s, 1H), 3.87 (s, 3H).

**<sup>13</sup>C NMR** (100 MHz, CDCl<sub>3</sub>) δ 159.26, 156.80, 139.55, 135.55, 135.20, 131.27, 130.71, 129.85, 127.47, 125.93, 125.77, 123.73, 123.39, 117.19, 116.45, 113.83, 103.81, 102.07, 96.43, 86.65, 55.29.

**HRMS (ESI)** *m/z* Calcd for C<sub>21</sub>H<sub>14</sub>NaO<sub>2</sub>S<sub>2</sub><sup>+</sup> [*M* + Na]<sup>+</sup>: 385.0327, Found: 385.0328.

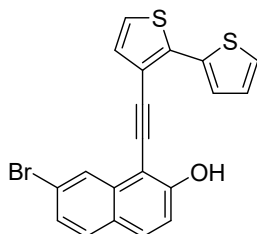

### 1-([2,2'-bithiophen]-3-ylethynyl)-7-bromonaphthalen-2-ol (**1k**)

Compound **1k** was synthesized following the general procedure (**Method A**).

Yellow solid. (*R<sub>f</sub>* = 0.5, PE/EA = 5:1)

**<sup>1</sup>H NMR** (400 MHz, CDCl<sub>3</sub>) δ 8.37 (s, 1H), 7.70 (d, *J* = 8.9 Hz, 1H), 7.61 (d, *J* = 8.6 Hz, 1H), 7.47 (d, *J* = 3.6 Hz, 1H), 7.44 (d, *J* = 8.6 Hz, 1H), 7.34 (d, *J* = 5.1 Hz, 1H), 7.25 – 7.18 (m, 3H), 7.09 (t, *J* = 4.4 Hz, 1H), 6.43 (s, 1H).

**<sup>13</sup>C NMR** (100 MHz, CDCl<sub>3</sub>) δ 156.82, 139.92, 135.27, 134.73, 131.25, 130.68, 129.82, 127.59, 127.53, 127.25, 126.90, 126.17, 126.00, 123.54, 122.11, 116.94, 102.31, 96.88, 93.48, 85.55.

**HRMS (ESI)** *m/z* Calcd for C<sub>20</sub>H<sub>11</sub>BrNaOS<sub>2</sub><sup>+</sup> [*M* + Na]<sup>+</sup>: 432.9327, Found: 432.9329.

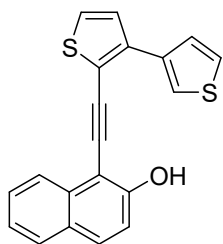

### 1-([3,3'-bithiophen]-2-ylethynyl)naphthalen-2-ol (**1l**)

Compound **1l** was synthesized following the general procedure (**Method A**).

Yellow solid. ( $R_f$  = 0.5, PE/EA = 5:1)

**<sup>1</sup>H NMR** (400 MHz, CDCl<sub>3</sub>) δ 8.15 (d,  $J$  = 8.3 Hz, 1H), 7.83 (s, 1H), 7.78 (dd,  $J$  = 8.4, 4.5 Hz, 2H), 7.65 (d,  $J$  = 4.5 Hz, 1H), 7.54 (t,  $J$  = 7.5 Hz, 1H), 7.40 (dt,  $J$  = 10.2, 5.2 Hz, 2H), 7.35 (d,  $J$  = 5.2 Hz, 1H), 7.26 (d,  $J$  = 5.3 Hz, 1H), 7.21 (d,  $J$  = 8.9 Hz, 1H), 6.15 (s, 1H).

**<sup>13</sup>C NMR** (100 MHz, CDCl<sub>3</sub>) δ 156.04, 139.98, 136.16, 133.39, 131.03, 128.42, 128.30, 127.74, 127.53, 127.23, 126.99, 126.11, 124.82, 124.18, 122.67, 116.76, 116.50, 102.72, 94.71.

**HRMS (ESI)**  $m/z$  Calcd for C<sub>20</sub>H<sub>12</sub>NaOS<sub>2</sub><sup>+</sup> [M + Na]<sup>+</sup>: 355.0222, Found: 355.0222.

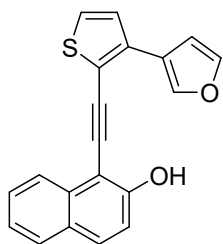

### 1-((3-(furan-3-yl)thiophen-2-yl)ethynyl)naphthalen-2-ol (**1m**)

Compound **1m** was synthesized following the general procedure (**Method A**).

Yellow solid. ( $R_f$  = 0.4, PE/EA = 5:1)

**<sup>1</sup>H NMR** (400 MHz, CDCl<sub>3</sub>) δ 8.17 (d,  $J$  = 8.4 Hz, 1H), 8.06 (s, 1H), 7.79 (d,  $J$  = 8.7 Hz, 2H), 7.54 (t,  $J$  = 7.6 Hz, 1H), 7.48 (s, 1H), 7.39 (t,  $J$  = 7.5 Hz, 1H), 7.35 (d,  $J$  = 5.3 Hz, 1H), 7.22 (d,  $J$  = 9.0 Hz, 1H), 7.17 (d,  $J$  = 5.3 Hz, 1H), 6.96 (s, 1H), 6.18 (s, 1H).

**<sup>13</sup>C NMR** (100 MHz, CDCl<sub>3</sub>) δ 156.11, 143.30, 140.18, 136.70, 133.46, 131.15, 128.42, 128.32, 127.60, 127.57, 126.98, 124.74, 124.19, 120.95, 116.49, 116.23, 109.33, 102.62, 94.23, 88.62.

**HRMS (ESI)**  $m/z$  Calcd for C<sub>20</sub>H<sub>12</sub>NaO<sub>2</sub>S<sup>+</sup> [M + Na]<sup>+</sup>: 339.0450, Found: 339.0455.

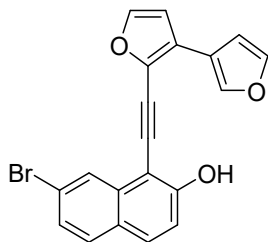

### 1-([3,3'-bifuran]-2-ylethynyl)-7-bromonaphthalen-2-ol (**1n**)

Compound **1n** was synthesized following the general procedure (**Method A**).

Yellow solid. ( $R_f$  = 0.5, PE/EA = 5:1)

$^1\text{H NMR}$  (400 MHz,  $\text{CDCl}_3$ )  $\delta$  8.32 (s, 1H), 7.89 (s, 1H), 7.76 (d,  $J$  = 9.0 Hz, 1H), 7.65 (d,  $J$  = 8.6 Hz, 1H), 7.58 – 7.39 (m, 3H), 7.22 (d,  $J$  = 9.0 Hz, 1H), 6.90 (s, 1H), 6.63 (d,  $J$  = 1.6 Hz, 1H), 6.27 (s, 1H).

$^{13}\text{C NMR}$  (100 MHz,  $\text{CDCl}_3$ )  $\delta$  157.05, 144.49, 143.77, 139.79, 134.67, 131.33, 129.91, 127.75, 127.01, 126.88, 123.10, 122.44, 117.28, 117.04, 110.51, 108.76, 101.46, 91.37, 88.73.

**HRMS (ESI)**  $m/z$  Calcd for  $\text{C}_{20}\text{H}_{11}\text{BrNaO}^+$  [ $\text{M} + \text{Na}$ ] $^+$ : 400.9784, Found: 400.9785.

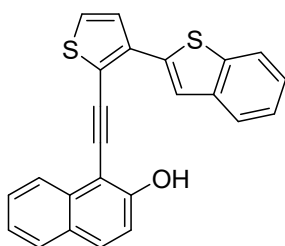

### 1-((3-(benzo[b]thiophen-2-yl)thiophen-2-yl)ethynyl)naphthalen-2-ol (**1o**)

Compound **1o** was synthesized following the general procedure (**Method A**).

Yellow solid. ( $R_f$  = 0.5, PE/EA = 5:1)

$^1\text{H NMR}$  (400 MHz,  $\text{CDCl}_3$ )  $\delta$  8.21 (d,  $J$  = 8.3 Hz, 1H), 7.86 – 7.71 (m, 5H), 7.52 (t,  $J$  = 7.6 Hz, 1H), 7.40 – 7.30 (m, 5H), 7.22 (d,  $J$  = 9.2 Hz, 1H), 6.44 (s, 1H).

$^{13}\text{C NMR}$  (100 MHz,  $\text{CDCl}_3$ )  $\delta$  156.49, 139.69, 139.25, 137.82, 137.35, 133.46, 131.34, 128.45, 128.33, 127.63, 127.48, 127.35, 124.87, 124.80, 124.71, 124.24, 123.70, 122.22, 122.05, 116.63, 102.60, 94.07, 90.95.

**HRMS (ESI)**  $m/z$  Calcd for  $\text{C}_{24}\text{H}_{14}\text{NaOS}_2^+$  [ $\text{M} + \text{Na}$ ] $^+$ : 405.0378, Found: 405.0380.

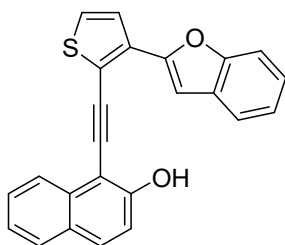

### 1-((3-(benzofuran-2-yl)thiophen-2-yl)ethynyl)naphthalen-2-ol (**1p**)

Compound **1p** was synthesized following the general procedure (**Method A**).

Yellow solid. ( $R_f$  = 0.5, PE/EA = 5:1)

$^1\text{H NMR}$  (400 MHz,  $\text{CDCl}_3$ )  $\delta$  8.21 (d,  $J$  = 8.2 Hz, 1H), 7.78 (d,  $J$  = 8.4 Hz, 2H), 7.66 (d,  $J$  = 8.1 Hz, 1H), 7.55 (d,  $J$  = 6.8 Hz, 2H), 7.43 – 7.35 (m, 2H), 7.35 – 7.29 (m, 2H), 7.28 – 7.18 (m, 3H), 6.89 (s, 1H).

$^{13}\text{C NMR}$  (100 MHz,  $\text{CDCl}_3$ )  $\delta$  156.87, 154.49, 151.96, 133.79, 133.19, 131.15, 128.47, 128.40, 128.33, 127.55, 127.32, 126.15, 124.98, 124.86, 124.18, 123.28, 121.08, 117.71, 116.55, 111.46, 103.94, 102.76, 94.44, 90.17.

**HRMS (ESI)**  $m/z$  Calcd for  $\text{C}_{24}\text{H}_{14}\text{NaO}_2\text{S}^+$  [ $\text{M} + \text{Na}$ ] $^+$ : 389.0607, Found: 389.0607.



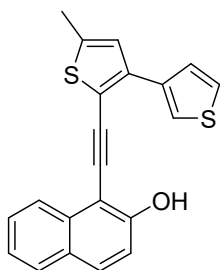

### 1-((5-methyl-[3,3'-bithiophen]-2-yl)ethynyl)naphthalen-2-ol (**1q**)

Compound **1q** was synthesized following the general procedure (**Method A**).

Yellow solid. ( $R_f = 0.5$ , PE/EA = 5:1)

**<sup>1</sup>H NMR** (400 MHz, CDCl<sub>3</sub>)  $\delta$  8.11 (d,  $J = 8.1$  Hz, 1H), 7.82 – 7.62 (m, 3H), 7.58 (d,  $J = 4.1$  Hz, 1H), 7.48 (t,  $J = 7.3$  Hz, 1H), 7.38 – 7.25 (m, 2H), 7.16 (d,  $J = 8.6$  Hz, 1H), 6.84 (s, 1H), 6.06 (s, 1H), 2.43 (s, 3H).

**<sup>13</sup>C NMR** (100 MHz, CDCl<sub>3</sub>)  $\delta$  155.85, 141.78, 139.94, 136.37, 133.36, 130.70, 128.38, 128.22, 127.37, 126.90, 126.00, 125.84, 124.80, 124.05, 122.40, 116.43, 114.17, 102.95, 95.07, 87.48, 15.43.

**HRMS (ESI)**  $m/z$  Calcd for C<sub>21</sub>H<sub>14</sub>NaOS<sub>2</sub><sup>+</sup> [M + Na]<sup>+</sup>: 369.0378, Found: 369.0380.

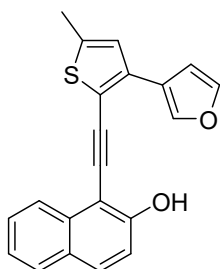

### 1-((3-(furan-3-yl)-5-methylthiophen-2-yl)ethynyl)naphthalen-2-ol (**1r**)

Compound **1r** was synthesized following the general procedure (**Method A**).

Yellow solid. ( $R_f = 0.5$ , PE/EA = 5:1)

**<sup>1</sup>H NMR** (400 MHz, CDCl<sub>3</sub>)  $\delta$  8.15 (d,  $J = 8.4$  Hz, 1H), 8.00 (s, 1H), 7.76 (dd,  $J = 8.4, 5.3$  Hz, 2H), 7.52 (t,  $J = 7.6$  Hz, 1H), 7.44 (s, 1H), 7.37 (t,  $J = 7.5$  Hz, 1H), 7.20 (d,  $J = 8.9$  Hz, 1H), 6.92 (s, 1H), 6.82 (s, 1H), 6.17 (s, 1H), 2.49 (s, 3H).

**<sup>13</sup>C NMR** (100 MHz, CDCl<sub>3</sub>)  $\delta$  156.02, 143.19, 142.25, 140.14, 136.79, 133.52, 130.92, 128.48, 128.30, 127.51, 125.33, 124.81, 124.14, 121.20, 116.46, 113.78, 109.34, 102.90, 94.71, 87.84, 15.50.

**HRMS (ESI)**  $m/z$  Calcd for C<sub>21</sub>H<sub>14</sub>NaO<sub>2</sub>S<sup>+</sup> [M + Na]<sup>+</sup>: 353.0607, Found: 353.0603.

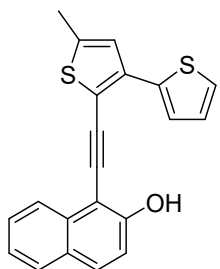

### 1-((5'-methyl-[2,3'-bithiophen]-2'-yl)ethynyl)naphthalen-2-ol (**1s**)

Compound **1s** was synthesized following the general procedure (**Method A**).

Orange solid. ( $R_f = 0.5$ , PE/EA= 5:1)

$^1\text{H NMR}$  (400 MHz,  $\text{CDCl}_3$ )  $\delta$  8.18 (d,  $J = 8.3$  Hz, 1H), 7.76 (dd,  $J = 8.9, 4.1$  Hz, 2H), 7.59 – 7.45 (m, 2H), 7.37 (t,  $J = 7.4$  Hz, 1H), 7.27 (d,  $J = 4.7$  Hz, 1H), 7.20 (d,  $J = 8.9$  Hz, 1H), 7.06 (d,  $J = 4.4$  Hz, 1H), 6.96 (s, 1H), 6.35 (s, 1H), 2.49 (s, 3H).  
 $^{13}\text{C NMR}$  (100 MHz,  $\text{CDCl}_3$ )  $\delta$  156.17, 142.04, 138.13, 137.88, 133.50, 130.99, 128.47, 128.27, 127.46, 127.36, 125.38, 125.36, 124.99, 124.94, 124.13, 116.51, 113.72, 102.92, 94.68, 89.49, 15.52.

**HRMS (ESI)**  $m/z$  Calcd for  $\text{C}_{21}\text{H}_{14}\text{NaOS}_2^+$  [ $\text{M} + \text{Na}$ ] $^+$ : 369.0378, Found: 369.0380.

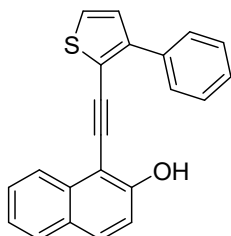

### 1-((3-phenylthiophen-2-yl)ethynyl)naphthalen-2-ol (1t)

Compound **1t** was synthesized following the general procedure (**Method A**).

Yellow solid. ( $R_f = 0.5$ , PE/EA= 5:1)

$^1\text{H NMR}$  (400 MHz,  $\text{CDCl}_3$ )  $\delta$  8.07 (d,  $J = 8.4$  Hz, 1H), 7.81 (d,  $J = 7.2$  Hz, 2H), 7.73 (t,  $J = 8.9$  Hz, 2H), 7.48 (dt,  $J = 11.0, 7.8$  Hz, 3H), 7.41 – 7.33 (m, 3H), 7.22 (d,  $J = 5.2$  Hz, 1H), 7.15 (d,  $J = 8.9$  Hz, 1H), 6.00 (s, 1H).  
 $^{13}\text{C NMR}$  (100 MHz,  $\text{CDCl}_3$ )  $\delta$  155.94, 145.37, 135.50, 133.28, 130.82, 128.78, 128.41, 128.25, 128.23, 128.03, 127.92, 127.40, 127.02, 124.88, 124.12, 117.74, 116.44, 102.79, 94.77, 87.39.

**HRMS (ESI)**  $m/z$  Calcd for  $\text{C}_{22}\text{H}_{14}\text{NaOS}^+$  [ $\text{M} + \text{Na}$ ] $^+$ : 349.0658, Found: 349.0662 .

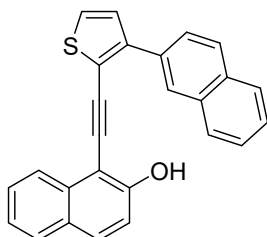

### 1-((3-(naphthalen-2-yl)thiophen-2-yl)ethynyl)naphthalen-2-ol (1u)

Compound **1u** was synthesized following the general procedure (**Method A**).

Yellow solid. ( $R_f = 0.5$ , PE/EA= 5:1)

$^1\text{H NMR}$  (400 MHz,  $\text{CDCl}_3$ )  $\delta$  8.28 (s, 1H), 8.04 (d,  $J = 8.2$  Hz, 1H), 7.91 (s, 2H), 7.86 – 7.78 (m, 2H), 7.70 (t,  $J = 8.7$  Hz, 2H), 7.52 – 7.44 (m, 2H), 7.43 – 7.25 (m, 4H), 7.13 (d,  $J = 8.9$  Hz, 1H), 6.03 (s, 1H).  
 $^{13}\text{C NMR}$  (100 MHz,  $\text{CDCl}_3$ )  $\delta$  155.97, 145.07, 133.41, 133.29, 132.82, 130.81, 128.43, 128.39, 128.22, 127.72, 127.47, 127.09, 126.83, 126.47, 126.30, 125.86, 124.85, 124.10, 117.91, 116.44, 102.77, 94.88, 87.67.

**HRMS (ESI)**  $m/z$  Calcd for  $\text{C}_{26}\text{H}_{16}\text{NaOS}^+$  [ $\text{M} + \text{Na}$ ] $^+$ : 399.0814 , Found: 399.0814 .

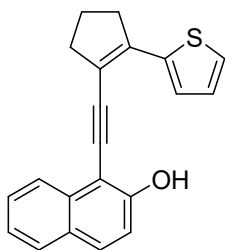

**1-((2-(thiophen-2-yl)cyclopent-1-en-1-yl)ethynyl)naphthalen-2-ol (1v)**

Compound **1v** was synthesized following the general procedure (**Method E**).

Black solid. ( $R_f = 0.5$ , PE/EA = 5:1)

**$^1\text{H NMR}$**  (400 MHz,  $\text{CDCl}_3$ )  $\delta$  8.20 (d,  $J = 8.3$  Hz, 1H), 7.74 (t,  $J = 8.0$  Hz, 2H), 7.52 (t,  $J = 7.5$  Hz, 1H), 7.35 (t,  $J = 7.5$  Hz, 1H), 7.28 (d,  $J = 5.0$  Hz, 1H), 7.23 – 7.17 (m, 2H), 7.02 (t,  $J = 4.2$  Hz, 1H), 6.60 (s, 1H), 2.97 – 2.87 (m, 4H), 2.07 (p,  $J = 7.6$  Hz, 2H).

**$^{13}\text{C NMR}$**  (100 MHz,  $\text{CDCl}_3$ )  $\delta$  155.99, 140.63, 139.16, 133.46, 130.74, 128.42, 128.23, 127.32, 126.77, 126.35, 125.57, 124.91, 124.01, 116.52, 116.44, 103.28, 99.23, 91.06, 38.74, 36.14, 22.71.

**HRMS (ESI)**  $m/z$  Calcd for  $\text{C}_{21}\text{H}_{16}\text{NaOS}^+$  [ $\text{M} + \text{Na}$ ] $^+$ : 339.0814, Found: 339.0816.

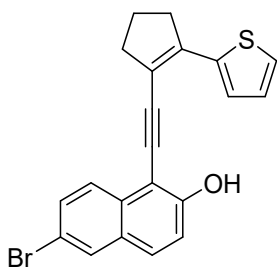

**6-bromo-1-((2-(thiophen-2-yl)cyclopent-1-en-1-yl)ethynyl)naphthalen-2-ol (1w)**

Compound **1w** was synthesized following the general procedure (**Method E**).

Black solid. ( $R_f = 0.5$ , PE/EA = 5:1)

**$^1\text{H NMR}$**  (400 MHz,  $\text{CDCl}_3$ )  $\delta$  8.05 (d,  $J = 8.8$  Hz, 1H), 7.91 (s, 1H), 7.64 (d,  $J = 8.9$  Hz, 1H), 7.57 (d,  $J = 8.8$  Hz, 1H), 7.31 (d,  $J = 5.0$  Hz, 1H), 7.24 – 7.14 (m, 2H), 7.07 – 7.02 (m, 1H), 6.58 (s, 1H), 2.93 (dt,  $J = 26.6, 7.3$  Hz, 4H), 2.14 – 2.06 (m, 2H).

**$^{13}\text{C NMR}$**  (100 MHz,  $\text{CDCl}_3$ )  $\delta$  156.13, 141.20, 139.05, 132.00, 130.48, 130.14, 129.62, 129.55, 126.84, 126.79, 126.54, 125.73, 117.73, 117.59, 116.24, 103.62, 99.59, 90.33, 38.70, 36.20, 22.74.

**HRMS (ESI)**  $m/z$  Calcd for  $\text{C}_{21}\text{H}_{15}\text{BrNaOS}^+$  [ $\text{M} + \text{Na}$ ] $^+$ : 416.9919, Found: 416.9925.

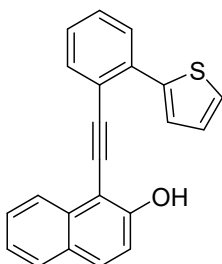

**1-((2-(thiophen-2-yl)phenyl)ethynyl)naphthalen-2-ol (3a)**

Compound **3a** was synthesized following the general procedure (**Method B**).

Yellow solid. ( $R_f = 0.5$ , PE/EA = 5:1)

$^1\text{H NMR}$  (400 MHz,  $\text{CDCl}_3$ )  $\delta$  8.10 (d,  $J = 8.1$  Hz, 1H), 7.80 – 7.70 (m, 3H), 7.59 – 7.55 (m, 1H), 7.54 – 7.48 (m, 2H), 7.43 (dd,  $J = 5.1, 1.3$  Hz, 1H), 7.42 – 7.32 (m, 3H), 7.21 – 7.12 (m, 2H), 6.14 (s, 1H).

$^{13}\text{C NMR}$  (100 MHz,  $\text{CDCl}_3$ )  $\delta$  156.28, 142.13, 135.74, 133.49, 133.15, 130.83, 129.74, 128.78, 128.37, 128.24, 127.64, 127.51, 127.35, 126.82, 126.17, 124.85, 124.03, 121.32, 116.46, 102.82, 100.74, 86.14.

**HRMS (ESI)**  $m/z$  Calcd for  $\text{C}_{22}\text{H}_{14}\text{NaOS}^+$  [ $\text{M} + \text{Na}$ ] $^+$ : 349.0658, Found: 349.0657.

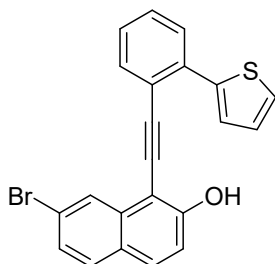

### 7-bromo-1-((2-(thiophen-2-yl)phenyl)ethynyl)naphthalen-2-ol (**3b**)

Compound **3b** was synthesized following the general procedure (**Method B**).

Yellow solid. ( $R_f = 0.5$ , PE/EA = 5:1)

$^1\text{H NMR}$  (400 MHz,  $\text{CDCl}_3$ )  $\delta$  8.24 (s, 1H), 7.75 (d,  $J = 7.1$  Hz, 1H), 7.67 (d,  $J = 8.9$  Hz, 1H), 7.62 – 7.53 (m, 2H), 7.51 (d,  $J = 3.0$  Hz, 1H), 7.48 – 7.29 (m, 4H), 7.19 (t,  $J = 4.4$  Hz, 1H), 7.14 (d,  $J = 8.9$  Hz, 1H), 6.17 (s, 1H).

$^{13}\text{C NMR}$  (100 MHz,  $\text{CDCl}_3$ )  $\delta$  156.89, 141.97, 135.86, 134.66, 133.24, 130.64, 129.81, 129.79, 129.01, 127.71, 127.65, 127.48, 127.13, 126.84, 126.81, 126.33, 122.04, 120.99, 116.89, 102.26, 101.18, 85.27.

**HRMS (ESI)**  $m/z$  Calcd for  $\text{C}_{22}\text{H}_{13}\text{BrNaOS}^+$  [ $\text{M} + \text{Na}$ ] $^+$ : 426.9763, Found: 426.9763.

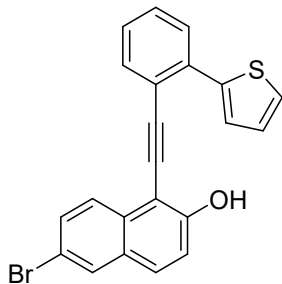

### 6-bromo-1-((2-(thiophen-2-yl)phenyl)ethynyl)naphthalen-2-ol (**3c**)

Compound **3c** was synthesized following the general procedure (**Method B**).

Yellow solid. ( $R_f = 0.6$ , PE/EA = 5:1)

$^1\text{H NMR}$  (400 MHz,  $\text{CDCl}_3$ )  $\delta$  7.94 – 7.85 (m, 2H), 7.73 (d,  $J = 6.4$  Hz, 1H), 7.61 (d,  $J = 9.0$  Hz, 1H), 7.58 – 7.51 (m, 2H), 7.49 (d,  $J = 2.8$  Hz, 1H), 7.44 – 7.34 (m, 3H), 7.20 – 7.11 (m, 2H), 6.13 (s, 1H).

$^{13}\text{C NMR}$  (100 MHz,  $\text{CDCl}_3$ )  $^{13}\text{C NMR}$  (101 MHz,  $\text{cdcl}_3$ )  $\delta$  156.39, 142.03, 135.87, 133.10, 132.00, 130.48, 130.13, 129.84, 129.71, 129.47, 128.98, 127.71, 127.52, 126.86, 126.68, 126.25, 121.08, 117.73, 117.59, 103.12, 101.09, 85.42.

**HRMS (ESI)**  $m/z$  Calcd for  $\text{C}_{22}\text{H}_{18}\text{NaO}^+$  [ $\text{M} + \text{Na}$ ] $^+$ : 426.9763, Found: 426.9763.

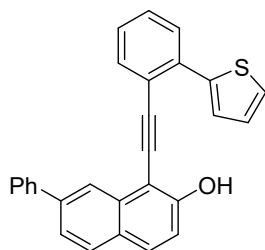

### 7-phenyl-1-((2-(thiophen-2-yl)phenyl)ethynyl)naphthalen-2-ol (3d)

Compound **3d** was synthesized following the general procedure (**Method B**).

Yellow solid. ( $R_f = 0.6$ , PE/EA = 5:1)

**$^1\text{H NMR}$**  (400 MHz,  $\text{CDCl}_3$ )  $\delta$  8.32 (s, 1H), 7.81 (d,  $J = 8.4$  Hz, 1H), 7.74 (t,  $J = 7.9$  Hz, 2H), 7.69 (d,  $J = 7.7$  Hz, 2H), 7.61 (d,  $J = 8.4$  Hz, 1H), 7.55 (d,  $J = 7.3$  Hz, 1H), 7.53 (d,  $J = 3.5$  Hz, 1H), 7.48 (t,  $J = 7.5$  Hz, 2H), 7.43 – 7.34 (m, 3H), 7.32 (d,  $J = 5.2$  Hz, 1H), 7.16 (d,  $J = 8.9$  Hz, 1H), 7.06 (t,  $J = 4.3$  Hz, 1H), 6.17 (s, 1H).

**$^{13}\text{C NMR}$**  (100 MHz,  $\text{CDCl}_3$ )  $\delta$  156.66, 142.05, 141.11, 140.13, 135.78, 133.76, 133.26, 130.55, 129.74, 128.88, 128.83, 128.75, 127.62, 127.53, 127.45, 126.81, 126.19, 123.79, 122.93, 121.14, 116.44, 103.11, 101.09, 86.09.

**HRMS (ESI)**  $m/z$  Calcd for  $\text{C}_{28}\text{H}_{18}\text{NaOS}^+$  [ $\text{M} + \text{Na}$ ] $^+$ : 425.0971, Found: 425.0971.

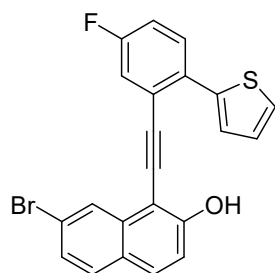

### 7-bromo-1-((5-fluoro-2-(thiophen-2-yl)phenyl)ethynyl)naphthalen-2-ol (3e)

Compound **3e** was synthesized following the general procedure (**Method B**).

Yellow solid. ( $R_f = 0.6$ , PE/EA = 5:1)

**$^1\text{H NMR}$**  (400 MHz,  $\text{CDCl}_3$ )  $\delta$  8.17 (s, 1H), 7.66 (d,  $J = 9.0$  Hz, 1H), 7.57 (d,  $J = 8.7$  Hz, 1H), 7.49 (t,  $J = 7.1$  Hz, 1H), 7.42 (d,  $J = 5.4$  Hz, 4H), 7.19 – 7.07 (m, 3H), 6.06 (s, 1H).

**$^{13}\text{C NMR}$**  (100 MHz,  $\text{CDCl}_3$ )  $\delta$  161.73 (d,  $J = 249.1$  Hz), 157.20, 140.95, 134.62, 132.27, 131.67 (d,  $J = 8.6$  Hz), 131.06, 129.82, 127.69, 127.61, 127.01, 126.97, 126.80, 126.39, 122.90 (d,  $J = 9.8$  Hz), 122.22, 119.36 (d,  $J = 23.3$  Hz), 116.94, 116.40 (d,  $J = 21.7$  Hz), 101.74, 99.89, 86.19.

**HRMS (ESI)**  $m/z$  Calcd for  $\text{C}_{22}\text{H}_{12}\text{BrFNaOS}^+$  [ $\text{M} + \text{Na}$ ] $^+$ : 444.9668, Found: 444.9665.

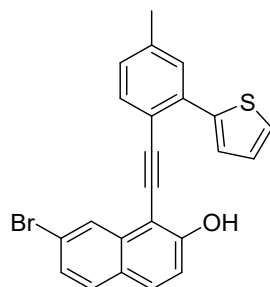

### 7-bromo-1-((4-methyl-2-(thiophen-2-yl)phenyl)ethynyl)naphthalen-2-ol (3f)

Compound **3f** was synthesized following the general procedure (**Method B**).

Yellow solid. ( $R_f = 0.4$ , PE/EA = 5:1)

$^1\text{H NMR}$  (400 MHz,  $\text{CDCl}_3$ )  $\delta$  8.22 (s, 1H), 7.61 (dd,  $J = 8.4, 3.9$  Hz, 2H), 7.55 (d,  $J = 8.6$  Hz, 1H), 7.48 (s, 1H), 7.40 (t,  $J = 6.5$  Hz, 2H), 7.34 (s, 1H), 7.21 – 7.07 (m, 3H), 6.16 (s, 1H), 2.39 (s, 3H).

$^{13}\text{C NMR}$  (100 MHz,  $\text{CDCl}_3$ )  $\delta$  156.68, 142.10, 139.30, 135.65, 134.60, 133.13, 130.44, 130.34, 129.72, 128.55, 127.59, 127.38, 127.13, 126.77, 126.69, 126.13, 121.92, 117.99, 116.82, 102.46, 101.38, 84.53, 21.46.

**HRMS (ESI)**  $m/z$  Calcd for  $\text{C}_{23}\text{H}_{15}\text{BrNaOS}^+$  [ $\text{M} + \text{Na}$ ] $^+$ : 440.9919, Found: 440.9919.

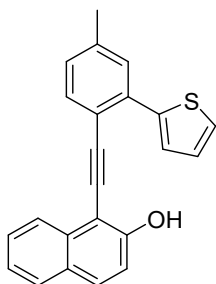

### 1-((4-methyl-2-(thiophen-2-yl)phenyl)ethynyl)naphthalen-2-ol (3g)

Compound **3g** was synthesized following the general procedure (**Method B**).

Yellow solid. ( $R_f = 0.5$ , PE/EA = 5:1)

$^1\text{H NMR}$  (400 MHz,  $\text{CDCl}_3$ )  $\delta$  8.09 (d,  $J = 8.3$  Hz, 1H), 7.70 (dd,  $J = 13.1, 8.5$  Hz, 2H), 7.62 (dd,  $J = 7.9, 1.6$  Hz, 1H), 7.53 – 7.44 (m, 2H), 7.42 – 7.36 (m, 1H), 7.36 – 7.26 (m, 2H), 7.13 (dd,  $J = 8.6, 2.4$  Hz, 3H), 6.14 (s, 1H), 2.38 (s, 3H).

$^{13}\text{C NMR}$  (100 MHz,  $\text{CDCl}_3$ )  $\delta$  156.09, 142.26, 139.06, 135.55, 133.45, 133.05, 130.57, 130.39, 128.52, 128.36, 128.19, 127.45, 127.25, 126.69, 125.98, 124.88, 123.96, 118.34, 116.41, 103.03, 100.92, 85.37, 21.43.

**HRMS (ESI)**  $m/z$  Calcd for  $\text{C}_{23}\text{H}_{16}\text{NaOS}^+$  [ $\text{M} + \text{Na}$ ] $^+$ : 363.0814, Found: 363.0812.

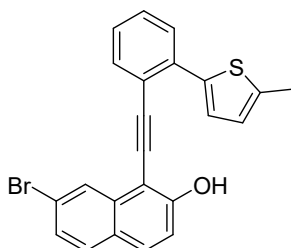

### 7-bromo-1-((2-(5-methylthiophen-2-yl)phenyl)ethynyl)naphthalen-2-ol (3h)

Compound **3h** was synthesized following the general procedure (**Method B**).

Yellow solid. ( $R_f = 0.5$ , PE/EA = 5:1)

$^1\text{H NMR}$  (400 MHz,  $\text{CDCl}_3$ )  $\delta$  8.26 (s, 1H), 7.72 (d,  $J = 7.5$  Hz, 1H), 7.66 (d,  $J = 8.9$  Hz, 1H), 7.58 (d,  $J = 8.7$  Hz, 1H), 7.51 (d,  $J = 7.4$  Hz, 1H), 7.44 – 7.30 (m, 4H), 7.15 (d,  $J = 8.9$  Hz, 1H), 6.82 (d,  $J = 3.6$  Hz, 1H), 6.30 (s, 1H), 2.55 (s, 3H).

$^{13}\text{C NMR}$  (100 MHz,  $\text{CDCl}_3$ )  $\delta$  156.96, 141.03, 139.54, 136.12, 134.70, 133.29, 130.55, 129.77, 129.43, 128.97, 127.44, 127.27, 127.18, 126.80, 126.76, 125.88, 121.98, 120.56, 116.92, 102.37, 101.40, 15.41.

**HRMS (ESI)**  $m/z$  Calcd for  $\text{C}_{23}\text{H}_{15}\text{BrNaOS}^+$  [ $\text{M} + \text{Na}$ ] $^+$ : 440.9919, Found: 440.9919.

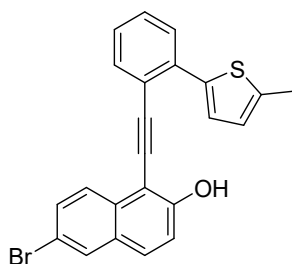

### 6-bromo-1-((2-(5-methylthiophen-2-yl)phenyl)ethynyl)naphthalen-2-ol (3i)

Compound **3i** was synthesized following the general procedure (**Method C**).

Yellow solid. ( $R_f = 0.5$ , PE/EA = 5:1)

**$^1\text{H NMR}$**  (400 MHz,  $\text{CDCl}_3$ )  $\delta$  7.95 (d,  $J = 8.8$  Hz, 1H), 7.88 (s, 1H), 7.70 (d,  $J = 7.4$  Hz, 1H), 7.60 (d,  $J = 9.0$  Hz, 1H), 7.52 (dd,  $J = 14.9, 8.3$  Hz, 2H), 7.37 (t,  $J = 7.4$  Hz, 1H), 7.32 (d,  $J = 7.5$  Hz, 1H), 7.29 (d,  $J = 3.7$  Hz, 1H), 7.16 (d,  $J = 8.9$  Hz, 1H), 6.80 (d,  $J = 2.4$  Hz, 1H), 6.27 (s, 1H), 2.54 (s, 3H).

**$^{13}\text{C NMR}$**  (100 MHz,  $\text{CDCl}_3$ )  $\delta$  156.48, 141.01, 139.62, 136.11, 133.18, 132.05, 130.41, 130.12, 129.63, 129.46, 128.94, 127.29, 126.73, 125.71, 120.68, 117.69, 117.63, 103.23, 101.30, 85.41, 15.35.

**HRMS (ESI)**  $m/z$  Calcd for  $\text{C}_{23}\text{H}_{15}\text{BrNaOS}^+ [\text{M} + \text{Na}]^+$ : 440.9919, Found: 440.9919.

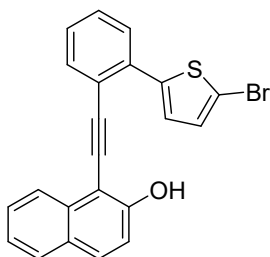

### 1-((2-(5-bromothiophen-2-yl)phenyl)ethynyl)naphthalen-2-ol (3j)

Compound **3j** was synthesized following the general procedure (**Method C**).

Yellow solid. ( $R_f = 0.5$ , PE/EA = 5:1)

**$^1\text{H NMR}$**  (400 MHz,  $\text{CDCl}_3$ )  $\delta$  8.06 (d,  $J = 8.3$  Hz, 1H), 7.76 (dt,  $J = 9.2, 4.6$  Hz, 3H), 7.56 – 7.48 (m, 2H), 7.39 (q,  $J = 9.0, 7.6$  Hz, 3H), 7.30 (d,  $J = 3.8$  Hz, 1H), 7.19 (d,  $J = 8.9$  Hz, 1H), 7.10 (d,  $J = 3.8$  Hz, 1H), 6.15 (s, 1H).

**$^{13}\text{C NMR}$**  (100 MHz,  $\text{CDCl}_3$ )  $\delta$  156.34, 143.60, 134.84, 133.53, 133.41, 131.04, 130.29, 129.39, 128.95, 128.42, 128.28, 128.02, 127.46, 127.11, 124.82, 124.13, 121.11, 116.51, 112.89, 102.67, 100.31, 86.64.

**HRMS (ESI)**  $m/z$  Calcd for  $\text{C}_{22}\text{H}_{13}\text{BrNaOS}^+ [\text{M} + \text{Na}]^+$ : 426.9763, Found: 426.9765.

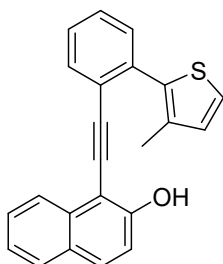

### 1-((2-(3-methylthiophen-2-yl)phenyl)ethynyl)naphthalen-2-ol (3k)

Compound **3k** was synthesized following the general procedure (**Method C**).

Yellow solid. ( $R_f = 0.5$ , PE/EA= 5:1)

$^1\text{H NMR}$  (400 MHz,  $\text{CDCl}_3$ )  $\delta$  7.95 (d,  $J = 8.4$  Hz, 1H), 7.78 – 7.67 (m, 3H), 7.49 (t,  $J = 7.7$  Hz, 1H), 7.46 – 7.28 (m, 5H), 7.11 (d,  $J = 8.8$  Hz, 1H), 7.03 (d,  $J = 4.7$  Hz, 1H), 5.76 (s, 1H), 2.19 (s, 3H).

$^{13}\text{C NMR}$  (100 MHz,  $\text{CDCl}_3$ )  $\delta$  156.14, 136.08, 135.87, 135.46, 133.31, 131.81, 131.29, 130.68, 130.20, 128.28, 128.16, 128.11, 127.30, 124.80, 124.40, 123.97, 116.41, 102.73, 100.42, 85.26, 14.51.

**HRMS (ESI)**  $m/z$  Calcd for  $\text{C}_{23}\text{H}_{16}\text{NaOS}^+$  [ $\text{M} + \text{Na}$ ] $^+$ : 363.0814, Found: 363.0815.

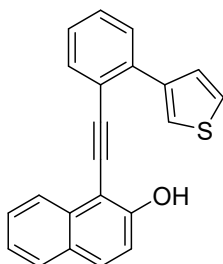

### 1-((2-(thiophen-3-yl)phenyl)ethynyl)naphthalen-2-ol (**3l**)

Compound **3l** was synthesized following the general procedure (**Method B**).

Yellow solid. ( $R_f = 0.5$ , PE/EA= 5:1)

$^1\text{H NMR}$  (400 MHz,  $\text{CDCl}_3$ )  $\delta$  8.03 (d,  $J = 8.3$  Hz, 1H), 7.71 (dd,  $J = 13.3, 8.3$  Hz, 3H), 7.57 (s, 1H), 7.52 – 7.42 (m, 4H), 7.39 – 7.32 (m, 3H), 7.13 (d,  $J = 9.0$  Hz, 1H), 5.91 (s, 1H).

$^{13}\text{C NMR}$  (100 MHz,  $\text{CDCl}_3$ )  $\delta$  156.12, 141.36, 138.13, 133.38, 132.61, 130.67, 129.32, 128.72, 128.34, 128.30, 128.20, 127.30, 126.06, 124.83, 124.01, 123.50, 121.34, 116.40, 102.83, 101.06, 85.23.

**HRMS (ESI)**  $m/z$  Calcd for  $\text{C}_{22}\text{H}_{14}\text{NaOS}^+$  [ $\text{M} + \text{Na}$ ] $^+$ : 349.0658, Found: 349.0658.

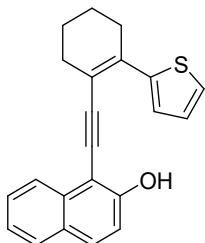

### 1-((2-(thiophen-2-yl)cyclohex-1-en-1-yl)ethynyl)naphthalen-2-ol (**3m**)

Compound **3m** was synthesized following the general procedure (**Method E**).

Yellow solid. ( $R_f = 0.5$ , PE/EA= 5:1)

$^1\text{H NMR}$  (400 MHz,  $\text{CDCl}_3$ )  $\delta$  8.11 (d,  $J = 8.3$  Hz, 1H), 7.73 (dd,  $J = 11.3, 8.8$  Hz, 2H), 7.49 (t,  $J = 7.6$  Hz, 1H), 7.38 (d,  $J = 3.4$  Hz, 1H), 7.35 (t,  $J = 7.5$  Hz, 1H), 7.27 (d,  $J = 5.0$  Hz, 1H), 7.17 (d,  $J = 8.9$  Hz, 1H), 7.04 (t, 1H), 6.43 (s, 1H), 2.67 – 2.57 (m, 4H), 1.86 – 1.75 (m, 4H).

$^{13}\text{C NMR}$  (100 MHz,  $\text{CDCl}_3$ )  $\delta$  155.88, 144.11, 135.87, 133.56, 130.53, 128.41, 128.20, 127.24, 126.62, 125.43, 124.90, 124.87, 123.95, 116.43, 115.67, 103.38, 103.19, 88.20, 32.18, 30.53, 22.53, 22.22.

**HRMS (ESI)**  $m/z$  Calcd for  $\text{C}_{22}\text{H}_{18}\text{NaOS}^+$  [ $\text{M} + \text{Na}$ ] $^+$ : 353.0971, Found: 353.0972.



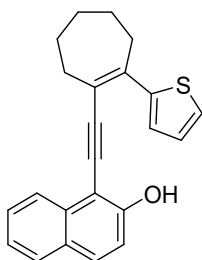

### 1-((2-(thiophen-2-yl)cyclohept-1-en-1-yl)ethynyl)naphthalen-2-ol (**3n**)

Compound **3n** was synthesized following the general procedure (**Method E**).

Yellow solid. ( $R_f = 0.5$ , PE/EA = 5:1)

**$^1\text{H NMR}$**  (400 MHz,  $\text{CDCl}_3$ )  $\delta$  8.06 (d,  $J = 8.3$  Hz, 1H), 7.73 (dd,  $J = 15.1, 8.5$  Hz, 2H), 7.49 (t,  $J = 7.4$  Hz, 1H), 7.40 (d,  $J = 3.4$  Hz, 1H), 7.35 (t,  $J = 7.4$  Hz, 1H), 7.30 (d,  $J = 5.0$  Hz, 1H), 7.15 (d,  $J = 8.9$  Hz, 1H), 6.36 (s, 1H), 2.83 – 2.75 (m, 4H), 1.91 – 1.84 (m, 2H), 1.79 – 1.68 (m, 4H).

**$^{13}\text{C NMR}$**  (100 MHz,  $\text{CDCl}_3$ )  $\delta$  155.71, 145.19, 142.64, 133.43, 130.34, 128.31, 128.11, 127.10, 126.73, 125.92, 124.99, 124.78, 123.82, 120.98, 116.34, 104.56, 103.48, 88.04, 36.73, 35.49, 31.86, 26.13, 25.98.

**HRMS (ESI)**  $m/z$  Calcd for  $\text{C}_{23}\text{H}_{20}\text{NaOS}^+$  [ $\text{M} + \text{Na}$ ] $^+$ : 367.1127, Found: 367.1125.

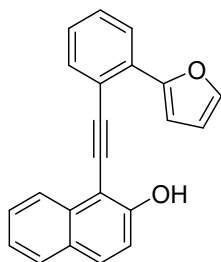

### 1-((2-(furan-2-yl)phenyl)ethynyl)naphthalen-2-ol (**3o**)

Compound **3o** was synthesized following the general procedure (**Method B**).

White solid. ( $R_f = 0.4$ , PE/EA = 8:1)

**$^1\text{H NMR}$**  (400 MHz,  $\text{CDCl}_3$ )  $\delta$  8.21 (dd,  $J = 8.4, 3.8$  Hz, 1H), 7.82 – 7.64 (m, 4H), 7.59 – 7.48 (m, 2H), 7.37 (q,  $J = 7.0$  Hz, 2H), 7.28 (t,  $J = 7.6$  Hz, 1H), 7.21 (dd,  $J = 8.8, 3.0$  Hz, 1H), 7.12 (t,  $J = 2.9$  Hz, 1H), 6.74 – 6.64 (m, 1H), 6.50 (s, 1H).

**$^{13}\text{C NMR}$**  (100 MHz,  $\text{CDCl}_3$ )  $\delta$  156.57, 152.76, 142.49, 133.70, 133.49, 131.57, 130.83, 128.84, 128.42, 128.28, 127.39, 127.25, 126.55, 124.84, 124.04, 118.36, 116.43, 111.76, 109.05, 102.99, 100.99, 85.75.

**HRMS (ESI)**  $m/z$  Calcd for  $\text{C}_{22}\text{H}_{14}\text{NaO}_2^+$  [ $\text{M} + \text{Na}$ ] $^+$ : 333.0886, Found: 333.0883.

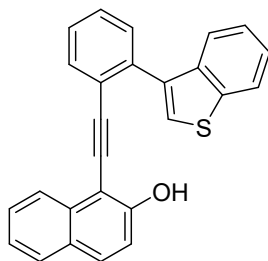

### 1-((2-(benzo[b]thiophen-3-yl)phenyl)ethynyl)naphthalen-2-ol (3p)

Compound **3p** was synthesized following the general procedure (**Method B**).

White solid. ( $R_f$  = 0.5, PE/EA = 6:1)

$^1\text{H NMR}$  (400 MHz,  $\text{CDCl}_3$ )  $\delta$  7.99 (d,  $J$  = 7.8 Hz, 1H), 7.82 (dd,  $J$  = 5.6, 3.3 Hz, 1H), 7.71 (d,  $J$  = 7.5 Hz, 1H), 7.68 – 7.59 (m, 3H), 7.58 (s, 1H), 7.52 – 7.44 (m, 3H), 7.39 (dt,  $J$  = 15.7, 7.2 Hz, 3H), 7.28 (t,  $J$  = 7.5 Hz, 1H), 7.01 (d,  $J$  = 8.9 Hz, 1H), 5.29 (s, 1H).

$^{13}\text{C NMR}$  (100 MHz,  $\text{CDCl}_3$ )  $\delta$  155.89, 140.17, 138.18, 137.46, 136.65, 133.34, 132.43, 130.58, 130.46, 128.64, 128.24, 128.08, 127.93, 127.22, 124.98, 124.77, 124.62, 124.50, 123.89, 123.27, 123.01, 116.33, 102.58, 100.64, 85.42.

**HRMS (ESI)**  $m/z$  Calcd for  $\text{C}_{26}\text{H}_{16}\text{NaOS}^+$  [ $\text{M} + \text{Na}$ ] $^+$ : 399.0814, Found: 399.0814.

### VIII. $^1\text{H}$ , $^{13}\text{C}$ NMR and HRMS data of compounds (2a-2x, 4a-4t)

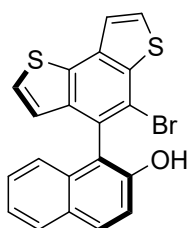

#### (aS)-1-(5-bromobenzo[1,2-b:3,4-b']dithiophen-4-yl)naphthalen-2-ol (2a)

Compound **2a** was synthesized in 94% yield (116.0 mg, 0.3 mmol scale) under condition [A].

White solid. ( $R_f$  = 0.3, PE/EA = 5:1)

$^1\text{H NMR}$  (400 MHz,  $\text{CDCl}_3$ )  $\delta$  7.96 (d,  $J$  = 8.8 Hz, 1H), 7.90 (d,  $J$  = 8.0 Hz, 1H), 7.85 – 7.65 (m, 2H), 7.44 – 7.23 (m, 4H), 7.12 (d,  $J$  = 8.4 Hz, 1H), 6.78 (d,  $J$  = 5.2 Hz, 1H), 4.97 (s, 1H).

$^{13}\text{C NMR}$  (100 MHz,  $\text{CDCl}_3$ )  $\delta$  150.72, 139.14, 138.76, 134.14, 134.07, 132.70, 130.56, 129.14, 128.89, 128.14, 126.90, 125.99, 125.72, 124.59, 124.35, 123.59, 122.73, 118.24, 117.53, 116.22.

**HRMS (ESI)**  $m/z$  Calcd for  $\text{C}_{20}\text{H}_{11}\text{BrNaOS}_2^+$  [ $\text{M} + \text{Na}$ ] $^+$ : 432.9327, Found: 432.9327.

**Optical Rotation:**  $[\alpha]_D^{25} = -95.0^\circ$  ( $c$  = 0.2, acetone).

**HPLC analysis:** Chiralcel IA-H (Hexane/*i*-PrOH = 90:10, flow rate = 1.0 mL/min, wave length = 254 nm),  $t_R$  = 12.202 min (minor),  $t_R$  = 19.388 min (major), 97% ee

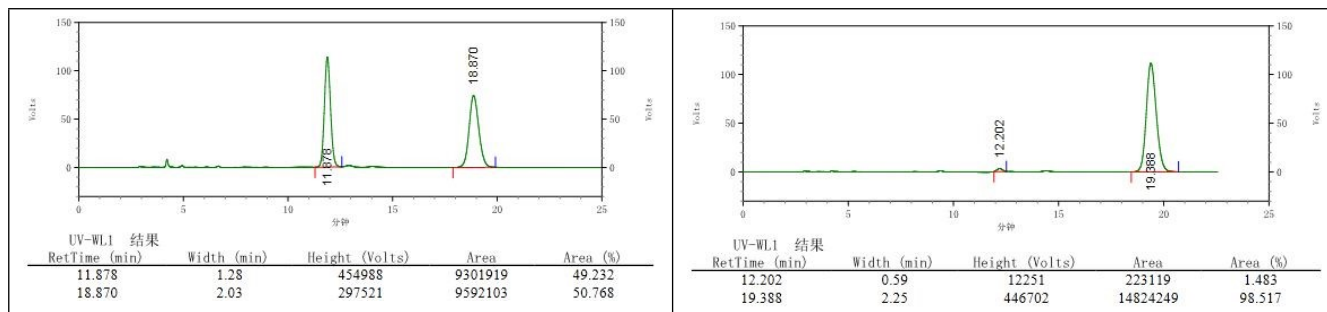

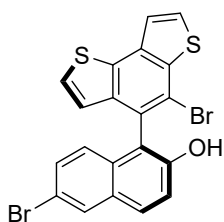

**(aS)-6-bromo-1-(5-bromobenzo[1,2-b:3,4-b']dithiophen-4-yl)naphthalen-2-ol (2b)**

Compound **2b** was synthesized in 93% yield (136.7 mg, 0.3 mmol scale) under condition [A].

White solid. ( $R_f$  = 0.3, PE/EA = 5:1)

$^1\text{H NMR}$  (400 MHz,  $\text{CDCl}_3$ )  $\delta$  8.04 (d,  $J$  = 2.1 Hz, 1H), 7.85 (d,  $J$  = 8.9 Hz, 1H), 7.77 (q,  $J$  = 5.4 Hz, 2H), 7.41 – 7.29 (m, 3H), 6.96 (d,  $J$  = 9.0 Hz, 1H), 6.73 (d,  $J$  = 5.4 Hz, 1H), 4.94 (s, 1H).

$^{13}\text{C NMR}$  (100 MHz,  $\text{CDCl}_3$ )  $\delta$  151.09, 139.15, 138.58, 134.27, 131.29, 130.15, 130.12, 130.05, 129.64, 129.42, 126.22, 126.03, 125.21, 124.31, 122.77, 118.74, 118.48, 117.43, 116.20.

**HRMS (ESI)**  $m/z$  Calcd for  $\text{C}_{20}\text{H}_{10}\text{Br}_2\text{NaOS}_2^+$  [ $\text{M} + \text{Na}$ ] $^+$ : 510.8432, Found: 510.8434.

**Optical Rotation:**  $[\alpha]_D^{25} = -89.0^\circ$  ( $c$  = 0.2, acetone).

**HPLC analysis:** Chiralcel IA-H (Hexane/*i*-PrOH = 90:10, flow rate = 1.0 mL/min, wave length = 254 nm),  $t_R$  = 12.632 min (minor),  $t_R$  = 18.188 min (major), 96% ee

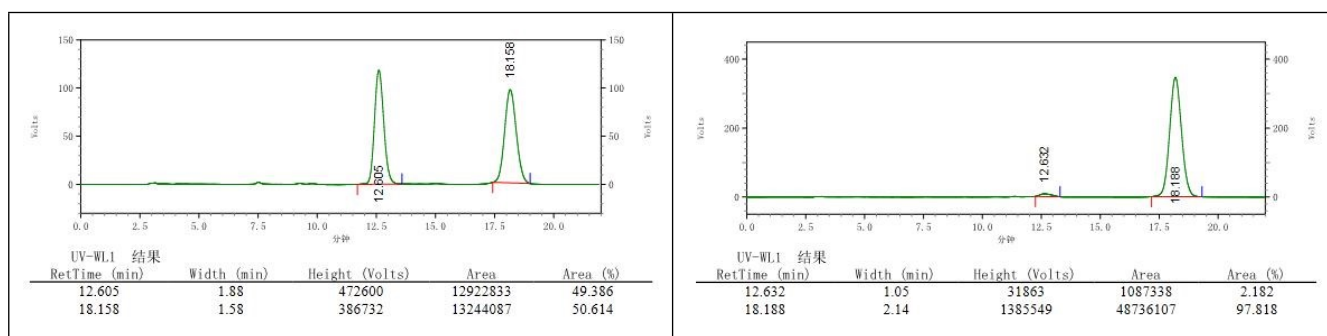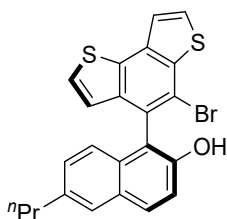

**(aS)-1-(5-bromobenzo[1,2-b:3,4-b']dithiophen-4-yl)-6-propylnaphthalen-2-ol (2c)**

Compound **2c** was synthesized in 90% yield (122.4 mg, 0.3 mmol scale) under condition [A].

White solid. ( $R_f$  = 0.3, PE/EA = 5:1)

$^1\text{H NMR}$  (400 MHz,  $\text{CDCl}_3$ )  $\delta$  7.86 (d,  $J$  = 8.9 Hz, 1H), 7.82 – 7.66 (m, 2H), 7.64 (s, 1H), 7.29 (d,  $J$  = 8.7 Hz, 2H), 7.11 (d,  $J$  = 8.5 Hz, 1H), 6.98 (d,  $J$  = 8.6 Hz, 1H), 6.75 (d,  $J$  = 5.2 Hz, 1H), 4.84 (s, 1H), 2.69 (t,  $J$  = 7.6 Hz, 2H), 1.69 (h,  $J$  = 7.1 Hz, 2H), 0.96 (t,  $J$  = 7.3 Hz, 3H).

$^{13}\text{C NMR}$  (100 MHz,  $\text{CDCl}_3$ )  $\delta$  150.12, 139.17, 138.81, 137.85, 134.11, 134.03, 131.10, 130.04, 129.14, 129.06, 128.47, 126.71, 126.27, 125.63, 124.70, 124.23, 122.74, 118.16, 117.42, 116.18, 37.85, 24.38, 13.96.

**HRMS (ESI)**  $m/z$  Calcd for  $\text{C}_{23}\text{H}_{17}\text{BrNaOS}_2^+$  [ $\text{M} + \text{Na}$ ] $^+$ : 474.9796, Found: 474.9794.

**Optical Rotation:**  $[\alpha]_D^{25} = -26.0^\circ$  ( $c = 0.2$ , acetone).

**HPLC analysis:** Chiralcel IA-H (Hexane/*i*-PrOH = 90:10, flow rate = 1.0 mL/min, wave length = 254 nm),  $t_R = 15.003$  min (minor),  $t_R = 16.785$  min (major), 96% ee

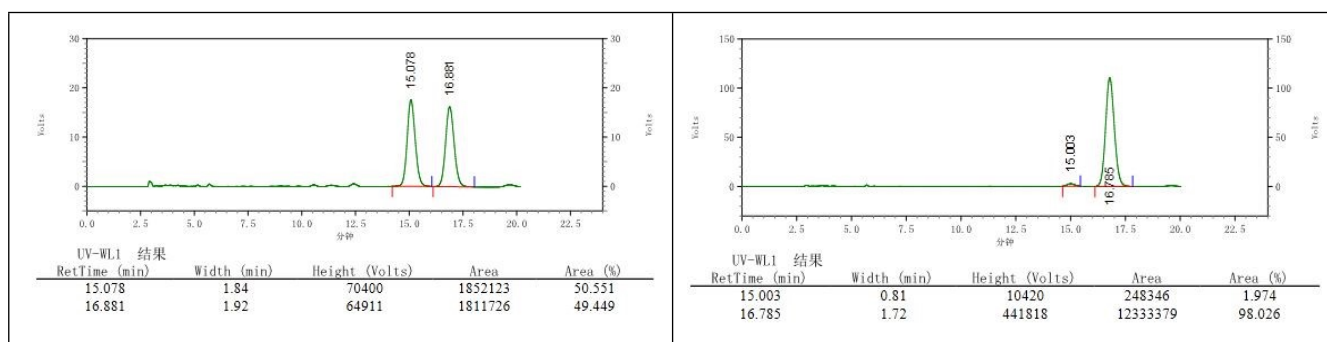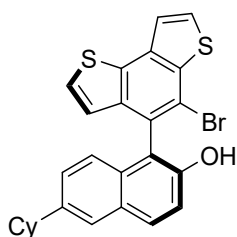

**(*aS*)-1-(5-bromobenzo[1,2-*b*:3,4-*b'*]dithiophen-4-yl)-6-cyclohexylnaphthalen-2-ol (2d)**

Compound **2d** was synthesized in 89% yield (131.8 mg, 0.3 mmol scale) under condition [A].

White solid. ( $R_f = 0.3$ , PE/EA = 5:1)

**<sup>1</sup>H NMR** (400 MHz, CDCl<sub>3</sub>)  $\delta$  7.88 (d,  $J = 8.9$  Hz, 1H), 7.84 – 7.68 (m, 2H), 7.66 (s, 1H), 7.39 – 7.26 (m, 2H), 7.16 (d,  $J = 8.6$  Hz, 1H), 6.99 (d,  $J = 8.7$  Hz, 1H), 6.77 (d,  $J = 5.4$  Hz, 1H), 4.82 (s, 1H), 2.60 (t,  $J = 11.1$  Hz, 1H), 1.94 (d,  $J = 11.9$  Hz, 2H), 1.85 (d,  $J = 11.9$  Hz, 2H), 1.76 (d,  $J = 12.9$  Hz, 1H), 1.53 – 1.35 (m, 4H), 1.30 – 1.25 (m, 1H).

**<sup>13</sup>C NMR** (100 MHz, CDCl<sub>3</sub>)  $\delta$  150.14, 143.18, 139.17, 138.83, 134.10, 134.02, 131.25, 130.22, 129.10, 129.05, 127.23, 126.33, 125.59, 124.82, 124.76, 124.24, 122.75, 118.12, 117.35, 116.17, 44.20, 34.38, 34.31, 26.91, 26.17.

**HRMS (ESI)  $m/z$**  Calcd for C<sub>26</sub>H<sub>21</sub>BrNaOS<sub>2</sub><sup>+</sup> [ $M + Na$ ]<sup>+</sup>: 515.0109, Found: 515.0110.

**Optical Rotation:**  $[\alpha]_D^{25} = -65.5^\circ$  ( $c = 0.2$ , acetone).

**HPLC analysis:** Chiralcel IA-H (Hexane/*i*-PrOH = 90:10, flow rate = 1.0 mL/min, wave length = 254 nm),  $t_R = 15.497$  min (major),  $t_R = 17.197$  min (minor), 96% ee

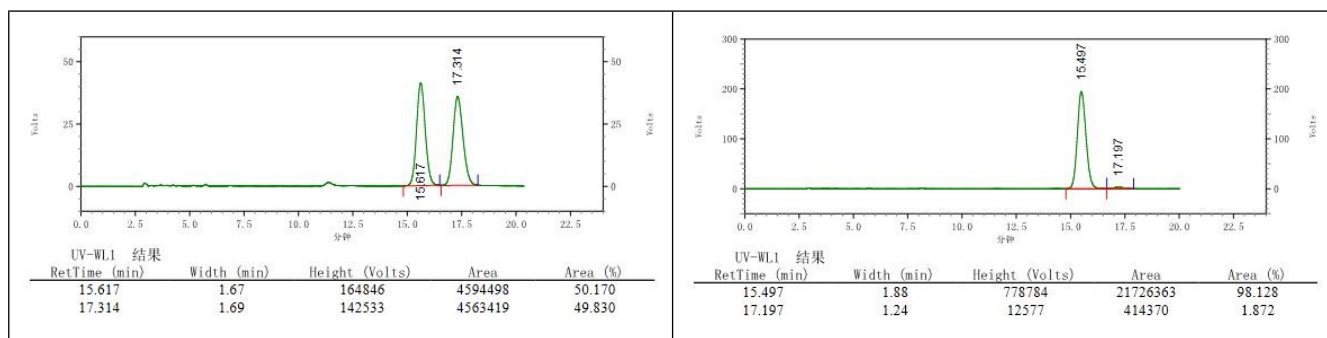

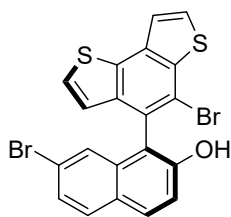

**(aS)-7-bromo-1-(5-bromobenzo[1,2-b:3,4-b']dithiophen-4-yl)naphthalen-2-ol (2e)**

Compound **2e** was synthesized in 79% yield (116.3 mg, 0.3 mmol scale) under condition [A].

White solid. ( $R_f$  = 0.3, PE/EA = 5:1)

$^1\text{H NMR}$  (400 MHz,  $\text{CDCl}_3$ )  $\delta$  7.89 (d,  $J$  = 8.9 Hz, 1H), 7.76 (dt,  $J$  = 15.9, 7.2 Hz, 3H), 7.42 (d,  $J$  = 8.6 Hz, 1H), 7.38 – 7.28 (m, 2H), 7.22 (s, 1H), 6.73 (d,  $J$  = 5.4 Hz, 1H), 4.94 (s, 1H).

$^{13}\text{C NMR}$  (100 MHz,  $\text{CDCl}_3$ )  $\delta$  151.64, 139.19, 138.53, 134.38, 134.37, 134.03, 130.53, 129.84, 129.45, 127.37, 127.10, 126.33, 126.10, 124.97, 124.26, 122.79, 121.60, 118.02, 117.64, 116.27.

**HRMS (ESI)**  $m/z$  Calcd for  $\text{C}_{20}\text{H}_{10}\text{Br}_2\text{NaOS}_2^+$  [ $\text{M} + \text{Na}$ ] $^+$ : 510.8432, Found: 510.8434.

**Optical Rotation:**  $[\alpha]_D^{25} = -101.0^\circ$  ( $c$  = 0.2, acetone).

**HPLC analysis:** Chiralcel IA-H (Hexane/*i*-PrOH = 90:10, flow rate = 1.0 mL/min, wave length = 254 nm),  $t_R$  = 11.180 min (minor),  $t_R$  = 16.563 min (major), 99% ee

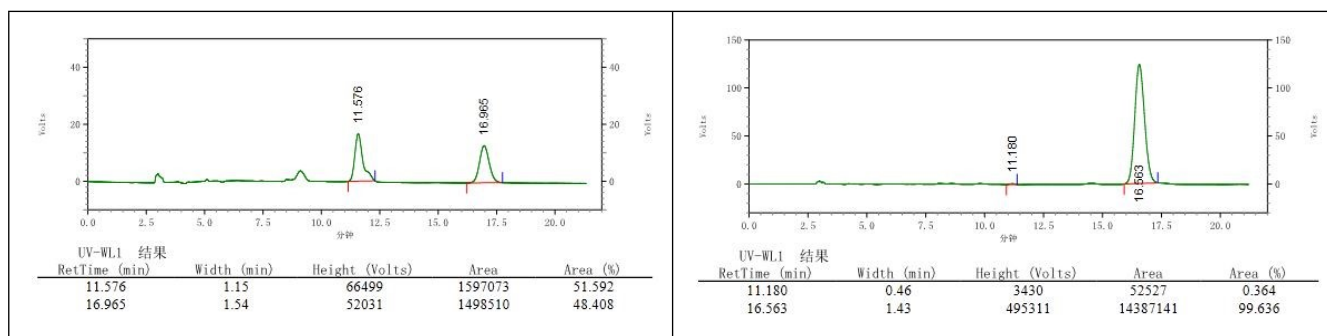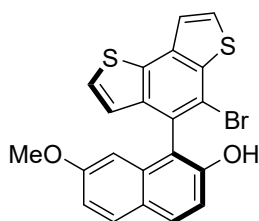

**(aS)-1-(5-bromobenzo[1,2-b:3,4-b']dithiophen-4-yl)-7-methoxynaphthalen-2-ol (2f)**

Compound **2f** was synthesized in 89% yield (117.5 mg, 0.3 mmol scale) under condition [A].

White solid. ( $R_f$  = 0.3, PE/EA = 5:1)

$^1\text{H NMR}$  (400 MHz,  $\text{CDCl}_3$ )  $\delta$  7.83 (d,  $J$  = 8.8 Hz, 1H), 7.80 – 7.63 (m, 3H), 7.30 (d,  $J$  = 5.4 Hz, 1H), 7.16 (d,  $J$  = 8.8 Hz, 1H), 6.99 (dd,  $J$  = 8.9, 2.2 Hz, 1H), 6.78 (d,  $J$  = 5.4 Hz, 1H), 6.36 (d,  $J$  = 2.0 Hz, 1H), 4.91 (s, 1H), 3.51 (s, 3H).

$^{13}\text{C NMR}$  (100 MHz,  $\text{CDCl}_3$ )  $\delta$  158.54, 151.39, 139.22, 138.66, 134.20, 134.10, 134.05, 130.29, 129.73, 129.09, 126.20, 125.66, 124.69, 124.31, 122.76, 117.49, 116.15, 115.37, 114.98, 103.75, 55.16.

**HRMS (ESI)  $m/z$**  Calcd for  $C_{21}H_{13}BrNaO_2S_2^+$   $[M + Na]^+$ : 462.9433, Found: 462.9433.

**Optical Rotation:**  $[\alpha]_D^{25} = -71.0^\circ$  ( $c = 0.2$ , acetone).

**HPLC analysis:** Chiralcel IA-H (Hexane/*i*-PrOH = 90:10, flow rate = 1.0 mL/min, wave length = 254 nm),  $t_R = 14.652$  min (minor),  $t_R = 23.736$  min (major), 98% ee

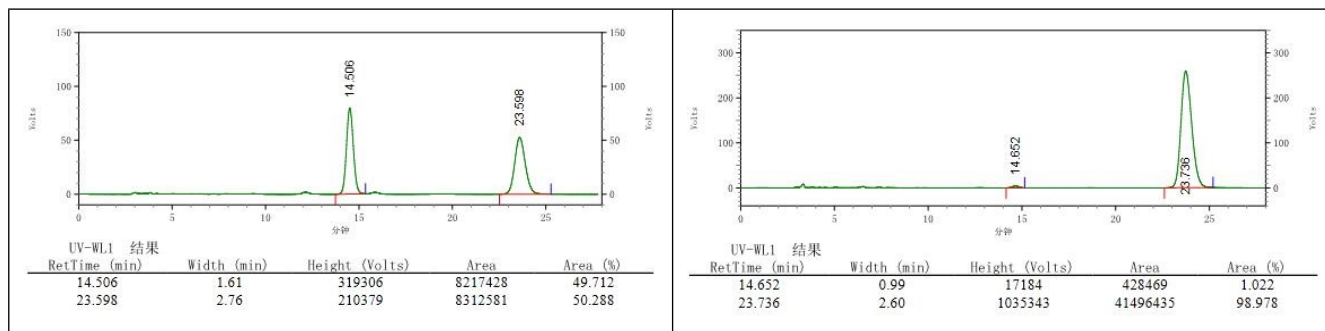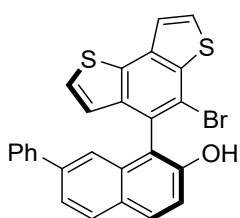

**(*aS*)-1-(5-bromobenzo[1,2-*b*:3,4-*b'*]dithiophen-4-yl)-7-phenylnaphthalen-2-ol (2g)**

Compound **2d** was synthesized in 88% yield (128.7 mg, 0.3 mmol scale) under condition [A].

White solid. ( $R_f = 0.3$ , PE/EA = 5:1)

**$^1H$  NMR** (400 MHz,  $CDCl_3$ )  $\delta$  7.96 (dd,  $J = 8.6, 3.7$  Hz, 2H), 7.82 – 7.72 (m, 2H), 7.60 (d,  $J = 7.9$  Hz, 1H), 7.40 (d,  $J = 7.4$  Hz, 2H), 7.36 – 7.28 (m, 4H), 7.25 (d,  $J = 3.1$  Hz, 2H), 6.81 (d,  $J = 5.4$  Hz, 1H), 4.90 (s, 1H).

**$^{13}C$  NMR** (100 MHz,  $CDCl_3$ )  $\delta$  151.21, 141.22, 139.80, 139.26, 138.75, 134.31, 134.22, 132.98, 130.35, 129.20, 128.72, 128.59, 128.15, 127.51, 127.22, 125.83, 124.61, 123.56, 122.81, 122.43, 118.56, 117.61, 116.25.

**HRMS (ESI)  $m/z$**  Calcd for  $C_{26}H_{15}BrNaOS_2^+$   $[M + Na]^+$ : 508.9640, Found: 508.9643.

**Optical Rotation:**  $[\alpha]_D^{25} = -54.5^\circ$  ( $c = 0.2$ , acetone).

**HPLC analysis:** Chiralcel IA-H (Hexane/*i*-PrOH = 90:10, flow rate = 1.0 mL/min, wave length = 254 nm),  $t_R = 17.013$  min (minor),  $t_R = 18.675$  min (major), 99% ee

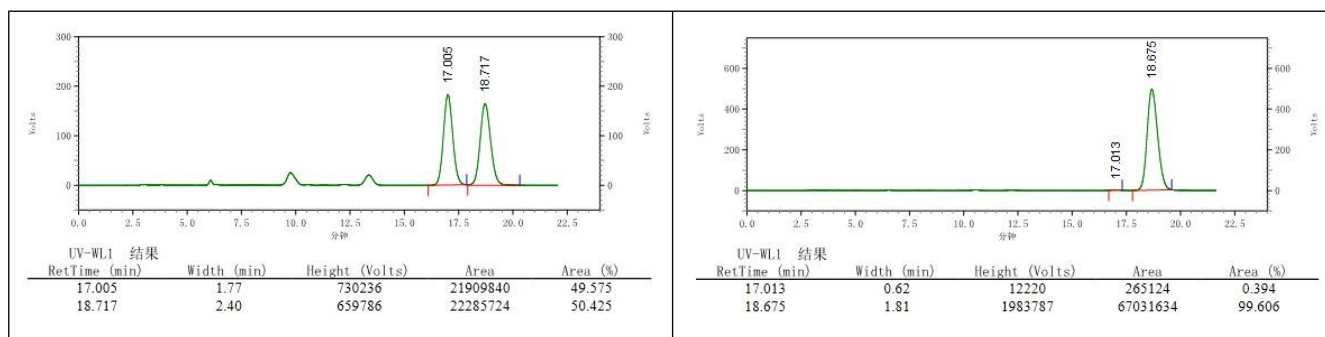

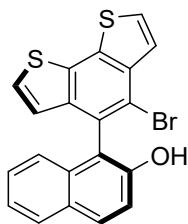

**(aS)-1-(5-bromobenzo[2,1-b:3,4-b']dithiophen-4-yl)naphthalen-2-ol (2h)**

Compound **2h** was synthesized in 89% yield (109.9 mg, 0.3 mmol scale) under condition [A].

White solid. ( $R_f$  = 0.3, PE/EA = 5:1)

$^1\text{H NMR}$  (400 MHz,  $\text{CDCl}_3$ )  $\delta$  7.88 (dd,  $J$  = 22.4, 8.5 Hz, 2H), 7.68 (d,  $J$  = 5.4 Hz, 1H), 7.50 (d,  $J$  = 5.3 Hz, 1H), 7.31 (d,  $J$  = 8.8 Hz, 2H), 7.27 – 7.21 (m, 2H), 7.06 (d,  $J$  = 8.3 Hz, 1H), 6.69 (d,  $J$  = 5.3 Hz, 1H), 4.92 (s, 1H).

$^{13}\text{C NMR}$  (100 MHz,  $\text{CDCl}_3$ )  $\delta$  150.62, 138.67, 137.49, 134.26, 133.29, 132.67, 130.45, 128.92, 128.15, 126.87, 126.54, 126.40, 125.73, 125.11, 124.83, 124.32, 123.58, 118.61, 118.26, 117.55.

**HRMS (ESI)**  $m/z$  Calcd for  $\text{C}_{20}\text{H}_{11}\text{BrNaOS}_2^+$  [ $M + \text{Na}$ ] $^+$ : 432.9327, Found: 432.9327.

**Optical Rotation:**  $[\alpha]_D^{25} = 4.8^\circ$  ( $c$  = 0.5, acetone).

**HPLC analysis:** Chiralcel IA-H (Hexane/*i*-PrOH = 90:10, flow rate = 1.0 mL/min, wave length = 254 nm),  $t_R$  = 10.201 min (minor),  $t_R$  = 17.425 min (major), 93% ee

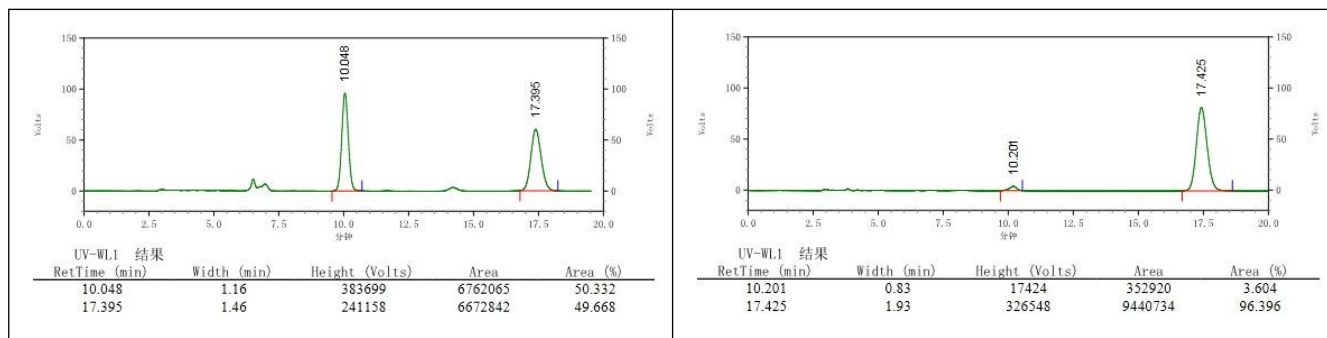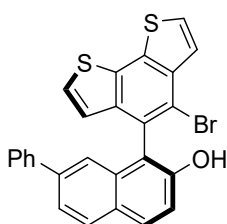

**(aS)-1-(5-bromobenzo[2,1-b:3,4-b']dithiophen-4-yl)-7-phenylnaphthalen-2-ol (2i)**

Compound **2i** was synthesized in 93% yield (136.0 mg, 0.3 mmol scale) under condition [A].

White solid. ( $R_f$  = 0.3, PE/EA = 5:1)

$^1\text{H NMR}$  (400 MHz,  $\text{CDCl}_3$ )  $\delta$  7.93 (d,  $J$  = 8.4 Hz, 2H), 7.68 (d,  $J$  = 4.8 Hz, 1H), 7.58 (d,  $J$  = 8.1 Hz, 1H), 7.49 (d,  $J$  = 4.9 Hz, 1H), 7.39 (d,  $J$  = 7.1 Hz, 2H), 7.34 – 7.18 (m, 6H), 6.75 (d,  $J$  = 4.8 Hz, 1H), 4.93 (s, 1H).

$^{13}\text{C NMR}$  (100 MHz,  $\text{CDCl}_3$ )  $\delta$  151.07, 141.16, 139.73, 138.61, 137.53, 134.35, 133.38, 132.92, 130.20, 128.71, 128.56, 128.13, 127.46, 127.17, 126.45, 126.38, 125.81, 125.09, 124.80, 123.50, 122.36, 118.92, 118.27, 117.62.

**HRMS (ESI)  $m/z$**  Calcd for  $C_{26}H_{15}BrNaOS_2^+ [M + Na]^+$ : 508.9640, Found: 508.9640.

**Optical Rotation:**  $[\alpha]_D^{25} = 11.8^\circ$  ( $c = 0.5$ , acetone).

**HPLC analysis:** Chiralcel IA-H (Hexane/*i*-PrOH = 90:10, flow rate = 1.0 mL/min, wave length = 254 nm),  $t_R = 12.938$  min (minor),  $t_R = 19.270$  min (major), 98% ee

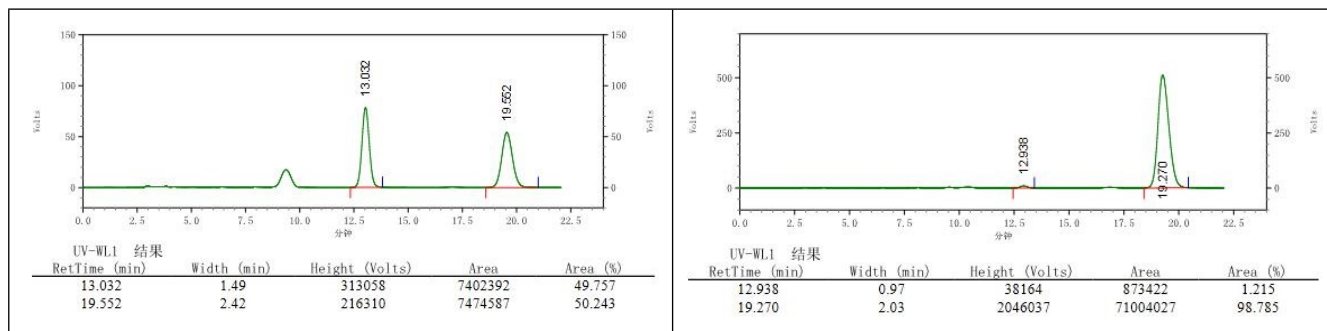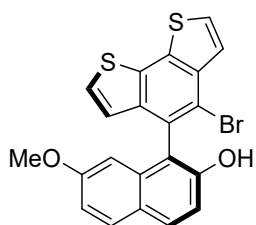

**(*aS*)-1-(5-bromobenzo[2,1-b:3,4-b']dithiophen-4-yl)-7-methoxynaphthalen-2-ol (2j)**

Compound **2j** was synthesized in 94% yield (124.5 mg, 0.3 mmol scale) under condition [A].

White solid. ( $R_f = 0.3$ , PE/EA = 5:1)

**$^1H$  NMR** (400 MHz,  $CDCl_3$ )  $\delta$  7.82 (d,  $J = 8.8$  Hz, 1H), 7.74 (d,  $J = 8.9$  Hz, 1H), 7.68 (d,  $J = 5.4$  Hz, 1H), 7.49 (d,  $J = 5.4$  Hz, 1H), 7.25 (d,  $J = 5.4$  Hz, 1H), 7.15 (d,  $J = 8.8$  Hz, 1H), 6.98 (dd,  $J = 8.9, 2.1$  Hz, 1H), 6.73 (d,  $J = 5.4$  Hz, 1H), 6.36 (d,  $J = 1.6$  Hz, 1H), 4.92 (s, 1H), 3.51 (s, 3H).

**$^{13}C$  NMR** (100 MHz,  $CDCl_3$ )  $\delta$  158.52, 151.27, 138.56, 137.54, 134.22, 134.05, 133.31, 130.17, 129.72, 126.73, 126.47, 125.68, 125.03, 124.92, 124.32, 118.20, 117.85, 115.36, 114.98, 103.68, 55.17.

**HRMS (ESI)  $m/z$**  Calcd for  $C_{28}H_{21}BrNaO^+ [M + Na]^+$ : 462.9433, Found: 462.9435.

**Optical Rotation:**  $[\alpha]_D^{25} = 48.0^\circ$  ( $c = 0.5$ , acetone).

**HPLC analysis:** Chiralcel IA-H (Hexane/*i*-PrOH = 90:10, flow rate = 1.0 mL/min, wave length = 254 nm),  $t_R = 11.747$  min (minor),  $t_R = 20.553$  min (major), 91% ee

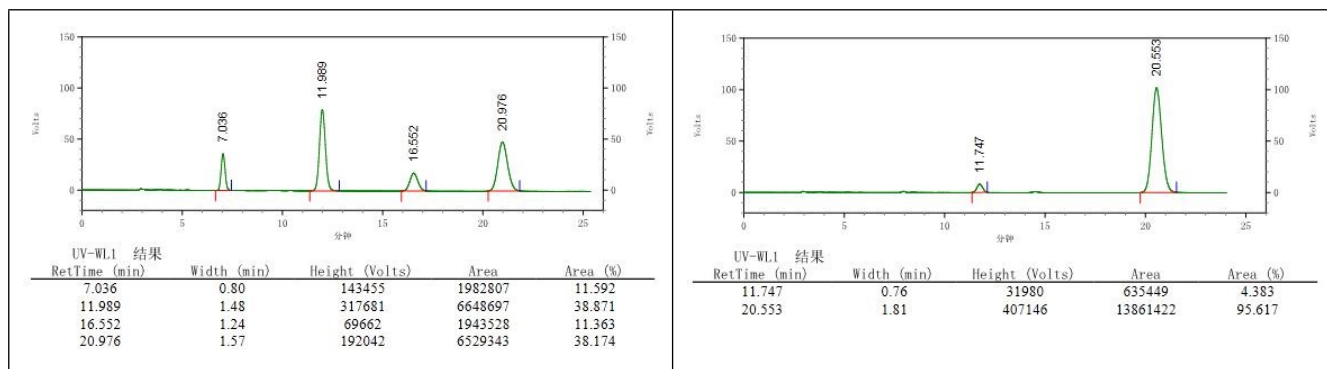



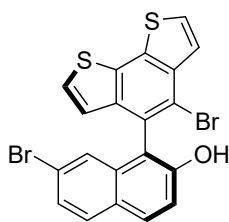

**(aS)-7-bromo-1-(5-bromobenzo[2,1-b:3,4-b']dithiophen-4-yl)naphthalen-2-ol (2k)**

Compound **2k** was synthesized in 92% yield (134.5 mg, 0.3 mmol scale) under condition [A].

White solid. ( $R_f = 0.3$ , PE/EA = 5:1)

$^1\text{H NMR}$  (400 MHz,  $\text{CDCl}_3$ )  $\delta$  7.87 (d,  $J = 8.9$  Hz, 1H), 7.71 (d,  $J = 8.7$  Hz, 1H), 7.68 (d,  $J = 5.5$  Hz, 1H), 7.53 (d,  $J = 5.4$  Hz, 1H), 7.41 (d,  $J = 8.6$  Hz, 1H), 7.32 (d,  $J = 8.9$  Hz, 1H), 7.28 (d,  $J = 5.4$  Hz, 1H), 7.22 (d,  $J = 5.5$  Hz, 1H), 6.68 (d,  $J = 5.4$  Hz, 1H), 4.99 (s, 1H).

$^{13}\text{C NMR}$  (100 MHz,  $\text{CDCl}_3$ )  $\delta$  151.52, 138.37, 137.48, 134.56, 133.98, 133.48, 130.38, 129.82, 127.35, 127.04, 126.38, 126.28, 126.06, 125.57, 125.28, 124.47, 121.56, 118.27, 118.03.

**HRMS (ESI)**  $m/z$  Calcd for  $\text{C}_{20}\text{H}_{10}\text{Br}_2\text{NaOS}_2^+$  [ $\text{M} + \text{Na}$ ] $^+$ : 510.8432, Found: 510.8432.

**Optical Rotation:**  $[\alpha]_D^{25} = 5.0^\circ$  ( $c = 0.5$ , acetone).

**HPLC analysis:** Chiralcel IA-H (Hexane/*i*-PrOH = 90:10, flow rate = 1.0 mL/min, wave length = 254 nm),  $t_R = 10.483$  min (minor),  $t_R = 17.864$  min (major), 98% ee

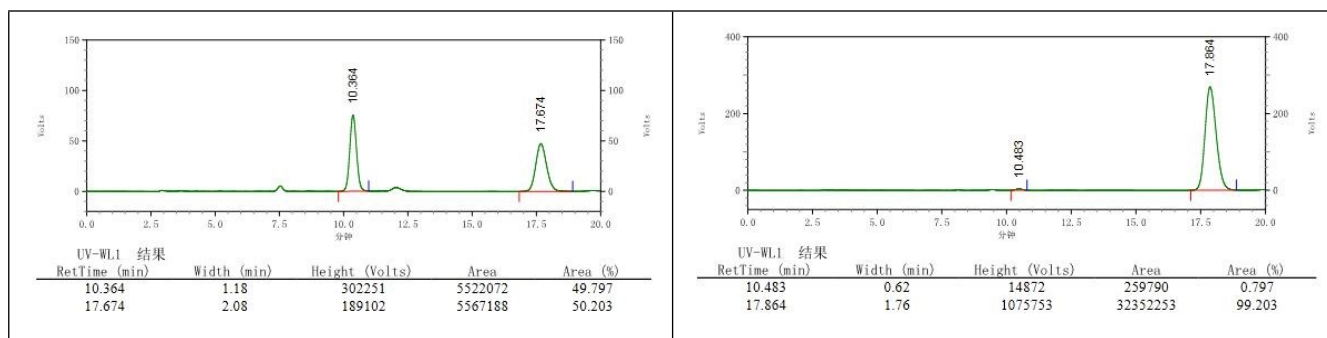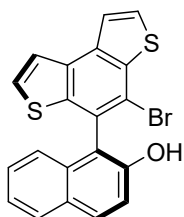

**(aS)-1-(5-bromobenzo[1,2-b:4,3-b']dithiophen-4-yl)naphthalen-2-ol (2l)**

Compound **2l** was synthesized in 76% yield (93.3 mg, 0.3 mmol scale) under condition [A].

White solid. ( $R_f = 0.3$ , PE/EA = 4:1)

$^1\text{H NMR}$  (400 MHz,  $\text{CDCl}_3$ )  $\delta$  7.94 (d,  $J = 8.7$  Hz, 1H), 7.91 – 7.80 (m, 2H), 7.73 (d,  $J = 4.6$  Hz, 1H), 7.70 (d,  $J = 4.6$  Hz, 1H), 7.48 (d,  $J = 4.5$  Hz, 1H), 7.41 – 7.23 (m, 3H), 7.10 (d,  $J = 7.9$  Hz, 1H), 4.98 (s, 1H).

$^{13}\text{C}$  NMR (100 MHz,  $\text{CDCl}_3$ )  $\delta$  150.71, 140.18, 139.81, 134.93, 134.07, 132.09, 131.08, 129.05, 128.51, 128.40, 128.27, 127.03, 125.02, 123.98, 123.74, 123.00, 122.10, 118.10, 117.68, 115.58.

**HRMS (ESI)**  $m/z$  Calcd for  $\text{C}_{20}\text{H}_{11}\text{BrNaOS}_2^+$  [ $\text{M} + \text{Na}$ ] $^+$ : 432.9327, Found: 432.9328.

**Optical Rotation:**  $[\alpha]_D^{25} = 4.8^\circ$  ( $c = 0.5$ , acetone).

**HPLC analysis:** Chiralcel AS-H (Hexane/*i*-PrOH = 80:20, flow rate = 1.0 mL/min, wave length = 254 nm),  $t_R = 11.019$  min (major),  $t_R = 14.383$  min (minor), 97% ee

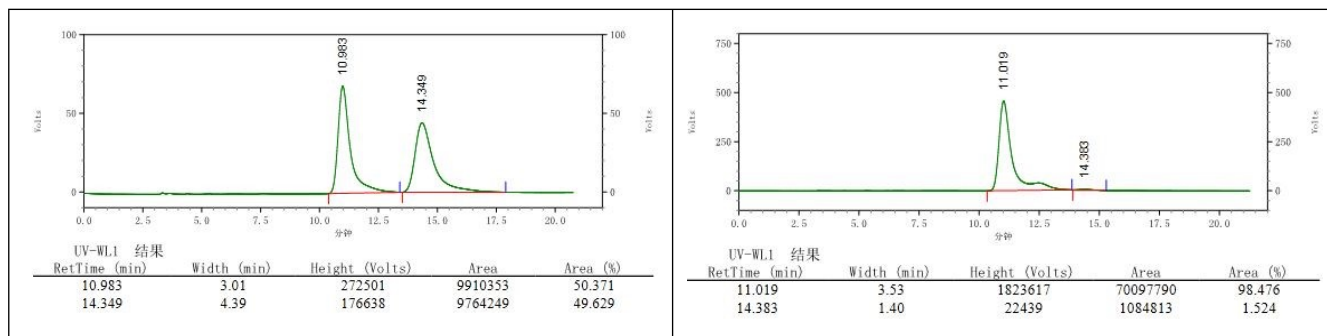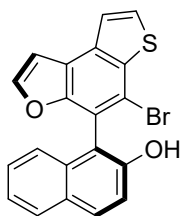

### (*aS*)-1-(5-bromothieno[3,2-*e*]benzofuran-4-yl)naphthalen-2-ol (2m)

Compound **2m** was synthesized in 97% yield (114.7 mg, 0.3 mmol scale) under condition [A].

White solid. ( $R_f = 0.3$ , PE/EA = 5:1)

$^1\text{H}$  NMR (400 MHz,  $\text{CDCl}_3$ )  $\delta$  7.96 (d,  $J = 8.9$  Hz, 1H), 7.88 (d,  $J = 8.0$  Hz, 1H), 7.80 (d,  $J = 5.5$  Hz, 1H), 7.75 (d,  $J = 5.5$  Hz, 1H), 7.62 (d,  $J = 2.0$  Hz, 1H), 7.35 (q,  $J = 8.7$  Hz, 2H), 7.30 (t,  $J = 7.1$  Hz, 1H), 7.14 (d,  $J = 2.0$  Hz, 1H), 7.10 (d,  $J = 8.3$  Hz, 1H), 4.95 (s, 1H).

$^{13}\text{C}$  NMR (100 MHz,  $\text{CDCl}_3$ )  $\delta$  151.97, 151.20, 145.79, 138.22, 132.85, 132.77, 130.98, 129.12, 128.95, 128.28, 126.94, 124.16, 123.64, 122.76, 121.92, 117.59, 116.69, 114.81, 114.53, 105.71.

**HRMS (ESI)**  $m/z$  Calcd for  $\text{C}_{26}\text{H}_{15}\text{BrNaO}_2\text{S}^+$  [ $\text{M} + \text{Na}$ ] $^+$ : 416.9555, Found: 416.9557.

**Optical Rotation:**  $[\alpha]_D^{25} = -59.0^\circ$  ( $c = 0.3$ , acetone).

**HPLC analysis:** Chiralcel IA-H (Hexane/*i*-PrOH = 85:15, flow rate = 1.0 mL/min, wave length = 254 nm),  $t_R = 12.337$  min (minor),  $t_R = 14.200$  min (major), 96% ee

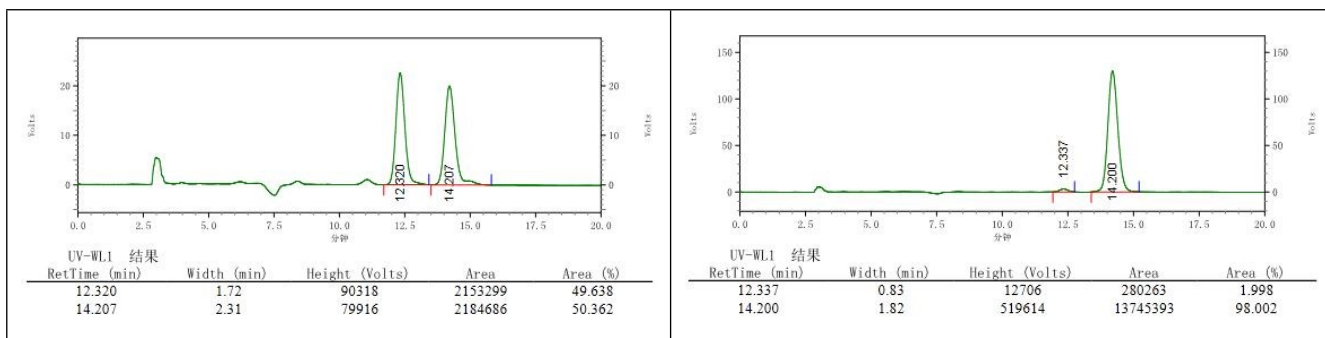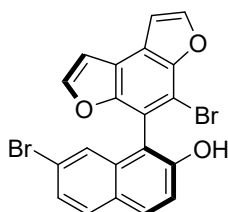

**(aS)-7-bromo-1-(5-bromobenzo[1,2-b:4,3-b']difuran-4-yl)naphthalen-2-ol (2n)**

Compound **2n** was synthesized in 90% yield (123.0 mg, 0.3 mmol scale) under condition [A].

White solid. ( $R_f$  = 0.4, PE/EA = 5:1)

$^1\text{H NMR}$  (400 MHz,  $\text{CDCl}_3$ )  $\delta$  7.88 (s, 2H), 7.71 (d,  $J$  = 8.4 Hz, 1H), 7.61 (s, 1H), 7.41 (d,  $J$  = 8.2 Hz, 1H), 7.33 (d,  $J$  = 8.7 Hz, 1H), 7.23 (s, 1H), 7.14 (s, 1H), 7.02 (s, 1H), 5.10 (s, 1H).

$^{13}\text{C NMR}$  (100 MHz,  $\text{CDCl}_3$ )  $\delta$  152.09, 150.51, 149.47, 146.57, 146.39, 134.25, 130.84, 129.90, 127.40, 127.03, 126.17, 121.57, 121.05, 119.84, 118.03, 114.48, 113.50, 106.66, 105.84, 104.26.

**HRMS (ESI)**  $m/z$  Calcd for  $\text{C}_{20}\text{H}_{10}\text{Br}_2\text{NaO}_3^+$  [ $\text{M} + \text{Na}$ ] $^+$ : 478.8889, Found: 478.8886.

**Optical Rotation:**  $[\alpha]_D^{25} = -23.8^\circ$  ( $c$  = 0.5, acetone).

**HPLC analysis:** Chiralcel IA-H (Hexane/*i*-PrOH = 85:15, flow rate = 1.0 mL/min, wave length = 254 nm),  $t_R$  = 12.167 min (major),  $t_R$  = 13.200 min (minor), 93% ee

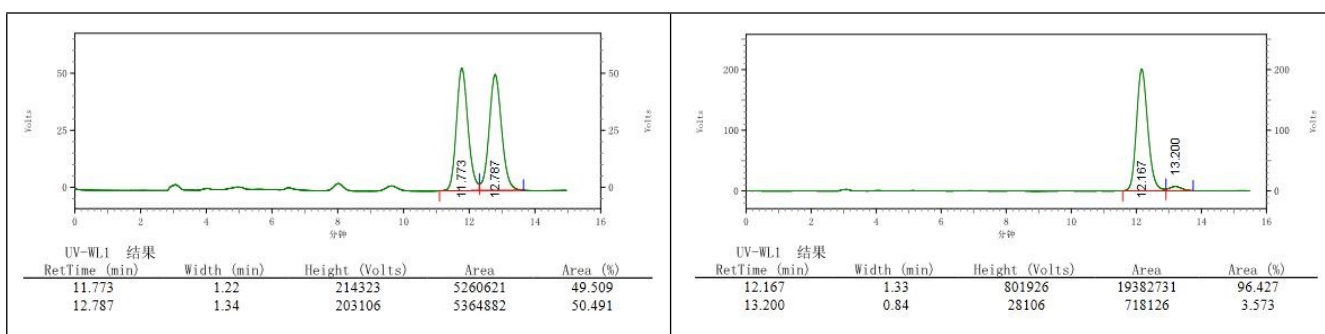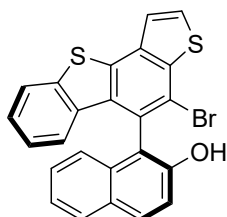

**(aS)-1-(4-bromobenzo[b]thieno[2,3-g]benzothiophene-5-yl)naphthalen-2-ol (2o)**

Compound **2o** was synthesized in 88% yield (121.4 mg, 0.3 mmol scale) under condition [A].

Yellow solid. ( $R_f = 0.4$ , PE/EA = 5:1)

$^1\text{H NMR}$  (400 MHz,  $\text{CDCl}_3$ )  $\delta$  8.04 (d,  $J = 8.9$  Hz, 1H), 7.92 (d,  $J = 8.2$  Hz, 1H), 7.83 (d,  $J = 8.0$  Hz, 1H), 7.80 – 7.74 (m, 2H), 7.39 (d,  $J = 8.9$  Hz, 1H), 7.34 (t,  $J = 7.5$  Hz, 1H), 7.29 (d,  $J = 7.5$  Hz, 1H), 7.25 (d,  $J = 6.9$  Hz, 1H), 7.21 (d,  $J = 7.2$  Hz, 1H), 7.10 (d,  $J = 8.4$  Hz, 1H), 6.92 (t,  $J = 7.8$  Hz, 1H), 6.53 (d,  $J = 8.3$  Hz, 1H), 4.91 (s, 1H).

$^{13}\text{C NMR}$  (100 MHz,  $\text{CDCl}_3$ )  $\delta$  150.67, 140.81, 138.91, 135.18, 134.80, 134.29, 132.63, 132.54, 130.95, 129.57, 129.10, 128.25, 127.26, 126.42, 126.31, 124.93, 123.96, 123.89, 123.79, 123.10, 122.61, 118.41, 117.72, 117.22.

**HRMS (ESI)**  $m/z$  Calcd for  $\text{C}_{24}\text{H}_{13}\text{BrNaOS}_2^+$  [ $\text{M} + \text{Na}$ ] $^+$ : 482.9483, Found: 482.9485.

**Optical Rotation:**  $[\alpha]_D^{25} = -44.5^\circ$  ( $c = 0.6$ , acetone).

**HPLC analysis:** Chiralcel IA-H (Hexane/*i*-PrOH = 85:15, flow rate = 1.0 mL/min, wave length = 254 nm),  $t_R = 9.560$  min (minor),  $t_R = 11.943$  min (major), 98% ee

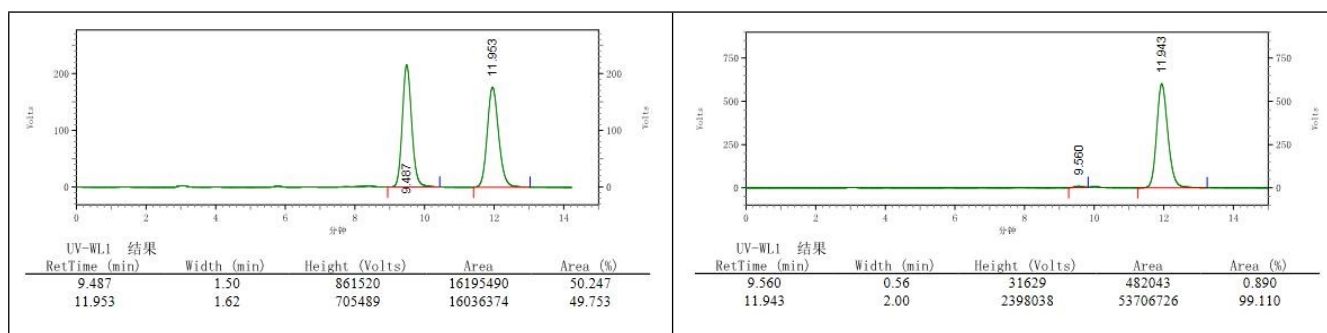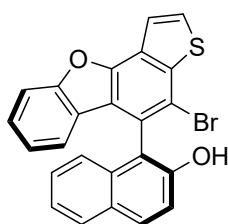

### (*aS*)-1-(4-bromobenzo[b]thieno[2,3-g]benzofuran-5-yl)naphthalen-2-ol (**2p**)

Compound **2p** was synthesized in 90% yield (120.0 mg, 0.3 mmol scale) under condition [A].

Brown solid. ( $R_f = 0.5$ , PE/EA = 4:1)

$^1\text{H NMR}$  (400 MHz,  $\text{CDCl}_3$ )  $\delta$  8.02 (d,  $J = 8.9$  Hz, 1H), 7.93 (dd,  $J = 14.8, 6.8$  Hz, 2H), 7.70 (d,  $J = 5.5$  Hz, 1H), 7.58 (d,  $J = 8.3$  Hz, 1H), 7.39 (d,  $J = 8.9$  Hz, 1H), 7.36 – 7.28 (m, 2H), 7.23 (t,  $J = 3.3$  Hz, 1H), 7.14 (d,  $J = 8.5$  Hz, 1H), 6.91 (t,  $J = 7.6$  Hz, 1H), 6.38 (d,  $J = 7.8$  Hz, 1H), 5.01 (s, 1H).

$^{13}\text{C NMR}$  (100 MHz,  $\text{CDCl}_3$ )  $\delta$  155.83, 150.68, 150.07, 142.42, 132.44, 130.91, 129.03, 128.97, 128.25, 127.18, 126.87, 125.93, 124.88, 124.00, 123.84, 123.56, 123.33, 121.32, 121.18, 120.53, 117.65, 117.09, 113.15, 111.50.

**HRMS (ESI)**  $m/z$  Calcd for  $\text{C}_{24}\text{H}_{13}\text{BrNaO}_2\text{S}^+$  [ $\text{M} + \text{Na}$ ] $^+$ : 466.9712, Found: 466.9716.

**Optical Rotation:**  $[\alpha]_D^{25} = -7.0^\circ$  ( $c = 0.2$ , acetone).

**HPLC analysis:** Chiralcel IA-H (Hexane/*i*-PrOH = 85:15, flow rate = 1.0 mL/min, wave length = 254 nm),  $t_R = 7.603$  min (minor),  $t_R = 10.400$  min (major), 90% ee

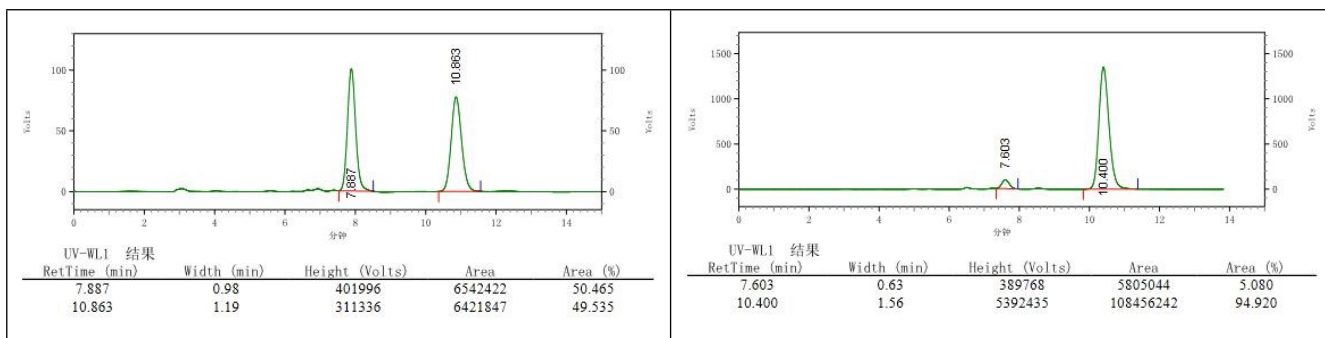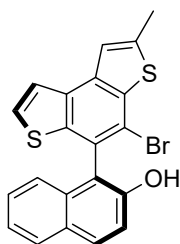

**(aS)-1-(5-bromo-7-methylbenzo[1,2-b:4,3-b']dithiophen-4-yl)naphthalen-2-ol (2q)**

Compound **2q** was synthesized in 92% yield (98.2 mg, 0.25 mmol scale) under condition [A].

Yellow solid. ( $R_f$  = 0.4, PE/EA = 5:1)

$^1\text{H NMR}$  (400 MHz,  $\text{CDCl}_3$ )  $\delta$  7.93 (d,  $J$  = 8.9 Hz, 1H), 7.86 (d,  $J$  = 8.1 Hz, 1H), 7.65 (d, 3.6Hz, 1H), 7.53 (s, 1H), 7.43 (d,  $J$  = 5.5 Hz, 1H), 7.37 – 7.22 (m, 3H), 7.10 (d,  $J$  = 8.5 Hz, 1H), 4.92 (s, 1H), 2.71 (s, 3H).

$^{13}\text{C NMR}$  (100 MHz,  $\text{CDCl}_3$ )  $\delta$  150.78, 143.62, 140.13, 139.00, 135.59, 133.41, 132.19, 130.99, 129.09, 128.25, 128.00, 126.97, 124.05, 123.69, 122.03, 120.95, 118.24, 117.64, 115.17, 16.31.

**HRMS (ESI)**  $m/z$  Calcd for  $\text{C}_{21}\text{H}_{13}\text{BrNaOS}_2^+$  [ $M + \text{Na}$ ] $^+$ : 446.9483, Found: 446.9484.

**Optical Rotation:**  $[\alpha]_D^{25} = -49.8^\circ$  ( $c$  = 0.5, acetone).

**HPLC analysis:** Chiralcel OD-H (Hexane/*i*-PrOH = 80:20, flow rate = 1.0 mL/min, wave length = 254 nm),  $t_R$  = 9.643 min (minor),  $t_R$  = 18.527 min (major), 89% ee

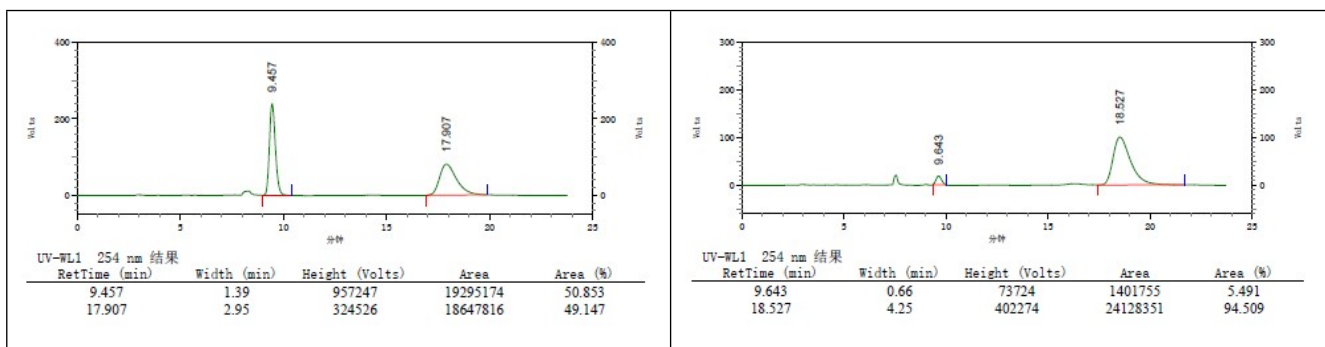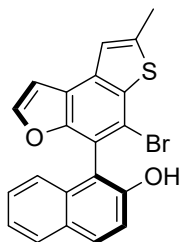

**(aS)-1-(5-bromo-7-methylthieno[3,2-e]benzofuran-4-yl)naphthalen-2-ol (2r)**

Compound **2r** was synthesized in 94% yield (77.2 mg, 0.2 mmol scale) under condition [A].

Pale yellow solid. ( $R_f = 0.4$ , PE/EA = 5:1)

$^1\text{H NMR}$  (400 MHz,  $\text{CDCl}_3$ )  $\delta$  7.93 (d,  $J = 8.9$  Hz, 1H), 7.86 (d,  $J = 8.0$  Hz, 1H), 7.56 (s, 1H), 7.43 (s, 1H), 7.33 (d,  $J = 9.0$  Hz, 2H), 7.29 (t,  $J = 7.5$  Hz, 1H), 7.10 (d,  $J = 8.3$  Hz, 1H), 7.03 (s, 1H), 4.92 (s, 1H), 2.71 (s, 3H).

$^{13}\text{C NMR}$  (100 MHz,  $\text{CDCl}_3$ )  $\delta$  152.05, 151.22, 145.59, 144.25, 137.40, 133.42, 132.94, 130.89, 128.98, 128.26, 126.88, 124.22, 123.59, 121.22, 120.70, 117.53, 115.29, 114.63, 114.33, 105.59, 16.36.

**HRMS (ESI)**  $m/z$  Calcd for  $\text{C}_{21}\text{H}_{13}\text{BrNaO}_2\text{S}^+$  [ $\text{M} + \text{Na}$ ] $^+$ : 430.9712, Found: 430.9714.

**Optical Rotation:**  $[\alpha]_D^{25} = -29.7^\circ$  ( $c = 0.3$ , acetone).

**HPLC analysis:** Chiralcel AD-H (Hexane/*i*-PrOH = 80:20, flow rate = 1.0 mL/min, wave length = 254 nm),  $t_R = 11.817$  min (minor),  $t_R = 14.967$  min (major), 95% ee

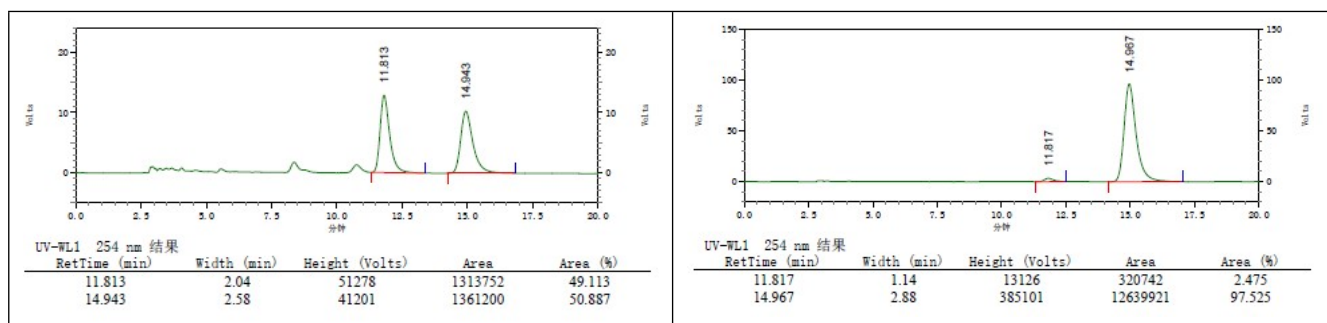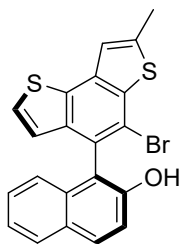

**(aS)-1-(5-bromo-7-methylbenzo[1,2-b:3,4-b']dithiophen-4-yl)naphthalen-2-ol (2s)**

Compound **2s** was synthesized in 95% yield (81.2 mg, 0.2 mmol scale) under condition [A].

White solid. ( $R_f = 0.4$ , PE/EA = 5:1)

$^1\text{H NMR}$  (400 MHz,  $\text{CDCl}_3$ )  $\delta$  7.91 (d,  $J = 8.8$  Hz, 1H), 7.85 (d,  $J = 8.0$  Hz, 1H), 7.42 (s, 1H), 7.36 – 7.29 (m, 2H), 7.28 – 7.21 (m, 2H), 7.07 (d,  $J = 8.3$  Hz, 1H), 6.71 (d,  $J = 5.2$  Hz, 1H), 4.88 (s, 1H), 2.70 (s, 3H).

$^{13}\text{C NMR}$  (100 MHz,  $\text{CDCl}_3$ )  $\delta$  150.81, 144.32, 138.74, 138.35, 134.68, 133.22, 132.84, 130.49, 128.94, 128.13, 126.85, 125.57, 124.78, 124.55, 124.43, 123.55, 120.65, 118.38, 117.50, 115.78, 16.29.

**HRMS (ESI)**  $m/z$  Calcd for  $\text{C}_{21}\text{H}_{13}\text{BrNaOS}_2^+$  [ $\text{M} + \text{Na}$ ] $^+$ : 446.9483, Found: 446.9483.

**Optical Rotation:**  $[\alpha]_D^{25} = -43.3^\circ$  ( $c = 1.0$ , acetone).

**HPLC analysis:** Chiralcel AD-H (Hexane/*i*-PrOH = 80:20, flow rate = 1.0 mL/min, wave length = 254 nm),  $t_R = 8.287$  min (minor),  $t_R = 15.163$  min (major), 97% ee

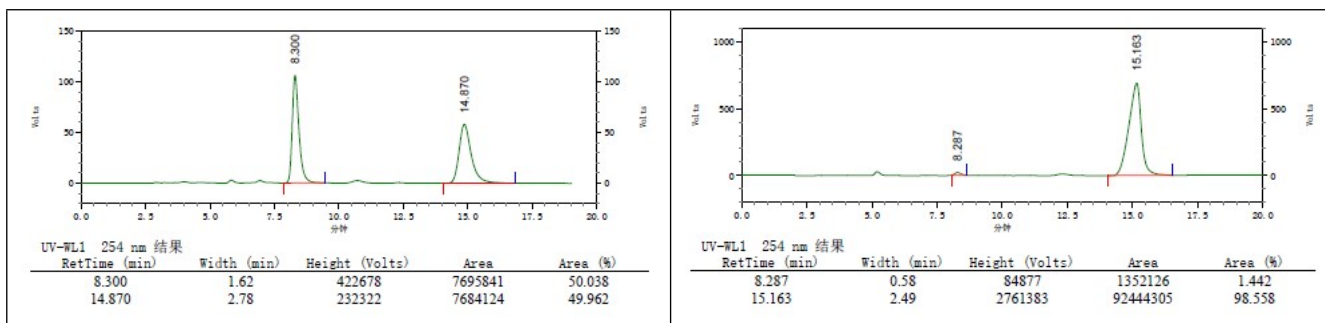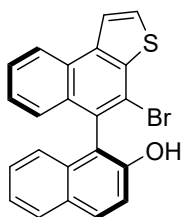

**(aS)-1-(4-bromonaphtho[2,1-b]thiophen-5-yl)naphthalen-2-ol (2t)**

Compound **2t** was synthesized in 90% yield (109.1 mg, 0.3 mmol scale) under condition [A].

White solid. ( $R_f = 0.4$ , PE/EA = 5:1)

<sup>1</sup>H NMR (400 MHz, CDCl<sub>3</sub>)  $\delta$  8.39 (d,  $J = 8.2$  Hz, 1H), 8.16 (d,  $J = 4.9$  Hz, 1H), 7.95 (d,  $J = 8.9$  Hz, 1H), 7.88 (d,  $J = 8.1$  Hz, 1H), 7.72 (d,  $J = 5.4$  Hz, 1H), 7.61 (dt,  $J = 5.7, 2.8$  Hz, 1H), 7.38 – 7.29 (m, 4H), 7.22 (t,  $J = 7.6$  Hz, 2H), 7.00 (d,  $J = 8.4$  Hz, 1H), 4.86 (s, 1H).

<sup>13</sup>C NMR (100 MHz, CDCl<sub>3</sub>)  $\delta$  151.02, 139.96, 137.17, 133.15, 131.63, 130.56, 129.00, 128.85, 128.53, 128.17, 127.91, 127.21, 126.99, 126.93, 126.74, 124.39, 124.02, 123.62, 123.07, 118.99, 118.07, 117.60.

HRMS (ESI)  $m/z$  Calcd for C<sub>22</sub>H<sub>13</sub>BrNaOS<sup>+</sup> [M + Na]<sup>+</sup>: 426.9763, Found: 426.9765.

Optical Rotation:  $[\alpha]_D^{25} = -43.6^\circ$  ( $c = 1.0$ , acetone).

HPLC analysis: Chiralcel IA-H (Hexane/*i*-PrOH = 80:20, flow rate = 1.0 mL/min, wave length = 254 nm),  $t_R = 7.827$  min (minor),  $t_R = 11.787$  min (major), 95% ee

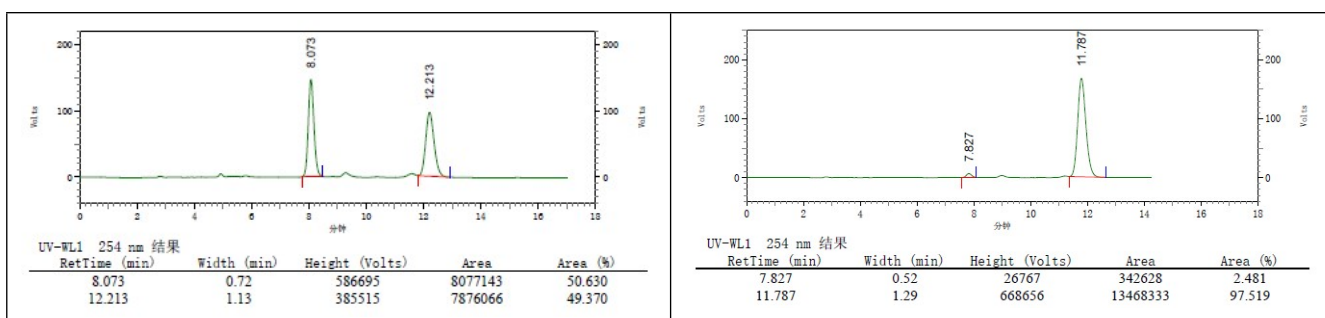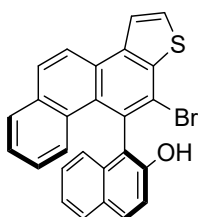

**(aR)-1-(11-bromophenanthro[2,1-b]thiophen-10-yl)naphthalen-2-ol (2u)**

Compound **2u** was synthesized in 67% yield (92.0 mg, 0.3 mmol scale) under condition [A].

Pale yellow solid. ( $R_f = 0.4$ , PE/EA = 6:1)

$^1\text{H NMR}$  (400 MHz,  $\text{CDCl}_3$ )  $\delta$  8.40 (d,  $J = 8.9$  Hz, 1H), 8.24 (d,  $J = 5.5$  Hz, 1H), 8.02 (d,  $J = 8.9$  Hz, 1H), 7.97 (d,  $J = 8.9$  Hz, 1H), 7.91 (d,  $J = 8.2$  Hz, 1H), 7.84 (d,  $J = 7.6$  Hz, 1H), 7.76 (d,  $J = 5.5$  Hz, 1H), 7.68 (d,  $J = 8.9$  Hz, 1H), 7.40 – 7.28 (m, 3H), 7.19 (t,  $J = 7.4$  Hz, 1H), 7.12 (d,  $J = 8.4$  Hz, 1H), 6.96 (q,  $J = 8.1$  Hz, 1H), 4.84 (s, 1H).

$^{13}\text{C NMR}$  (100 MHz,  $\text{CDCl}_3$ )  $\delta$  150.23, 141.26, 137.91, 132.85, 132.82, 130.63, 130.46, 129.42, 129.40, 128.79, 128.50, 128.37, 128.24, 127.64, 127.21, 126.74, 126.31, 125.75, 124.17, 123.94, 123.58, 123.12, 122.75, 121.61, 117.91, 109.98.

**HRMS (ESI)**  $m/z$  Calcd for  $\text{C}_{26}\text{H}_{15}\text{BrNaOS}^+ [\text{M} + \text{Na}]^+$ : 476.9919, Found: 476.9916.

**Optical Rotation:**  $[\alpha]_D^{25} = 10.4^\circ$  ( $c = 1.0$ , acetone).

**HPLC analysis:** Chiralcel IA-H (Hexane/*i*-PrOH = 80:20, flow rate = 1.0 mL/min, wave length = 254 nm),  $t_R = 9.213$  min (minor),  $t_R = 10.737$  min (major), 90% ee

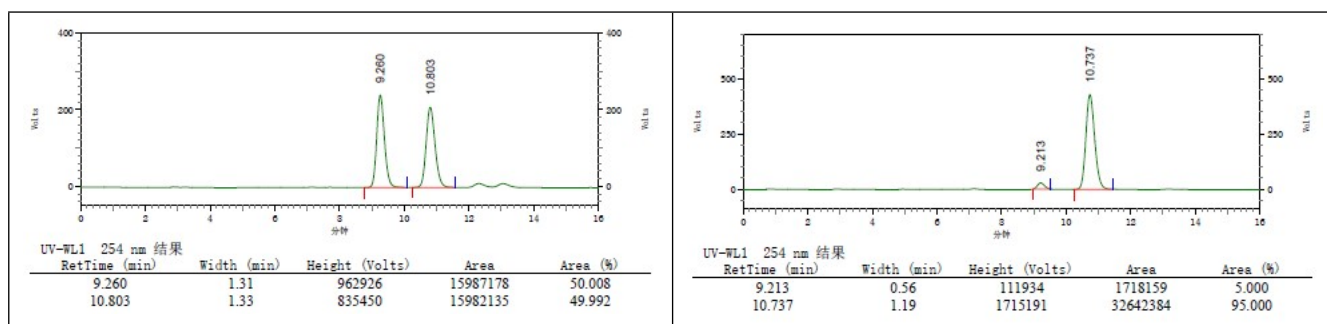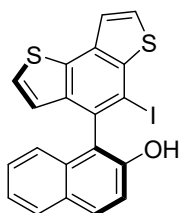

### (*aS*)-1-(5-iodobenzo[1,2-*b*:3,4-*b'*]dithiophen-4-yl)naphthalen-2-ol (**2v**)

Compound **2v** was synthesized in 92% yield (84.2 mg, 0.2 mmol scale).

White solid. ( $R_f = 0.5$ , PE/EA = 6:1)

$^1\text{H NMR}$  (400 MHz,  $\text{CDCl}_3$ )  $\delta$  7.99 – 7.87 (m, 2H), 7.85 (d,  $J = 8.1$  Hz, 1H), 7.69 (d,  $J = 5.6$  Hz, 1H), 7.37 – 7.28 (m, 2H), 7.26 – 7.15 (m, 2H), 7.02 (d,  $J = 8.4$  Hz, 1H), 6.71 (d,  $J = 4.8$  Hz, 1H), 4.88 (s, 1H).

$^{13}\text{C NMR}$  (100 MHz,  $\text{CDCl}_3$ )  $\delta$  150.47, 143.84, 138.19, 135.28, 132.85, 132.61, 131.06, 130.56, 128.91, 128.54, 128.12, 126.90, 125.50, 124.94, 124.36, 123.62, 123.19, 121.83, 117.59, 91.99.

**HRMS (ESI)**  $m/z$  Calcd for  $\text{C}_{20}\text{H}_{11}\text{INaOS}_2^+ [\text{M} + \text{Na}]^+$ : 480.9188, Found: 480.9185.

**HPLC analysis:** Chiralcel IA-H (Hexane/*i*-PrOH = 80:20, flow rate = 1.0 mL/min, wave length = 254 nm),  $t_R = 9.507$  min (minor),  $t_R = 12.223$  min (major), 16% ee



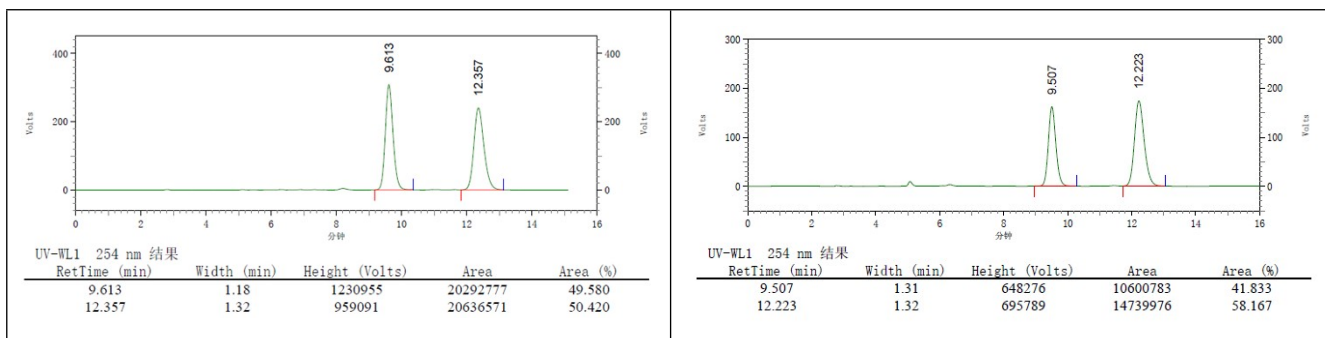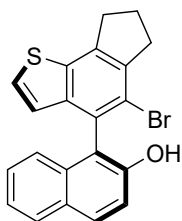

**(aS)-1-(5-bromo-7,8-dihydro-6H-indeno[4,5-b]thiophen-4-yl)naphthalen-2-ol (2w)**

Compound **2w** was synthesized in 90% yield (106.6 mg, 0.3 mmol scale) under condition [A].

White solid. ( $R_f$  = 0.5, PE/EA = 4:1)

<sup>1</sup>H NMR (400 MHz, CDCl<sub>3</sub>) δ 7.89 (d,  $J$  = 8.9 Hz, 1H), 7.84 (d,  $J$  = 7.9 Hz, 1H), 7.38 – 7.20 (m, 4H), 7.08 (d,  $J$  = 8.2 Hz, 1H), 6.65 (d,  $J$  = 5.6 Hz, 1H), 4.89 (s, 1H), 3.31 (td,  $J$  = 7.6, 3.5 Hz, 2H), 3.21 (q,  $J$  = 10.0, 8.7 Hz, 2H), 2.34 (p,  $J$  = 7.6 Hz, 2H).

<sup>13</sup>C NMR (100 MHz, CDCl<sub>3</sub>) δ 150.52, 141.48, 140.74, 138.98, 135.48, 132.74, 130.19, 128.90, 128.10, 127.20, 127.08, 126.70, 124.40, 124.18, 123.45, 120.61, 118.86, 117.45, 35.83, 33.84, 24.00.

HRMS (ESI)  $m/z$  Calcd for C<sub>21</sub>H<sub>15</sub>BrNaOS<sup>+</sup> [M + Na]<sup>+</sup>: 416.9919, Found: 416.9919.

**HPLC analysis:** Chiralcel IA-H (Hexane/*i*-PrOH = 90:10, flow rate = 1.0 mL/min, wave length = 254 nm),  $t_R$  = 8.089 min (minor),  $t_R$  = 16.144 min (major), 71% ee. Racemic reference sample for chiral HPLC analysis were prepared following the general method using 5 mol% of (R)- and (S)-catalyst A.

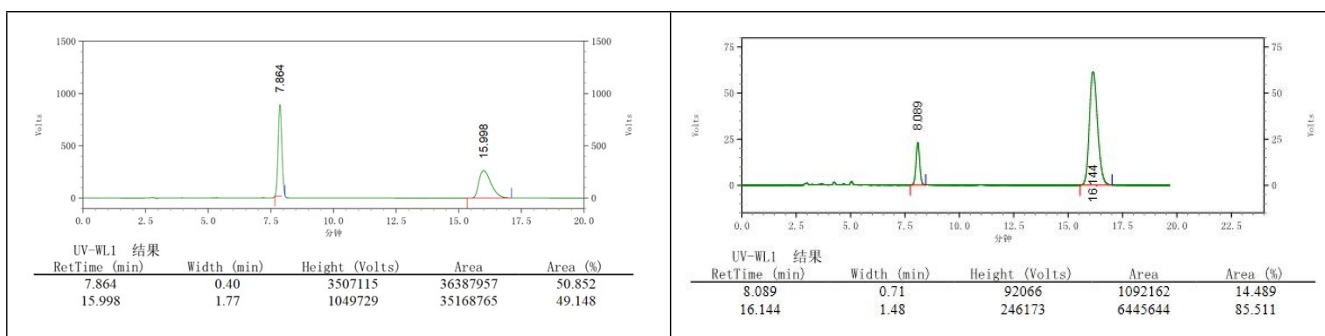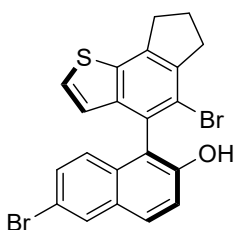

**(aS)-6-bromo-1-(5-bromo-7,8-dihydro-6H-indeno[4,5-b]thiophen-4-yl)naphthalen-2-ol (2x)**

Compound **2x** was synthesized in 89% yield (126.6 mg, 0.3 mmol scale) under condition [A].

White solid. ( $R_f = 0.5$ , PE/EA = 4:1)

$^1\text{H NMR}$  (400 MHz,  $\text{CDCl}_3$ )  $\delta$  7.99 (d,  $J = 1.6$  Hz, 1H), 7.79 (d,  $J = 8.9$  Hz, 1H), 7.32 (d,  $J = 8.9$  Hz, 2H), 7.27 (d,  $J = 5.5$  Hz, 1H), 6.95 (d,  $J = 9.0$  Hz, 1H), 6.62 (d,  $J = 5.5$  Hz, 1H), 4.92 (s, 1H), 3.36 – 3.26 (m, 2H), 3.25 – 3.17 (m, 2H), 2.34 (p,  $J = 7.4$  Hz, 2H).

$^{13}\text{C NMR}$  (100 MHz,  $\text{CDCl}_3$ )  $\delta$  150.87, 141.54, 140.60, 139.28, 135.59, 131.30, 130.04, 129.92, 129.25, 127.40, 126.46, 126.28, 123.87, 120.52, 119.09, 118.65, 117.25, 35.81, 33.85, 23.98.

**HRMS (ESI)**  $m/z$  Calcd for  $\text{C}_{21}\text{H}_{14}\text{Br}_2\text{NaOS}^+ [\text{M} + \text{Na}]^+$ : 494.9024, Found: 494.9024.

**HPLC analysis:** Chiralcel IA-H (Hexane/*i*-PrOH = 90:10, flow rate = 1.0 mL/min, wave length = 254 nm),  $t_R = 8.263$  min (minor),  $t_R = 17.052$  min (major), 70% ee

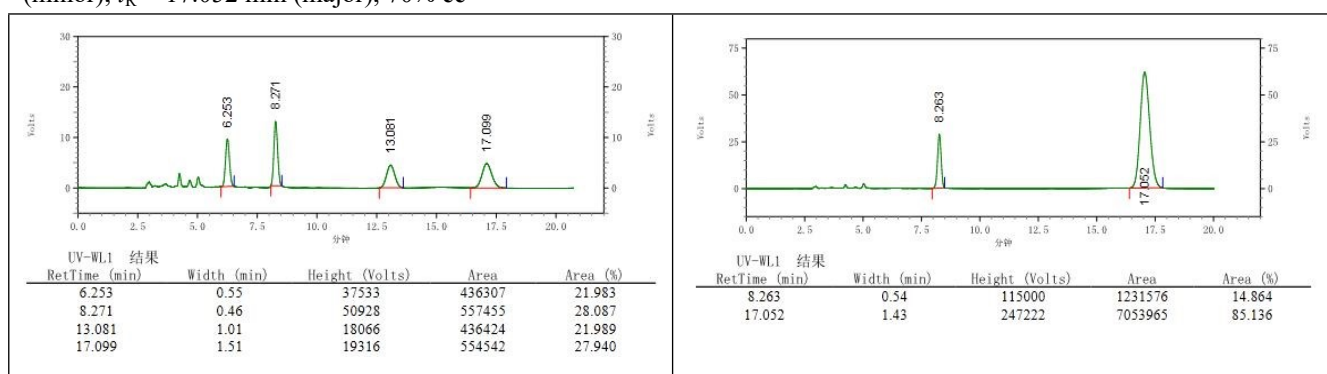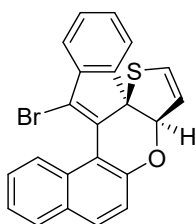

**(4bR,7aR)-15-bromo-7aH-benzo[f]indeno[1,2-c]thieno[3,2-b]chromene (4a)**

Compound **4a** was synthesized in 89% yield (107.6 mg, 0.3 mmol scale) under condition [A].

White solid. ( $R_f = 0.5$ , PE/EA = 20:1)

$^1\text{H NMR}$  (400 MHz,  $\text{CDCl}_3$ )  $\delta$  7.97 (d,  $J = 8.4$  Hz, 1H), 7.79 (t,  $J = 9.5$  Hz, 2H), 7.53 (t,  $J = 8.6$  Hz, 3H), 7.47 (t,  $J = 7.5$  Hz, 1H), 7.40 (t,  $J = 7.2$  Hz, 1H), 7.33 (t,  $J = 7.4$  Hz, 1H), 7.20 (d,  $J = 8.8$  Hz, 1H), 6.71 (d,  $J = 5.9$  Hz, 1H), 5.96 (dd,  $J = 5.9, 3.0$  Hz, 1H), 5.44 (d,  $J = 3.0$  Hz, 1H).

$^{13}\text{C NMR}$  (100 MHz,  $\text{CDCl}_3$ )  $\delta$  154.17, 146.61, 141.74, 134.95, 134.81, 130.52, 129.78, 129.55, 129.01, 128.31, 127.65, 126.62, 126.29, 124.09, 122.18, 121.76, 121.05, 118.75, 118.10, 113.93, 88.20, 69.53.

**HRMS (ESI)**  $m/z$  Calcd for  $\text{C}_{22}\text{H}_{13}\text{BrNaOS}^+ [\text{M} + \text{Na}]^+$ : 426.9763, Found: 426.9763.

**Optical Rotation:**  $[\alpha]_D^{25} = -95.0^\circ$  ( $c = 0.5$ , acetone).

**HPLC analysis:** Chiralcel OD-H (Hexane/*i*-PrOH = 95:5, flow rate = 1.0 mL/min, wave length = 254 nm),  $t_R = 6.292$  min (minor),  $t_R = 8.225$  min (major), 90% ee

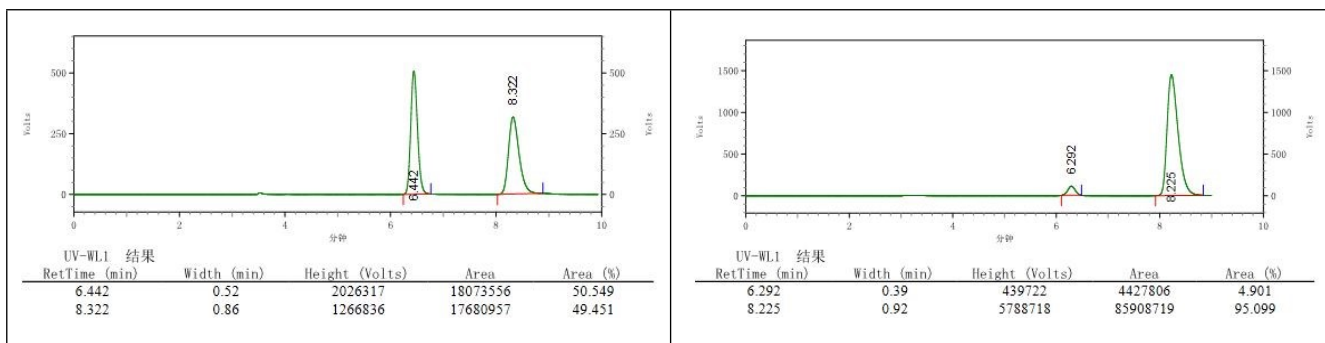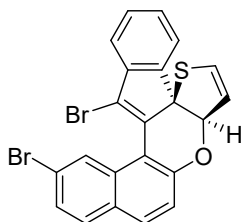

**(4bR,7aR)-13,15-dibromo-7aH-benzo[f]indeno[1,2-c]thieno[3,2-b]chromene (4b)**

Compound **4b** was synthesized in 87% yield (107.6 mg, 0.3 mmol scale) under condition [A].

White solid. ( $R_f = 0.6$ , PE/EA = 20:1)

$^1\text{H NMR}$  (400 MHz,  $\text{CDCl}_3$ )  $\delta$  8.17 (s, 1H), 7.74 (d,  $J = 8.9$  Hz, 1H), 7.67 (d,  $J = 8.7$  Hz, 1H), 7.60 – 7.44 (m, 4H), 7.36 (t,  $J = 7.4$  Hz, 1H), 7.21 (d,  $J = 8.9$  Hz, 1H), 6.77 (d,  $J = 6.0$  Hz, 1H), 6.00 (dd,  $J = 6.0, 3.0$  Hz, 1H), 5.42 (d,  $J = 3.0$  Hz, 1H).

$^{13}\text{C NMR}$  (100 MHz,  $\text{CDCl}_3$ )  $\delta$  155.11, 146.35, 141.54, 135.19, 134.06, 130.88, 130.38, 129.85, 129.16, 128.92, 127.88, 127.40, 122.07, 121.74, 121.21, 120.90, 119.33, 118.51, 112.89, 88.30, 69.17.

**HRMS (ESI)**  $m/z$  Calcd for  $\text{C}_{22}\text{H}_{12}\text{Br}_2\text{NaOS}^+$  [ $M + \text{Na}$ ] $^+$ : 504.8868, Found: 504.8866.

**Optical Rotation:**  $[\alpha]_D^{25} = -185.0^\circ$  ( $c = 0.5$ , acetone).

**HPLC analysis:** Chiralcel AD-H (Hexane/*i*-PrOH = 95:5, flow rate = 1.0 mL/min, wave length = 254 nm),  $t_R = 5.519$  min (minor),  $t_R = 7.183$  min (major), 96% ee

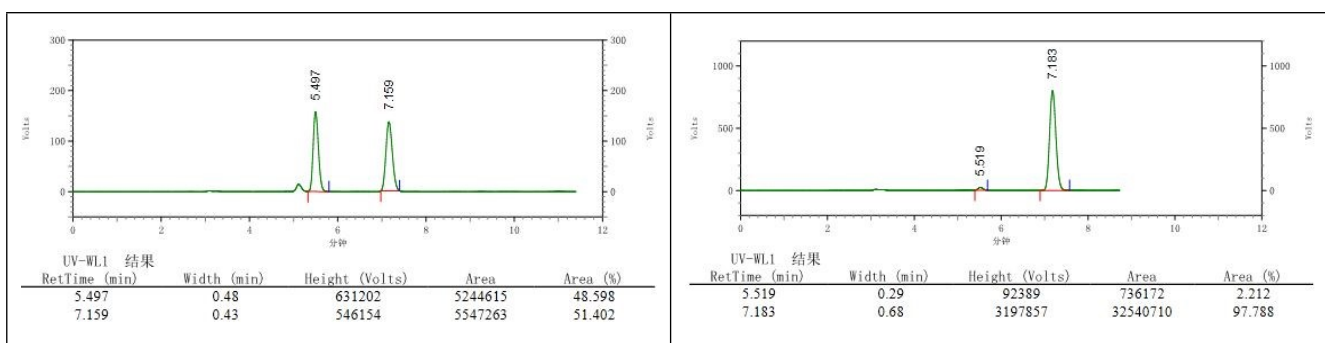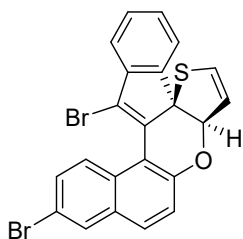

### (4bR,7aR)-12,15-dibromo-7aH-benzo[f]indeno[1,2-c]thieno[3,2-b]chromene (4c)

Compound **4c** was synthesized in 95% yield (137.6 mg, 0.3 mmol scale) under condition [A].

White solid. ( $R_f$  = 0.5, PE/EA = 20:1)

$^1\text{H NMR}$  (400 MHz,  $\text{CDCl}_3$ )  $\delta$  7.97 (s, 1H), 7.84 (d,  $J$  = 8.9 Hz, 1H), 7.70 (d,  $J$  = 8.9 Hz, 1H), 7.60 (d,  $J$  = 8.9 Hz, 1H), 7.57 – 7.44 (m, 3H), 7.36 (t,  $J$  = 7.5 Hz, 1H), 7.23 (d,  $J$  = 8.8 Hz, 1H), 6.76 (d,  $J$  = 5.9 Hz, 1H), 5.99 (dd,  $J$  = 6.0, 3.0 Hz, 1H), 5.44 (d,  $J$  = 3.0 Hz, 1H).

$^{13}\text{C NMR}$  (100 MHz,  $\text{CDCl}_3$ )  $\delta$  154.46, 146.47, 141.53, 135.00, 134.32, 130.67, 130.21, 129.55, 129.46, 129.12, 128.34, 127.87, 122.13, 121.78, 121.18, 119.23, 117.87, 113.99, 88.33, 69.32.

**HRMS (ESI)**  $m/z$  Calcd for  $\text{C}_{22}\text{H}_{12}\text{Br}_2\text{NaOS}^+$  [ $M + \text{Na}$ ] $^+$ : 504.8868, Found: 504.8868.

**Optical Rotation:**  $[\alpha]_D^{25} = -147.0^\circ$  ( $c$  = 0.5, acetone).

**HPLC analysis:** Chiralcel AD-H (Hexane/*i*-PrOH = 95:5, flow rate = 1.0 mL/min, wave length = 254 nm),  $t_R$  = 5.551 min (minor),  $t_R$  = 6.929 min (major), 90% ee

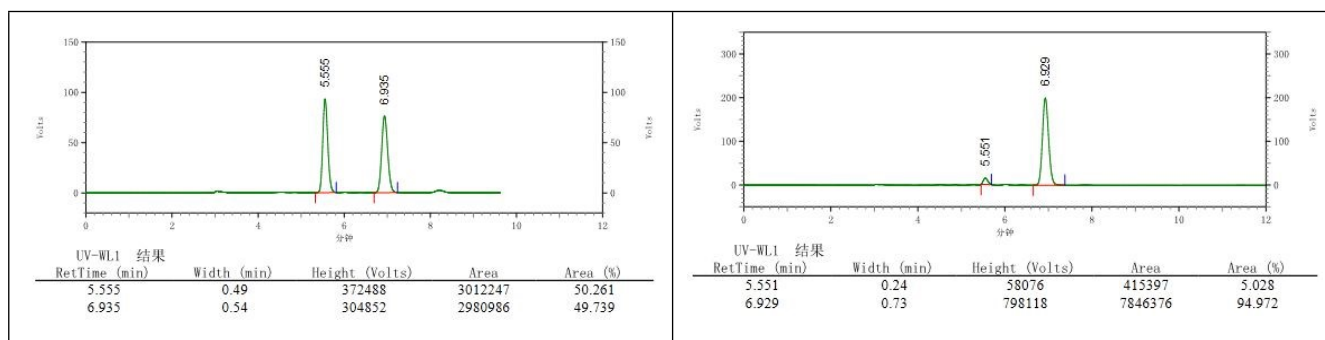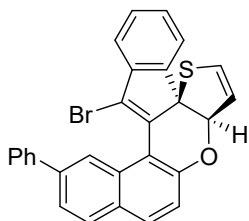

### (4bR,7aR)-15-bromo-13-phenyl-7aH-benzo[f]indeno[1,2-c]thieno[3,2-b]chromene (4d)

Compound **4d** was synthesized in 89% yield (107.6 mg, 0.3 mmol scale) under condition [A].

White solid. ( $R_f$  = 0.5, PE/EA = 20:1)

$^1\text{H NMR}$  (400 MHz,  $\text{CDCl}_3$ )  $\delta$  8.19 (s, 1H), 7.89 (d,  $J$  = 8.4 Hz, 1H), 7.82 (t,  $J$  = 7.6 Hz, 3H), 7.68 (dd,  $J$  = 4.2, 0.6 Hz, 1H), 7.58 (d,  $J$  = 7.6 Hz, 1H), 7.53 (d,  $J$  = 7.5 Hz, 1H), 7.48 (q,  $J$  = 7.2 Hz, 3H), 7.36 (q,  $J$  = 6.6 Hz, 2H), 7.21 (d,  $J$  = 8.8 Hz, 1H), 6.74 (d,  $J$  = 5.9 Hz, 1H), 5.99 (dd,  $J$  = 5.9, 3.0 Hz, 1H), 5.46 (d,  $J$  = 2.9 Hz, 1H).

$^{13}\text{C NMR}$  (100 MHz,  $\text{CDCl}_3$ )  $\delta$  154.58, 146.59, 141.72, 141.08, 139.08, 134.98, 134.92, 130.25, 130.05, 129.05, 128.88, 128.80, 128.74, 127.71, 127.51, 127.43, 124.69, 123.75, 122.17, 121.80, 121.08, 118.89, 118.09, 114.10, 88.23, 69.49.

**HRMS (ESI)**  $m/z$  Calcd for  $\text{C}_{28}\text{H}_{17}\text{BrNaOS}^+$  [ $M + \text{Na}$ ] $^+$ : 503.0076, Found: 503.0077.

**Optical Rotation:**  $[\alpha]_D^{25} = -219.4.0^\circ$  ( $c$  = 0.5, acetone).

**HPLC analysis:** Chiralcel OD-H (Hexane/*i*-PrOH = 95:5, flow rate = 1.0 mL/min, wave length = 254 nm),  $t_R$  = 6.331 min (minor),  $t_R$  = 7.183 min (major), 85% ee

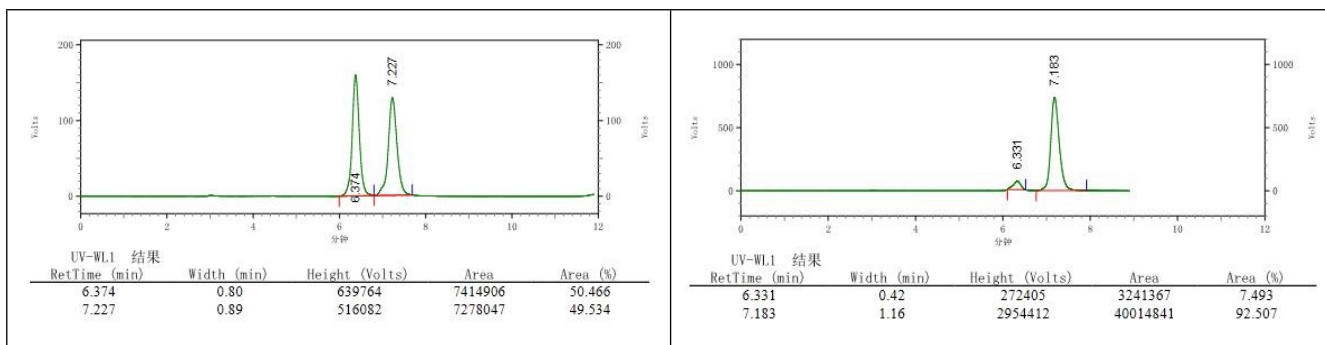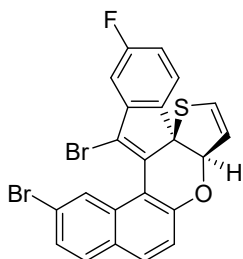

**(4bR,7aR)-13,15-dibromo-2-fluoro-7aH-benzo[f]indeno[1,2-c]thieno[3,2-b]chromene (4e)**

Compound **4e** was synthesized in 85% yield (127.5 mg, 0.3 mmol scale) under condition [A].

White solid. ( $R_f$  = 0.5, PE/EA = 20:1)

$^1\text{H NMR}$  (400 MHz,  $\text{CDCl}_3$ )  $\delta$  8.12 (s, 1H), 7.74 (d,  $J$  = 8.9 Hz, 1H), 7.65 (d,  $J$  = 8.6 Hz, 1H), 7.46 (dd,  $J$  = 8.3, 4.6 Hz, 2H), 7.26 – 7.22 (m, 1H), 7.19 (d,  $J$  = 8.8 Hz, 1H), 7.02 (t,  $J$  = 7.8 Hz, 1H), 6.75 (d,  $J$  = 5.9 Hz, 1H), 5.98 (dd,  $J$  = 6.0, 3.0 Hz, 1H), 5.37 (d,  $J$  = 3.0 Hz, 1H).

$^{13}\text{C NMR}$  (100 MHz,  $\text{CDCl}_3$ )  $\delta$  163.67 (d,  $J$  = 246.9 Hz), 155.14, 143.86 (d,  $J$  = 9.7 Hz), 141.84, 136.22, 135.12, 130.70, 129.87, 128.81, 127.86, 127.47, 123.04 (d,  $J$  = 9.2 Hz), 121.90, 121.01, 118.43, 117.90 (d,  $J$  = 3.2 Hz), 114.48 (d,  $J$  = 23.5 Hz), 112.43, 108.65 (d,  $J$  = 25.1 Hz), 88.15, 68.54.

**HRMS (ESI)**  $m/z$  Calcd for  $\text{C}_{22}\text{H}_{11}\text{Br}_2\text{FNaOS}^+ [\text{M} + \text{Na}]^+$ : 522.8774, Found: 522.8775.

**Optical Rotation:**  $[\alpha]_D^{25} = -228.0^\circ$  ( $c$  = 0.4, acetone).

**HPLC analysis:** Chiralcel AD-H (Hexane/*i*-PrOH = 95:5, flow rate = 1.0 mL/min, wave length = 254 nm),  $t_R$  = 6.010 min (minor),  $t_R$  = 6.968 min (major), 88% ee

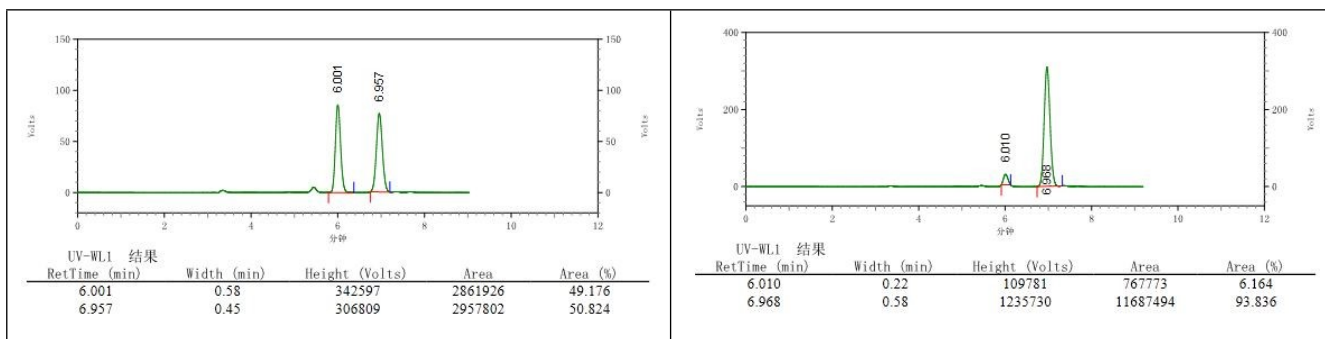

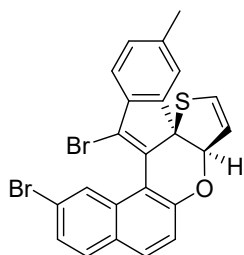

**(4bR,7aR)-13,15-dibromo-3-methyl-7aH-benzo[f]indeno[1,2-c]thieno[3,2-b]chromene (4f)**

Compound **4f** was synthesized in 89% yield (132.5 mg, 0.3 mmol scale) under condition [A].

White solid. ( $R_f$  = 0.5, PE/EA = 20:1)

$^1\text{H NMR}$  (400 MHz,  $\text{CDCl}_3$ )  $\delta$  8.16 (s, 1H), 7.73 (d,  $J$  = 8.8 Hz, 1H), 7.66 (d,  $J$  = 8.6 Hz, 1H), 7.45 (dd,  $J$  = 13.8, 8.3 Hz, 2H), 7.34 (s, 1H), 7.29 (d,  $J$  = 7.8 Hz, 1H), 7.20 (d,  $J$  = 8.9 Hz, 1H), 6.77 (d,  $J$  = 5.9 Hz, 1H), 5.99 (dd,  $J$  = 6.0, 3.0 Hz, 1H), 5.40 (d,  $J$  = 3.0 Hz, 1H), 2.45 (s, 3H).

$^{13}\text{C NMR}$  (100 MHz,  $\text{CDCl}_3$ )  $\delta$  155.01, 146.54, 139.03, 138.17, 135.18, 132.96, 130.91, 130.16, 129.84, 129.81, 128.94, 127.90, 127.35, 122.45, 122.03, 120.92, 120.80, 119.40, 118.50, 113.06, 88.39, 69.02, 21.62.

**HRMS (ESI)**  $m/z$  Calcd for  $\text{C}_{23}\text{H}_{14}\text{Br}_2\text{NaOS}^+$  [ $M + \text{Na}$ ] $^+$ : 518.9024, Found: 518.9028.

**Optical Rotation:**  $[\alpha]_D^{25} = -185.0^\circ$  ( $c$  = 0.5, acetone).

**HPLC analysis:** Chiralcel AD-H (Hexane/*i*-PrOH = 95:5, flow rate = 1.0 mL/min, wave length = 254 nm),  $t_R$  = 4.872 min (minor),  $t_R$  = 6.448 min (major), 90% ee

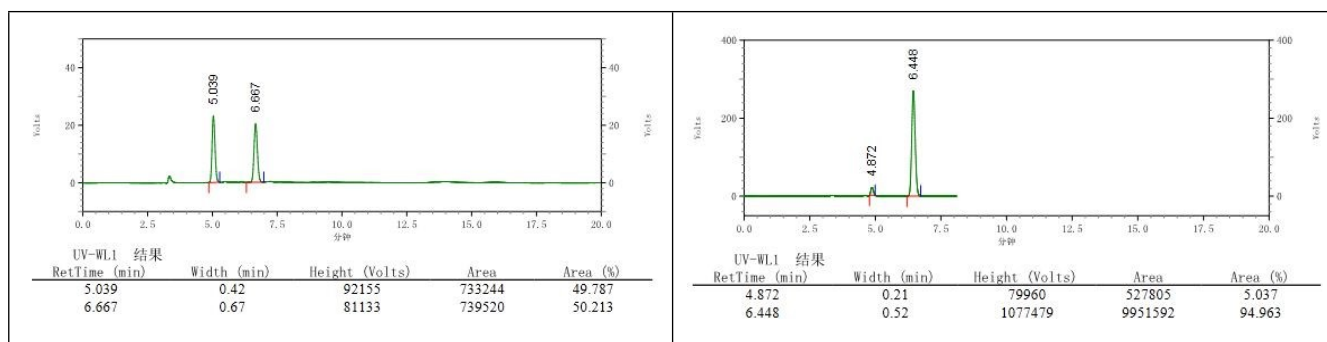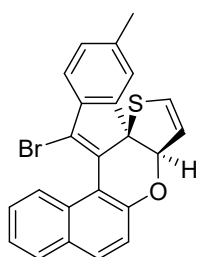

**(4bR,7aR)-15-bromo-3-methyl-7aH-benzo[f]indeno[1,2-c]thieno[3,2-b]chromene (4g)**

Compound **4g** was synthesized in 90% yield (107.6 mg, 0.3 mmol scale) under condition [B].

White solid. ( $R_f$  = 0.5, PE/EA = 20:1)

**<sup>1</sup>H NMR** (400 MHz, CDCl<sub>3</sub>) δ 8.04 (d, *J* = 8.4 Hz, 1H), 7.84 (dd, *J* = 13.8, 8.5 Hz, 2H), 7.59 (t, *J* = 7.6 Hz, 1H), 7.55 – 7.42 (m, 2H), 7.40 (s, 1H), 7.32 (d, *J* = 7.8 Hz, 1H), 7.26 (d, *J* = 8.8 Hz, 1H), 6.75 (d, *J* = 5.9 Hz, 1H), 6.01 (dd, *J* = 6.0, 3.0 Hz, 1H), 5.49 (d, *J* = 3.0 Hz, 1H), 2.49 (s, 3H).

**<sup>13</sup>C NMR** (100 MHz, CDCl<sub>3</sub>) δ 154.07, 146.76, 139.20, 137.88, 134.78, 133.86, 130.29, 129.80, 129.67, 129.52, 128.26, 126.63, 126.19, 124.02, 122.47, 122.13, 120.74, 118.79, 118.08, 114.06, 88.27, 69.37, 21.57.

**HRMS (ESI)** *m/z* Calcd for C<sub>23</sub>H<sub>15</sub>BrNaOS<sup>+</sup> [M + Na]<sup>+</sup>: 440.9919, Found: 440.9920.

**Optical Rotation:**  $[\alpha]_D^{25} = -185.0^\circ$  (*c* = 0.6, acetone).

**HPLC analysis:** Chiralcel AD-H (Hexane/*i*-PrOH = 95:5, flow rate = 1.0 mL/min, wave length = 254 nm), *t<sub>R</sub>* = 4.448 min (minor), *t<sub>R</sub>* = 6.694 min (major), 88% ee

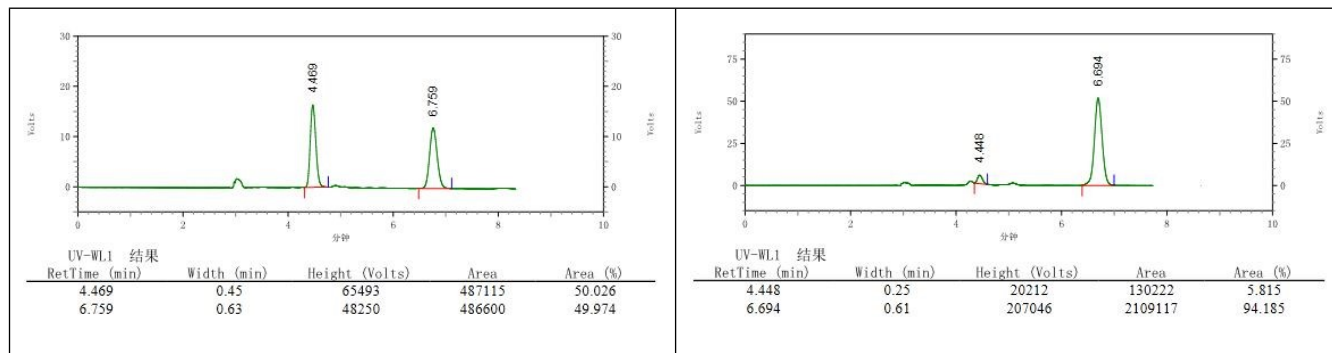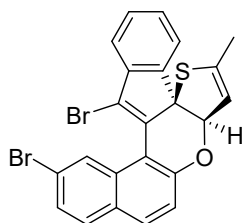

**(4bR,7aR)-13,15-dibromo-6-methyl-7aH-benzo[f]indeno[1,2-c]thieno[3,2-b]chromene (4h)**

Compound **4h** was synthesized in 92% yield (136.6 mg, 0.3 mmol scale) under condition [A].

White solid. (*R<sub>f</sub>* = 0.5, PE/EA = 20:1)

**<sup>1</sup>H NMR** (400 MHz, CDCl<sub>3</sub>) δ 8.15 (s, 1H), 7.74 (d, *J* = 8.8 Hz, 1H), 7.66 (d, *J* = 8.6 Hz, 1H), 7.55 (dd, *J* = 7.6, 3.9 Hz, 2H), 7.48 (t, *J* = 8.2 Hz, 2H), 7.35 (t, *J* = 7.5 Hz, 1H), 7.20 (d, *J* = 8.9 Hz, 1H), 5.71 (s, 1H), 5.31 (d, *J* = 2.9 Hz, 1H), 2.07 (s, 3H).

**<sup>13</sup>C NMR** (100 MHz, CDCl<sub>3</sub>) δ 155.27, 148.30, 146.72, 141.40, 134.36, 130.89, 130.32, 129.81, 129.04, 128.94, 127.78, 127.25, 121.74, 121.09, 120.79, 119.03, 118.53, 118.23, 112.51, 89.30, 70.01, 16.90.

**HRMS (ESI)** *m/z* Calcd for C<sub>23</sub>H<sub>14</sub>Br<sub>2</sub>NaOS<sup>+</sup> [M + Na]<sup>+</sup>: 518.9024, Found: 518.9025.

**Optical Rotation:**  $[\alpha]_D^{25} = -18.5^\circ$  (*c* = 0.2, acetone).

**HPLC analysis:** Chiralcel AD-H (Hexane/*i*-PrOH = 95:5, flow rate = 1.0 mL/min, wave length = 254 nm), *t<sub>R</sub>* = 4.162 min (minor), *t<sub>R</sub>* = 4.878 min (major), 86% ee

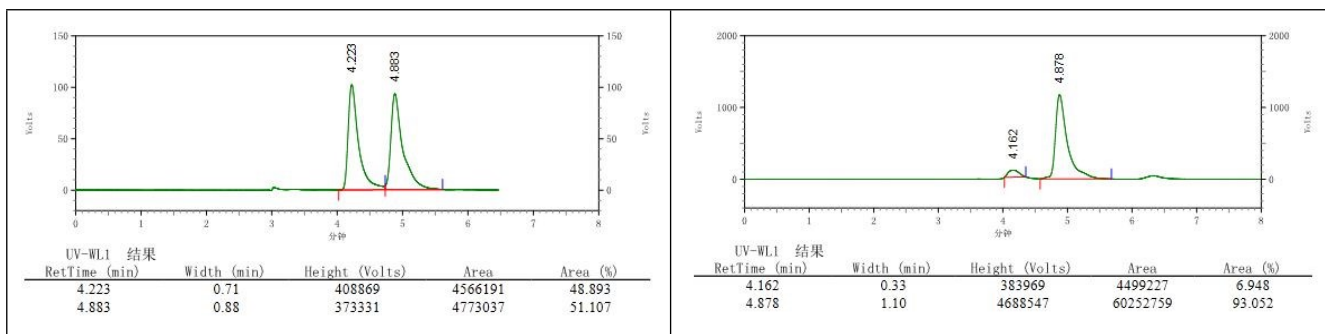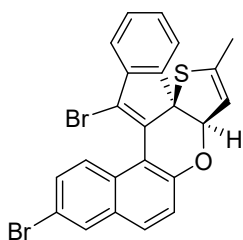

**(4bR,7aR)-12,15-dibromo-6-methyl-7aH-benzo[f]indeno[1,2-c]thieno[3,2-b]chromene (4i)**

Compound **4i** was synthesized in 92% yield (136.4 mg, 0.3 mmol scale) under condition [A].

White solid. ( $R_f$  = 0.5, PE/EA = 20:1)

$^1\text{H NMR}$  (400 MHz,  $\text{CDCl}_3$ )  $\delta$  7.96 (s, 1H), 7.84 (d,  $J$  = 8.9 Hz, 1H), 7.69 (d,  $J$  = 8.9 Hz, 1H), 7.59 (dd,  $J$  = 8.9, 2.1 Hz, 1H), 7.54 (t,  $J$  = 7.9 Hz, 2H), 7.47 (t,  $J$  = 7.5 Hz, 1H), 7.35 (t,  $J$  = 7.4 Hz, 1H), 7.22 (d,  $J$  = 8.9 Hz, 1H), 5.69 (s, 1H), 5.33 (d,  $J$  = 2.0 Hz, 1H), 2.05 (s, 3H).

$^{13}\text{C NMR}$  (100 MHz,  $\text{CDCl}_3$ )  $\delta$  154.65, 148.08, 146.86, 141.40, 134.66, 130.58, 130.19, 129.46, 129.42, 129.02, 128.38, 127.79, 121.80, 121.06, 119.28, 118.94, 118.31, 117.71, 113.65, 89.34, 70.22, 16.87.

**HRMS (ESI)**  $m/z$  Calcd for  $\text{C}_{23}\text{H}_{14}\text{Br}_2\text{NaOS}^+$  [ $M + \text{Na}$ ] $^+$ : 518.9024, Found: 518.9024.

**Optical Rotation:**  $[\alpha]_D^{25} = -12.5^\circ$  ( $c$  = 0.2, acetone).

**HPLC analysis:** Chiralcel IA-H\*2 (Hexane/*i*-PrOH = 95:5, flow rate = 1.0 mL/min, wave length = 254 nm),  $t_R$  = 9.543 min (minor),  $t_R$  = 10.911 min (major), 90% ee

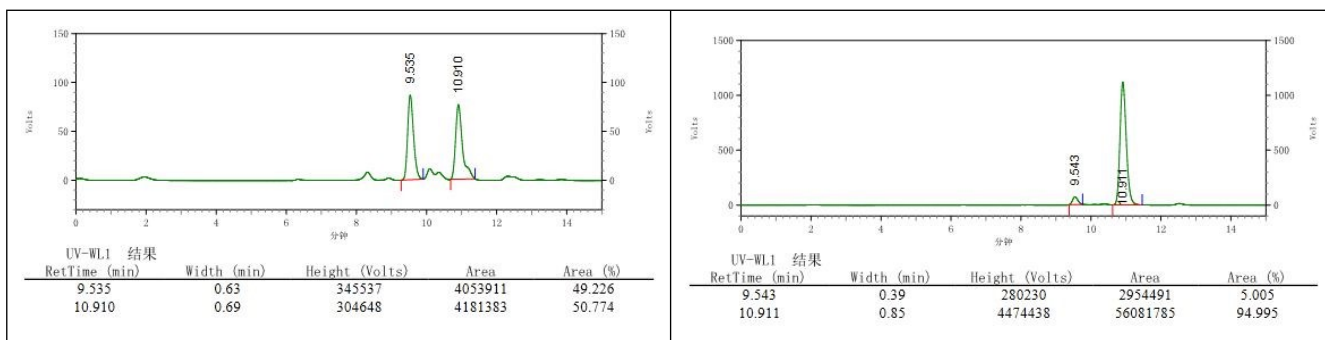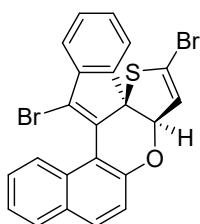



### (4b*R*,7a*R*)-6,15-dibromo-7aH-benzo[*f*]indeno[1,2-*c*]thieno[3,2-*b*]chromene (4j)

Compound **4j** was synthesized in 87% yield (125.8 mg, 0.3 mmol scale) under condition [A].

White solid. ( $R_f = 0.5$ , PE/EA = 20:1)

$^1\text{H NMR}$  (400 MHz,  $\text{CDCl}_3$ )  $\delta$  7.94 (d,  $J = 8.4$  Hz, 1H), 7.82 (t,  $J = 7.7$  Hz, 2H), 7.60 (d,  $J = 7.5$  Hz, 1H), 7.57 – 7.51 (m, 2H), 7.48 (t,  $J = 7.5$  Hz, 1H), 7.42 (t,  $J = 7.5$  Hz, 1H), 7.36 (t,  $J = 7.4$  Hz, 1H), 7.22 (d,  $J = 9.0$  Hz, 1H), 6.12 (d,  $J = 3.2$  Hz, 1H), 5.28 (d,  $J = 3.1$  Hz, 1H).

$^{13}\text{C NMR}$  (100 MHz,  $\text{CDCl}_3$ )  $\delta$  153.91, 145.76, 141.52, 133.83, 130.80, 129.69, 129.66, 129.41, 128.37, 127.97, 126.56, 126.38, 124.25, 123.95, 123.73, 121.98, 121.21, 119.75, 118.06, 113.51, 87.70, 72.47.

**HRMS (ESI)**  $m/z$  Calcd for  $\text{C}_{22}\text{H}_{12}\text{Br}_2\text{NaOS}^+$  [ $\text{M} + \text{Na}$ ] $^+$ : 504.8868, Found: 504.8868.

**Optical Rotation:**  $[\alpha]_D^{25} = -16.0^\circ$  ( $c = 0.3$ , acetone).

**HPLC analysis:** Chiralcel AD-H (Hexane/*i*-PrOH = 95:5, flow rate = 1.0 mL/min, wave length = 254 nm),  $t_R = 4.649$  min (minor),  $t_R = 5.335$  min (major), 88% ee

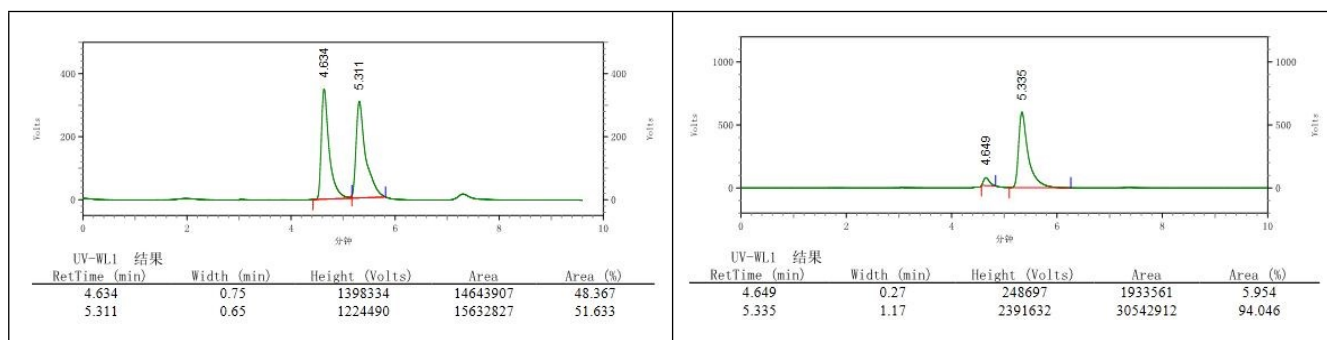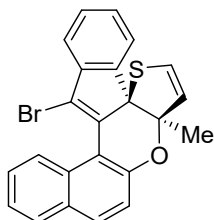

### (4b*R*,7a*R*)-15-bromo-7a-methyl-7aH-benzo[*f*]indeno[1,2-*c*]thieno[3,2-*b*]chromene (4k)

Compound **4k** was synthesized in 76% yield (95.6 mg, 0.3 mmol scale) under condition [A].

Yellow oil. ( $R_f = 0.5$ , PE/EA = 20:1)

$^1\text{H NMR}$  (400 MHz,  $\text{CDCl}_3$ )  $\delta$  7.94 (d,  $J = 8.4$  Hz, 1H), 7.78 (t,  $J = 10.1$  Hz, 2H), 7.61 – 7.47 (m, 3H), 7.44 (t,  $J = 7.6$  Hz, 1H), 7.38 (t,  $J = 7.6$  Hz, 1H), 7.31 (t,  $J = 7.6$  Hz, 1H), 7.16 (d,  $J = 8.9$  Hz, 1H), 6.65 (dd,  $J = 5.9, 2.6$  Hz, 1H), 5.86 (d,  $J = 5.4$  Hz, 1H), 1.29 (s, 3H).

$^{13}\text{C NMR}$  (100 MHz,  $\text{CDCl}_3$ )  $\delta$  156.01, 145.05, 142.19, 135.94, 131.72, 130.58, 129.71, 129.33, 128.83, 128.32, 128.02, 127.30, 126.66, 126.12, 123.80, 123.32, 120.81, 118.41, 117.70, 112.28, 94.38, 72.10, 22.98.

**HRMS (ESI)**  $m/z$  Calcd for  $\text{C}_{23}\text{H}_{15}\text{BrNaOS}^+$  [ $\text{M} + \text{Na}$ ] $^+$ : 440.9919, Found: 440.9919.

**Optical Rotation:**  $[\alpha]_D^{25} = -127.0^\circ$  ( $c = 0.2$ , acetone).

**HPLC analysis:** Chiralcel AD-H (Hexane/*i*-PrOH = 95:5, flow rate = 1.0 mL/min, wave length = 254 nm),  $t_R = 4.314$  min (minor),  $t_R = 4.843$  min (major), 88% ee

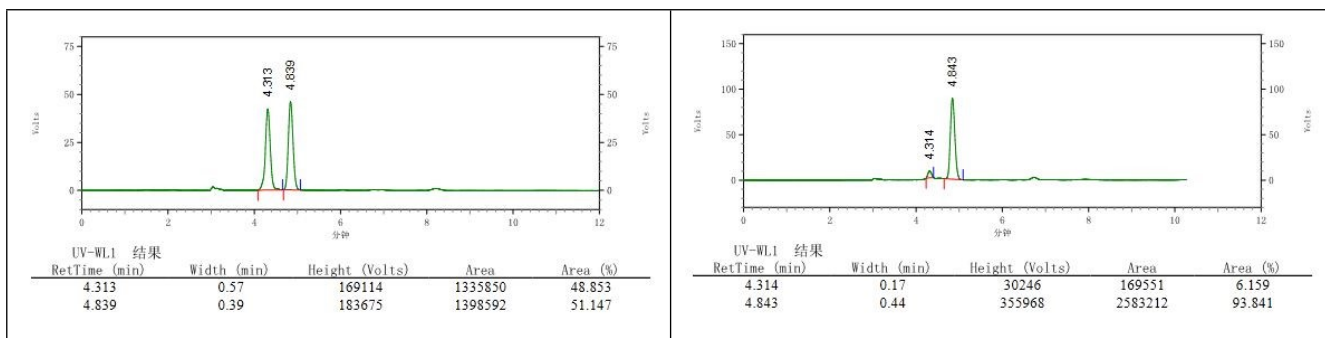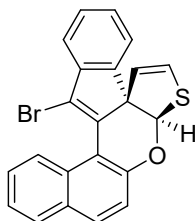

### (7aR,10aS)-15-bromo-7aH-benzo[f]indeno[1,2-c]thieno[2,3-b]chromene (41)

Compound **41** was synthesized in 74% yield (89.7 mg, 0.3 mmol scale) under condition [A].

White solid. ( $R_f$  = 0.5, PE/EA = 20:1)

$^1\text{H NMR}$  (400 MHz,  $\text{CDCl}_3$ )  $\delta$  8.04 (d,  $J$  = 8.4 Hz, 1H), 7.80 (t,  $J$  = 9.1 Hz, 2H), 7.59 – 7.51 (m, 3H), 7.48 (t,  $J$  = 7.5 Hz, 1H), 7.41 (t,  $J$  = 7.5 Hz, 1H), 7.31 (t,  $J$  = 7.4 Hz, 1H), 7.27 – 7.22 (m, 1H), 6.40 (d,  $J$  = 5.9 Hz, 1H), 6.11 (s, 1H), 5.07 (d,  $J$  = 5.9 Hz, 1H).

$^{13}\text{C NMR}$  (100 MHz,  $\text{CDCl}_3$ )  $\delta$  153.21, 143.17, 142.89, 135.34, 130.54, 129.81, 129.42, 129.00, 128.51, 128.41, 127.38, 126.45, 126.30, 124.27, 123.51, 122.45, 121.01, 119.03, 118.12, 114.17, 91.11, 71.27.

**HRMS (ESI)**  $m/z$  Calcd for  $\text{C}_{22}\text{H}_{13}\text{BrNaOS}^+ [\text{M} + \text{Na}]^+$ : 426.9763, Found: 426.9765.

**Optical Rotation:**  $[\alpha]_D^{25} = -189.0^\circ$  ( $c$  = 0.2, acetone).

**HPLC analysis:** Chiralcel OD-H (Hexane/*i*-PrOH = 95:5, flow rate = 1.0 mL/min, wave length = 254 nm),  $t_R$  = 5.503 min (minor),  $t_R$  = 5.860 min (major), 88% ee

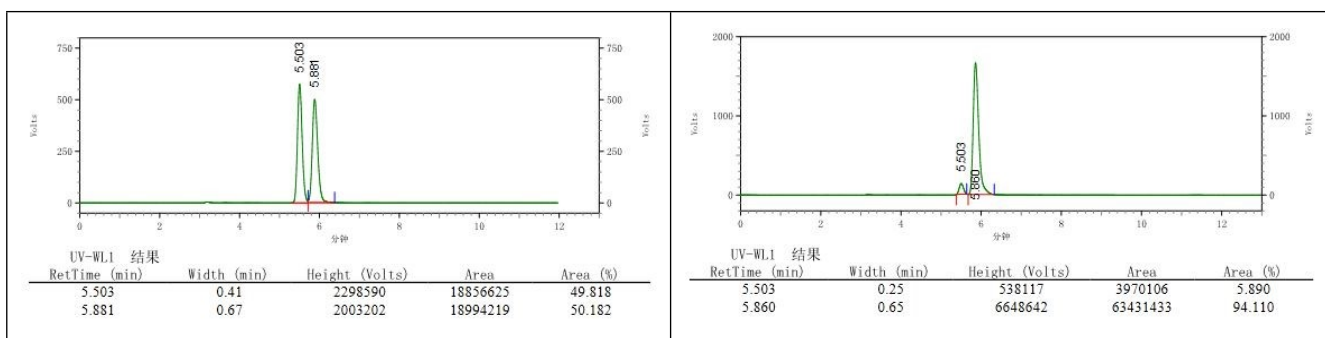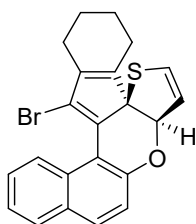

**(4bR,7aR)-15-bromo-1,2,3,4-tetrahydro-7aH-benzo[f]indeno[1,2-c]thieno[3,2-b]chromene (4m)**

Compound **4m** was synthesized in 89% yield (108.9 mg, 0.3 mmol scale) under condition [A].

White solid. ( $R_f$  = 0.5, PE/EA = 20:1)

<sup>1</sup>H NMR (400 MHz, CDCl<sub>3</sub>)  $\delta$  7.93 (d,  $J$  = 8.4 Hz, 1H), 7.77 (d,  $J$  = 8.1 Hz, 1H), 7.71 (d,  $J$  = 8.8 Hz, 1H), 7.50 (t,  $J$  = 7.7 Hz, 1H), 7.36 (t,  $J$  = 7.5 Hz, 1H), 7.16 (d,  $J$  = 8.9 Hz, 1H), 6.58 (d,  $J$  = 5.8 Hz, 1H), 5.90 (dd,  $J$  = 5.9, 3.0 Hz, 1H), 5.12 (d,  $J$  = 3.0 Hz, 1H), 2.48 – 2.31 (m, 3H), 2.23 – 2.14 (m, 1H), 1.88 – 1.68 (m, 4H).

<sup>13</sup>C NMR (100 MHz, CDCl<sub>3</sub>)  $\delta$  153.17, 143.94, 138.59, 134.06, 132.69, 129.50, 129.46, 128.15, 126.89, 125.89, 123.80, 122.66, 121.13, 117.89, 113.80, 85.29, 71.03, 23.57, 22.55, 22.53, 21.20.

**HRMS (ESI)**  $m/z$  Calcd for C<sub>22</sub>H<sub>17</sub>BrNaOS<sup>+</sup> [M + Na]<sup>+</sup>: 431.0076, Found: 431.0078.

**HPLC analysis:** Chiralcel IA-H (Hexane/*i*-PrOH = 95:5, flow rate = 1.0 mL/min, wave length = 254 nm),  $t_R$  = 3.982 min (minor),  $t_R$  = 6.352 min (major), 36% ee

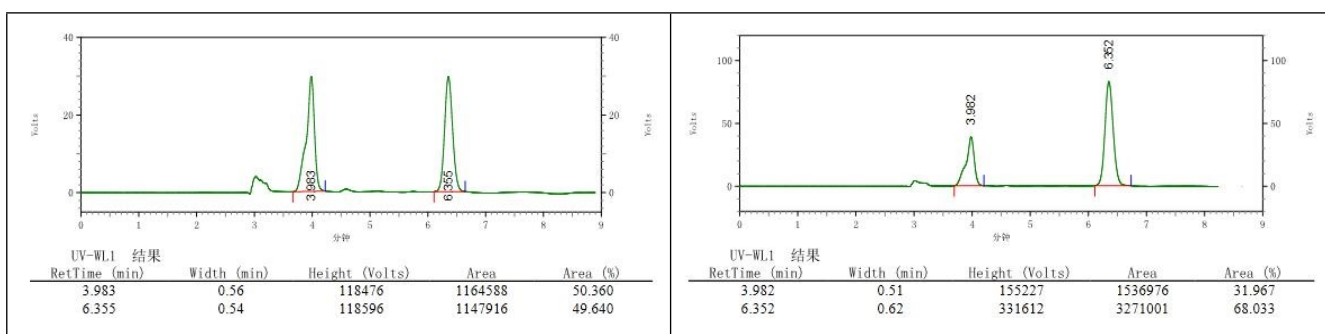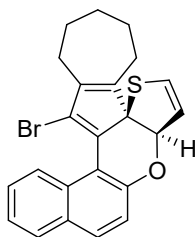

**(5bR,8aR)-16-bromo-2,3,4,5-tetrahydro-1H,8aH-azuleno[1,2-c]benzo[f]thieno[3,2-b]chromene (4n)**

Compound **4n** was synthesized in 76% yield (96.2 mg, 0.3 mmol scale) under condition [A].

White solid. ( $R_f$  = 0.5, PE/EA = 20:1)

<sup>1</sup>H NMR (400 MHz, CDCl<sub>3</sub>)  $\delta$  7.90 (d,  $J$  = 8.4 Hz, 1H), 7.78 (d,  $J$  = 8.1 Hz, 1H), 7.72 (d,  $J$  = 8.8 Hz, 1H), 7.50 (t,  $J$  = 7.6 Hz, 1H), 7.37 (t,  $J$  = 7.5 Hz, 1H), 7.16 (d,  $J$  = 8.8 Hz, 1H), 6.52 (d,  $J$  = 5.8 Hz, 1H), 5.87 (dd,  $J$  = 5.8, 2.9 Hz, 1H), 5.29 (d,  $J$  = 2.8 Hz, 1H), 2.70 – 2.56 (m, 2H), 2.53 – 2.45 (m, 1H), 2.41 – 2.32 (m, 1H), 1.91 – 1.65 (m, 6H).

<sup>13</sup>C NMR (100 MHz, CDCl<sub>3</sub>)  $\delta$  152.34, 147.25, 141.25, 133.81, 132.59, 129.65, 129.45, 129.41, 128.18, 126.80, 125.96, 123.92, 123.31, 123.15, 118.12, 115.46, 85.50, 73.11, 31.08, 27.94, 27.90, 26.77, 26.45.

**HRMS (ESI)**  $m/z$  Calcd for C<sub>23</sub>H<sub>19</sub>BrNaOS<sup>+</sup> [M + Na]<sup>+</sup>: 445.0232, Found: 445.0233.

**HPLC analysis:** Chiralcel AD-H (Hexane/*i*-PrOH = 95:5, flow rate = 1.0 mL/min, wave length = 254 nm),  $t_R$  = 3.898 min (minor),  $t_R$  = 6.227 min (major), 18% ee

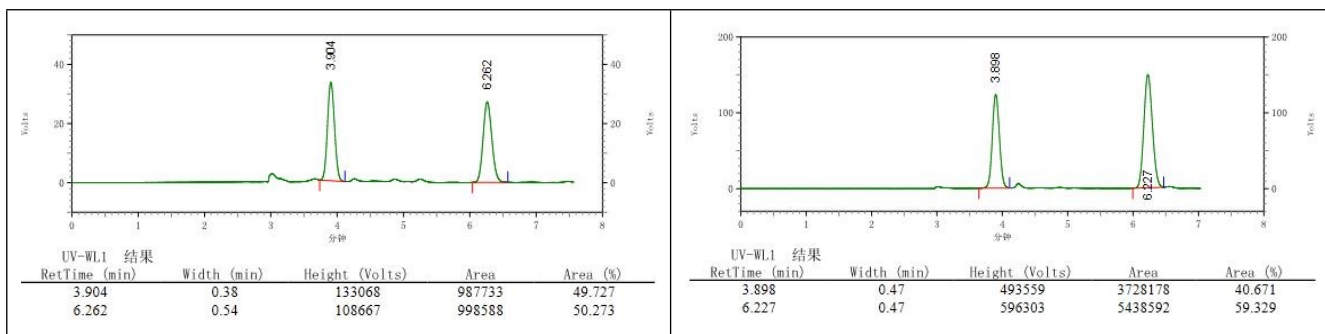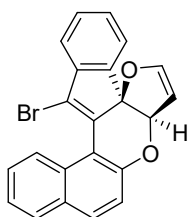

**(4bR,7aR)-15-bromo-7aH-benzo[f]furo[3,2-b]indeno[1,2-c]chromene (4o)**

Compound **4o** was synthesized in 90% yield (77.1 mg, 0.2 mmol scale) under condition [A].

White solid. ( $R_f$  = 0.4, PE/EA = 15:1)

<sup>1</sup>H NMR (400 MHz, CDCl<sub>3</sub>) δ 8.07 (d,  $J$  = 8.4 Hz, 1H), 7.83 (dd,  $J$  = 8.2, 5.9 Hz, 2H), 7.57 (t,  $J$  = 7.6 Hz, 1H), 7.53 – 7.48 (m, 2H), 7.46 – 7.40 (m, 2H), 7.32 (td,  $J$  = 7.3, 1.8 Hz, 1H), 7.22 (d,  $J$  = 8.8 Hz, 1H), 6.69 (d,  $J$  = 2.1 Hz, 1H), 5.63 (d,  $J$  = 2.1 Hz, 1H), 5.55 (t,  $J$  = 2.6 Hz, 1H).

<sup>13</sup>C NMR (100 MHz, CDCl<sub>3</sub>) δ 152.18, 151.74, 142.51, 142.17, 133.30, 130.66, 129.94, 129.81, 128.33, 127.75, 126.62, 126.41, 124.31, 121.61, 121.31, 121.14, 118.85, 115.09, 104.36, 95.83, 83.45.

HRMS (ESI)  $m/z$  Calcd for C<sub>22</sub>H<sub>13</sub>BrNaO<sub>2</sub><sup>+</sup> [M + Na]<sup>+</sup>: 410.9991, Found: 410.9991.

HPLC analysis: Chiralcel OD-H (Hexane/*i*-PrOH = 95:5, flow rate = 1.0 mL/min, wave length = 254 nm),  $t_R$  = 5.499 min (minor),  $t_R$  = 6.068 min (major), 66% ee

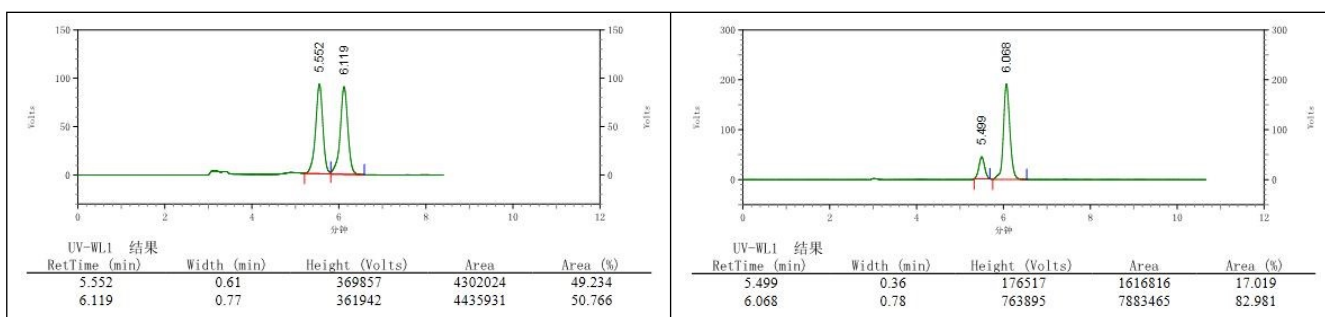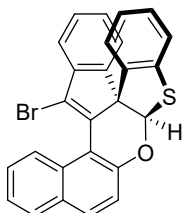

**(4bR,9aR)-17-bromo-9aH-benzo[f]benzo[4,5]thieno[2,3-b]indeno[1,2-c]chromene (4p)**

Compound **4p** was synthesized in 69% yield (62.5 mg, 0.2 mmol scale) under condition [A].

White solid. ( $R_f$  = 0.5, PE/EA = 15:1)

**<sup>1</sup>H NMR** (400 MHz, CDCl<sub>3</sub>) δ 8.14 (d, *J* = 8.4 Hz, 1H), 7.69 (d, *J* = 8.2 Hz, 1H), 7.63 (d, *J* = 8.9 Hz, 1H), 7.60 – 7.51 (m, 2H), 7.42 (q, *J* = 7.5 Hz, 2H), 7.35 (t, *J* = 7.7 Hz, 1H), 7.20 – 7.15 (m, 2H), 7.11 (d, *J* = 8.9 Hz, 1H), 6.99 (t, *J* = 7.5 Hz, 1H), 6.66 (td, *J* = 16.2, 7.5 Hz, 2H), 6.07 (s, 1H).

**<sup>13</sup>C NMR** (100 MHz, CDCl<sub>3</sub>) δ 153.26, 144.93, 142.08, 139.73, 138.21, 136.08, 130.71, 129.53, 129.29, 128.86, 128.30, 127.40, 126.49, 126.25, 125.60, 124.05, 122.99, 122.47, 121.15, 119.55, 117.62, 112.32, 92.58, 68.99.

**HRMS (ESI)** *m/z* Calcd for C<sub>26</sub>H<sub>15</sub>BrNaOS<sup>+</sup> [M + Na]<sup>+</sup>: 476.9919, Found: 476.9921.

**HPLC analysis:** Chiralcel OD-H (Hexane/*i*-PrOH = 95:5, flow rate = 1.0 mL/min, wave length = 254 nm), *t*<sub>R</sub> = 6.317 min (minor), *t*<sub>R</sub> = 6.677 min (major), 64% ee

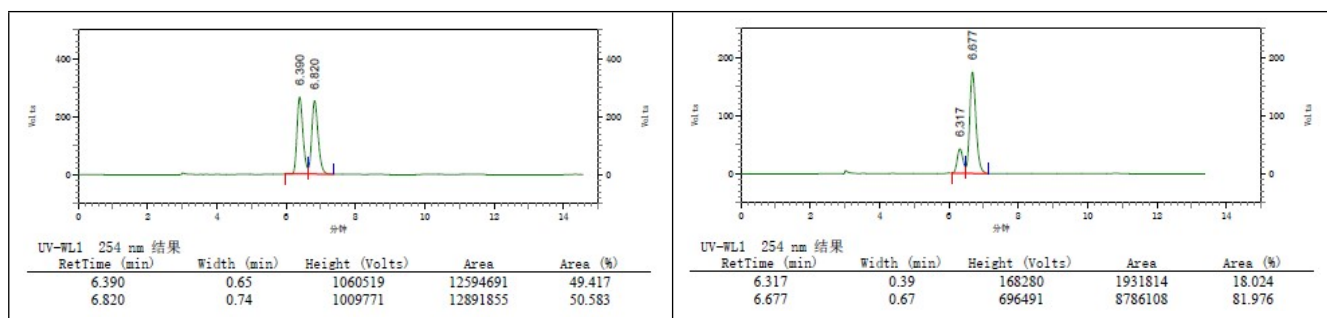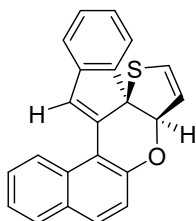

#### (4bR,7aR)-7aH-benzo[f]indeno[1,2-c]thieno[3,2-b]chromene (**4q**)

Compound **4q** was synthesized in 64% yield (42.1 mg, 0.2 mmol scale) under condition [B].

White solid. (*R*<sub>f</sub> = 0.7, PE/EA = 15:1)

**<sup>1</sup>H NMR** (400 MHz, CDCl<sub>3</sub>) δ 8.31 (d, *J* = 8.5 Hz, 1H), 7.77 (d, *J* = 8.1 Hz, 1H), 7.66 (d, *J* = 8.9 Hz, 1H), 7.59 (d, *J* = 7.6 Hz, 1H), 7.52 (t, *J* = 7.6 Hz, 1H), 7.42 (d, *J* = 7.5 Hz, 1H), 7.35 (q, *J* = 7.3 Hz, 2H), 7.30 (s, 1H), 7.21 – 7.14 (m, 2H), 6.91 (d, *J* = 5.9 Hz, 1H), 6.10 (dd, *J* = 5.9, 3.1 Hz, 1H), 5.19 (d, *J* = 3.1 Hz, 1H).

**<sup>13</sup>C NMR** (100 MHz, CDCl<sub>3</sub>) δ 154.54, 146.89, 142.34, 136.50, 136.08, 130.92, 129.51, 129.26, 128.82, 128.60, 128.31, 127.03, 126.12, 123.75, 123.67, 122.55, 121.56, 121.27, 117.91, 111.47, 86.36, 67.11.

**HRMS (ESI)** *m/z* Calcd for C<sub>22</sub>H<sub>14</sub>NaOS<sup>+</sup> [M + Na]<sup>+</sup>: 349.0658, Found: 349.0655.

**Optical Rotation:** [ $\alpha$ ]<sub>D</sub><sup>25</sup> = -145.0° (*c* = 0.2, acetone).

**HPLC analysis:** Chiralcel OD-H (Hexane/*i*-PrOH = 90:10, flow rate = 1.0 mL/min, wave length = 254 nm), *t*<sub>R</sub> = 6.983 min (minor), *t*<sub>R</sub> = 8.323 min (major), 98% ee

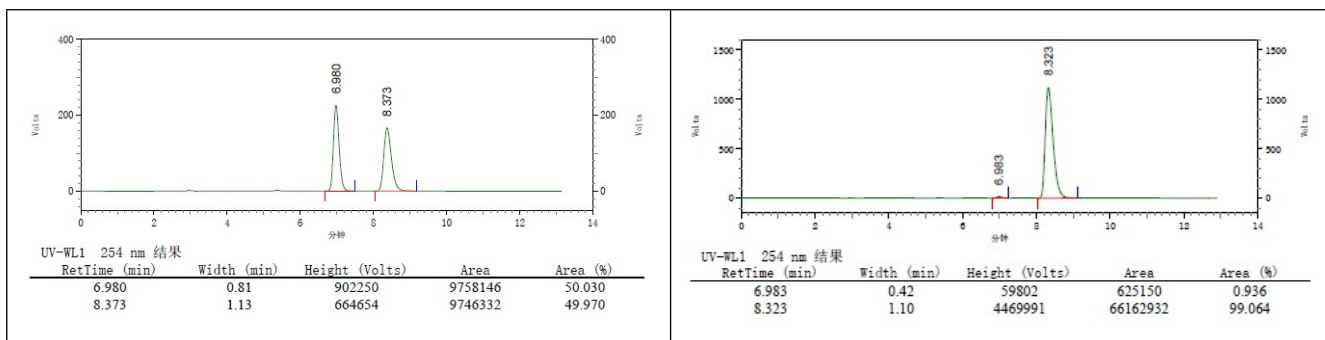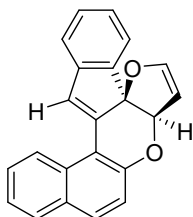

**(4bR,7aR)-7aH-benzo[f]furo[3,2-b]indeno[1,2-c]chromene (4r)**

Compound **4r** was synthesized in 95% yield (44.2 mg, 0.15 mmol scale) under condition [B].

White solid. ( $R_f$  = 0.5, PE/EA = 15:1)

<sup>1</sup>H NMR (400 MHz, CDCl<sub>3</sub>)  $\delta$  8.30 (dd,  $J$  = 8.5, 3.5 Hz, 1H), 7.78 (d,  $J$  = 8.0 Hz, 1H), 7.70 (dd,  $J$  = 8.9, 2.7 Hz, 1H), 7.54 – 7.48 (m, 1H), 7.45 – 7.31 (m, 4H), 7.21 – 7.11 (m, 3H), 6.72 (d,  $J$  = 2.6 Hz, 1H), 5.61 (t,  $J$  = 2.6 Hz, 1H), 5.55 (t,  $J$  = 2.9 Hz, 1H).

<sup>13</sup>C NMR (100 MHz, CDCl<sub>3</sub>)  $\delta$  151.74, 151.63, 143.44, 143.15, 134.91, 131.03, 129.76, 129.62, 129.15, 128.48, 127.02, 126.35, 124.05, 123.79, 121.77, 121.54, 118.88, 114.66, 104.82, 94.40, 82.27.

HRMS (ESI)  $m/z$  Calcd for C<sub>22</sub>H<sub>14</sub>NaO<sub>2</sub><sup>+</sup> [M + Na]<sup>+</sup>: 333.0886, Found: 333.0885.

Optical Rotation:  $[\alpha]_D^{25} = -48.6^\circ$  ( $c$  = 0.5, acetone).

HPLC analysis: Chiralcel AD-H (Hexane/*i*-PrOH = 95:5, flow rate = 1.0 mL/min, wave length = 254 nm),  $t_R$  = 10.623 min (minor),  $t_R$  = 18.113 min (major), 98% ee

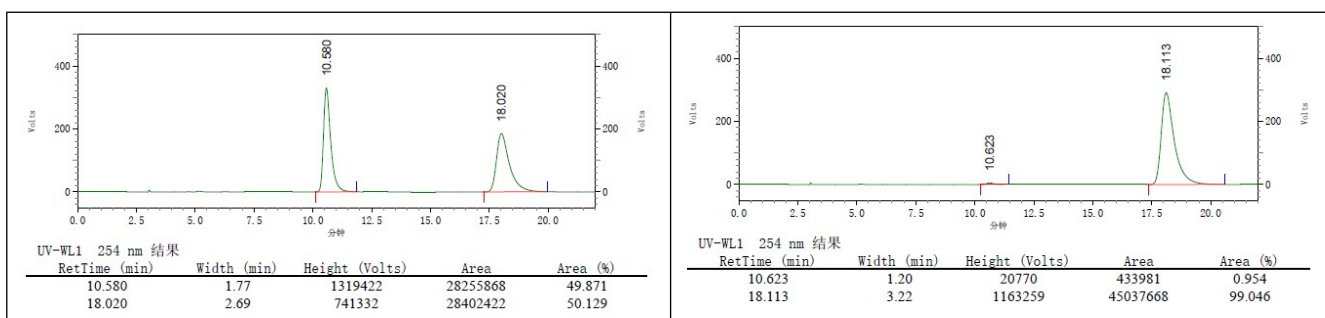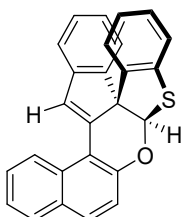

**(4bS,9aR)-9aH-benzo[f]benzo[4,5]thieno[2,3-b]indeno[1,2-c]chromene (4s)**

Compound **4s** was synthesized in 77% yield (87.0 mg, 0.3 mmol scale) under condition [B].

White solid. ( $R_f = 0.5$ , PE/EA = 15:1)

$^1\text{H NMR}$  (400 MHz,  $\text{CDCl}_3$ )  $\delta$  8.48 (d,  $J = 8.5$  Hz, 1H), 7.72 (d,  $J = 8.1$  Hz, 1H), 7.64 – 7.52 (m, 3H), 7.47 (s, 1H), 7.45 (d,  $J = 7.5$  Hz, 1H), 7.36 (t,  $J = 7.6$  Hz, 1H), 7.30 (t,  $J = 7.1$  Hz, 2H), 7.15 – 6.96 (m, 3H), 6.73 (t,  $J = 7.5$  Hz, 1H), 6.66 (d,  $J = 7.6$  Hz, 1H), 6.05 (s, 1H).

$^{13}\text{C NMR}$  (100 MHz,  $\text{CDCl}_3$ )  $\delta$  152.98, 145.47, 142.74, 139.65, 139.56, 138.15, 130.68, 129.66, 129.53, 129.40, 128.63, 128.54, 127.16, 125.93, 125.64, 123.85, 123.51, 122.82, 122.77, 121.62, 117.81, 111.50, 93.12, 66.72.

**HRMS (ESI)**  $m/z$  Calcd for  $\text{C}_{26}\text{H}_{16}\text{NaOS}^+$  [ $\text{M} + \text{Na}$ ] $^+$ : 399.0814, Found: 399.0816.

**Optical Rotation:**  $[\alpha]_D^{25} = -132.8^\circ$  ( $c = 0.5$ , acetone).

**HPLC analysis:** Chiralcel IAIA-H (Hexane/*i*-PrOH = 95:5, flow rate = 1.0 mL/min, wave length = 254 nm),  $t_R = 13.490$  min (minor),  $t_R = 13.947$  min (major), 95% ee

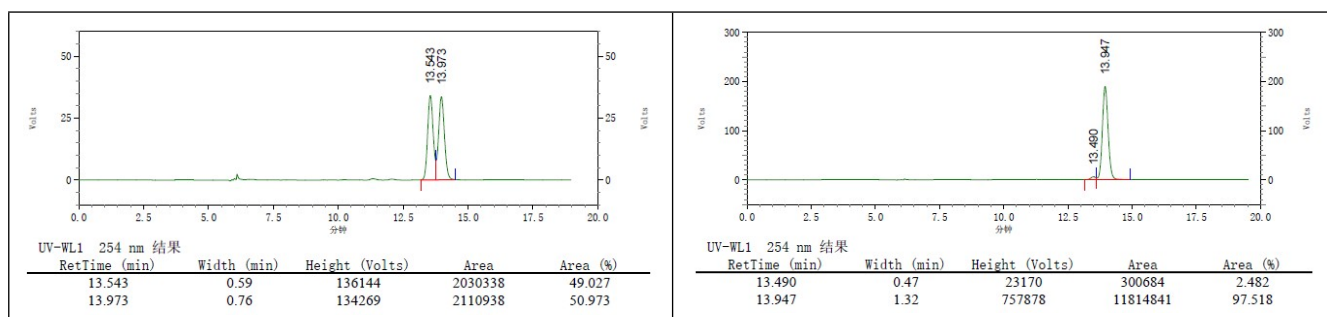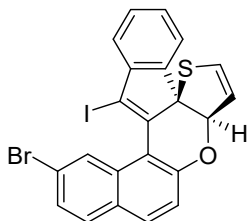

#### (4bR,7aR)-13-bromo-15-iodo-7aH-benzo[f]indeno[1,2-c]thieno[3,2-b]chromene (**4t**)

Compound **4t** was synthesized in 85% yield (127.5 mg, 0.3 mmol scale).

White solid. ( $R_f = 0.5$ , PE/EA = 20:1)

$^1\text{H NMR}$  (400 MHz,  $\text{CDCl}_3$ )  $\delta$  8.16 (s, 1H), 7.73 (d,  $J = 8.9$  Hz, 1H), 7.67 (d,  $J = 8.7$  Hz, 1H), 7.57 – 7.40 (m, 4H), 7.34 (td,  $J = 7.9, 6.5, 3.6$  Hz, 1H), 7.21 (d,  $J = 8.9$  Hz, 1H), 6.74 (d,  $J = 5.9$  Hz, 1H), 5.97 (dd,  $J = 5.9, 2.9$  Hz, 1H), 5.43 (d,  $J = 2.9$  Hz, 1H).

$^{13}\text{C NMR}$  (100 MHz,  $\text{CDCl}_3$ )  $\delta$  155.08, 146.43, 144.15, 140.99, 134.95, 130.35, 130.10, 129.96, 129.48, 129.15, 128.01, 127.85, 127.43, 123.36, 121.93, 121.67, 120.88, 118.57, 114.51, 95.63, 88.65, 70.85.

**HRMS (ESI)**  $m/z$  Calcd for  $\text{C}_{22}\text{H}_{12}\text{BrINaOS}^+$  [ $\text{M} + \text{Na}$ ] $^+$ : 552.8729, Found: 552.8729.

**HPLC analysis:** Chiralcel OD-H (Hexane/*i*-PrOH = 93:7, flow rate = 1.0 mL/min, wave length = 254 nm),  $t_R = 5.673$  min (minor),  $t_R = 6.113$  min (major), 27% ee

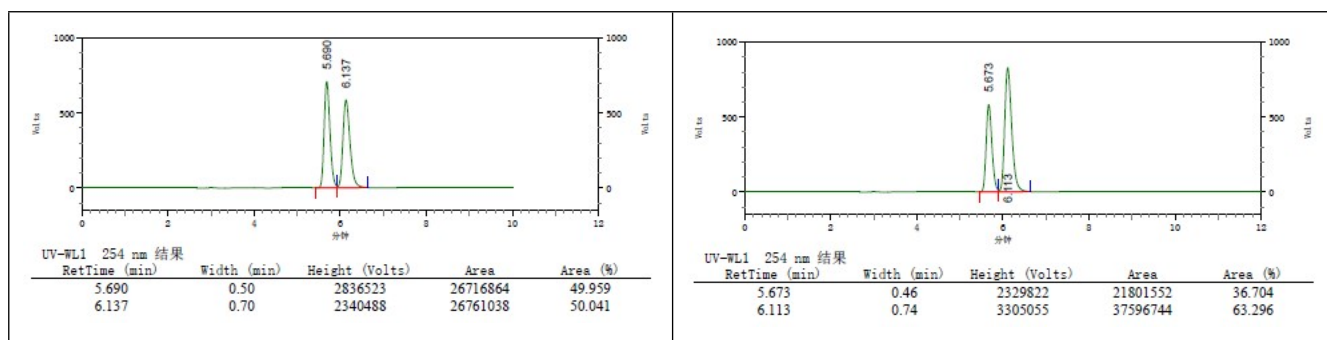

## IX. Rotational barriers of 2I, 4I

**2I** used for racemization experiment was obtained by a 1-mmol-scale reaction in 92.16% ee, 82% yield (337.0 mg, 1.0 mmol scale) under condition [A].

The enantiomerisation barrier of **2I**, corresponding to the barrier to rotation for the following atropisomers, was obtained by kinetic of racemization of an enantiomer. The slope of the first order kinetic line gives the racemization constant ( $K_{\text{racemization}} = 2 \times K_{\text{enantiomerisation}}$ ). Eyring equation gives the enantiomerization barrier ( $\Delta G^{\ddagger}_{\text{enantiomerization}}$ ) from enantiomerisation constant ( $K_{\text{enantiomerization}}$ ),  $R = 8.31451 \text{ J}\cdot\text{K}^{-1}\cdot\text{mol}^{-1}$ ,  $h = 6.62608 \times 10^{-34} \text{ Js}$  and  $k_B = 1.38066 \times 10^{-23} \text{ J}\cdot\text{K}^{-1}$ . Reactions were conducted at 20 mg/mL concentration. Enantiomeric excess values were determined by HPLC.

$$\Delta G^{\ddagger}_{\text{enantiomerization}} = RT \times \ln \frac{k_B \times T}{hK_{\text{enantiomerisation}}}$$

$$t_{1/2} = \ln 2 / K_{\text{racemization}}$$

### Racemization of 2I in xylene at 120 °C.

| Times (s) | ee (%) | $\ln(\text{ee}_0/\text{ee}_t)$ |
|-----------|--------|--------------------------------|
| 0         | 92.16  | 0                              |
| 14400     | 92.15  | 0.000108513                    |
| 43200     | 92.08  | 0.000868433                    |
| 86400     | 92.04  | 0.001302932                    |
| 172800    | 91.9   | 0.002825168                    |
| 259200    | 91.7   | 0.005003818                    |
| 432000    | 91.48  | 0.007405828                    |

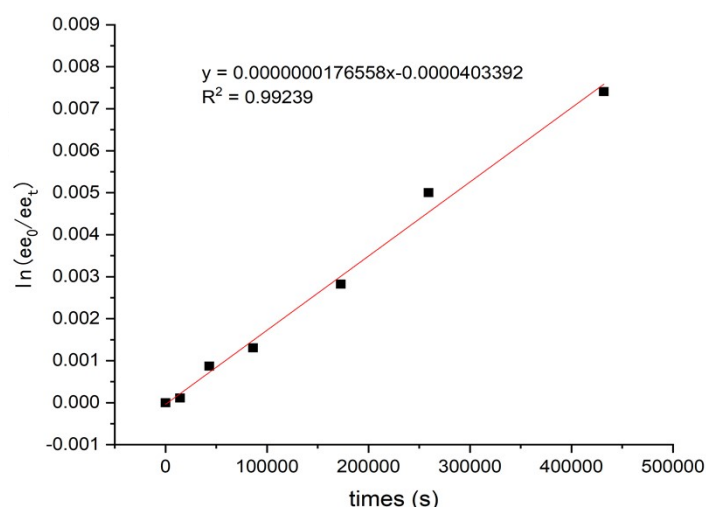



$K_{\text{racemization}} (120\text{ }^{\circ}\text{C}) = 1.8 \times 10^{-8} \text{ s}^{-1}$ ;  $t_{1/2} = 10905 \text{ h}$

$K_{\text{enantiomerization}} (120\text{ }^{\circ}\text{C}) = 8.8 \times 10^{-9} \text{ s}^{-1}$ ;  $\Delta G^{\ddagger}_{\text{enantiomerization}} = 37.7 \text{ kcal/mol}$

Product **4I** decomposed after react at 100 °C for 24h, so the rotational barriers of **4I** was only carried out by DFT calculation.

The DFT calculation focuses on the axis of **4I**, the racemization of central chirality was not concerned.

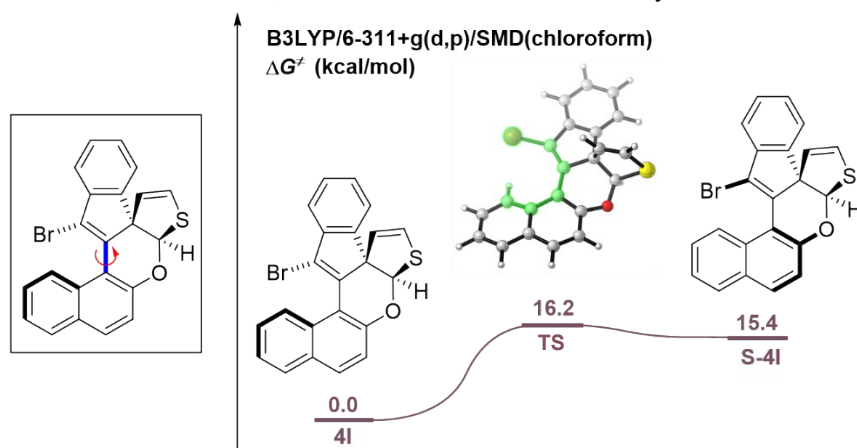

| Geometry    | $E_{\text{(elec-B3-LYP-D3)}}^1$ | $G_{\text{(corr-B3-LYP-D3)}}^2$ | $H_{\text{(corr-B3-LYP-D3)}}^3$ | $E_{\text{(solv-M06-2X)}}^4$ | IF <sup>5</sup> |
|-------------|---------------------------------|---------------------------------|---------------------------------|------------------------------|-----------------|
| <b>4I</b>   | -3891.017                       | 0.236304                        | 0.303562                        | -3893.620944                 |                 |
| <b>TS</b>   | -3890.991                       | 0.238359                        | 0.302253                        | -3893.593855                 | 31.6i           |
| <b>S-4I</b> | -3890.992                       | 0.236181                        | 0.302945                        | -3893.595772                 |                 |

<sup>1</sup>The electronic energy calculated by B3-LYP-D3 in chloroform solvent. <sup>2</sup>The thermal correction to Gibbs free energy calculated by B3-LYP-D3 in chloroform solvent. <sup>3</sup>The thermal correction to enthalpy calculated by B3-LYP-D3 in chloroform solvent. <sup>4</sup>The electronic energy calculated by M06-2X in chloroform solvent. <sup>5</sup>The B3-LYP-D3 calculated imaginary frequencies for the transition states.

#### Cartesian coordinates of the structures

|           |             |             |             |   |             |             |             |
|-----------|-------------|-------------|-------------|---|-------------|-------------|-------------|
| <b>4I</b> |             |             |             | H | -2.02774300 | 1.86254500  | -1.57340000 |
| Br        | 0.15045800  | -2.91818300 | -0.67725100 | C | 2.31811100  | 2.29853400  | -1.39729000 |
| S         | -1.60678000 | 3.64433900  | 0.03158700  | H | 2.24616300  | 3.18107400  | -2.02448900 |
| O         | -0.03792200 | 2.11881800  | -1.55878800 | C | -4.48716000 | -1.90959100 | 0.18563700  |
| C         | -2.18120300 | -1.27654900 | 0.02488500  | H | -5.26137500 | -2.67128900 | 0.15083900  |
| C         | -2.53520300 | 0.06324800  | 0.27595200  | C | -4.83786500 | -0.57885000 | 0.44449300  |
| C         | 3.60127300  | 0.66503600  | -0.12288700 | H | -5.88005500 | -0.31866400 | 0.60751100  |
| C         | 1.14575800  | 0.46976900  | -0.26026200 | C | 4.84465800  | 0.18821700  | 0.37327200  |
| C         | -3.85679400 | 0.42197900  | 0.49858200  | H | 5.75497800  | 0.70157100  | 0.07242800  |
| H         | -4.12334500 | 1.45427300  | 0.70877800  | C | -1.08673700 | 1.60530600  | 1.62161900  |
| C         | 1.13007000  | 1.63186300  | -1.02817200 | H | -0.86775400 | 1.01980000  | 2.50807500  |
| C         | 2.39229000  | -0.01078000 | 0.25366200  | C | 2.48067500  | -1.09813400 | 1.16327700  |
| C         | -0.72969800 | -1.32137300 | -0.16476300 | H | 1.57008000  | -1.58078900 | 1.49861400  |
| C         | -1.27847900 | 0.91625500  | 0.28464700  | C | -3.15290700 | -2.27469100 | -0.02543700 |
| C         | -1.25493800 | 2.02515200  | -0.82322600 | H | -2.87884100 | -3.30683300 | -0.22277900 |

|   |             |             |             |
|---|-------------|-------------|-------------|
| C | 3.52821900  | 1.80891900  | -0.96506300 |
| H | 4.45006800  | 2.31087000  | -1.24742400 |
| C | -0.17277100 | -0.09569800 | -0.02275600 |
| C | 4.89899900  | -0.88962400 | 1.22948400  |
| H | 5.85509300  | -1.24319500 | 1.60554800  |
| C | -1.24476000 | 2.92948800  | 1.61446700  |
| H | -1.18178300 | 3.58591800  | 2.47650300  |
| C | 3.70235000  | -1.52823500 | 1.63572300  |
| H | 3.74700900  | -2.36029500 | 2.33345400  |

**4I-TS**

|    |             |             |             |
|----|-------------|-------------|-------------|
| Br | 0.33697800  | -3.00345800 | 0.30240000  |
| S  | -2.44979700 | 3.32228500  | 0.02526500  |
| O  | -0.05130500 | 2.71934800  | -0.83061100 |
| C  | -1.99802000 | -1.42315100 | -0.13559400 |
| C  | -2.50504500 | -0.11660000 | -0.19505600 |
| C  | 3.62845800  | 1.07324200  | 0.10266100  |
| C  | 1.18246500  | 0.67434700  | -0.24978300 |
| C  | -3.87055900 | 0.11476700  | -0.31234800 |
| H  | -4.26572600 | 1.12429500  | -0.33751100 |
| C  | 1.06753500  | 2.06723300  | -0.41252700 |
| C  | 2.54733100  | 0.16741700  | -0.17486900 |
| C  | -0.53830900 | -1.34399000 | -0.04760900 |
| C  | -1.34375300 | 0.83617600  | 0.02209000  |
| C  | -1.33405700 | 2.10517300  | -0.82630100 |
| H  | -1.66486300 | 1.95249900  | -1.85641900 |
| C  | 2.14667800  | 2.95828100  | -0.19053400 |
| H  | 1.94364600  | 4.02141200  | -0.26522100 |
| C  | -4.22763800 | -2.29234600 | -0.33131100 |
| H  | -4.90932500 | -3.13649900 | -0.38982600 |
| C  | -4.73107400 | -0.98795500 | -0.39671800 |
| H  | -5.79944000 | -0.82577700 | -0.50906200 |
| C  | 4.95107000  | 0.58209600  | 0.24935500  |
| H  | 5.73887600  | 1.29146300  | 0.49218500  |
| C  | -1.46634300 | 1.34681800  | 1.46717200  |
| H  | -1.17822900 | 0.71609300  | 2.30065000  |
| C  | 2.91046600  | -1.16716900 | -0.47476200 |
| H  | 2.16293000  | -1.84250100 | -0.85351100 |
| C  | -2.85686900 | -2.52416700 | -0.18999500 |
| H  | -2.46933700 | -3.53600500 | -0.13339200 |
| C  | 3.38247200  | 2.47376200  | 0.13343200  |
| H  | 4.20272500  | 3.15259500  | 0.35063900  |
| C  | -0.08071100 | -0.05304500 | -0.15289000 |
| C  | 5.24516200  | -0.74880600 | 0.04254300  |
| H  | 6.26358800  | -1.11313700 | 0.14440600  |

|   |             |             |             |
|---|-------------|-------------|-------------|
| C | -2.04757000 | 2.54251300  | 1.57730000  |
| H | -2.30121100 | 3.05309800  | 2.50023900  |
| C | 4.21307200  | -1.61757200 | -0.36566000 |
| H | 4.44075800  | -2.64998200 | -0.61808700 |

**S-4I**

|    |             |             |             |
|----|-------------|-------------|-------------|
| Br | 0.55513900  | -2.81016300 | 0.71913900  |
| S  | -2.70951700 | 3.17356000  | -0.05275900 |
| O  | -0.15189000 | 2.83726500  | -0.30941800 |
| C  | -1.86387400 | -1.51024700 | -0.18254100 |
| C  | -2.44861700 | -0.24651300 | -0.39546200 |
| C  | 3.61007500  | 1.11856900  | 0.00220200  |
| C  | 1.14326800  | 0.76925600  | -0.11215800 |
| C  | -3.78868800 | -0.13430500 | -0.73974800 |
| H  | -4.24974000 | 0.83713100  | -0.88156900 |
| C  | 1.01579600  | 2.16769600  | -0.11565500 |
| C  | 2.49482500  | 0.25350100  | -0.25699100 |
| C  | -0.44383000 | -1.31043800 | 0.10779700  |
| C  | -1.41350300 | 0.79546500  | 0.01019000  |
| C  | -1.33899100 | 2.13531100  | -0.71288400 |
| H  | -1.38283300 | 2.06565700  | -1.80354300 |
| C  | 2.12060700  | 3.02608900  | 0.10602500  |
| H  | 1.92762100  | 4.09156000  | 0.17783600  |
| C  | -3.96158100 | -2.56321400 | -0.68147700 |
| H  | -4.56064600 | -3.46165000 | -0.80276000 |
| C  | -4.53873100 | -1.30882100 | -0.90524600 |
| H  | -5.58078800 | -1.23952000 | -1.20488400 |
| C  | 4.93225000  | 0.61139900  | -0.08089000 |
| H  | 5.75812500  | 1.27968100  | 0.15159000  |
| C  | -1.81960900 | 1.19610800  | 1.44443500  |
| H  | -1.62411600 | 0.53278600  | 2.27935100  |
| C  | 2.78620800  | -1.03362200 | -0.77071800 |
| H  | 1.97991800  | -1.65159100 | -1.13584800 |
| C  | -2.61898000 | -2.67677400 | -0.30532900 |
| H  | -2.16991200 | -3.64875000 | -0.12701600 |
| C  | 3.37937100  | 2.50401000  | 0.23718700  |
| H  | 4.22536200  | 3.15385400  | 0.44485100  |
| C  | -0.08524900 | 0.00732200  | -0.02294000 |
| C  | 5.17239400  | -0.68167100 | -0.49649900 |
| H  | 6.18918600  | -1.05711900 | -0.57092300 |
| C  | -2.52700300 | 2.32510400  | 1.50950000  |
| H  | -2.99048100 | 2.74968300  | 2.39337200  |
| C  | 4.08532000  | -1.49243500 | -0.88460300 |
| H  | 4.26709200  | -2.48184000 | -1.29599500 |

## X. Pharmacological research

### Cell Culture

Six cancer cell lines A375, A549, HCT116, HeLa, HepG2, MCF-7 and human hepatocyte cell line L02 were used in this work. All cell lines were grown in Dulbecco's modified Eagle's medium (DMEM, Hyclone), except for A375, which was maintained in DMEM 12430 (Invitrogen) with sodium pyruvate (Invitrogen) added. All media were supplemented with 10% foetal bovine serum (FBS, BI), 100 units/mL of penicillin–streptomycin (Sigma-Aldrich), incubated at 37 °C in a humidified atmosphere containing 5% CO<sub>2</sub>.

### Anti-proliferation assay

The anti-proliferative activities of the prepared compounds against the mentioned cell lines were evaluated using a standard GI<sub>50</sub> assay. Cell lines were grown to log phase in DMEM supplemented with 10% foetal bovine serum. Cell suspensions were prepared and 100 μL/well dispensed into 96-well plates to give 2 x 10<sup>3</sup> cells/well. After incubation for 24 h, cells were treated with the target compounds at 0.39, 0.78, 1.56, 3.125, 6.25, 12.5, 25, and 50 μM and incubated for 48 h at 37 °C in a humidified atmosphere of 5% CO<sub>2</sub>. Afterwards, cell viability was assessed by the conventional 3-(4, 5-dimethylthiazol-2-yl)-2, 5-diphenyltetrazolium bromide (MTT) reduction assay carried out strictly according to the manufacturer's instructions (Sigma). The absorbance (OD<sub>570</sub>) was read on a Spectramax microplate reader (Molecular Devices, US). In all experiments, three replicate wells were used for each drug concentration. Each assay was performed at least three times.

**Table 3. IC<sub>50</sub> values of selected compounds toward cancer cells. Data are presented as the mean ± SD from at least three independent experiments.**

|           | A375       | A549       | HCT116     | HeLa       | HepG2      | MCF-7      | L02 |
|-----------|------------|------------|------------|------------|------------|------------|-----|
| <b>2a</b> | 3.89±0.77  | 15.45±2.12 | 11.21±1.71 | 6.8±1.18   | 9.9±1.25   | 8.77±1.33  | >50 |
| <b>2j</b> | 1.28±0.26  | 1.17±0.32  | 1.04±0.27  | 1.45±0.44  | 2.2±0.58   | 1.2±0.33   | >50 |
| <b>2l</b> | 2.02±0.43  | 7.06±0.95  | 2.15±0.25  | 5.34±0.48  | 4.76±0.47  | 4.03±0.30  | >50 |
| <b>2o</b> | 9.12±1.86  | 30.03±2.89 | 20.12±2.31 | 16.69±2.57 | 35.55±4.11 | 25.93±3.04 | >50 |
| <b>4a</b> | >50        | >50        | >50        | >50        | >50        | >50        | >50 |
| <b>4i</b> | >50        | >50        | >50        | >50        | >50        | >50        | >50 |
| <b>4l</b> | 40.59±5.02 | >50        | >50        | >50        | 38.27±3.93 | >50        | >50 |

## XI. Gram-scale preparation and transformations

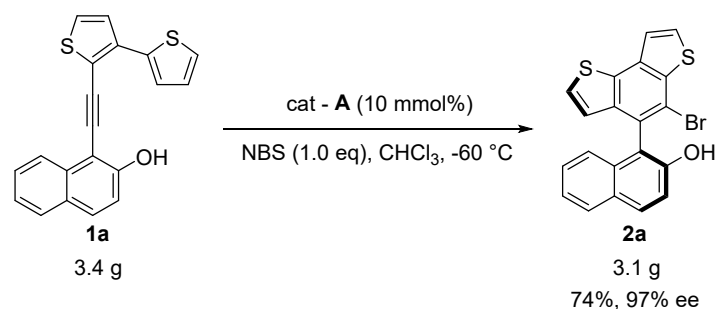

A solution of **1a** (3.4 g, 10.2 mmol, 1.0 equiv.) and catalyst-A (505 mg, 1.02 mmol, 10 mol%) in CHCl<sub>3</sub> (200 mL) was stirred at -60 °C for 30 min, then NBS (1.82 g, 10.2 mmol, 1.0 equiv.) was added in 10 portions. After stirring at -60 °C for 12 h, the reaction mixture was concentrated under reduced pressure. The resulting residue was purified by silica gel flash column chromatography using PE/EA eluent (10:1 to 4:1) to afford the product **2a** (3.1 g, 7.54 mmol, 74% yield) as a yellow solid.

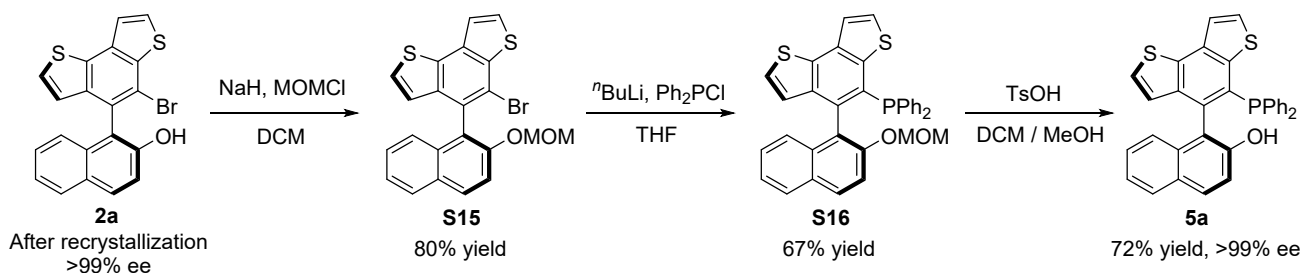

**2a** obtained in the Gram-scale reaction was further purified by recrystallization (DCM/hexane) to afford **2a** with higher enantiomeric excess as a white solid (2.8 g, >99% ee).

**2a** (2.06 g, 5 mmol, 1.0 equiv.) and NaH (240 mg, 10 mmol, 2.0 equiv.) was dissolved in DCM (20 mL) at room temperature under nitrogen atmosphere. MOMCl (0.45 ml, 6 mmol, 1.2 equiv.) was added dropwise. After stirred for 6 h at rt, the reaction was quenched with saturated aqueous  $\text{NH}_4\text{Cl}$ , extracted with DCM, washed with brine, dried over  $\text{Na}_2\text{SO}_4$  and filtered, concentrated under reduced pressure and purified by column chromatography on silica gel (PE/EA = 10:1) to afford the desired product **S15** (1.82 g, 4.0 mmol, 80% yield) as a white solid.  $^1\text{H NMR}$  (400 MHz,  $\text{CDCl}_3$ )  $\delta$  7.99 (d,  $J = 9.0$  Hz, 1H), 7.89 (d,  $J = 7.9$  Hz, 1H), 7.76 (d,  $J = 4.9$  Hz, 1H), 7.68 (d,  $J = 4.6$  Hz, 1H), 7.60 (d,  $J = 9.0$  Hz, 1H), 7.38 (t,  $J = 7.2$  Hz, 1H), 7.30 – 7.23 (m, 2H), 7.13 (d,  $J = 8.2$  Hz, 1H), 6.72 (d,  $J = 5.1$  Hz, 1H), 5.17 – 5.03 (m, 2H), 3.24 (s, 3H).  $^{13}\text{C NMR}$  (100 MHz,  $\text{CDCl}_3$ )  $\delta$  152.20, 138.91, 138.82, 133.31, 133.21, 132.93, 130.17, 129.53, 129.27, 127.98, 126.77, 124.92, 124.70, 124.18, 123.41, 122.74, 116.39, 115.12, 94.79, 56.00.

**HRMS (ESI)**  $m/z$  Calcd for  $\text{C}_{22}\text{H}_{15}\text{BrNaO}_2\text{S}_2^+$  [ $\text{M} + \text{Na}$ ] $^+$ : 476.9589, Found: 476.9589.

To an oven dried flask, **S15** (1.82 g, 4.0 mmol, 1.0 equiv.) was dissolved by dried THF under nitrogen atmosphere. The solvent was cooled to  $-78^\circ\text{C}$  and  $n\text{-BuLi}$  (1.6 M solution in hexanes, 3.0 ml, 4.8 mmol, 1.2 equiv) was added dropwise. The reaction mixture was held at  $-78^\circ\text{C}$  for 2 hours before  $\text{Ph}_2\text{PCl}$  (1.1 ml, 6.0 mmol, 1.5 equiv.) in dried THF was added slowly. The resulting solution was stirred at  $-78^\circ\text{C}$  for about 30 min, then allowed to warm to rt. After stirred overnight at rt, the mixture was quenched with water, extracted with EA, dried over anhydrous  $\text{Na}_2\text{SO}_4$ , and concentrated under reduced pressure. The crude product was purified by column chromatography (PE/EA = 8:1) to afford product **S16** (1.5 g, 2.68 mmol, 67% yield) as a white solid.  $^1\text{H NMR}$  (400 MHz,  $\text{CDCl}_3$ )  $\delta$  7.99 (d,  $J = 9.0$  Hz, 1H), 7.89 (d,  $J = 8.0$  Hz, 1H), 7.67 – 7.55 (m, 2H), 7.49 – 7.09 (m, 15H), 6.72 (d,  $J = 5.3$  Hz, 1H), 4.91 (d,  $J = 7.0$  Hz, 1H), 4.66 (d,  $J = 6.9$  Hz, 1H), 3.08 (s, 3H).  $^{13}\text{C NMR}$  (100 MHz,  $\text{CDCl}_3$ )  $\delta$  152.82, 141.13, 141.10, 138.21, 138.18, 138.12, 137.77, 136.36, 135.62, 135.48, 134.84, 134.70, 133.90, 133.73, 133.13, 132.94, 132.89, 132.70, 129.73, 129.17, 128.67, 128.01, 127.95, 127.85, 126.31, 126.18, 125.38, 125.31, 124.30, 124.19, 123.80, 123.76, 120.42, 115.62, 94.40, 55.36.

**HRMS (ESI)**  $m/z$  Calcd for  $\text{C}_{34}\text{H}_{25}\text{BrNaO}_2\text{S}_2^+$  [ $\text{M} + \text{Na}$ ] $^+$ : 583.0926, Found: 583.0928.

**S16** (1.5 g, 2.68 mmol, 1.0 equiv.) and TsOH (3.69 g, 21.4 mmol, 8.0 equiv.) were weighed and added into an oven dried schlenk tube, evacuated and backfilled with nitrogen (3 times). DCM (10 mL) and MeOH (2 mL) was injected into the flask. Then, the resulting solution was kept stirring for 8 hours. Quenched with aq.  $\text{Na}_2\text{CO}_3$ , extracted with DCM, washed with brine, dried over  $\text{Na}_2\text{SO}_4$  and filtered, concentrated under reduced pressure and purified by column chromatography on silica gel (PE/EA = 4:1) to afford the desired product **5a** (996 mg, 1.93 mmol, 72% yield) as a white solid.  $^1\text{H NMR}$  (400 MHz,  $\text{CDCl}_3$ )  $\delta$  7.87 (d,  $J = 8.9$  Hz, 1H), 7.80 (d,  $J = 8.1$  Hz, 1H), 7.60 (d,  $J = 5.5$  Hz, 1H), 7.49 (d,  $J = 5.5$  Hz, 1H), 7.36 (t,  $J = 6.9$  Hz, 2H), 7.23 (ddq,  $J = 33.6, 20.1, 7.0$  Hz, 11H), 7.07 (t,  $J = 7.6$  Hz, 1H), 6.95 (d,  $J = 8.4$  Hz, 1H), 6.70 (d,  $J = 5.4$  Hz, 1H), 4.73 (s, 1H).  $^{13}\text{C NMR}$  (100 MHz,  $\text{CDCl}_3$ )  $\delta$  150.91, 141.18, 138.44, 138.36, 137.03, 134.98, 134.86,

134.73, 134.59, 134.28, 133.88, 133.67, 133.44, 133.25, 133.06, 130.15, 129.72, 128.96, 128.75, 128.63, 128.48, 128.41, 128.33, 128.17, 128.11, 127.96, 126.39, 124.96, 124.94, 124.82, 123.28, 120.47, 119.93, 119.82, 117.29.

**HRMS (ESI)**  $m/z$  Calcd for  $C_{32}H_{21}NaOPS_2^+$   $[M + Na]^+$ : 539.0664, Found: 539.0664.

**HPLC analysis:** Chiralcel IB-H (Hexane/*i*-PrOH = 90:10, flow rate = 1.0 mL/min, wave length = 254 nm),  $t_R$  = 8.173 min (major),  $t_R$  = 9.090 min (minor), >99% ee

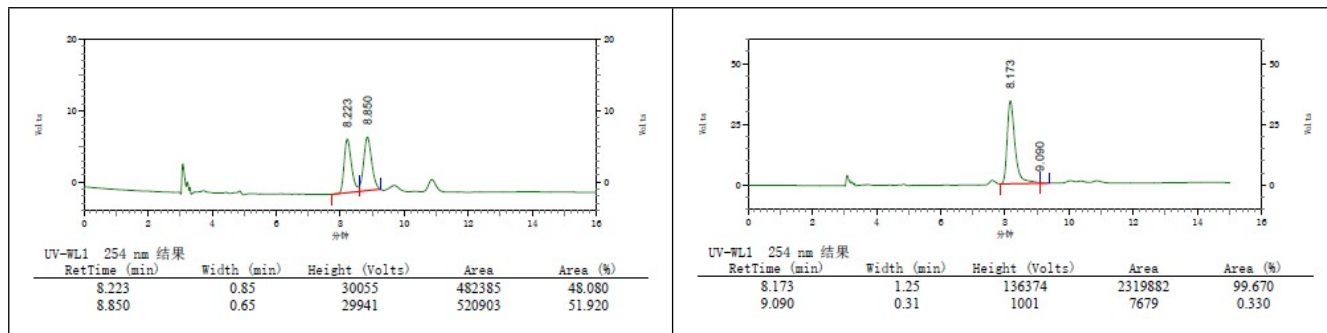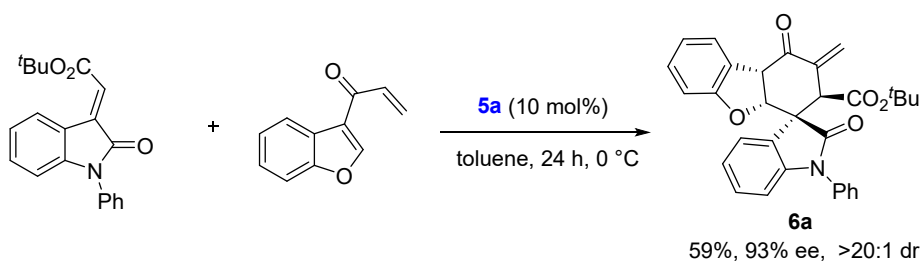

**Reaction condition:** A solution of **S17** (0.15 mmol, 1.5 equiv.), **S18** (0.1 mmol, 1.0 equiv.) and **5a** (0.01 mmol, 10 mol%) in toluene (1.0 mL) was stirred at 0 °C for 24 h under nitrogen atmosphere. The reaction mixture was concentrated under reduced pressure. The resulting residue was purified by silica gel flash column chromatography using PE/EA eluent to afford the product **6a**.

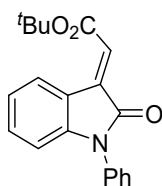

#### tert-butyl (*E*)-2-(2-oxo-1-phenylindolin-3-ylidene)acetate (**S17**)

Compound **S17** was synthesized following reference 7

Orange solid. ( $R_f$  = 0.5, PE/EA = 8:1)

**<sup>1</sup>H NMR** (400 MHz,  $CDCl_3$ )  $\delta$  8.62 (d,  $J$  = 7.7 Hz, 1H), 7.53 (t,  $J$  = 7.6 Hz, 2H), 7.40 (d,  $J$  = 8.1 Hz, 3H), 7.29 (d,  $J$  = 7.7 Hz, 1H), 7.10 (t,  $J$  = 7.7 Hz, 1H), 6.95 (s, 1H), 6.78 (d,  $J$  = 7.9 Hz, 1H), 1.59 (s, 9H).

**<sup>13</sup>C NMR** (100 MHz,  $CDCl_3$ )  $\delta$  167.13, 164.90, 145.65, 136.47, 133.97, 131.95, 129.66, 128.72, 128.22, 126.57, 125.40, 123.17, 119.93, 109.36, 81.97, 28.09.

**HRMS (ESI)**  $m/z$  Calcd for  $C_{20}H_{19}NNaO_3^+$   $[M + Na]^+$ : 344.1257, Found: 344.1257.

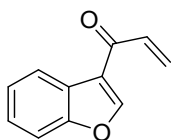

### 1-(benzofuran-3-yl)prop-2-en-1-one (S18)

Compound **S18** was synthesized following reference 7

White solid. ( $R_f = 0.4$ , PE/EA = 8:1)

$^1\text{H NMR}$  (400 MHz,  $\text{CDCl}_3$ )  $\delta$  8.42 – 8.12 (m, 2H), 7.60 – 7.46 (m, 1H), 7.44 – 7.30 (m, 2H), 6.93 (dd,  $J = 17.0, 10.5$  Hz, 1H), 6.49 (dd,  $J = 17.1, 1.6$  Hz, 1H), 5.86 (dd,  $J = 10.4, 1.6$  Hz, 1H).

$^{13}\text{C NMR}$  (100 MHz,  $\text{CDCl}_3$ )  $\delta$  185.16, 155.62, 151.03, 133.29, 128.58, 125.83, 124.55, 124.47, 123.02, 122.30, 111.42.

**HRMS (ESI)**  $m/z$  Calcd for  $\text{C}_{11}\text{H}_8\text{NaO}_2^+ [\text{M} + \text{Na}]^+$ : 195.0417, Found: 195.0416.

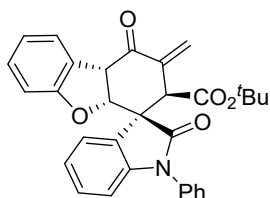

### tert-butyl (3R,4S,4aR,9bS)-2-methylene-1,2'-dioxo-1'-phenyl-2,3,4a,9b-tetrahydro-1H-spiro[dibenzo[b,d]furan-4,3'-indoline]-3-carboxylate (**6a**)

White solid. ( $R_f = 0.5$ , PE/EA = 4:1)

$^1\text{H NMR}$  (400 MHz,  $\text{CDCl}_3$ )  $\delta$  7.68 (d,  $J = 7.5$  Hz, 1H), 7.54 – 7.48 (m, 4H), 7.38 – 7.30 (m, 3H), 7.24 – 7.17 (m, 2H), 6.99 – 6.91 (m, 3H), 6.46 (d,  $J = 3.1$  Hz, 1H), 5.36 (d,  $J = 2.9$  Hz, 1H), 5.09 (d,  $J = 9.4$  Hz, 1H), 4.52 (d,  $J = 9.3$  Hz, 1H), 4.46 (d,  $J = 3.3$  Hz, 1H), 1.11 (s, 9H).

$^{13}\text{C NMR}$  (100 MHz,  $\text{CDCl}_3$ )  $\delta$  190.47, 174.35, 168.09, 159.02, 143.83, 136.90, 133.78, 129.76, 129.44, 129.20, 128.03, 127.50, 126.50, 126.09, 125.79, 124.27, 124.19, 123.10, 121.76, 109.69, 83.33, 82.26, 51.72, 50.78, 50.08, 27.38.

**HRMS (ESI)**  $m/z$  Calcd for  $\text{C}_{31}\text{H}_{27}\text{NNaO}_5^+ [\text{M} + \text{Na}]^+$ : 516.1781, Found: 516.1783.

**Optical Rotation:**  $[\alpha]_D^{25} = 21.5^\circ$  ( $c = 0.2$ ,  $\text{CHCl}_3$ ).

**HPLC analysis:** Chiralcel AD-H (Hexane/*i*-PrOH = 80:20, flow rate = 1.0 mL/min, wave length = 254 nm),  $t_R = 6.173$  min (major),  $t_R = 6.908$  min (minor), 93% ee

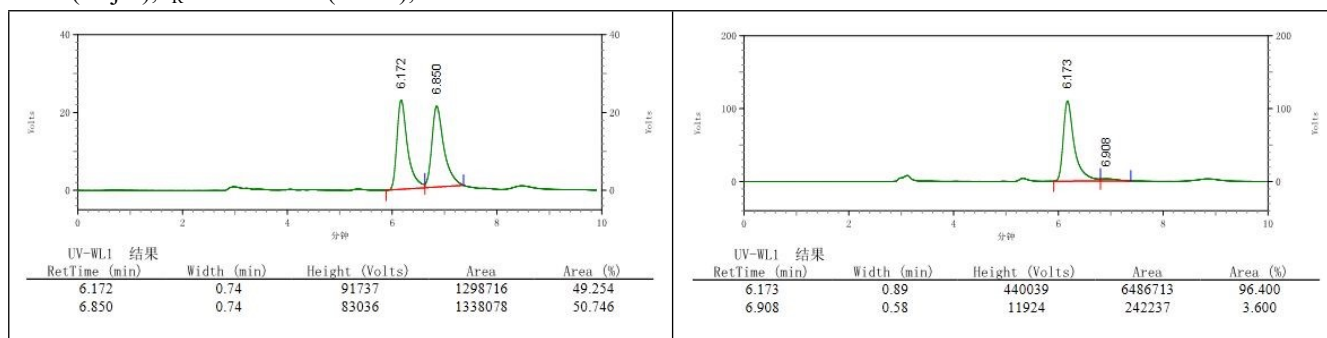

Product **5a** is a reported compound, the absolute configuration of chiral product **6a** was assigned according to reference 7.

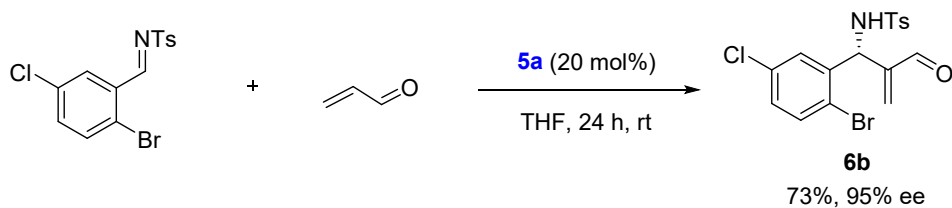

**Reaction condition:** To **S19** or **S20** (0.2 mmol, 1.0 equiv.) and **5a** (0.04 mmol, 20 mol%) in THF (2.0 ml) was added acrylaldehyde (27  $\mu$ l, 0.8 mmol, 4.0 equiv.) stirred at rt for 24 h under nitrogen atmosphere. The reaction mixture was concentrated under reduced pressure. The resulting residue was purified by silica gel flash column chromatography using PE/EA eluent to afford the product **6b** (62.2 mg, 73% yield) or **6c** (59.2 mg, 72% yield).

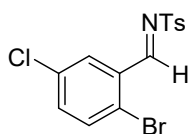

#### (*E*)-*N*-(2-bromo-5-chlorobenzylidene)-4-methylbenzenesulfonamide (**S19**)

Compound **S19** was synthesized following reference **8**

White solid. ( $R_f$  = 0.6, PE/EA = 5:1)

**<sup>1</sup>H NMR** (400 MHz, CDCl<sub>3</sub>)  $\delta$  9.37 (s, 1H), 8.19 (dd,  $J$  = 8.8, 6.1 Hz, 1H), 7.90 (d,  $J$  = 8.3 Hz, 2H), 7.41 (dd,  $J$  = 8.0, 2.5 Hz, 1H), 7.37 (d,  $J$  = 8.0 Hz, 2H), 7.14 – 7.08 (m, 1H), 2.45 (s, 3H).

**<sup>13</sup>C NMR** (100 MHz, CDCl<sub>3</sub>)  $\delta$  167.74, 145.10, 135.35, 134.80, 134.39, 134.16, 132.35, 130.03, 129.91, 128.31, 126.31, 77.00, 21.65.

**HRMS (ESI)**  $m/z$  Calcd for C<sub>14</sub>H<sub>11</sub>BrClNNaO<sub>2</sub>S<sup>+</sup> [M + Na]<sup>+</sup>: 393.9275, Found: 393.9272.

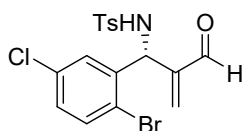

#### (*R*)-*N*-(1-(2-bromo-5-chlorophenyl)-2-formylallyl)-4-methylbenzenesulfonamide (**5b**)

White solid. ( $R_f$  = 0.6, PE/EA = 5:1)

**<sup>1</sup>H NMR** (400 MHz, CDCl<sub>3</sub>)  $\delta$  9.38 (s, 1H), 7.63 (d,  $J$  = 7.9 Hz, 2H), 7.35 – 7.30 (m, 1H), 7.24 – 7.12 (m, 3H), 6.85 (t,  $J$  = 7.1 Hz, 1H), 6.49 (s, 1H), 6.15 (s, 1H), 6.00 (d,  $J$  = 8.2 Hz, 1H), 5.69 (d,  $J$  = 8.2 Hz, 1H), 2.38 (s, 3H).

**<sup>13</sup>C NMR** (100 MHz, CDCl<sub>3</sub>)  $\delta$  192.74, 145.87, 143.71, 138.34, 137.77, 136.78, 134.09, 133.74, 129.50, 129.36, 127.12, 120.70, 77.00, 56.19, 21.48.

**HRMS (ESI)**  $m/z$  Calcd for C<sub>17</sub>H<sub>15</sub>BrClNNaO<sub>3</sub>S<sup>+</sup> [M + Na]<sup>+</sup>: 449.9537, Found: 449.9539.

**Optical Rotation:**  $[\alpha]_D^{25}$  = -62.7° ( $c$  = 0.3, CHCl<sub>3</sub>).

**HPLC analysis:** Chiralcel AD-H (Hexane/*i*-PrOH = 80:20, flow rate = 1.0 mL/min, wave length = 254 nm),  $t_R$  = 10.440 min (minor),  $t_R$  = 12.420 min (major), 95% ee

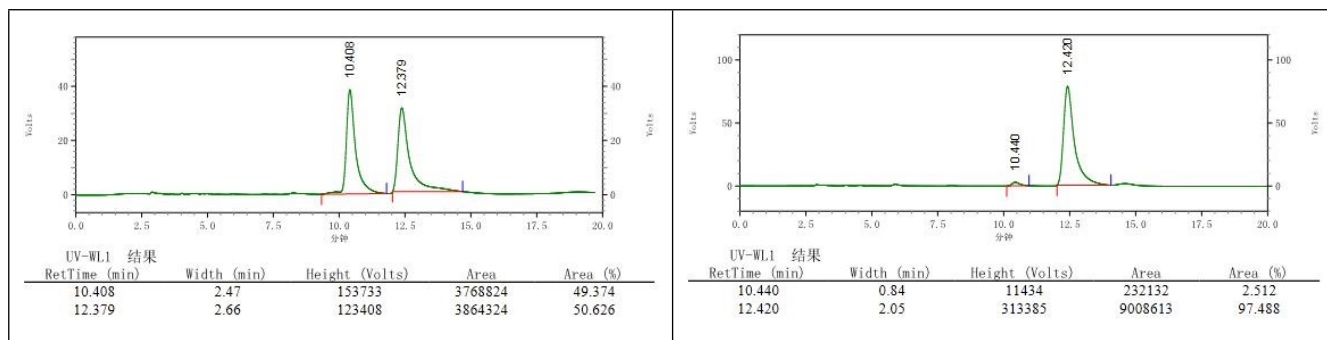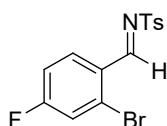

### (E)-N-(2-bromo-4-fluorobenzylidene)-4-methylbenzenesulfonamide (S20)

Compound **S20** was synthesized following reference **8**

White solid. ( $R_f$  = 0.6, PE/EA = 5:1)

$^1\text{H NMR}$  (400 MHz,  $\text{CDCl}_3$ )  $\delta$  9.37 (s, 1H), 8.19 (dd,  $J$  = 8.8, 6.1 Hz, 1H), 7.90 (d,  $J$  = 8.3 Hz, 2H), 7.41 (dd,  $J$  = 8.0, 2.5 Hz, 1H), 7.37 (d,  $J$  = 8.0 Hz, 2H), 7.14 – 7.08 (m, 1H), 2.45 (s, 3H).

$^{13}\text{C NMR}$  (100 MHz,  $\text{CDCl}_3$ )  $\delta$  167.66,  $\delta$  165.96 (d,  $J$  = 262.4 Hz), 144.88, 134.51, 132.55 (d,  $J$  = 9.9 Hz), 129.85, 129.67, 128.23, 127.69 (d,  $J$  = 3.1 Hz), 121.13 (d,  $J$  = 24.8 Hz), 115.83 (d,  $J$  = 21.7 Hz), 21.64.

**HRMS (ESI)**  $m/z$  Calcd for  $\text{C}_{14}\text{H}_{11}\text{BrFNNaO}_2\text{S}^+$  [ $\text{M} + \text{Na}$ ] $^+$ : 377.9570, Found: 377.9575.

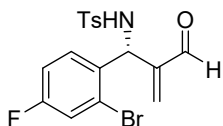

### (R)-N-(1-(2-bromo-4-fluorophenyl)-2-formylallyl)-4-methylbenzenesulfonamide (6c)

White solid. ( $R_f$  = 0.6, PE/EA = 5:1)

$^1\text{H NMR}$  (400 MHz,  $\text{CDCl}_3$ )  $\delta$  9.38 (s, 1H), 7.63 (d,  $J$  = 7.9 Hz, 2H), 7.35 – 7.30 (m, 1H), 7.24 – 7.12 (m, 3H), 6.85 (t,  $J$  = 7.1 Hz, 1H), 6.49 (s, 1H), 6.15 (s, 1H), 6.00 (d,  $J$  = 8.2 Hz, 1H), 5.69 (d,  $J$  = 8.2 Hz, 1H), 2.38 (s, 3H).

$^{13}\text{C NMR}$  (100 MHz,  $\text{CDCl}_3$ )  $\delta$  192.62, 161.53 (d,  $J$  = 251.8 Hz), 146.58, 143.61, 137.24, 136.78, 133.04 (d,  $J$  = 3.3 Hz), 130.38 (d,  $J$  = 8.5 Hz), 129.42, 127.20, 123.03 (d,  $J$  = 9.3 Hz), 120.08 (d,  $J$  = 24.6 Hz), 114.67 (d,  $J$  = 21.0 Hz), 55.26, 21.42.

**HRMS (ESI)**  $m/z$  Calcd for  $\text{C}_{17}\text{H}_{15}\text{BrFNNaO}_3\text{S}^+$  [ $\text{M} + \text{Na}$ ] $^+$ : 433.9832, Found: 433.9838.

**Optical Rotation:**  $[\alpha]_D^{25} = -2.5^\circ$  ( $c$  = 0.6,  $\text{CHCl}_3$ ).

**HPLC analysis:** Chiralcel IA-H (Hexane/*i*-PrOH = 80:20, flow rate = 1.0 mL/min, wave length = 254 nm),  $t_R$  = 11.363 min (minor),  $t_R$  = 11.983 min (major), 90% ee.



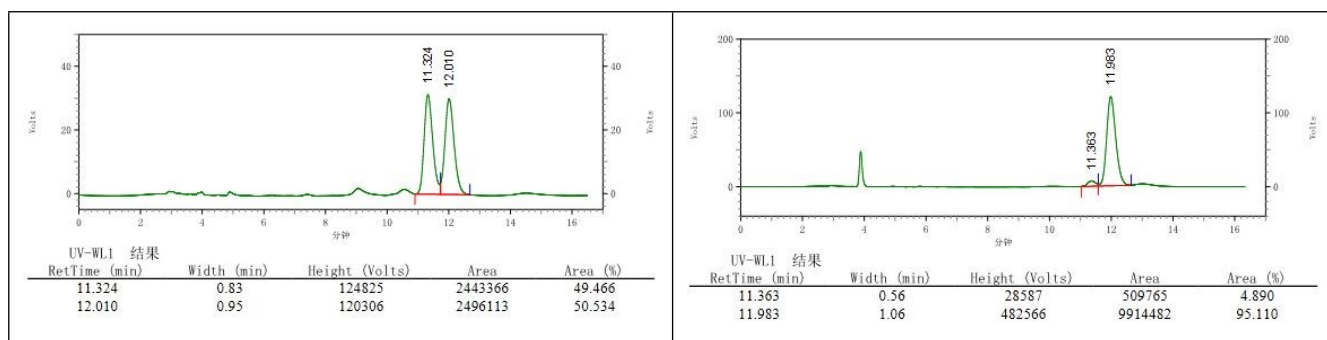

The absolute configuration of chiral product **6b**, **6c** was assigned by analogy to those reported by similar catalysis, see reference **9**.

## XII. Mechanistic studies

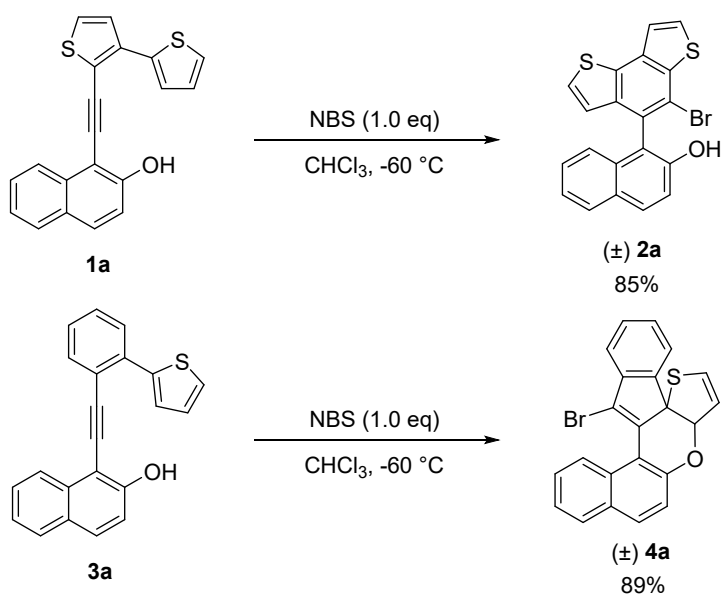

**Reaction condition:** A solution of **1** or **3** (0.2 mmol, 1.0 equiv.) in CHCl<sub>3</sub> (2 mL) was stirred at -60 °C for 30 min, then NBS (0.2 mmol, 1.0 equiv.) was added. After stirring at -60 °C for 3 h, the reaction mixture was concentrated under reduced pressure. The resulting residue was purified by silica gel flash column chromatography using PE/EA eluent to afford the product **2** or **4**.

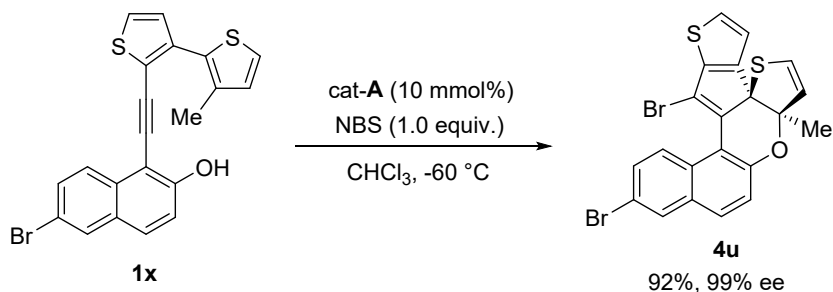

The control experiment was carried out following the general procedure (Condition [A]).

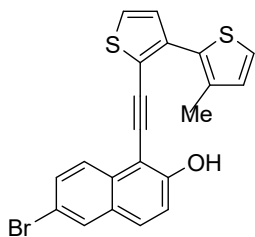

### 6-bromo-1-((3-methyl-[2,3'-bithiophen]-2'-yl)ethynyl)naphthalen-2-ol (**1x**)

Compound **1x** was synthesized following the general procedure (**Method B**).

Yellow solid. ( $R_f$  = 0.5, PE/EA = 6:1)

**<sup>1</sup>H NMR** (400 MHz, CDCl<sub>3</sub>) δ 7.85 (d, *J* = 2.0 Hz, 1H), 7.82 (d, *J* = 8.8 Hz, 1H), 7.58 (d, *J* = 9.0 Hz, 1H), 7.51 (dd, *J* = 8.8, 2.1 Hz, 1H), 7.35 (d, *J* = 5.2 Hz, 1H), 7.31 (d, *J* = 5.1 Hz, 1H), 7.14 (d, *J* = 4.9 Hz, 1H), 7.12 (s, 1H), 6.97 (d, *J* = 5.1 Hz, 1H), 6.14 (s, 1H), 2.29 (s, 3H).

**<sup>13</sup>C NMR** (100 MHz, CDCl<sub>3</sub>) δ 156.20, 138.78, 135.74, 131.68, 130.72, 130.50, 130.38, 130.09, 129.70, 129.42, 129.28, 126.78, 126.63, 124.54, 119.56, 117.78, 117.57, 102.93, 94.69, 88.14, 15.14.

**HRMS (ESI)** *m/z* Calcd for C<sub>21</sub>H<sub>13</sub>BrNaOS<sub>2</sub><sup>+</sup> [M + Na]<sup>+</sup>: 446.9483, Found: 446.9483.

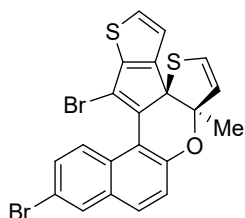

**(3*b*R,6*a*R)-11,14-dibromo-6*a*-methyl-6*a*H-benzo[*f*]thieno[2',3':4,5]cyclopenta[1,2-*c*]thieno[3,2-*b*]chromene (4*u*)**

Compound **4u** was synthesized in 92% yield (138.8 mg, 0.3 mmol scale) under condition [A].

Yellow oil. (*R<sub>f</sub>* = 0.5, PE/EA = 20:1)

**<sup>1</sup>H NMR** (400 MHz, CDCl<sub>3</sub>) δ 7.94 (s, 1H), 7.84 (d, *J* = 9.0 Hz, 1H), 7.65 (d, *J* = 8.9 Hz, 1H), 7.57 (dd, *J* = 9.0, 2.1 Hz, 1H), 7.31 (d, *J* = 4.9 Hz, 1H), 7.16 (d, *J* = 8.9 Hz, 1H), 7.08 (d, *J* = 4.9 Hz, 1H), 6.62 (d, *J* = 5.9 Hz, 1H), 5.84 (d, *J* = 5.9 Hz, 1H), 1.35 (s, 3H).

**<sup>13</sup>C NMR** (100 MHz, CDCl<sub>3</sub>) δ 155.67, 149.27, 146.44, 136.85, 131.21, 130.59, 130.19, 129.33, 129.24, 128.48, 128.18, 127.93, 127.86, 121.80, 118.88, 117.60, 112.59, 111.74, 93.47, 69.21, 22.80.

**HRMS (ESI)** *m/z* Calcd for C<sub>21</sub>H<sub>12</sub>Br<sub>2</sub>NaOS<sub>2</sub><sup>+</sup> [M + Na]<sup>+</sup>: 524.8589, Found: 524.8593.

**HPLC analysis:** Chiralcel IA-H (Hexane/*i*-PrOH = 95:5, flow rate = 1.0 mL/min, wave length = 254 nm), *t<sub>R</sub>* = 5.228 min (minor), *t<sub>R</sub>* = 5.918 min (major), 99% ee

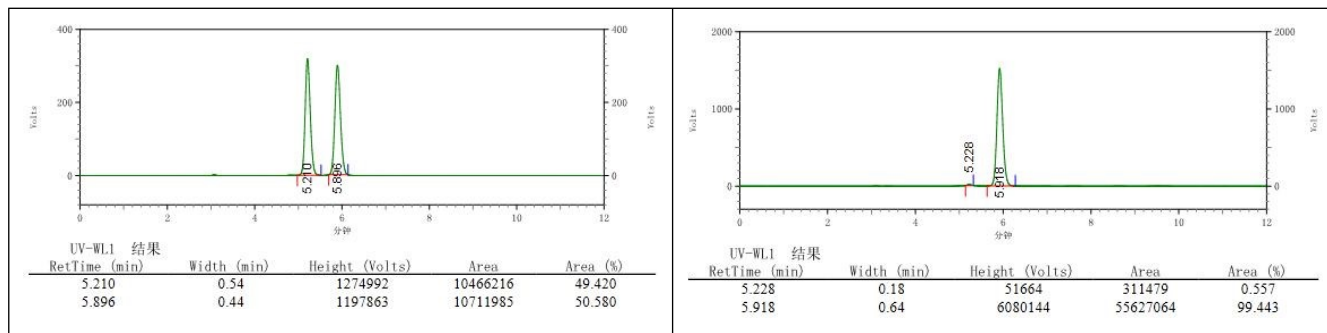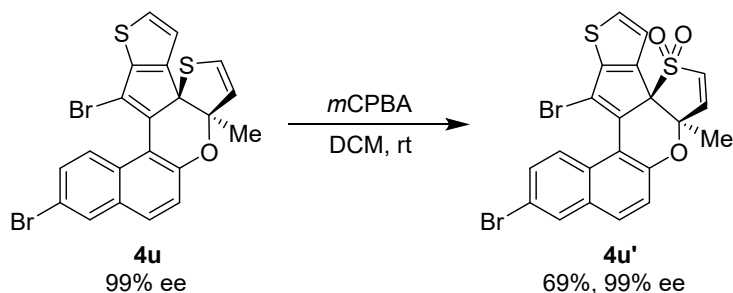

**4u** (126 mg, 0.25 mmol, 1.0 equiv) and *m*CPBA (172 mg, 1.0 mmol, 4.0 equiv) were weighed and added into a flask, DCM (2 mL) added into the flask. Then, the resulting solution was kept stirring for 8 hours. Quenched with aq. Na<sub>2</sub>CO<sub>3</sub>, extracted with DCM, washed with brine, dried over Na<sub>2</sub>SO<sub>4</sub> and filtered, concentrated under reduced pressure and purified by column chromatography on silica gel (PE/EA = 4:1) to afford the desired product **4u'** (92 mg, 0.17 mmol, 69% yield).

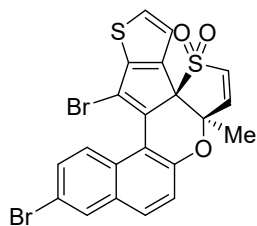

**(3*b*R,6*a*R)-11,14-dibromo-6*a*-methyl-6*a*H-benzo[*f*]thieno[2',3':4,5]cyclopenta[1,2-*c*]thieno[3,2-*b*]chromene 4,4-dioxide (**4u'**)**

white solid. (*R*<sub>f</sub> = 0.4, PE/EA = 4:1)

<sup>1</sup>H NMR (400 MHz, CDCl<sub>3</sub>) δ 7.98 (s, 1H), 7.93 (d, *J* = 8.9 Hz, 1H), 7.71 (d, *J* = 8.8 Hz, 1H), 7.64 (dd, *J* = 8.9, 2.0 Hz, 1H), 7.42 (d, *J* = 4.9 Hz, 1H), 7.25 – 7.16 (m, 2H), 6.64 (d, *J* = 6.8 Hz, 1H), 6.56 (d, *J* = 6.9 Hz, 1H), 1.82 (s, 3H).

<sup>13</sup>C NMR (100 MHz, CDCl<sub>3</sub>) δ 151.79, 150.60, 141.39, 139.30, 134.08, 132.61, 131.73, 130.27, 130.09, 129.82, 129.04, 127.84, 127.20, 125.68, 119.34, 118.65, 118.13, 116.15, 83.64, 82.60, 25.01.

**HRMS (ESI)** *m/z* Calcd for C<sub>21</sub>H<sub>12</sub>Br<sub>2</sub>NaO<sub>3</sub>S<sub>2</sub><sup>+</sup> [*M* + Na]<sup>+</sup>: 556.8487, Found: 556.8487.

**HPLC analysis:** Chiralcel IA-H (Hexane/*i*-PrOH = 70:30, flow rate = 1.0 mL/min, wave length = 254 nm), *t*<sub>R</sub> = 6.744 min (minor), *t*<sub>R</sub> = 7.408 min (major), 99% ee

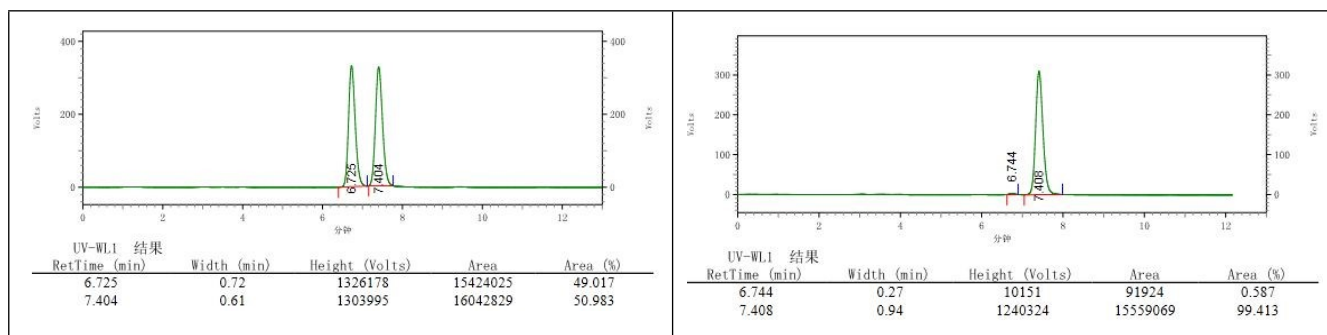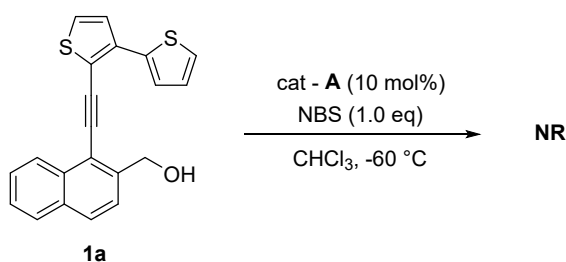

The control experiment was carried out following the general procedure (Condition [A]). After stirred at -60°C for 24h, monitored by TLC, no reaction was observed.

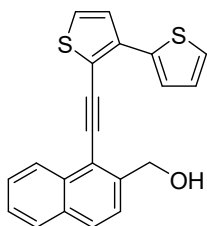

**(1-([2,3'-bithiophen]-2'-ylethynyl)naphthalen-2-yl)methanol (7)**

1-bromo-2-naphthaldehyde (705 mg, 3.0 mmol, 1.0 equiv), PdCl<sub>2</sub>(PPh<sub>3</sub>)<sub>2</sub> (70 mg, 0.1 mmol, 0.03 equiv) and CuI (30 mg, 0.16 mmol, 0.05 equiv) were weighed and added into an oven dried flask, evacuated and backfilled with nitrogen (3 times). **S2** (680 mg, 3.6 mmol, 1.2 equiv) in Et<sub>3</sub>N (5 mL) and THF (5 mL) was injected into the flask. The mixture was heated to 70 °C for 3 h. Then the mixture was allowed to cool to rt, filtered through a pad of celite and washed with EA. Remove solvent under reduced pressure, purified by column chromatography on silica gel (PE/EA = 10:1) to afford the aldehyde. The aldehyde was dissolved in MeOH (5 mL) and DCM (5 mL), NaBH<sub>4</sub> (227mg, 6.0 mmol, 2.0 equiv) was added. After stirred at rt for 1h, the mixture was quenched by NH<sub>4</sub>Cl. Extracted by DCM, remove solvent under reduced pressure. **7** was obtained without further purification. <sup>1</sup>H NMR (400 MHz, CDCl<sub>3</sub>) δ 8.44 (d, *J* = 8.3 Hz, 1H), 7.87 (t, *J* = 8.7 Hz, 2H), 7.73 – 7.62 (m, 2H), 7.55 (dt, *J* = 21.7, 7.2 Hz, 2H), 7.41 – 7.26 (m, 3H), 7.10 (t, *J* = 4.4 Hz, 1H), 5.11 (s, 2H), 2.06 (s, 1H). <sup>13</sup>C NMR (100 MHz, CDCl<sub>3</sub>) δ 141.55, 137.80, 137.68, 133.23, 132.55, 129.29, 128.20, 127.40, 127.28, 127.25, 127.14, 126.39, 126.27, 125.61, 125.26, 125.20, 117.98, 116.63, 93.31, 92.61, 64.23. HRMS (ESI) *m/z* Calcd for C<sub>21</sub>H<sub>14</sub>NaOS<sub>2</sub><sup>+</sup> [M + Na]<sup>+</sup>: 369.0378, Found: 369.0378.

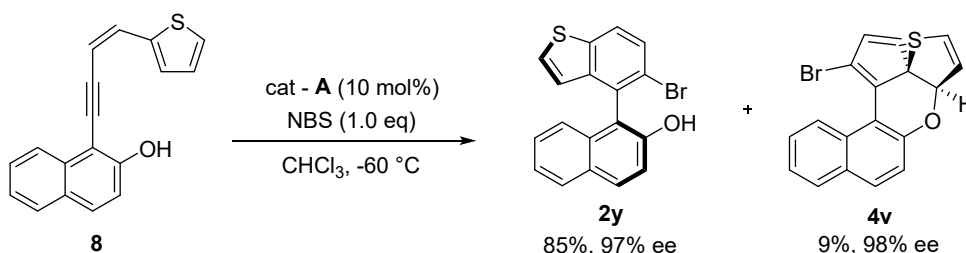

The control experiment was carried out following the general procedure (Condition [A]).

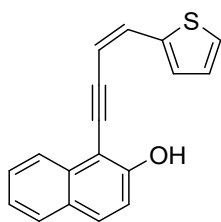

**(Z)-1-(4-(thiophen-2-yl)but-3-en-1-yn-1-yl)naphthalen-2-ol (8)**

Compound **8** was synthesized following the general procedure (**Method D**).

White solid. (*R<sub>f</sub>* = 0.5, PE/EA = 6:1)

<sup>1</sup>H NMR (400 MHz, CDCl<sub>3</sub>) δ 8.23 (d, *J* = 8.4 Hz, 1H), 7.81 – 7.71 (m, 2H), 7.53 (dd, *J* = 8.4, 6.7 Hz, 1H), 7.37 (t, *J* = 7.5 Hz, 1H), 7.32 (d, *J* = 5.1 Hz, 1H), 7.26 (d, *J* = 3.6 Hz, 1H), 7.21 (d, *J* = 9.1 Hz, 1H), 7.08 – 7.01 (m, 1H), 6.99 (d, *J* = 11.4 Hz, 1H), 6.60 (s, 1H), 5.96 (d, *J* = 11.4 Hz, 1H).

$^{13}\text{C}$  NMR (100 MHz,  $\text{CDCl}_3$ )  $\delta$  156.25, 140.25, 133.57, 131.87, 131.08, 129.97, 128.45, 128.26, 127.43, 126.82, 126.71, 124.97, 124.10, 116.53, 104.30, 103.05, 99.40, 91.48.

**HRMS (ESI)**  $m/z$  Calcd for  $\text{C}_{18}\text{H}_{12}\text{NaOS}^+$  [ $\text{M} + \text{Na}$ ] $^+$ : 299.0501, Found: 299.0500.

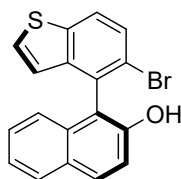

### (aS)-1-(5-bromobenzo[b]thiophen-4-yl)naphthalen-2-ol (2y)

Compound **2y** was synthesized in 85% yield (90.2 mg, 0.3 mmol scale) under condition [A].

Purple oil. ( $R_f$  = 0.5, PE/EA = 6:1)

$^1\text{H}$  NMR (400 MHz,  $\text{CDCl}_3$ )  $\delta$  7.87 (dd,  $J$  = 16.4, 8.8 Hz, 3H), 7.71 (d,  $J$  = 8.6 Hz, 1H), 7.37 – 7.23 (m, 4H), 7.04 (d,  $J$  = 8.2 Hz, 1H), 6.65 (d,  $J$  = 5.5 Hz, 1H), 4.89 (s, 1H).

$^{13}\text{C}$  NMR (100 MHz,  $\text{CDCl}_3$ )  $\delta$  150.36, 141.91, 139.20, 132.42, 130.43, 129.78, 128.91, 128.75, 128.15, 126.86, 124.20, 123.70, 123.57, 122.22, 118.43, 117.57.

**HRMS (ESI)**  $m/z$  Calcd for  $\text{C}_{18}\text{H}_{11}\text{BrNaOS}^+$  [ $\text{M} + \text{Na}$ ] $^+$ : 376.9606, Found: 376.9608.

**HPLC analysis:** Chiralcel IBIB-H (Hexane/*i*-PrOH = 90:10, flow rate = 1.0 mL/min, wave length = 254 nm),  $t_R$  = 19.375 min (minor),  $t_R$  = 20.872 min (major), 97% ee

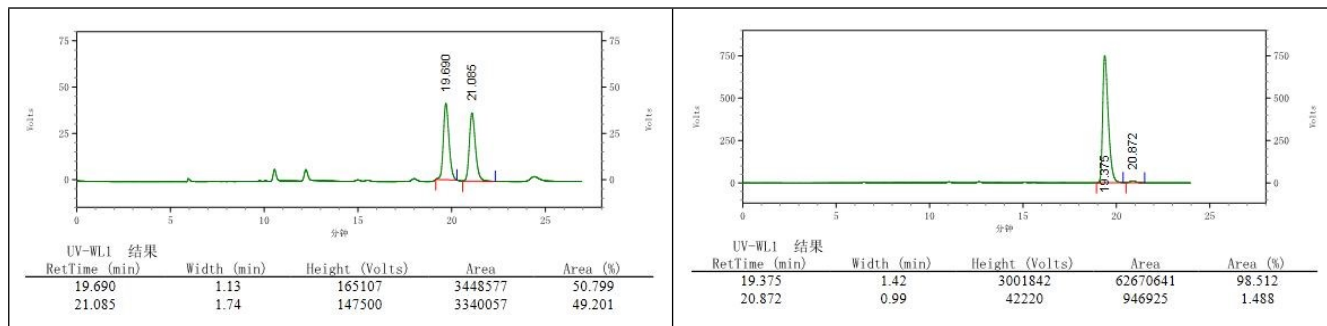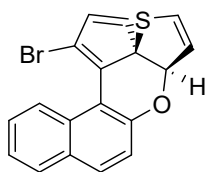

### (3aR,6aR)-1-bromo-6aH-benzo[f]cyclopenta[c]thieno[3,2-b]chromene (4v)

Compound **4v** was synthesized in 9% yield (9.8 mg, 0.3 mmol scale) under condition [A].

Purple oil. ( $R_f$  = 0.5, PE/EA = 20:1)

$^1\text{H}$  NMR (400 MHz,  $\text{CDCl}_3$ )  $\delta$  7.93 (d,  $J$  = 8.4 Hz, 1H), 7.76 (dd,  $J$  = 16.4, 8.5 Hz, 2H), 7.52 (t,  $J$  = 7.6 Hz, 1H), 7.38 (t,  $J$  = 7.5 Hz, 1H), 7.17 (d,  $J$  = 8.8 Hz, 1H), 6.70 – 6.51 (m, 3H), 6.04 (dd,  $J$  = 5.8, 3.0 Hz, 1H), 5.13 (d,  $J$  = 3.0 Hz, 1H).

$^{13}\text{C}$  NMR (100 MHz,  $\text{CDCl}_3$ )  $\delta$  153.57, 138.32, 135.74, 133.79, 133.71, 130.18, 129.32, 129.17, 128.21, 126.99, 126.05, 123.86, 123.42, 117.53, 116.83, 111.79, 84.61, 70.69.

**HRMS (ESI)**  $m/z$  Calcd for  $\text{C}_{18}\text{H}_{11}\text{BrNaOS}^+$  [ $\text{M} + \text{Na}$ ] $^+$ : 376.9606, Found: 376.9606.

**HPLC analysis:** Chiralcel IA-H (Hexane/*i*-PrOH = 95:5, flow rate = 1.0 mL/min, wave length = 254 nm),  $t_R = 4.760$  min (minor),  $t_R = 5.699$  min (major), 98% ee

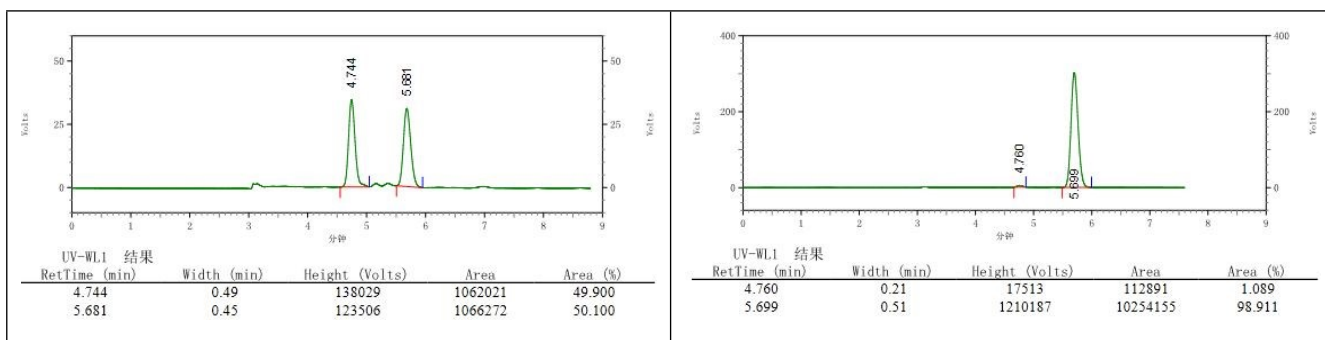

### XIII. $^1\text{H}$ and $^{13}\text{C}$ NMR spectra

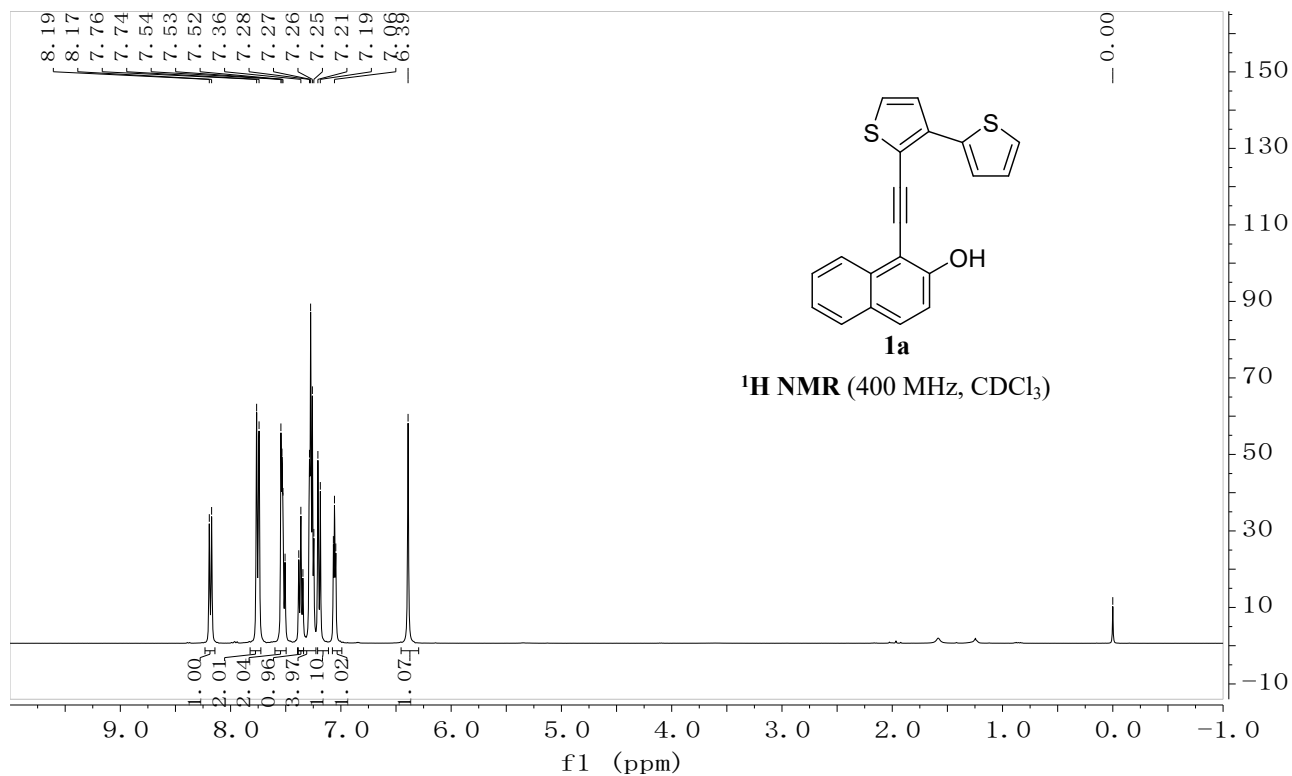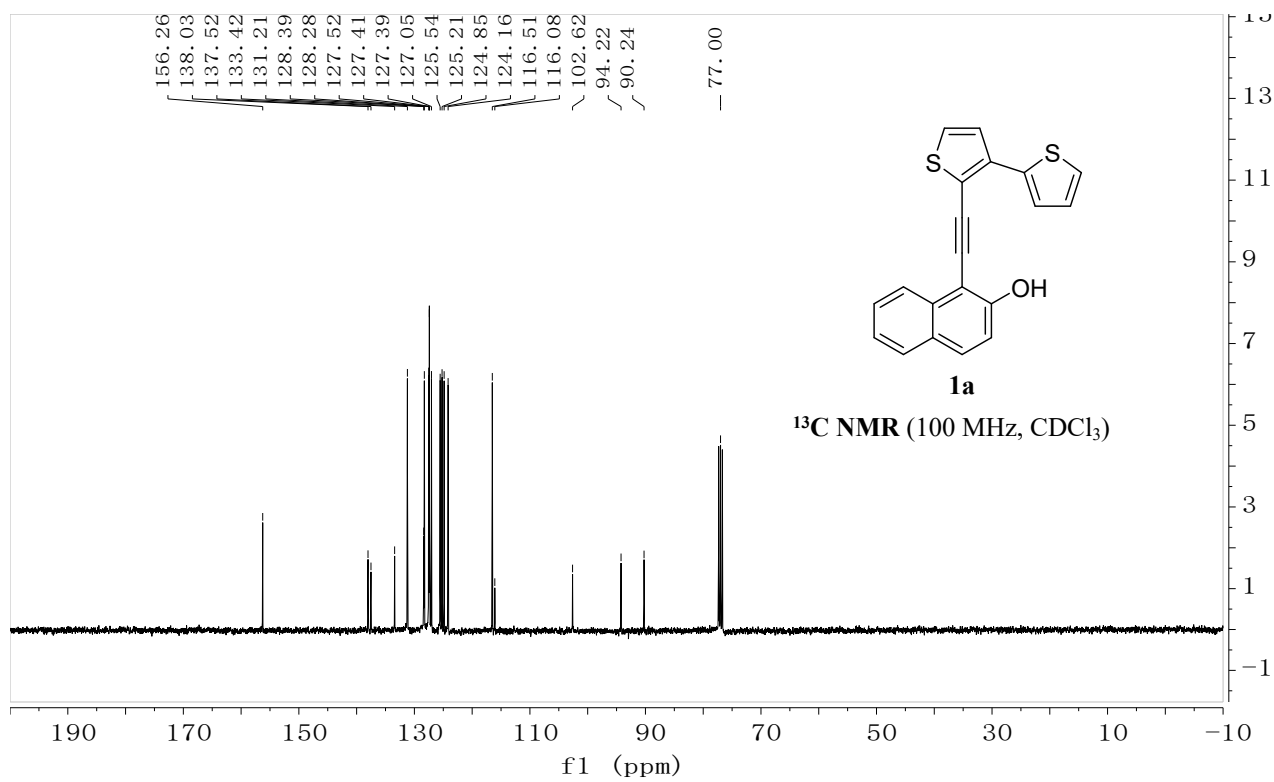



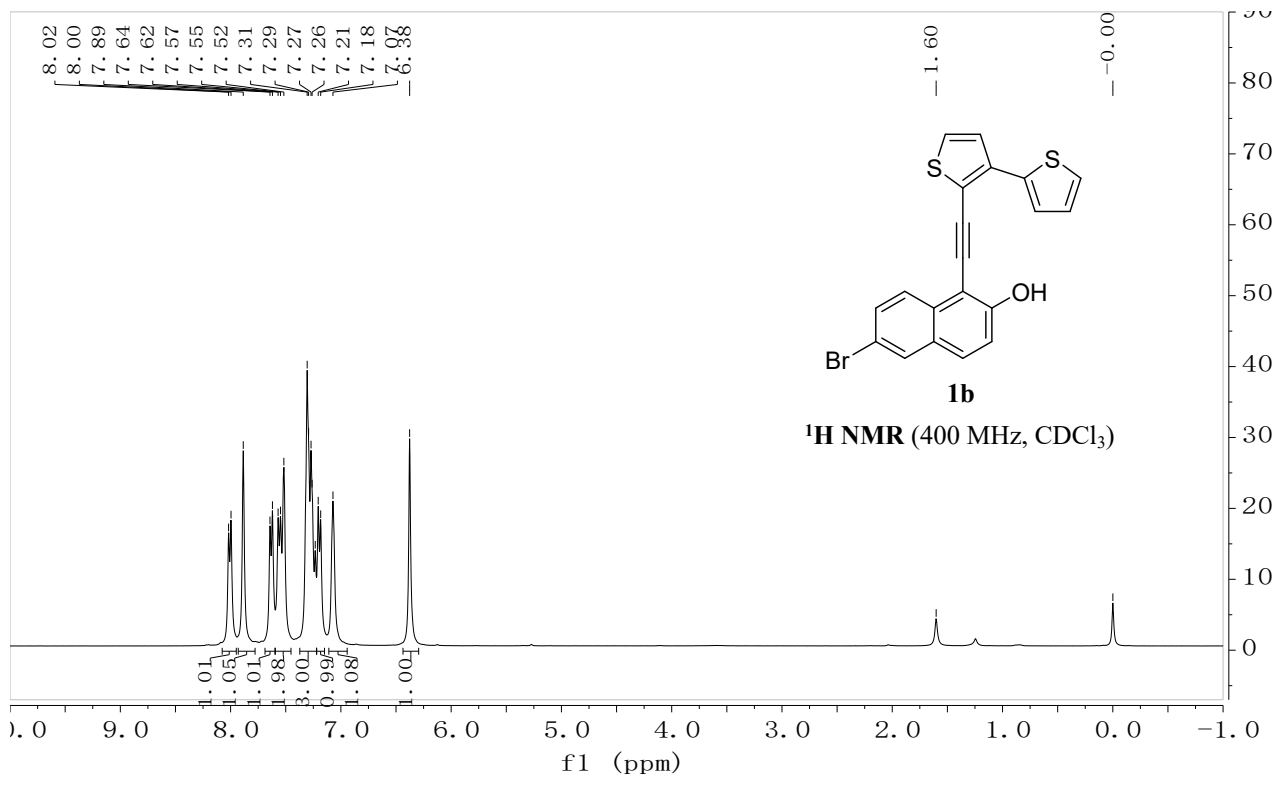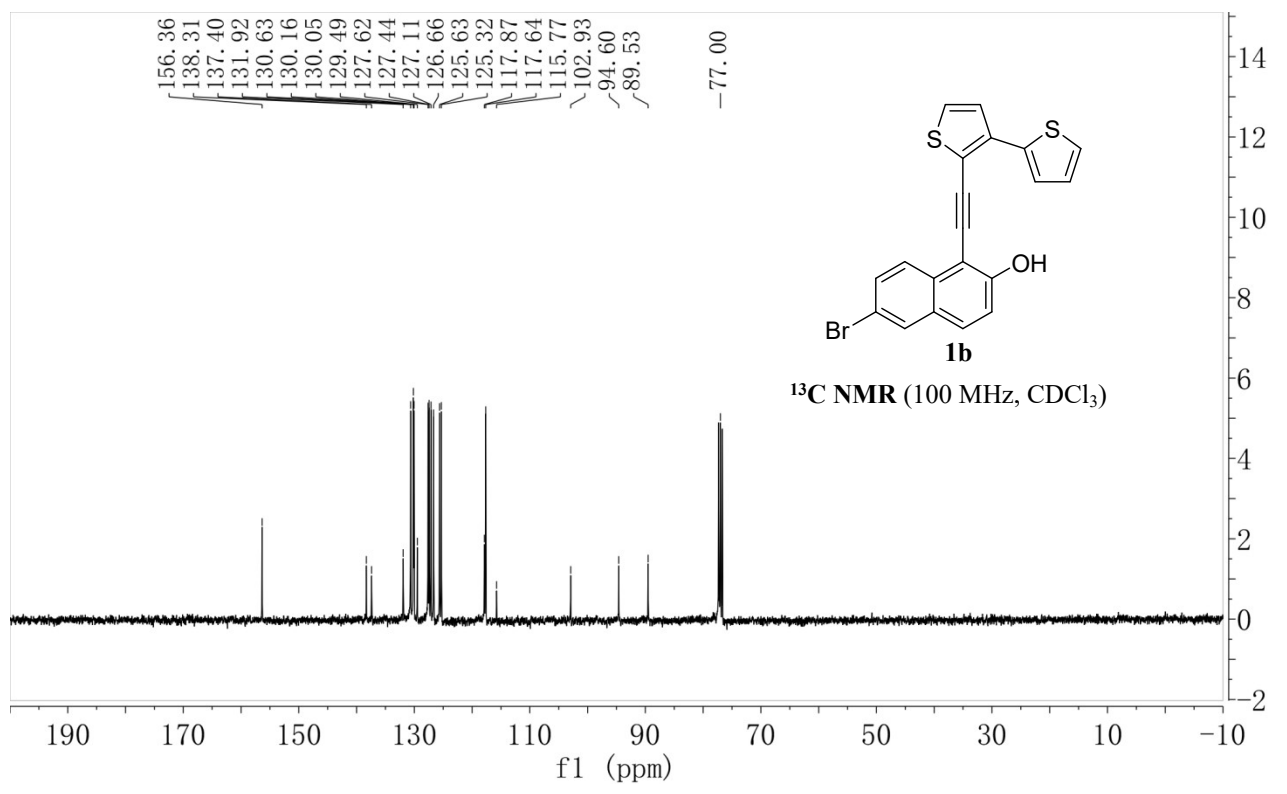

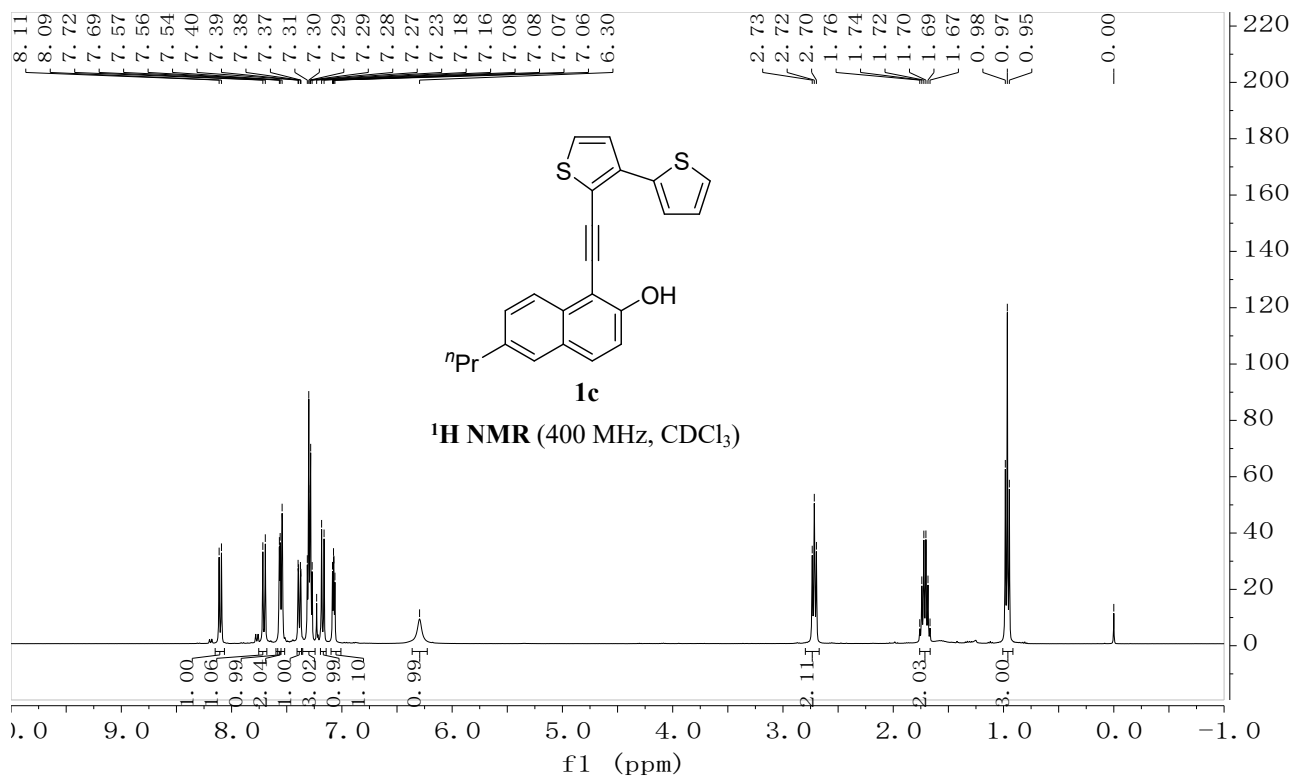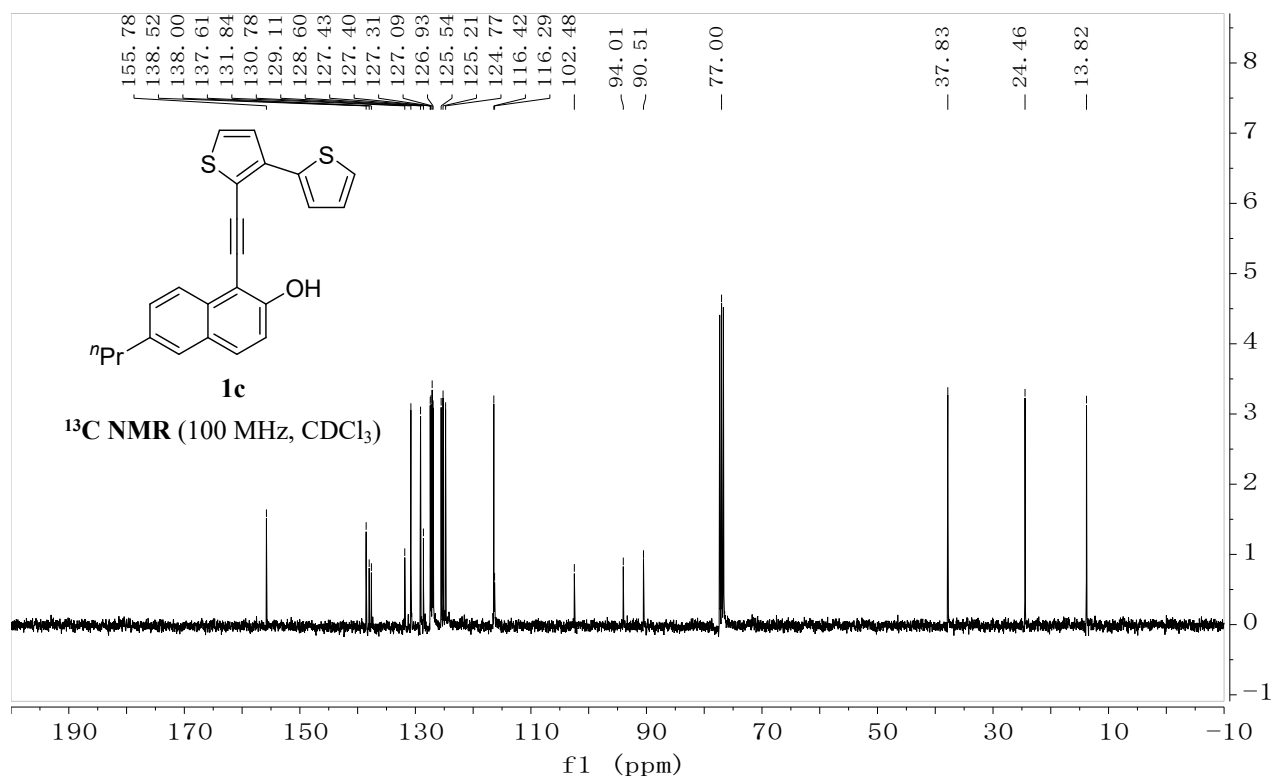

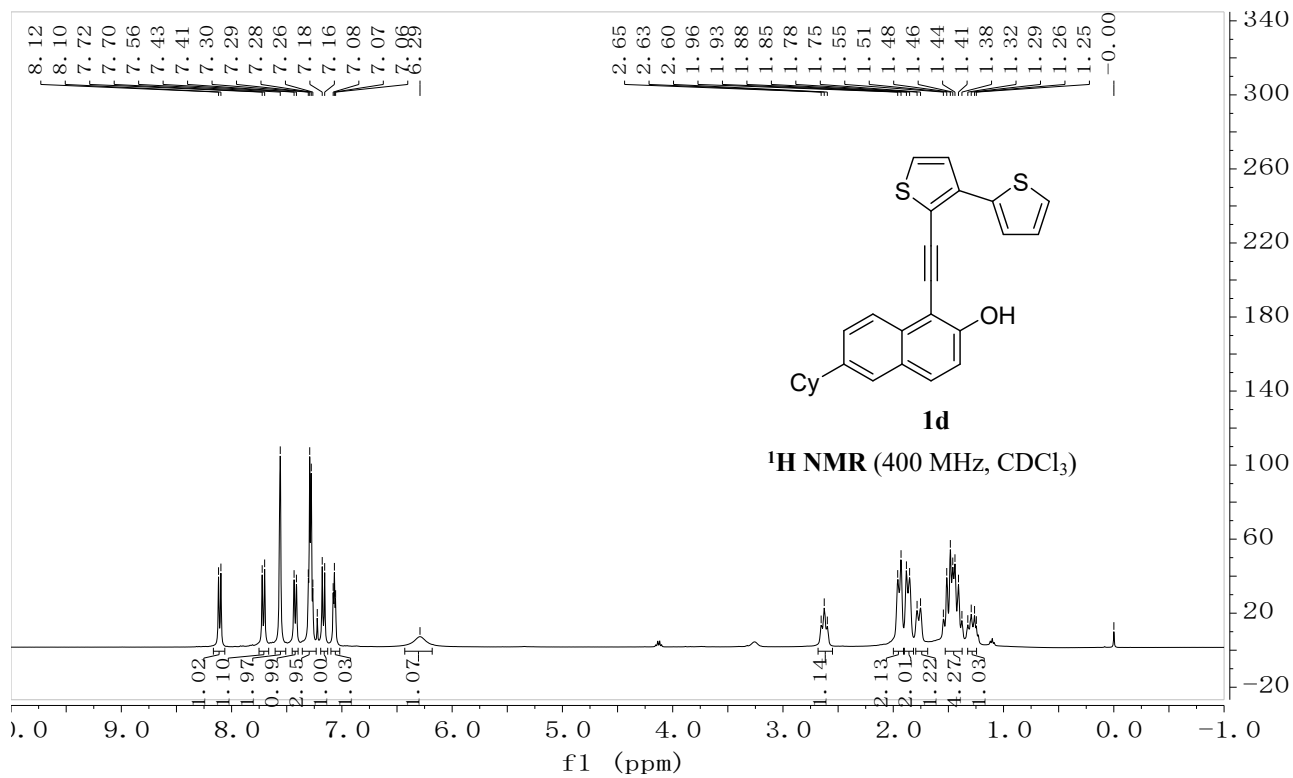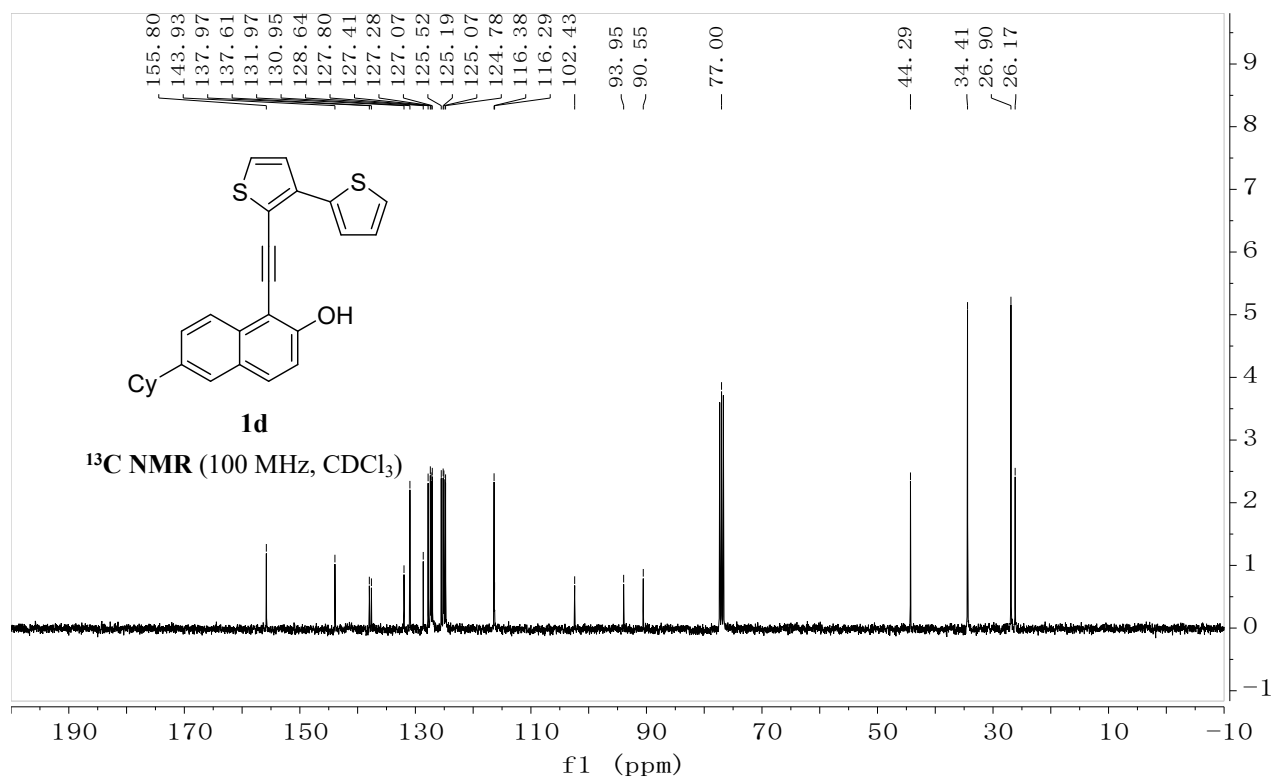

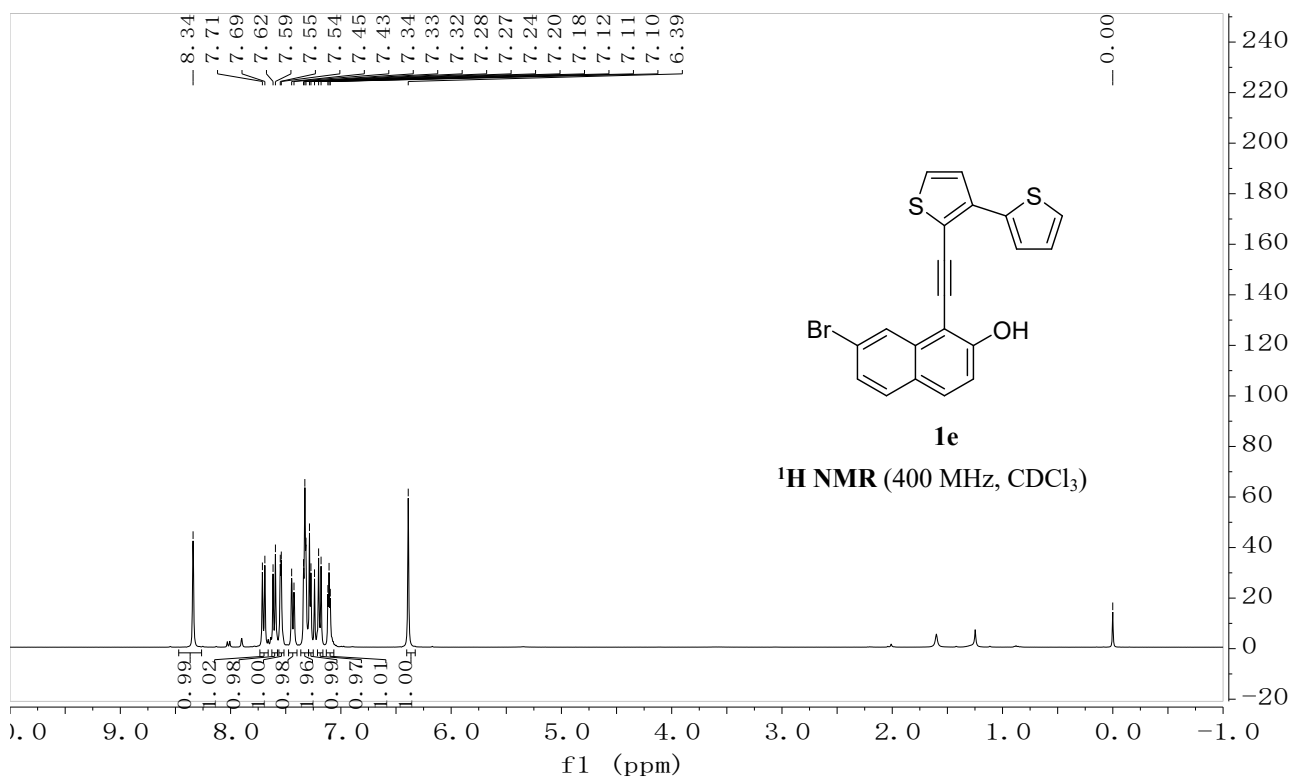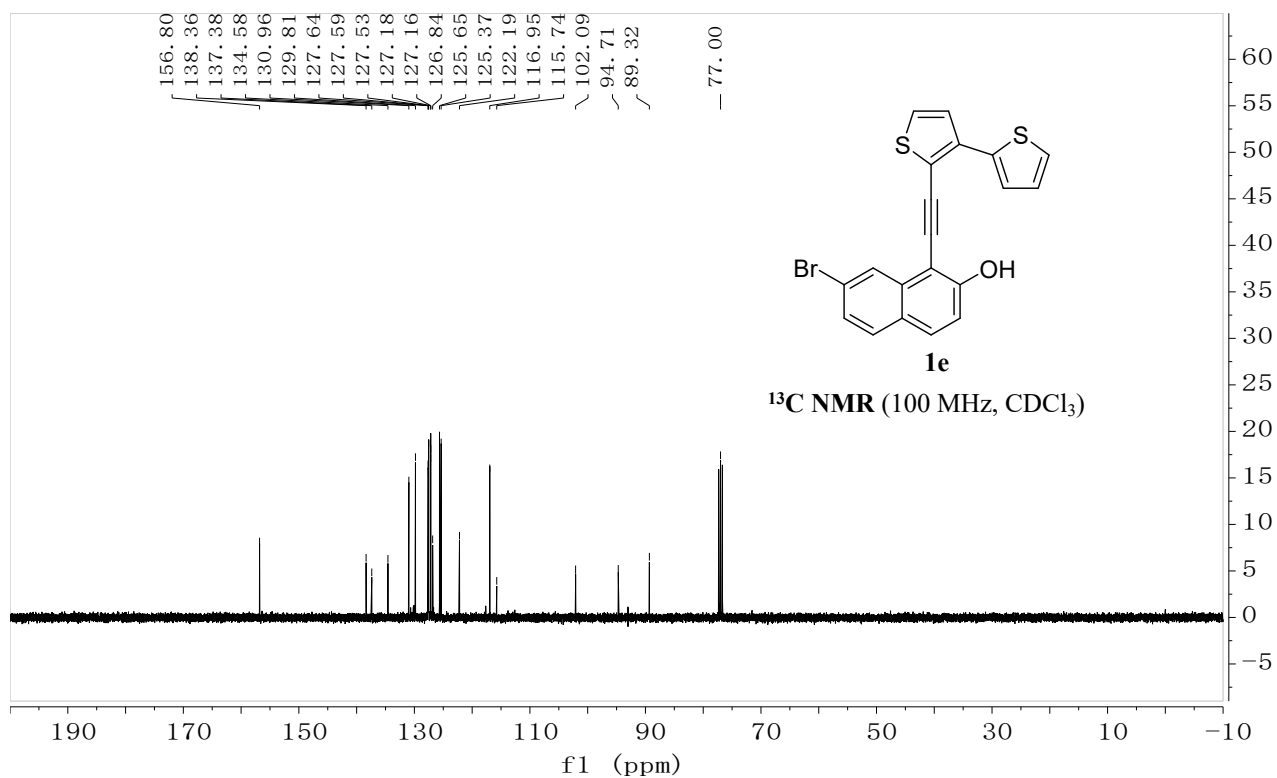

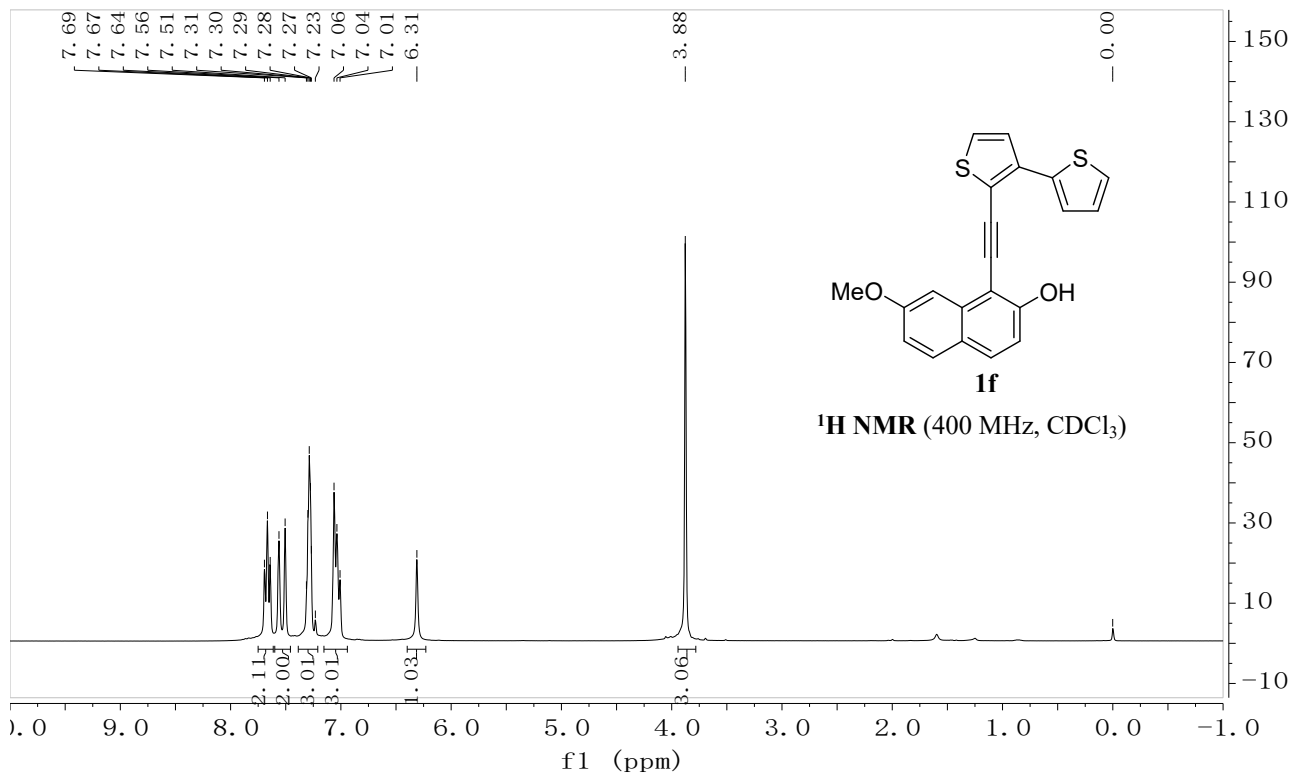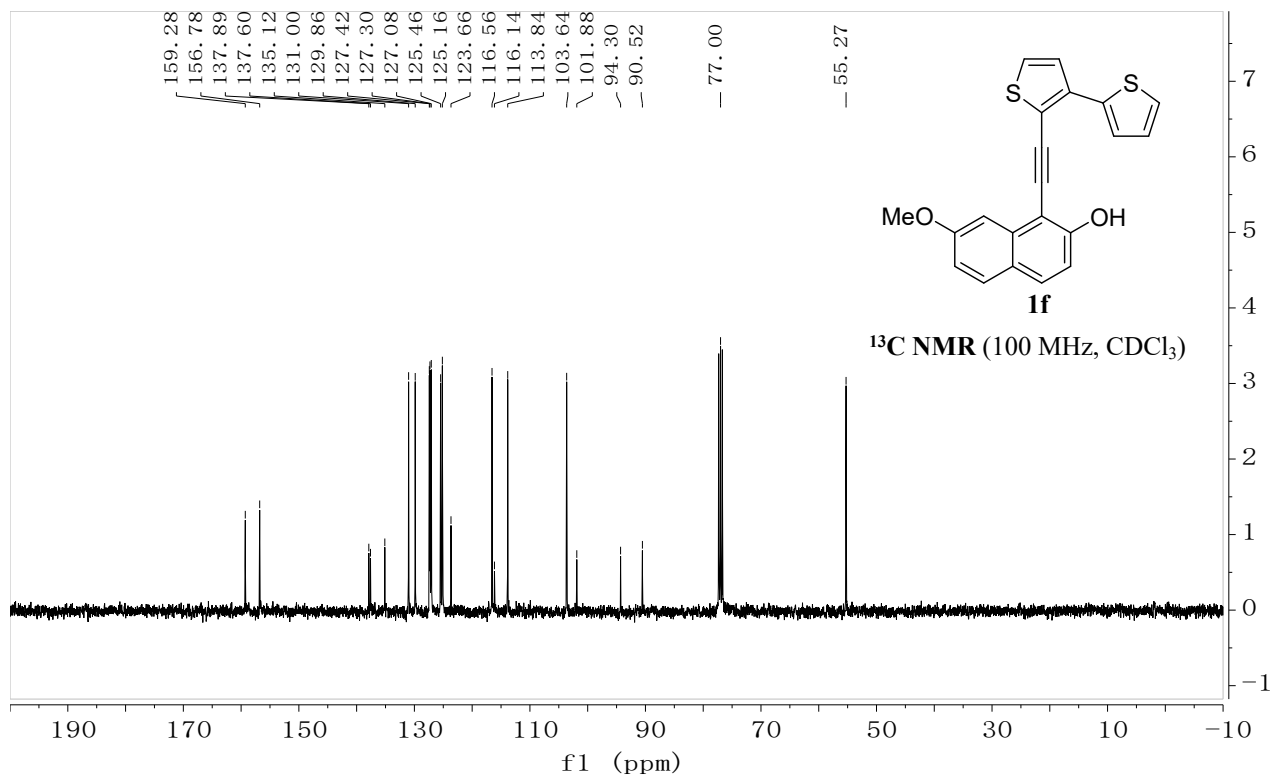

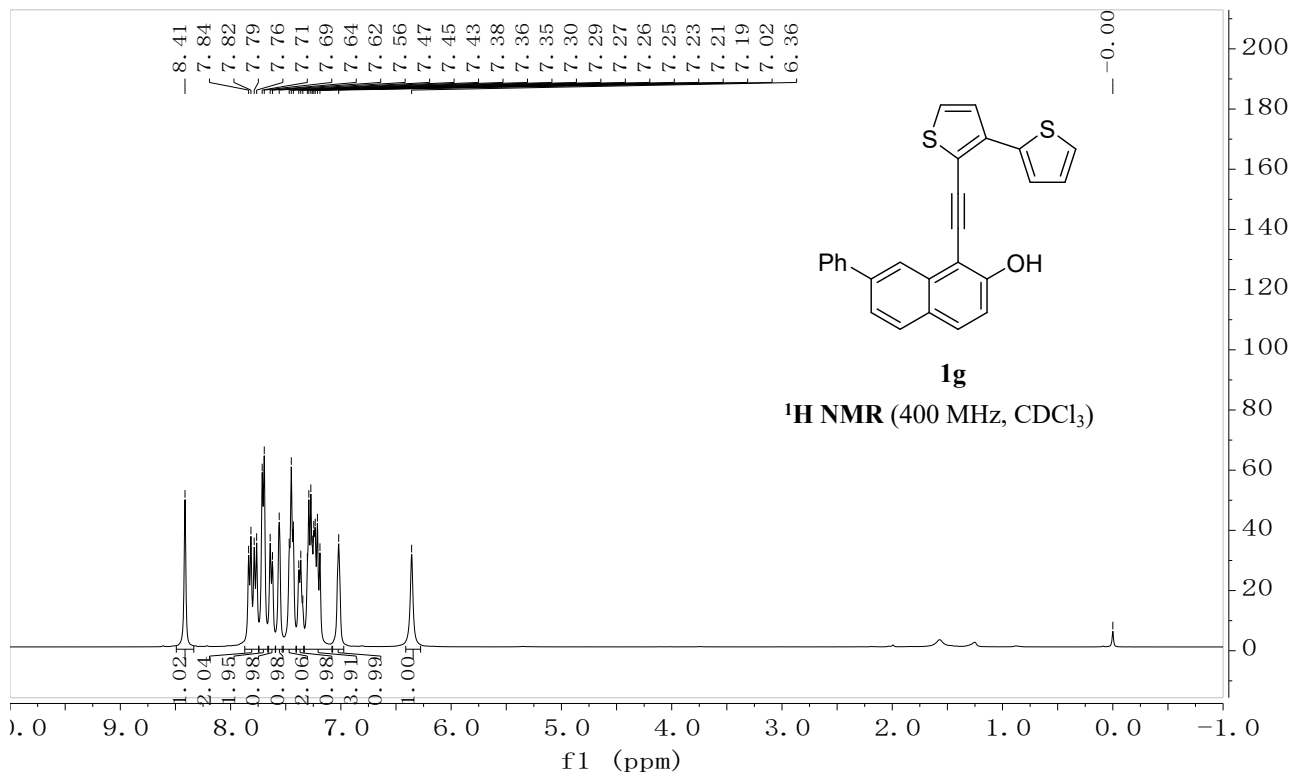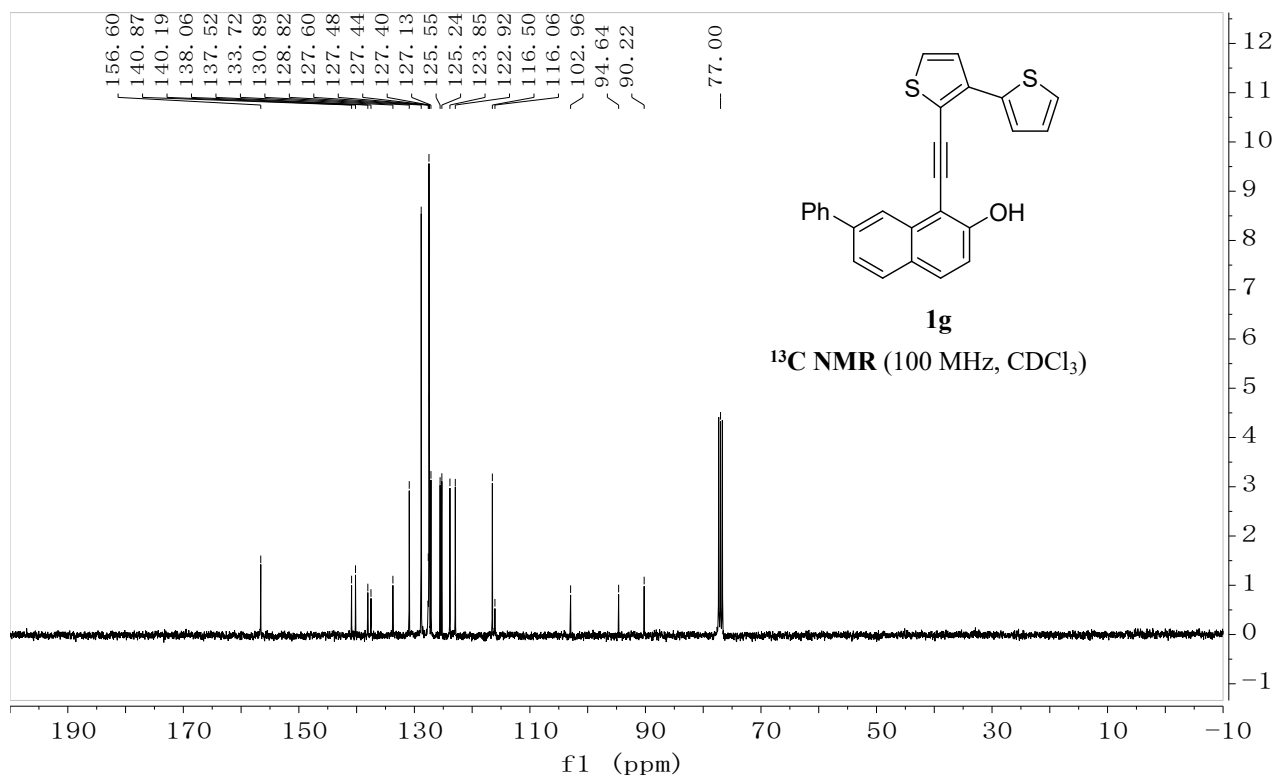

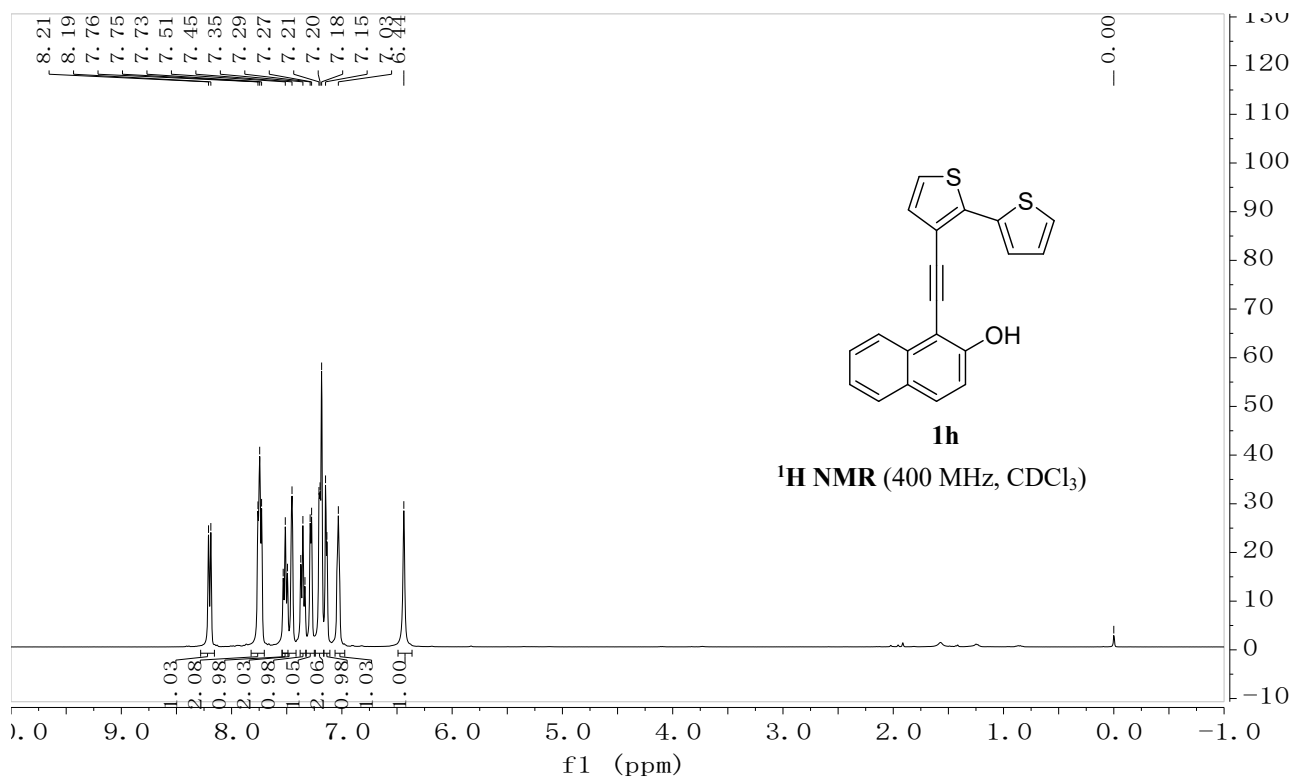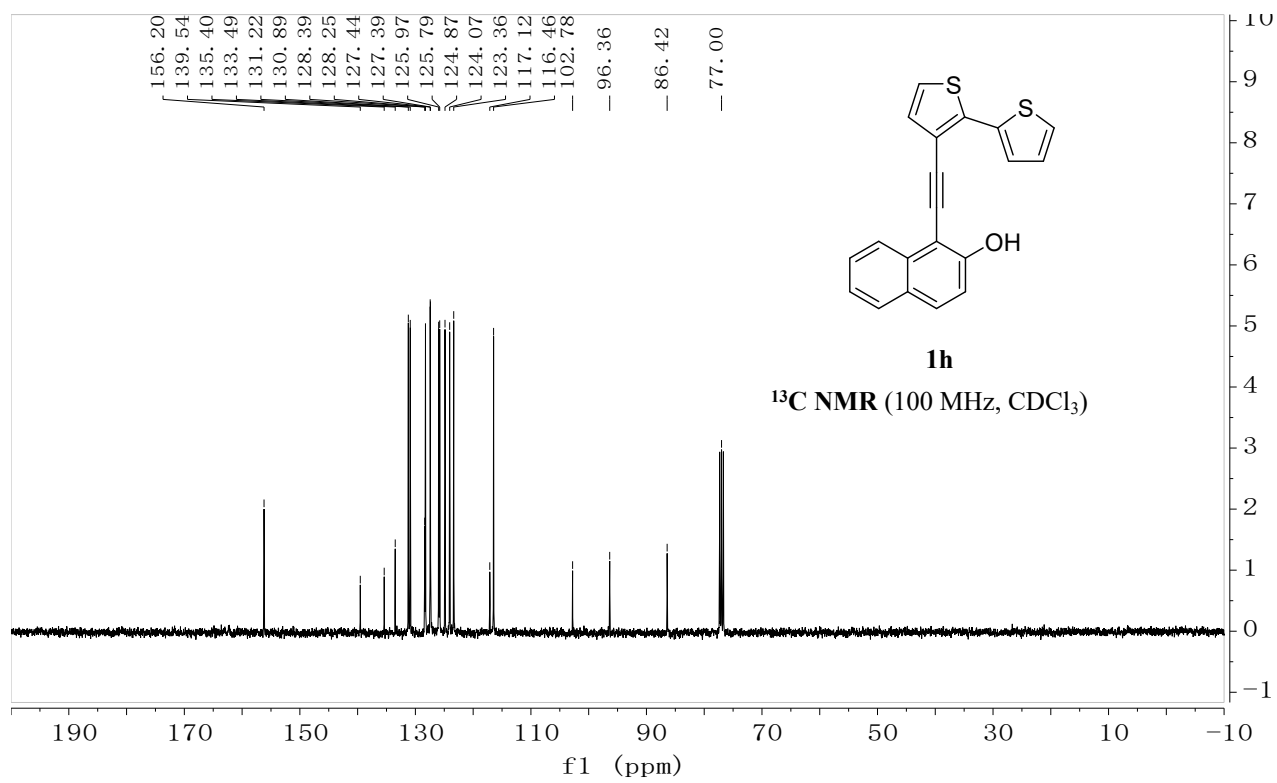

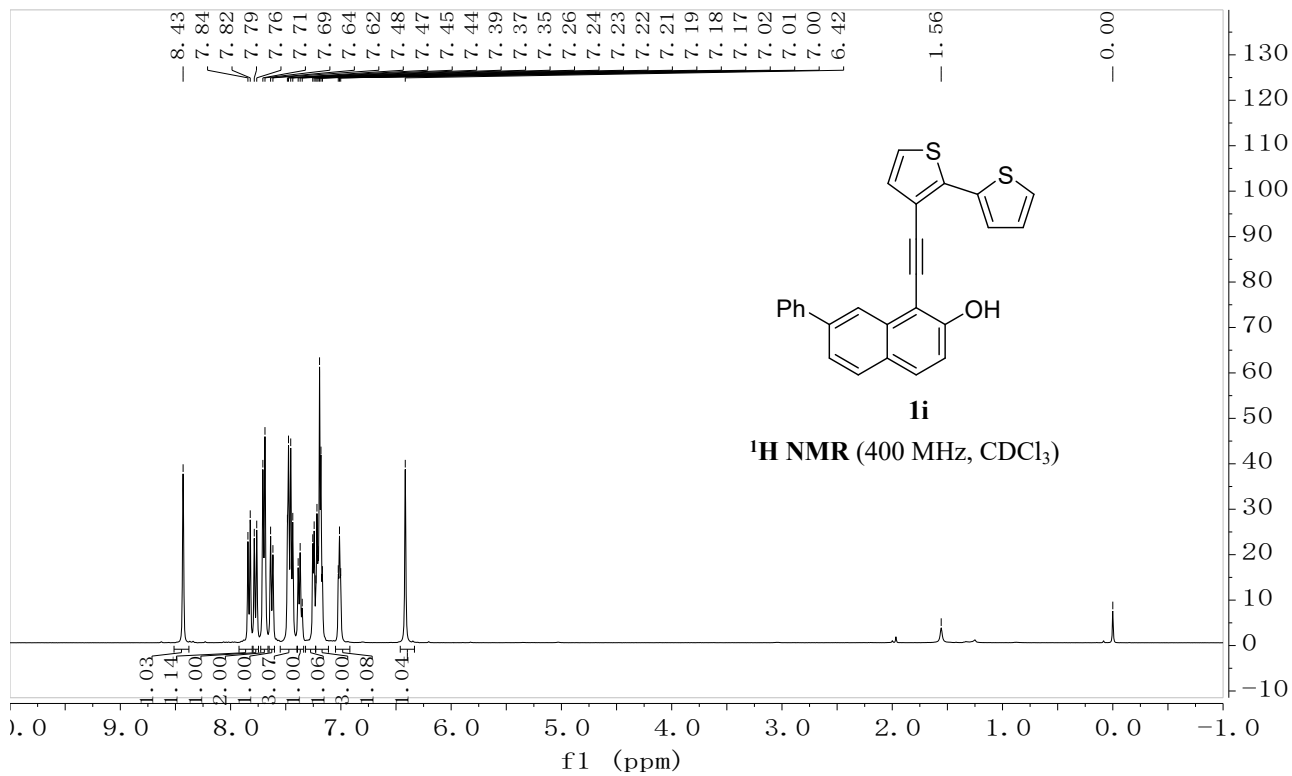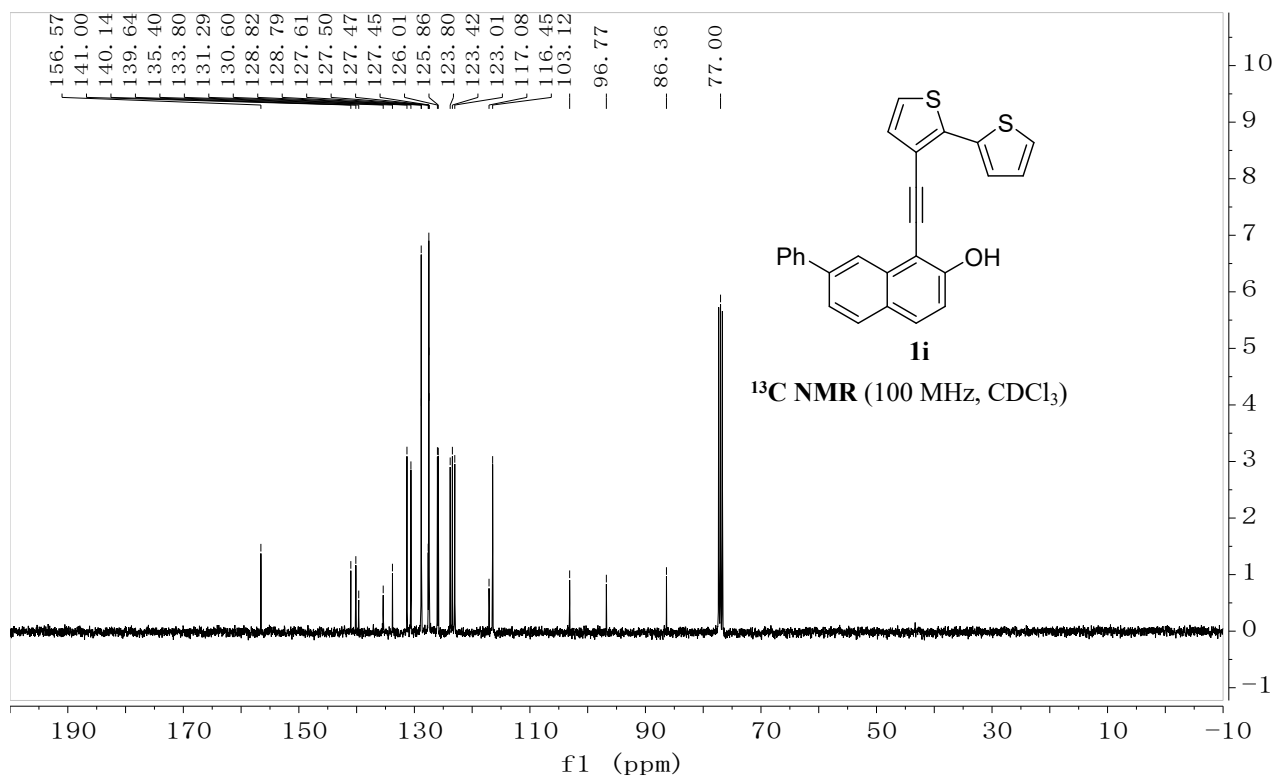



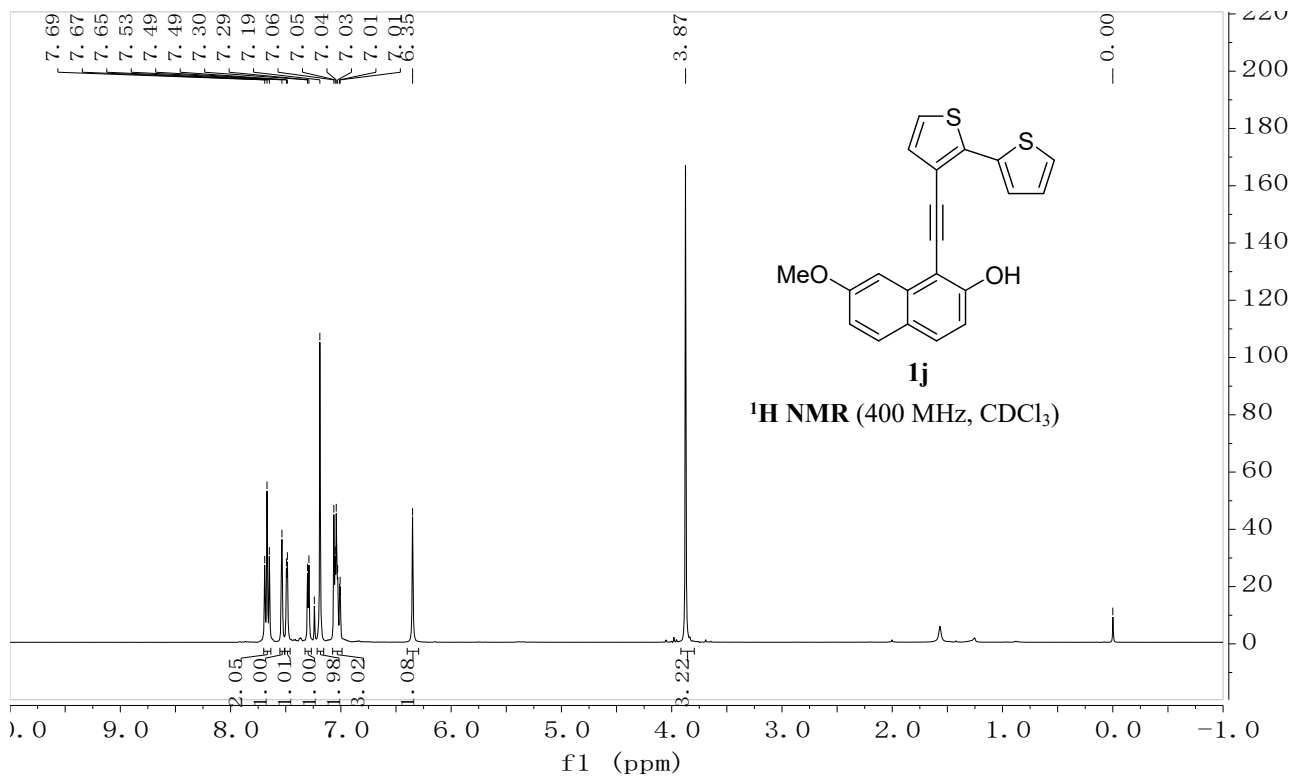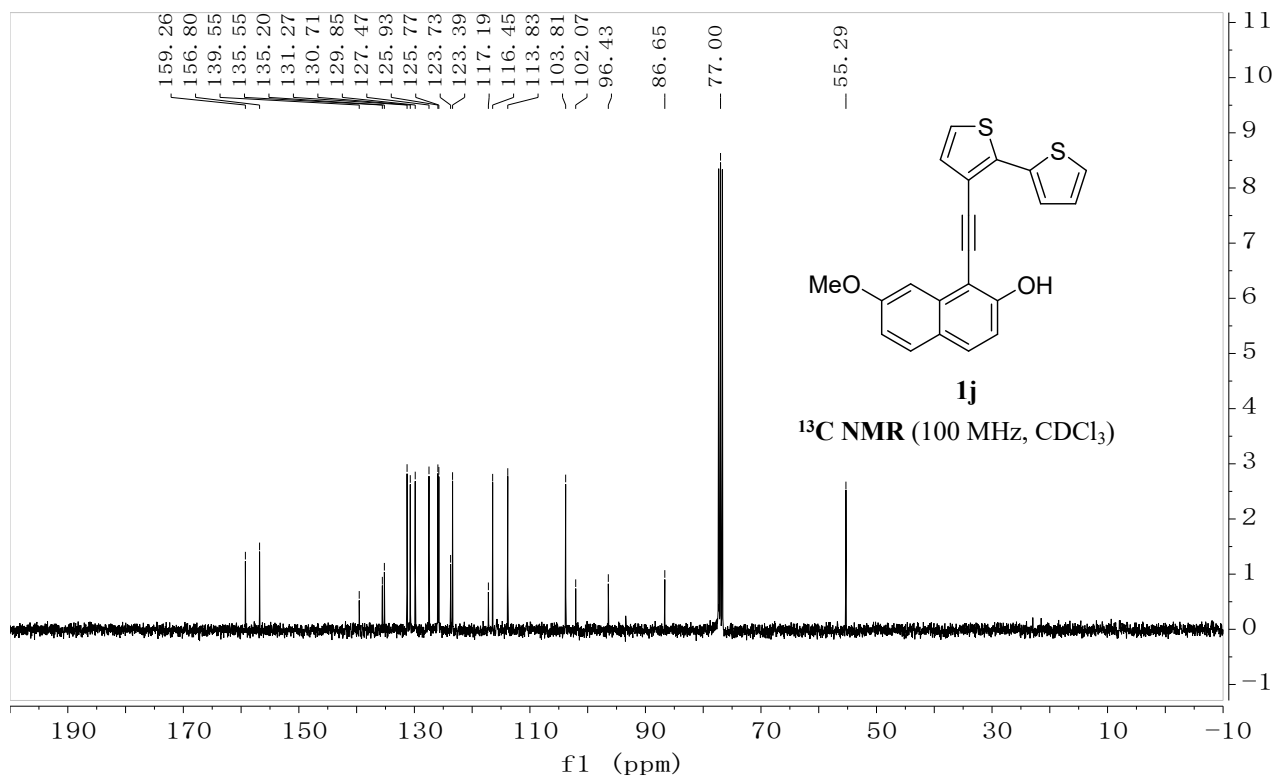

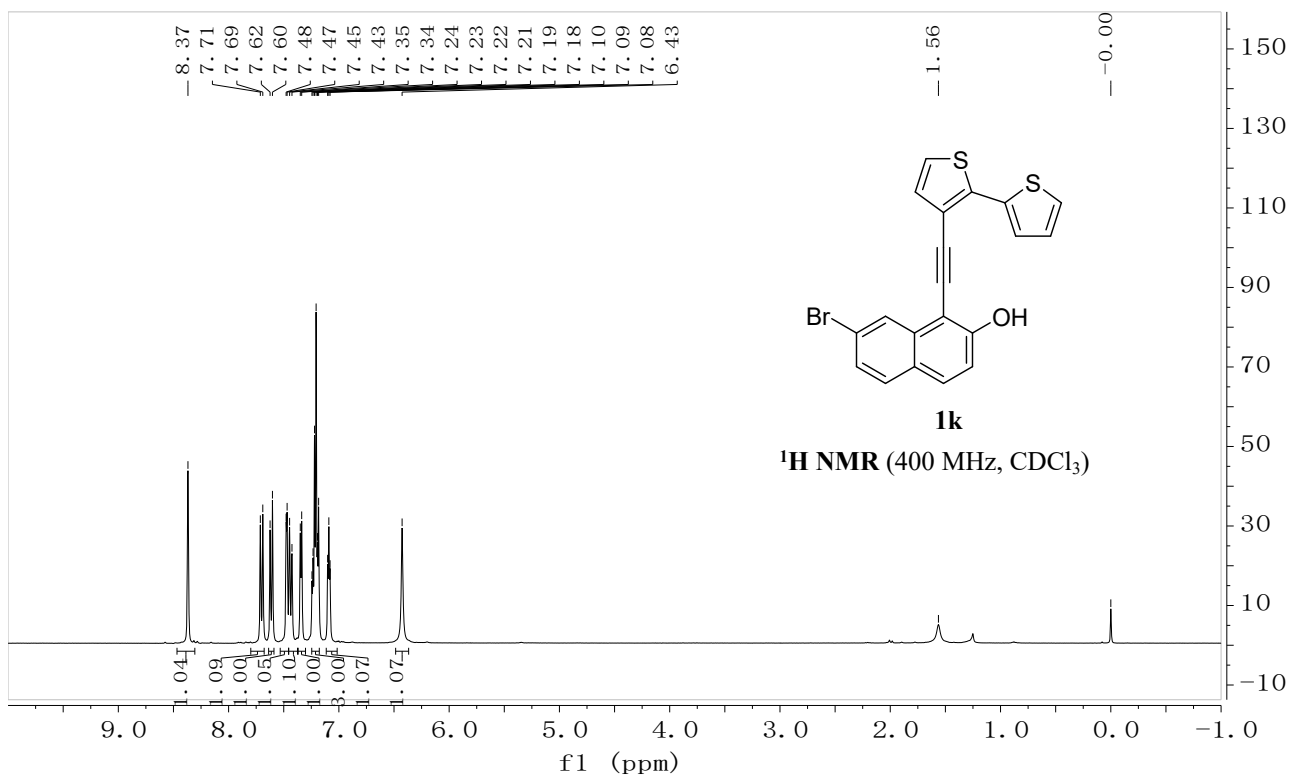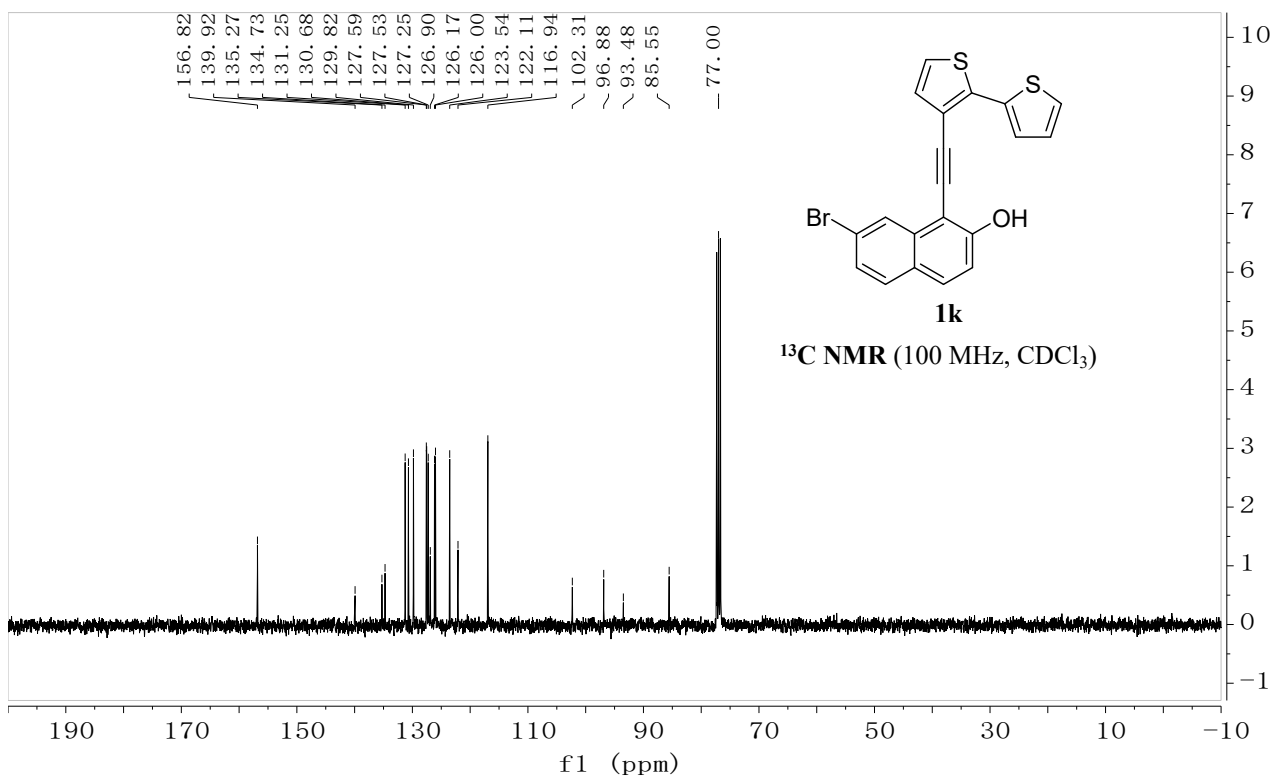

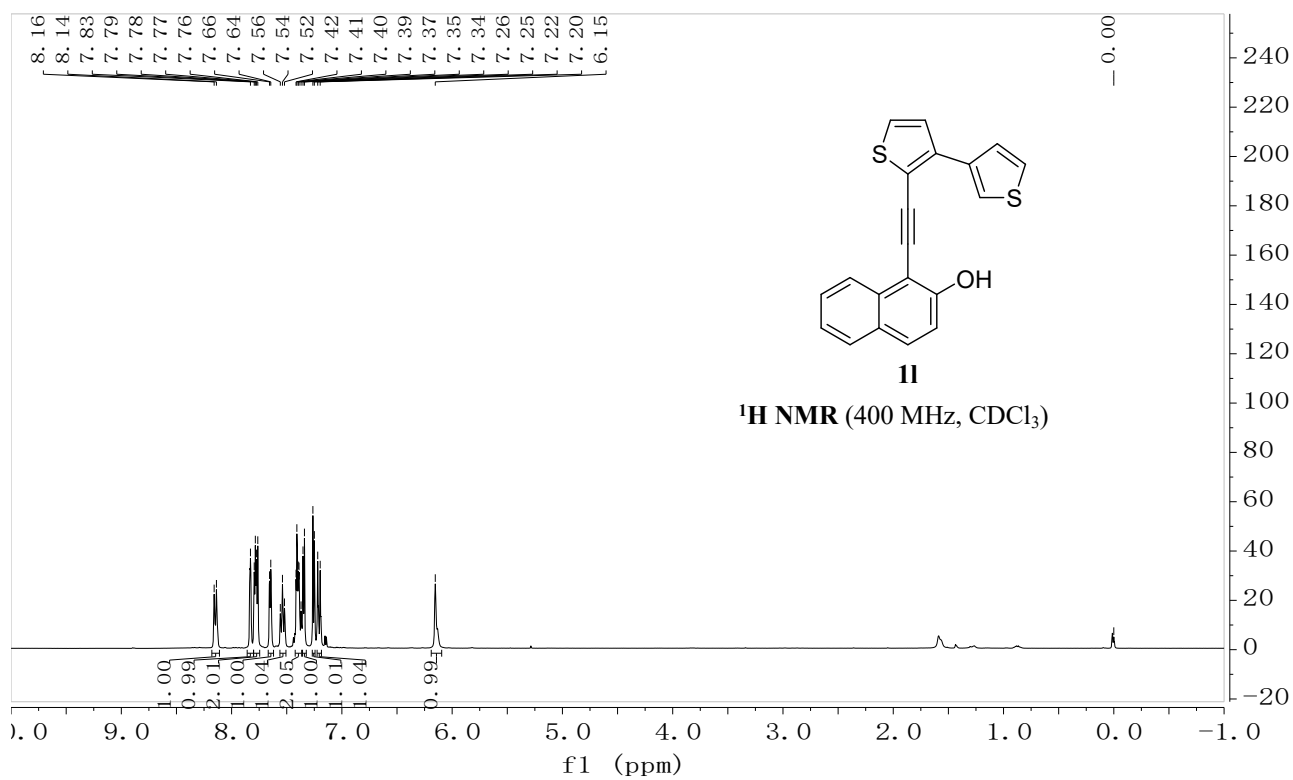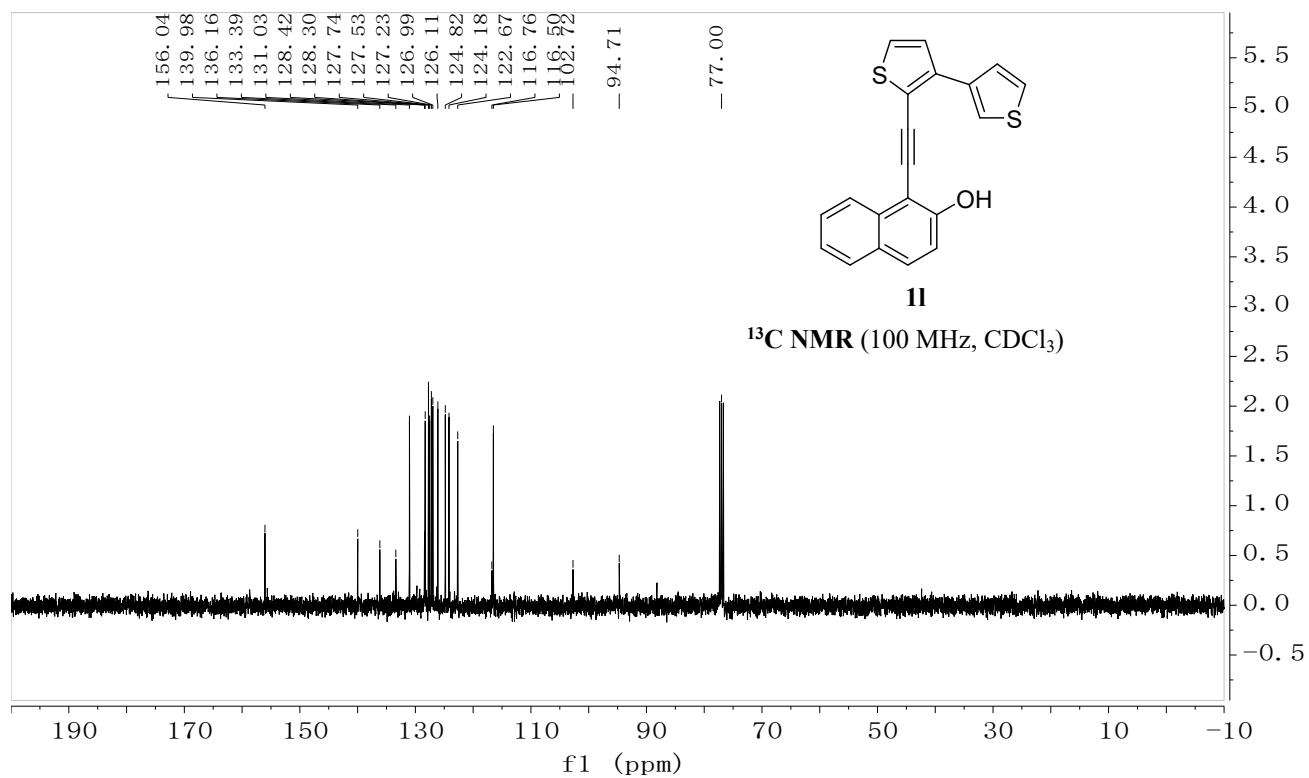

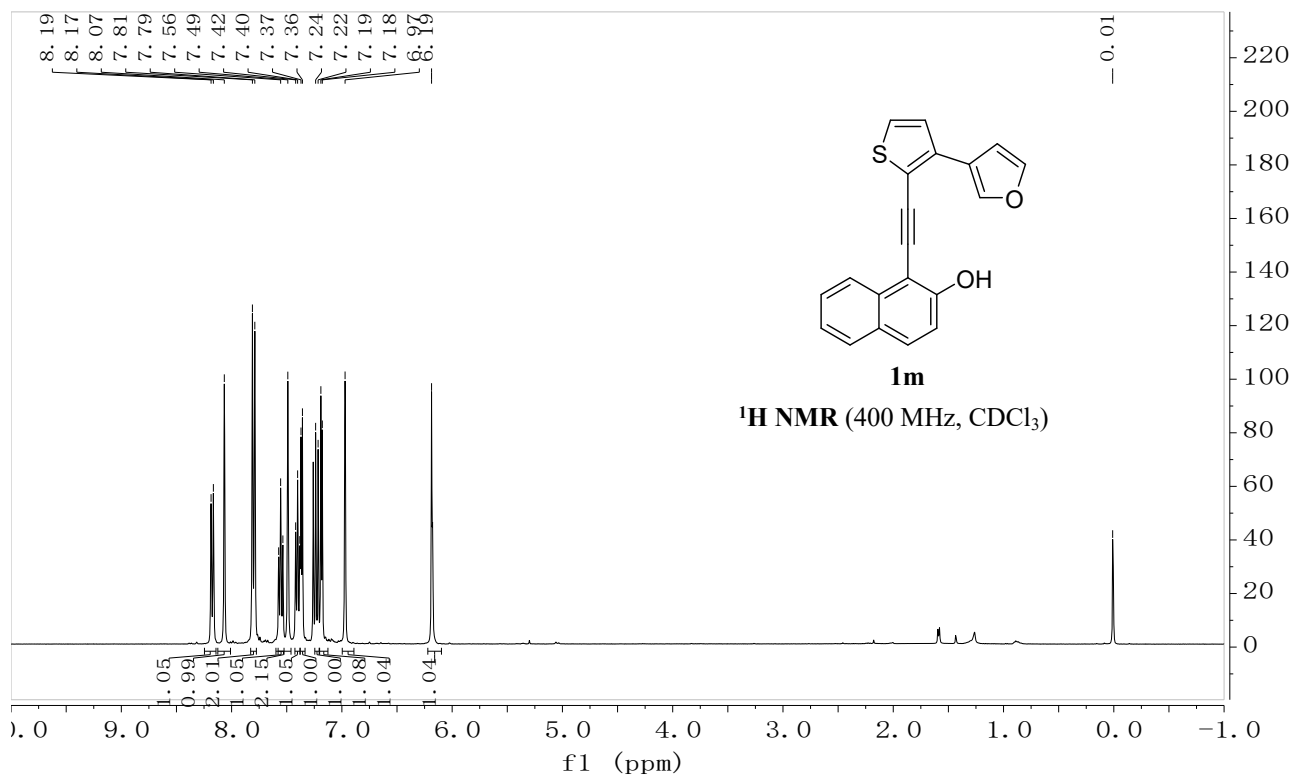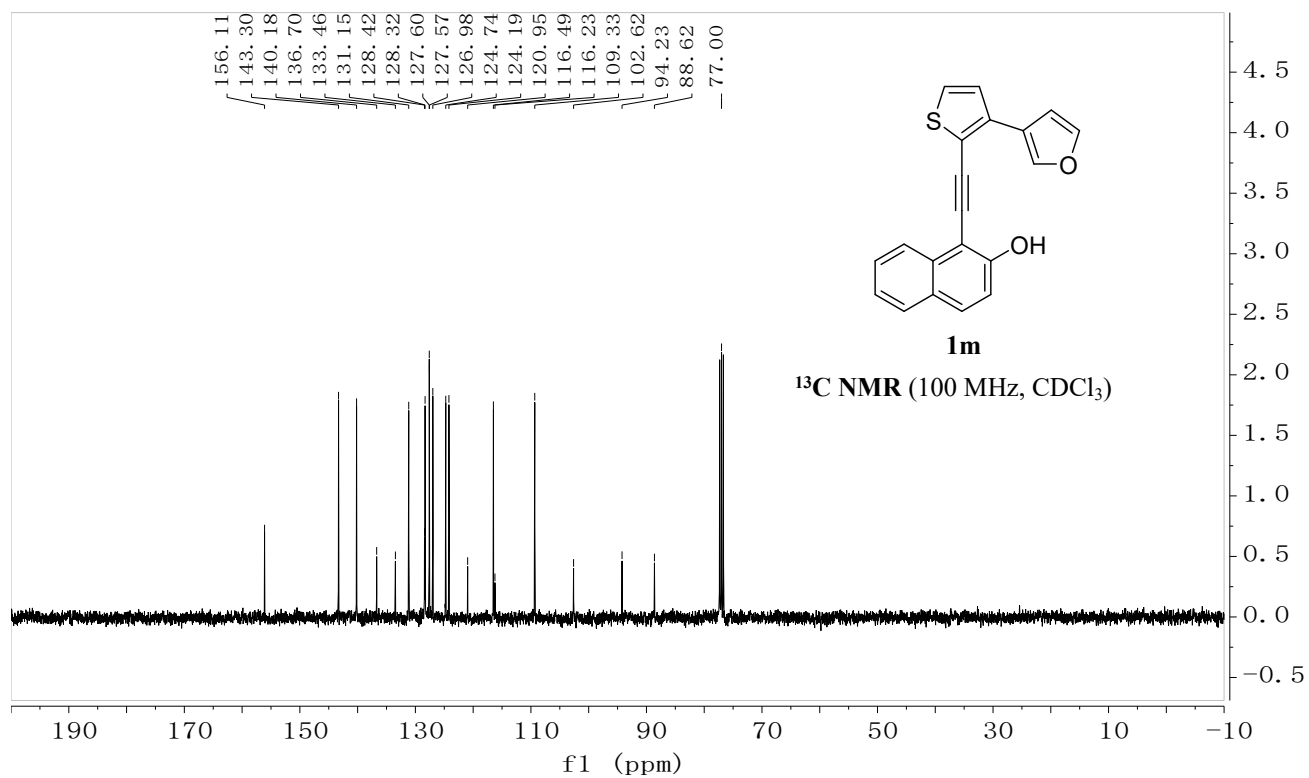

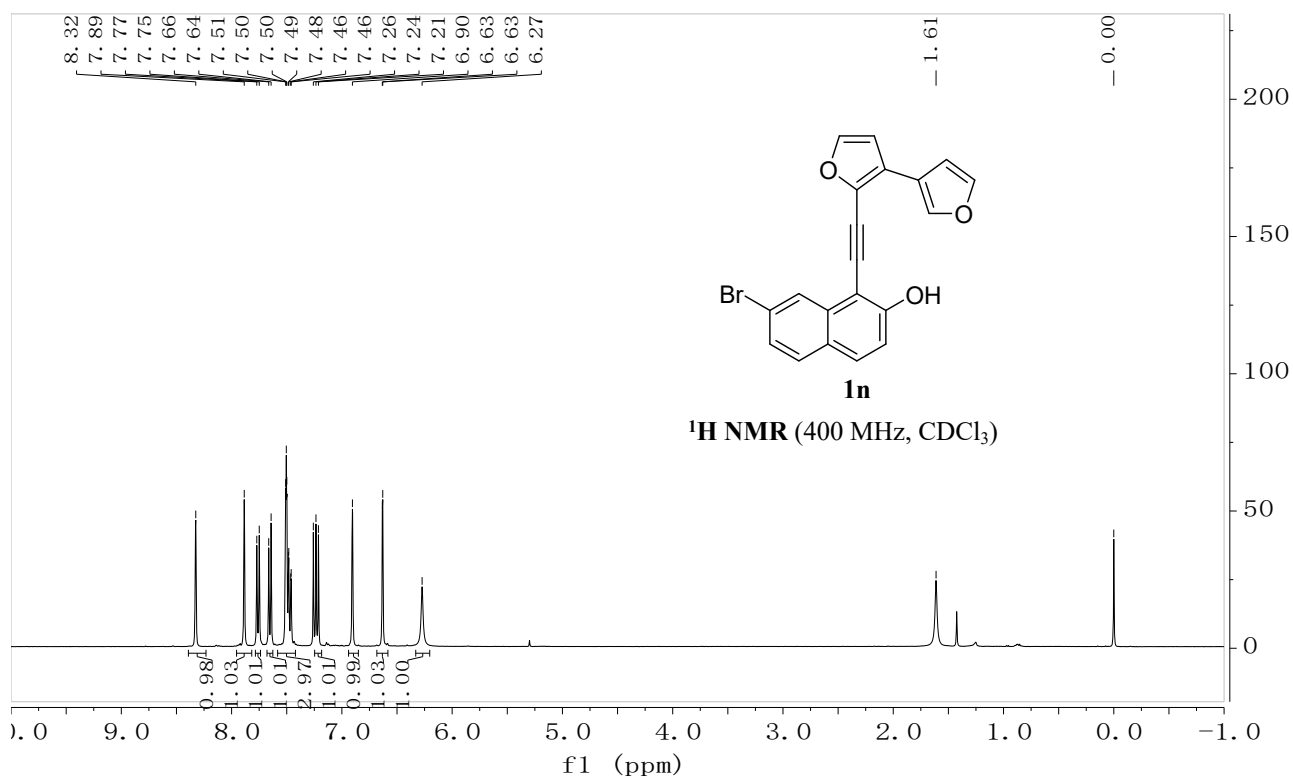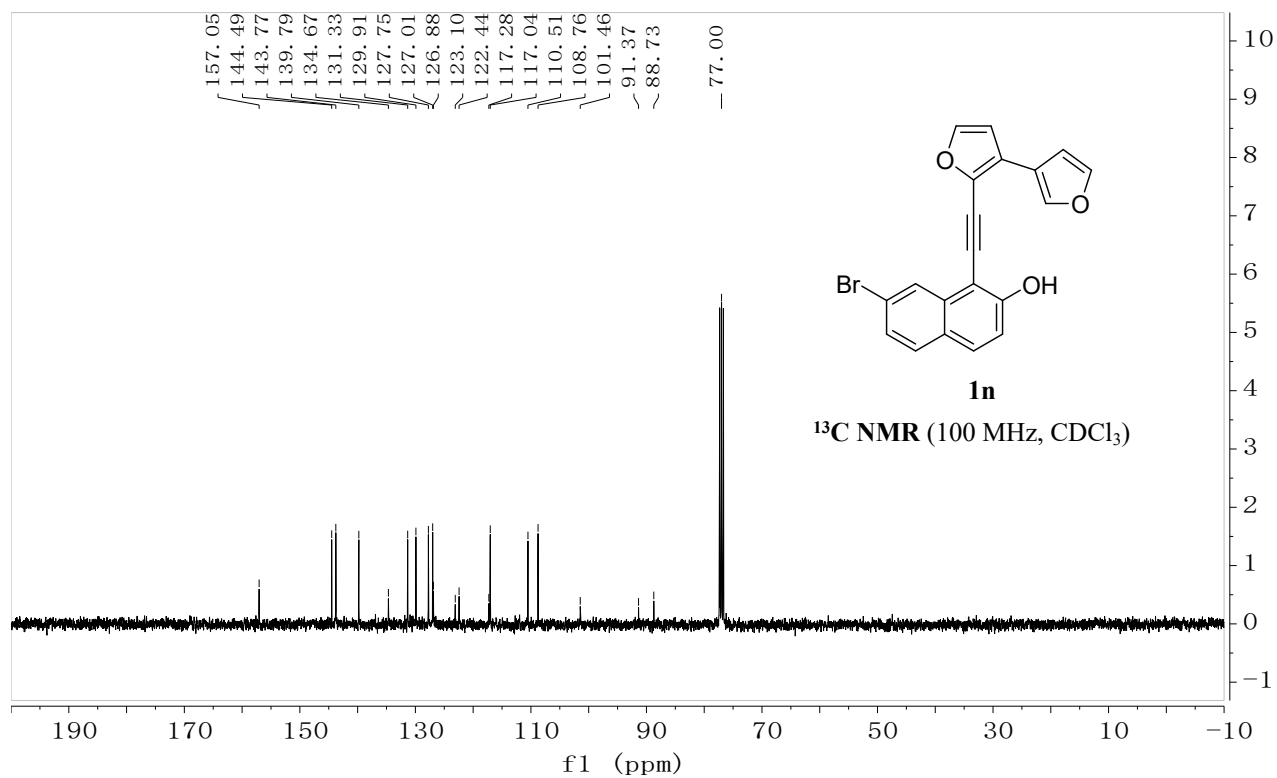

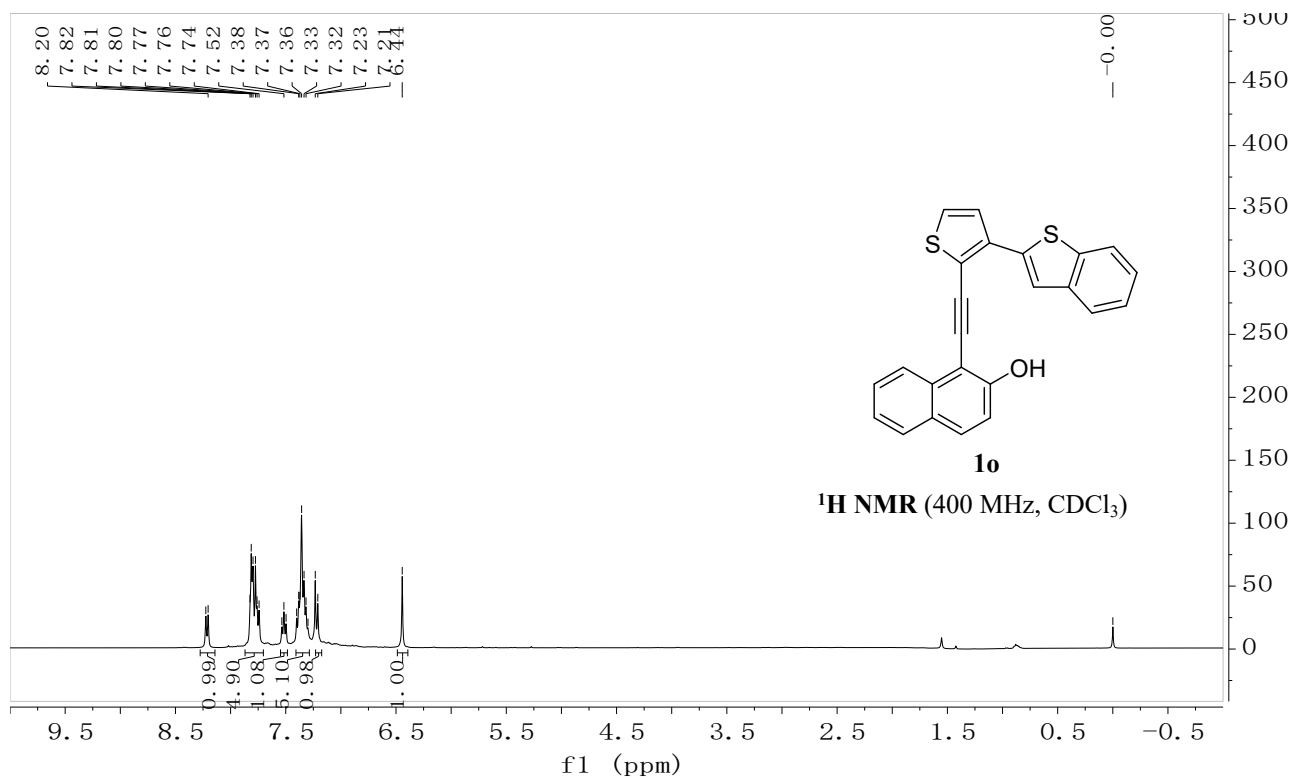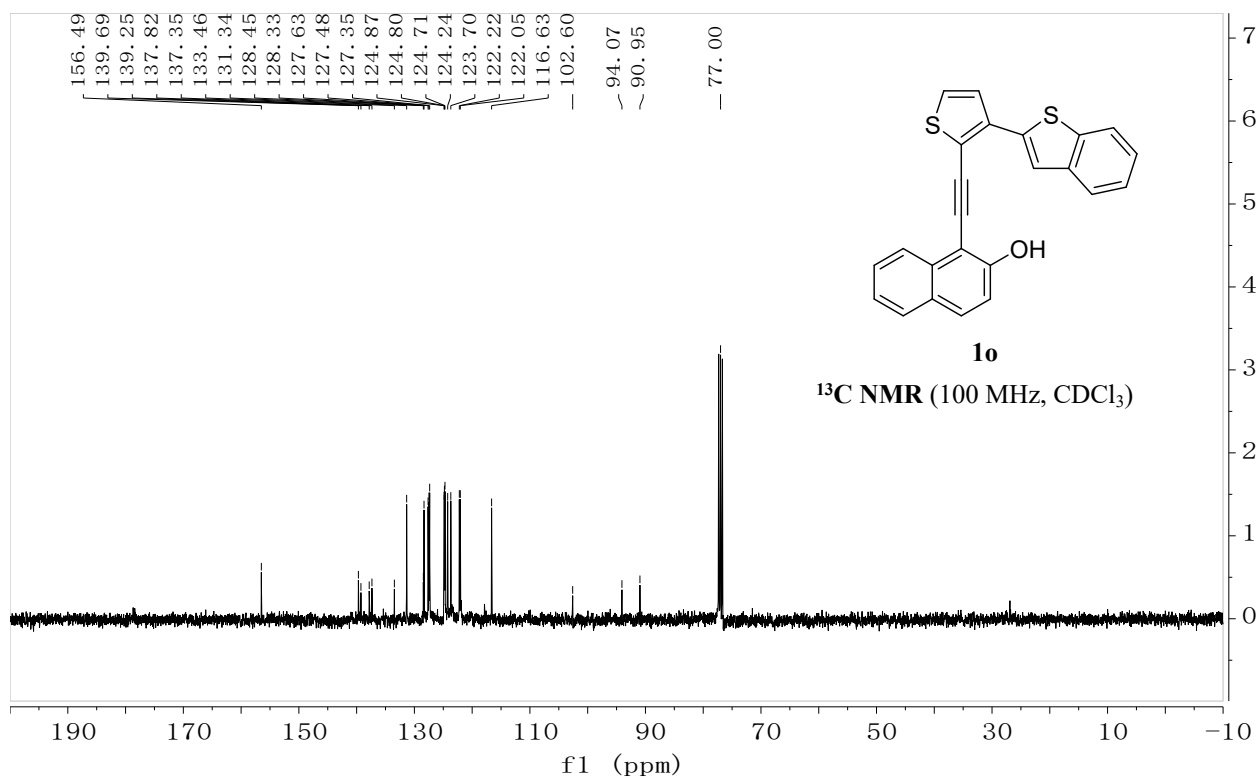

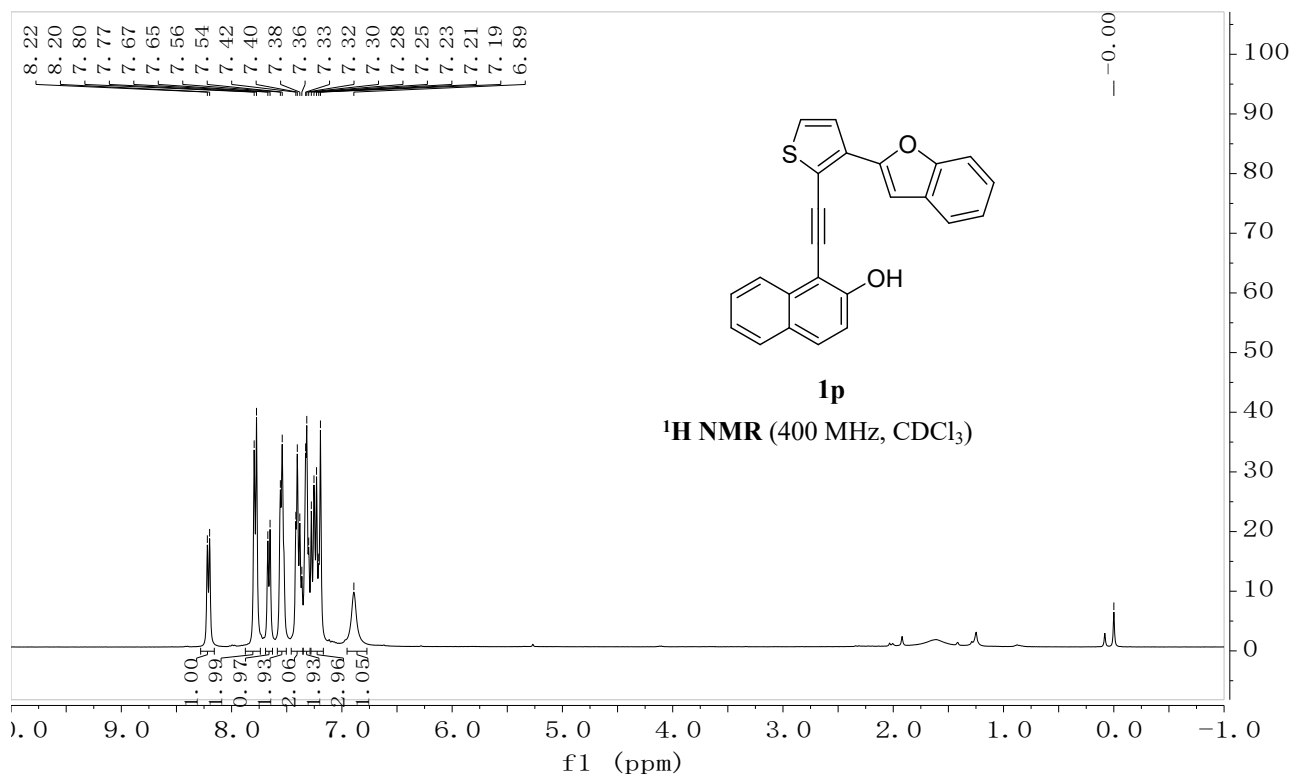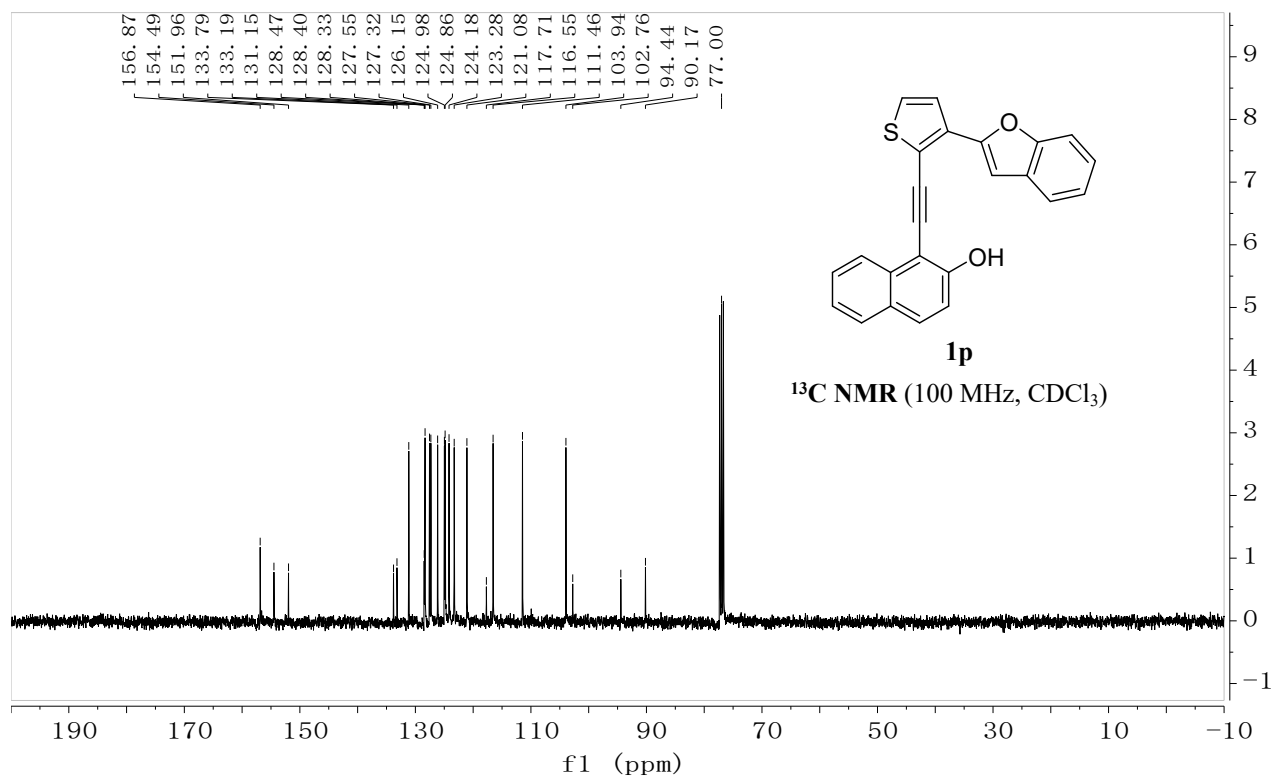

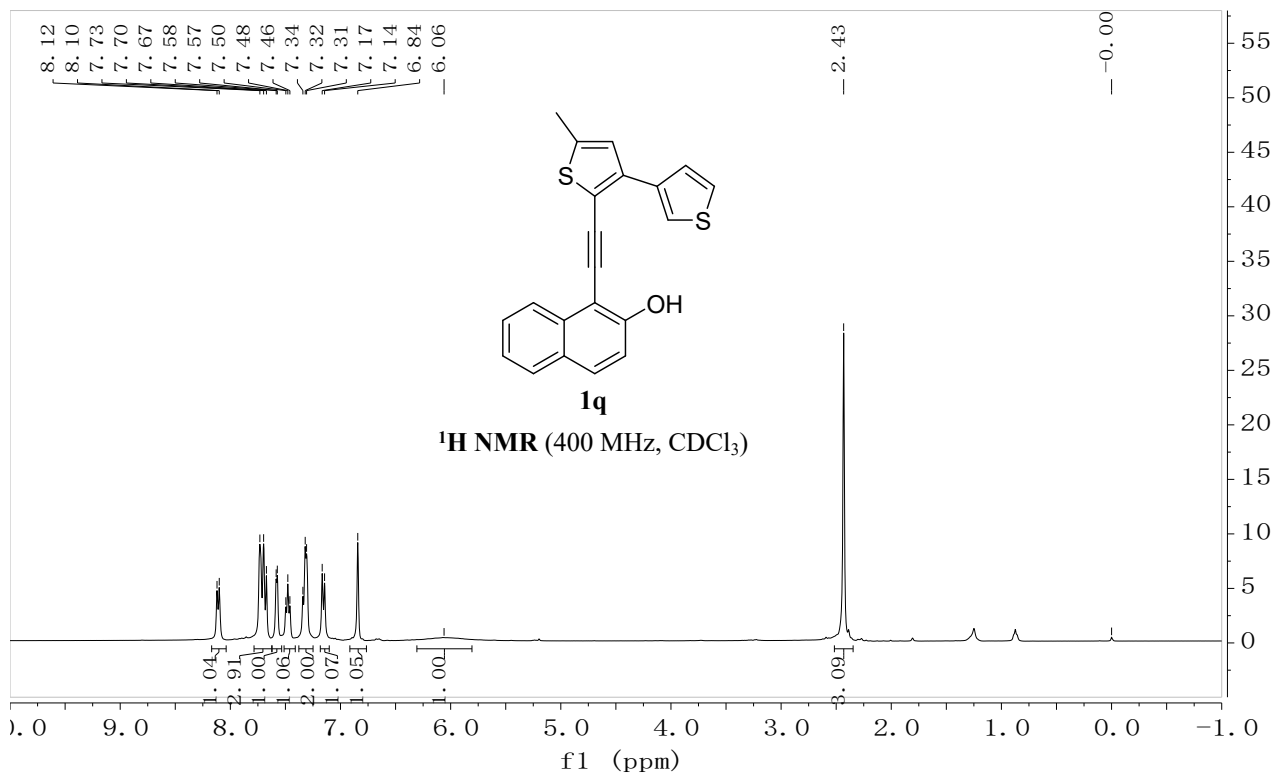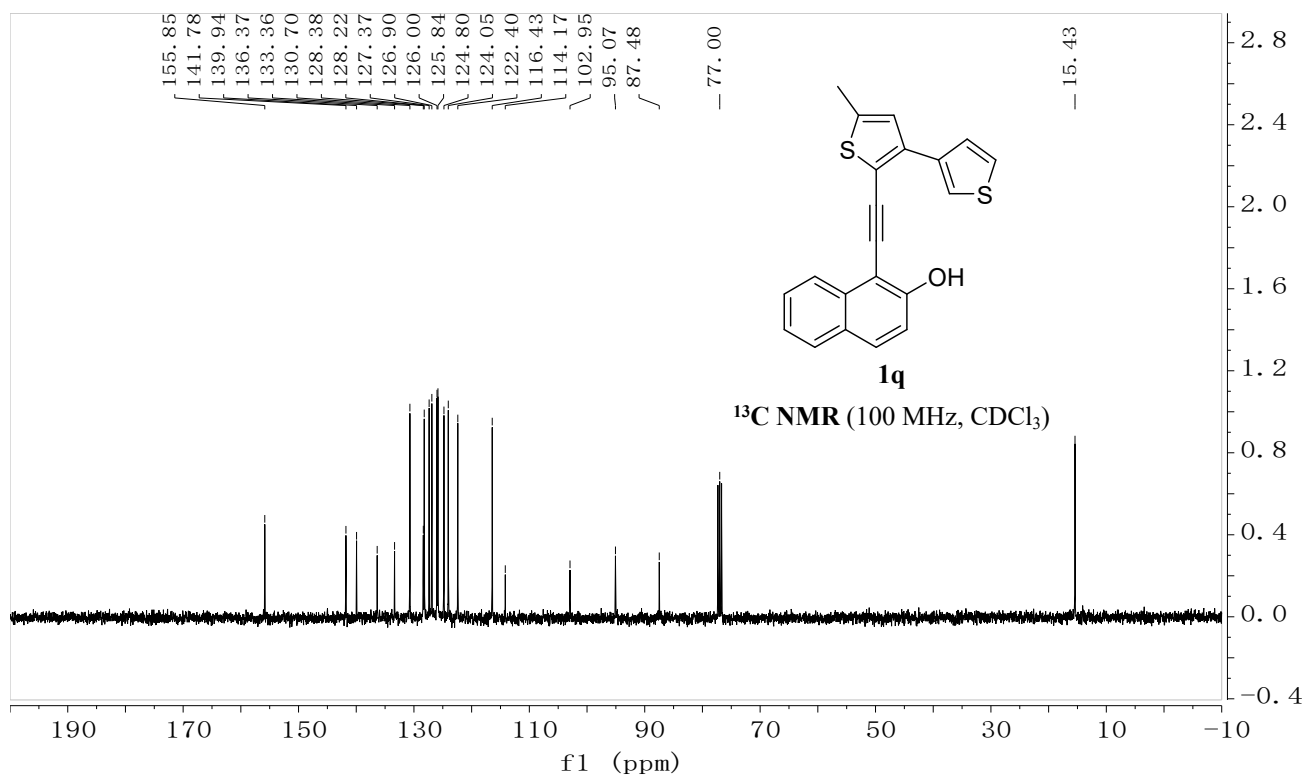



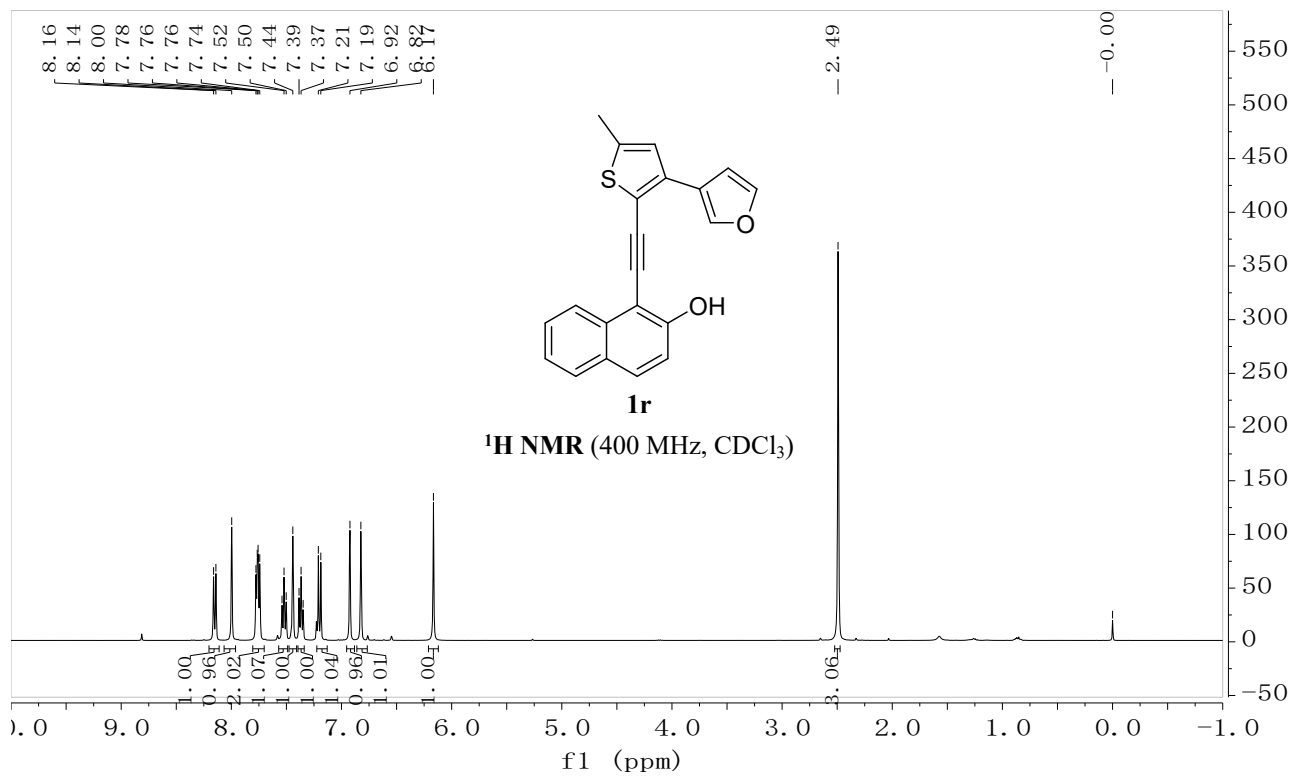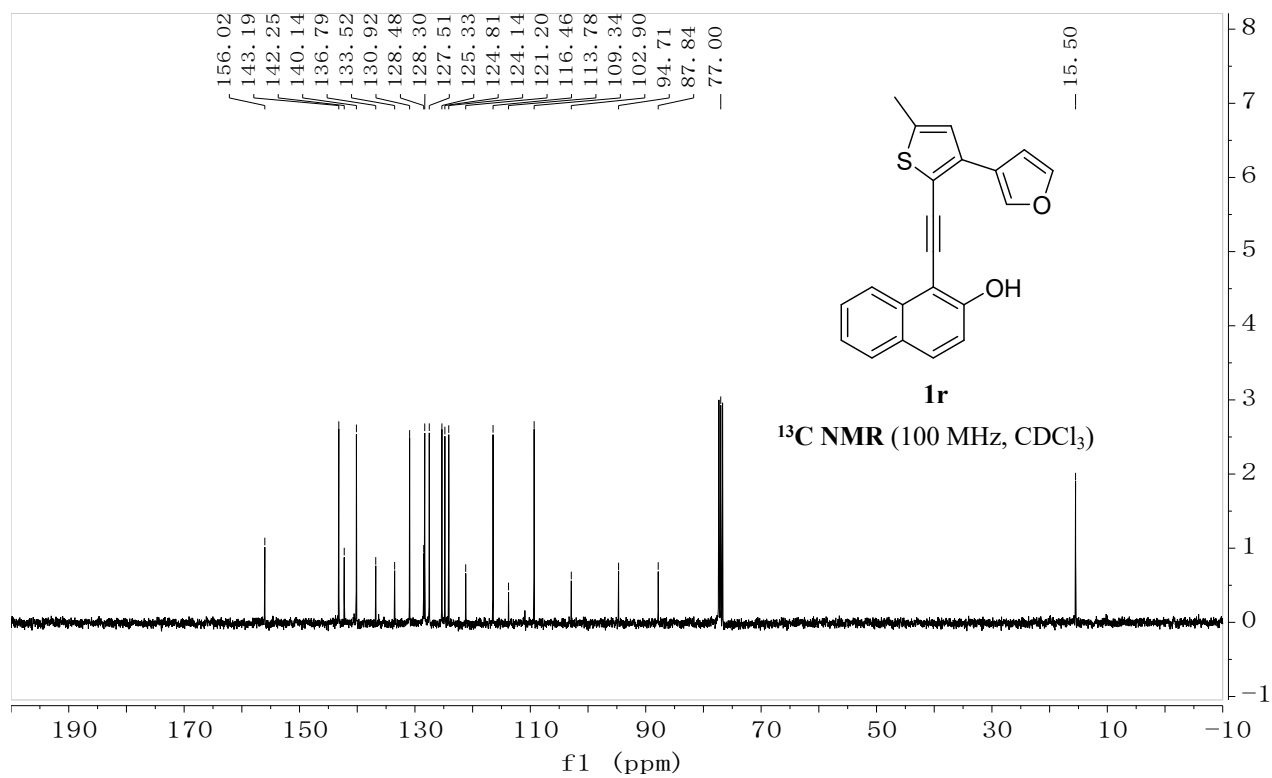

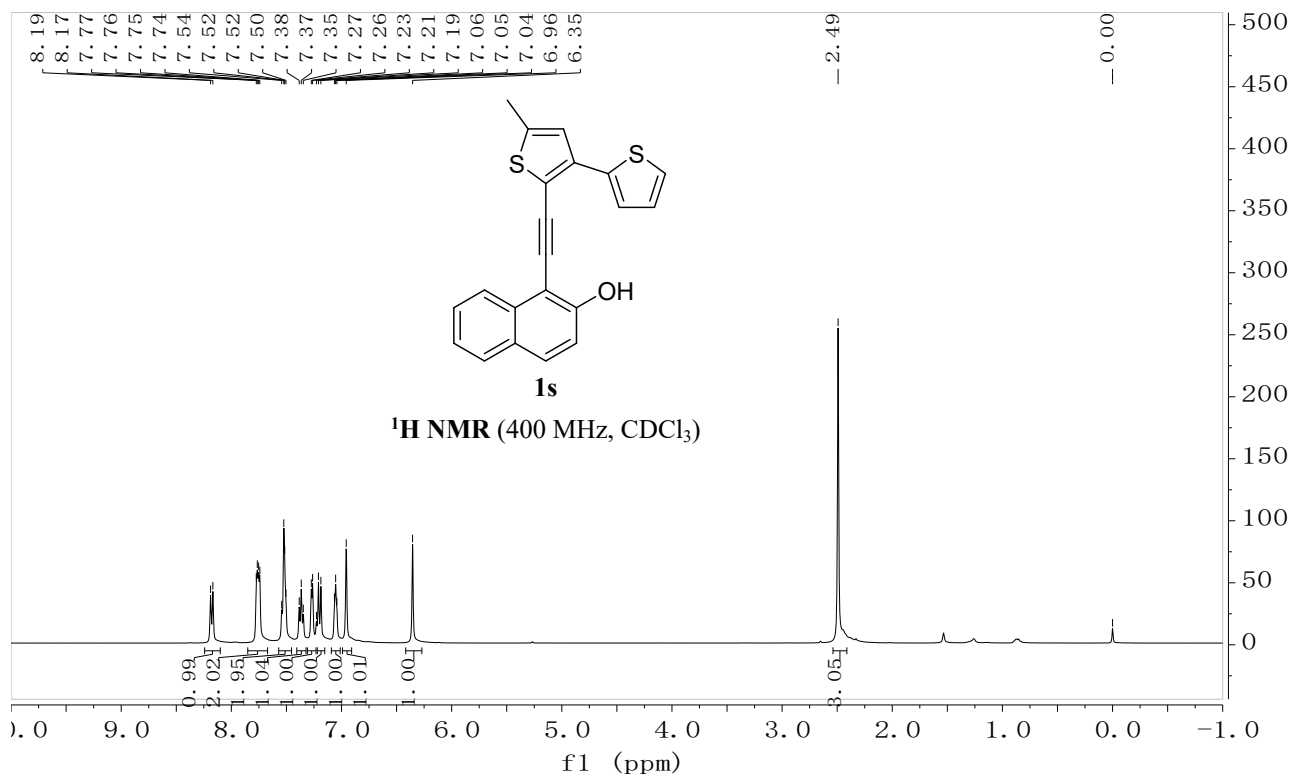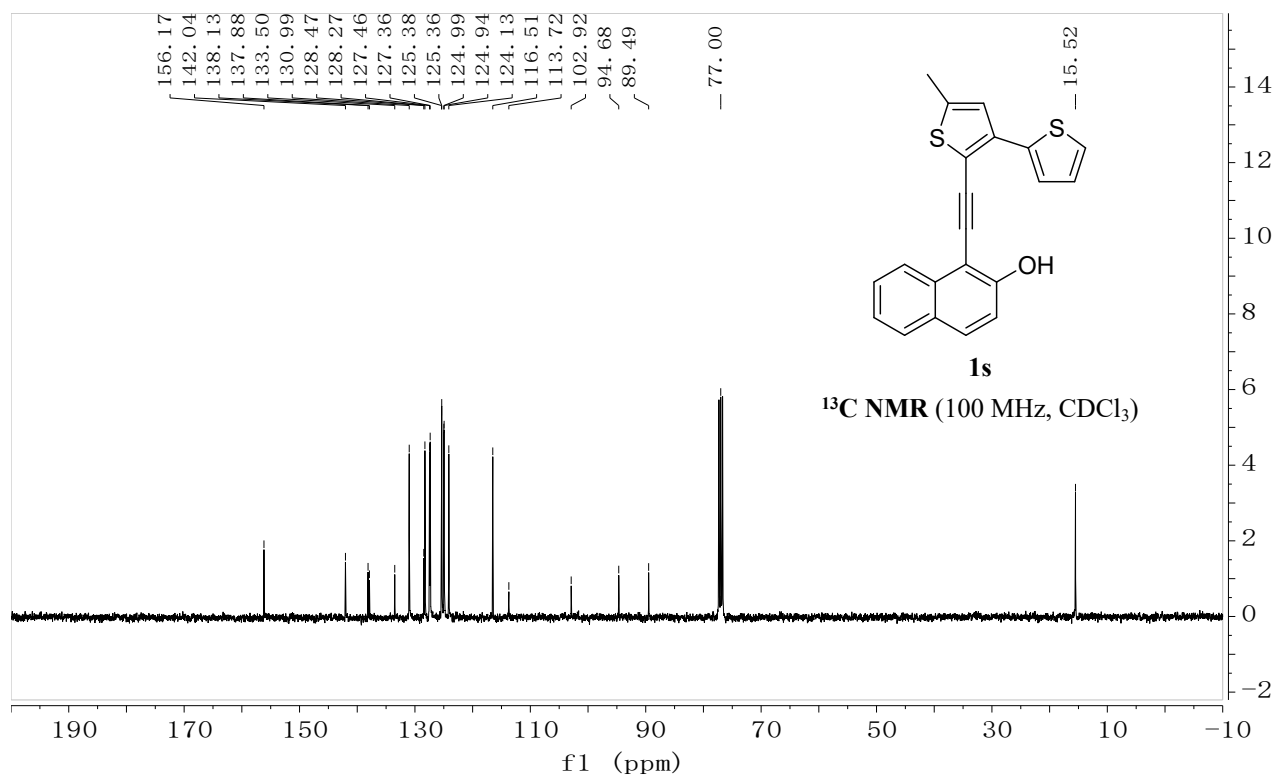

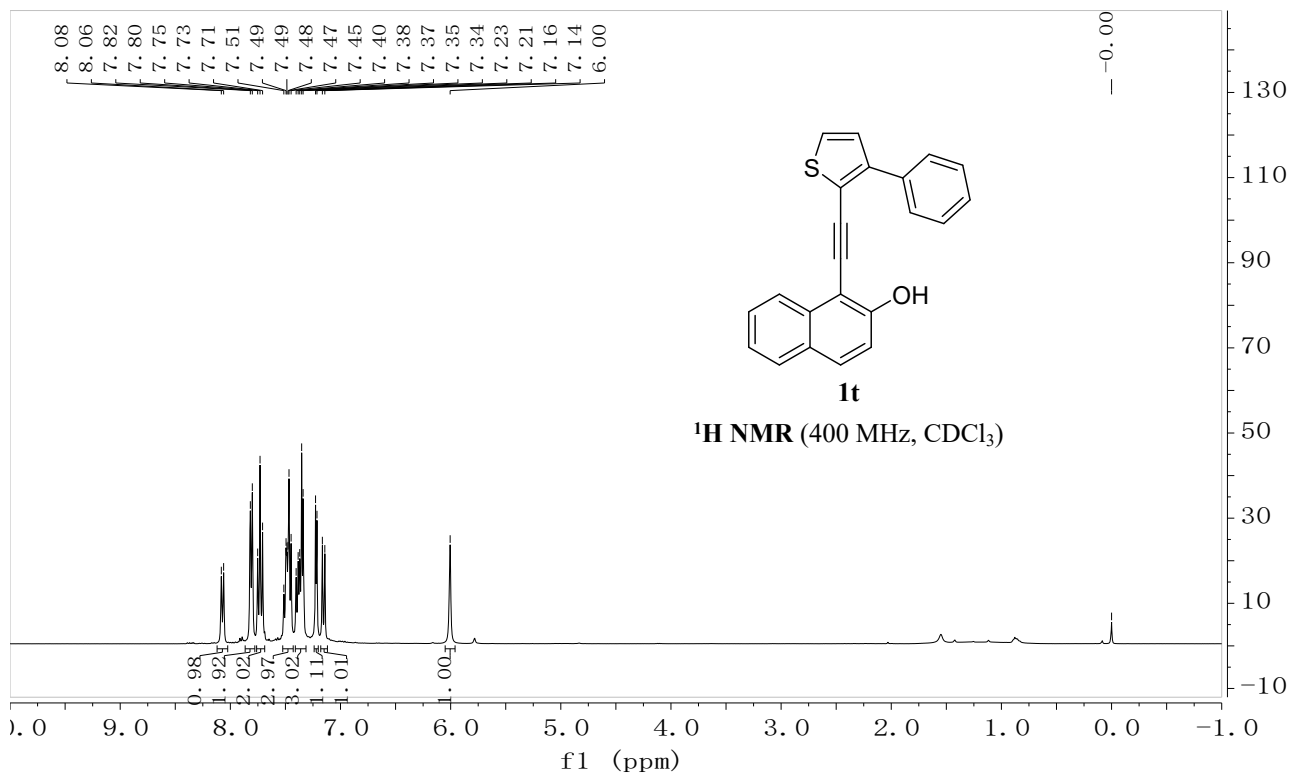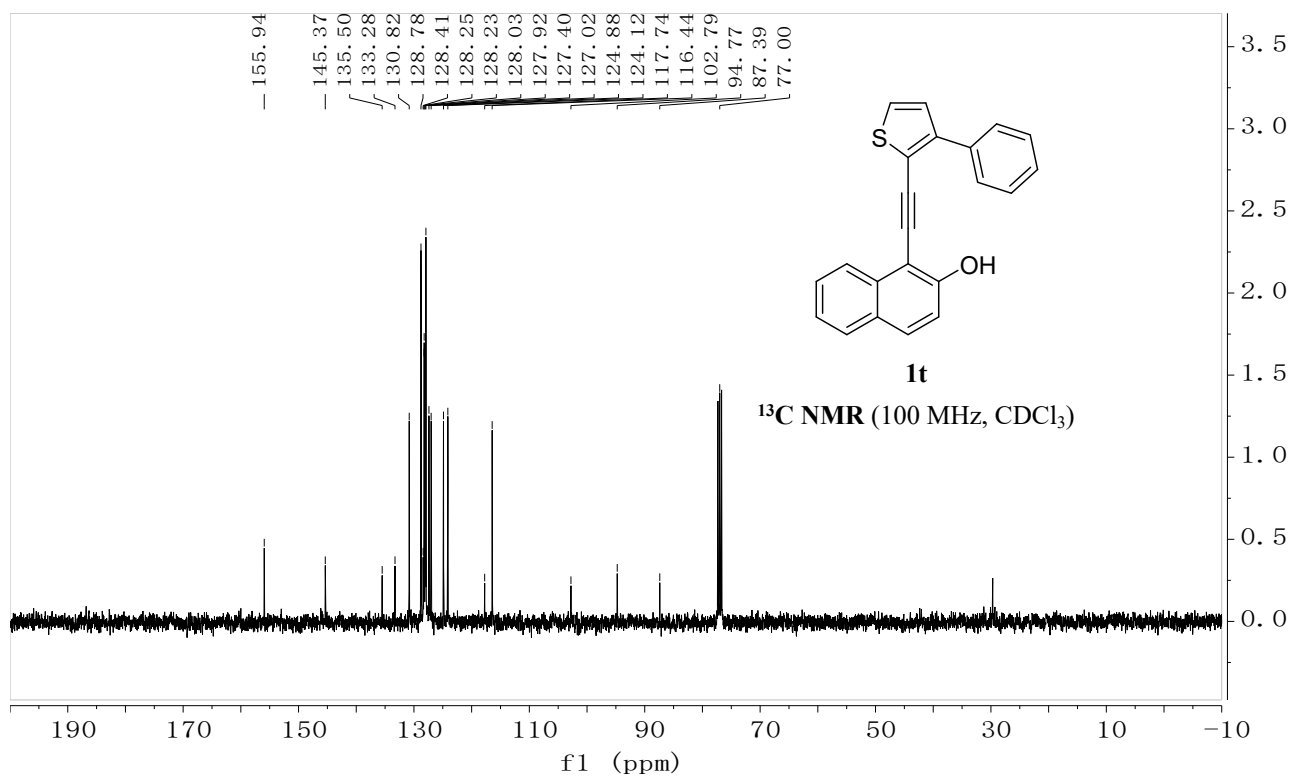

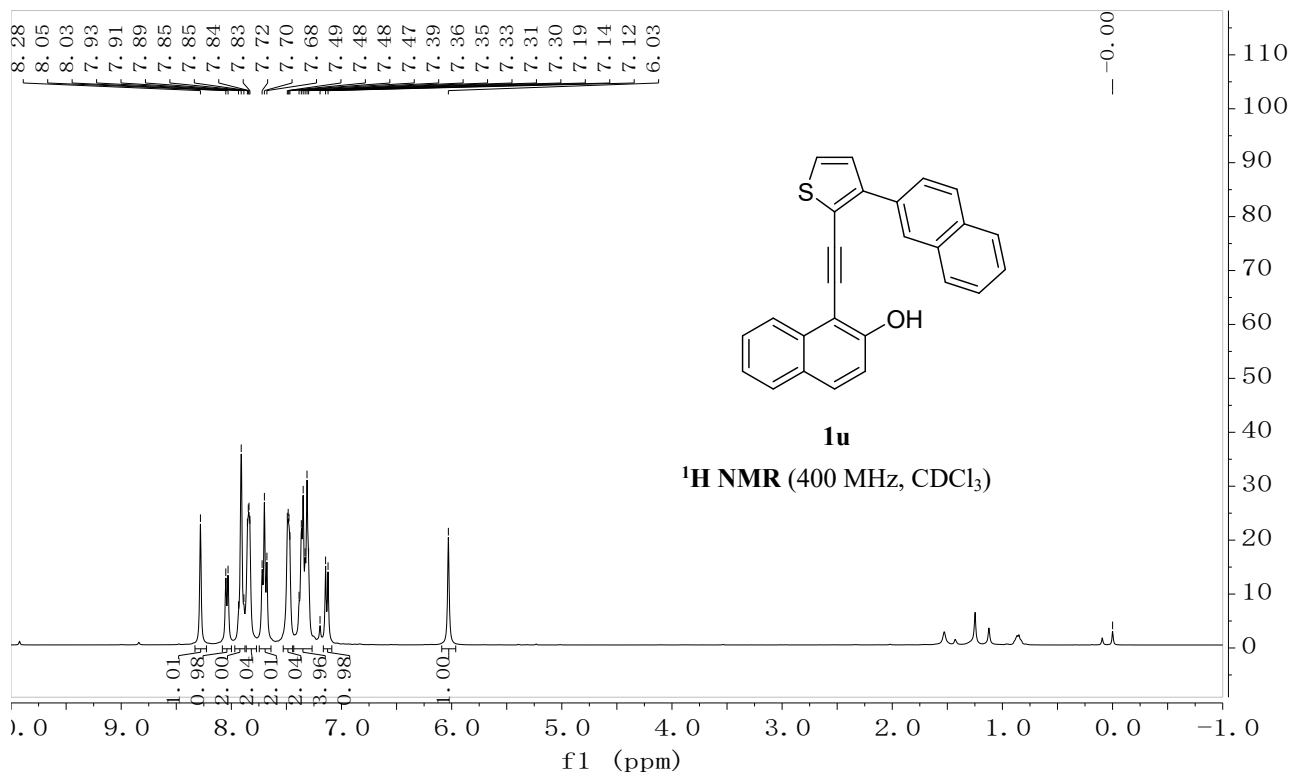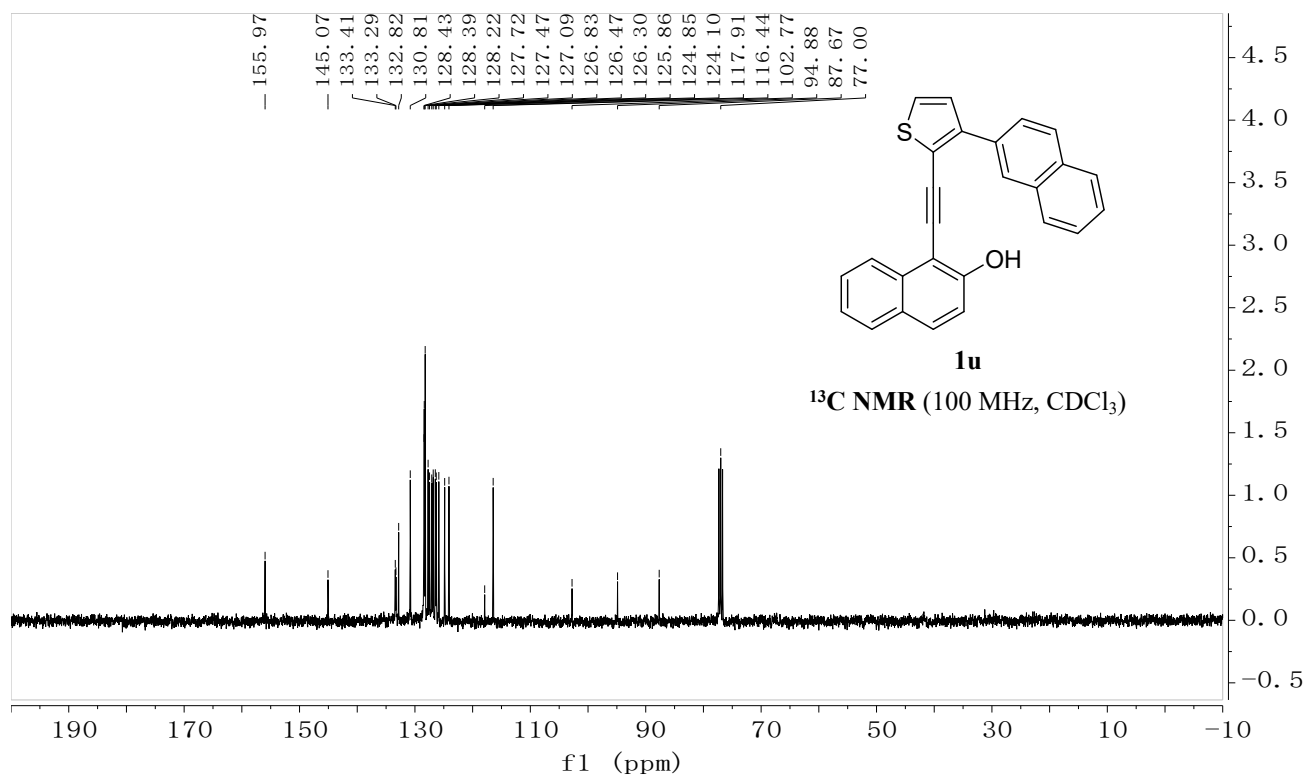

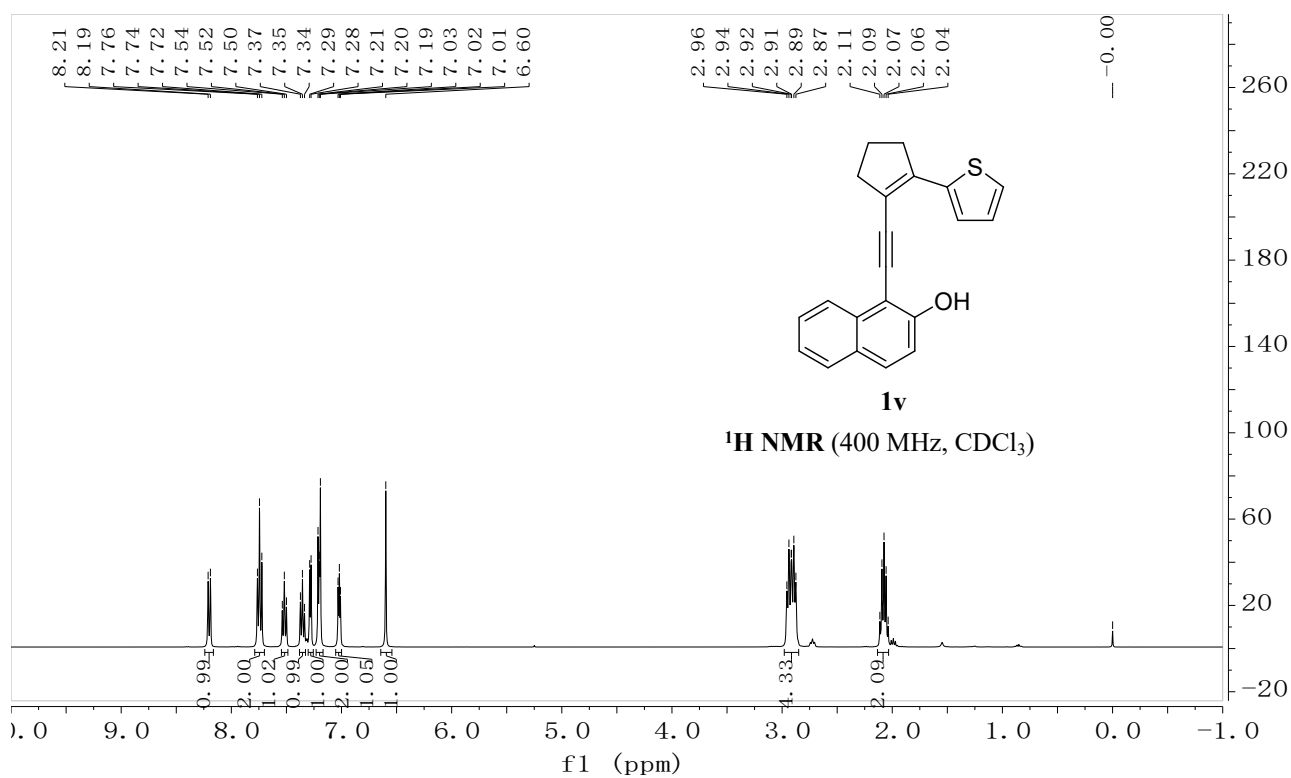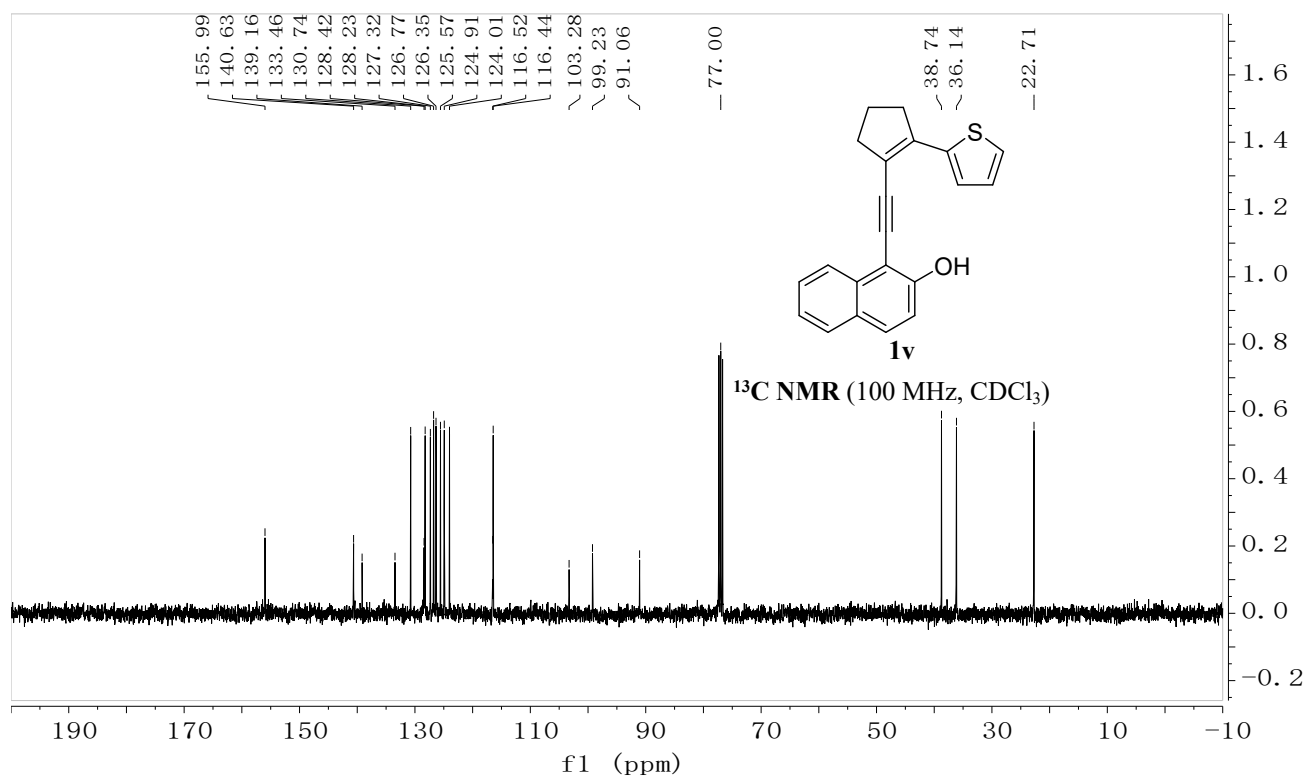

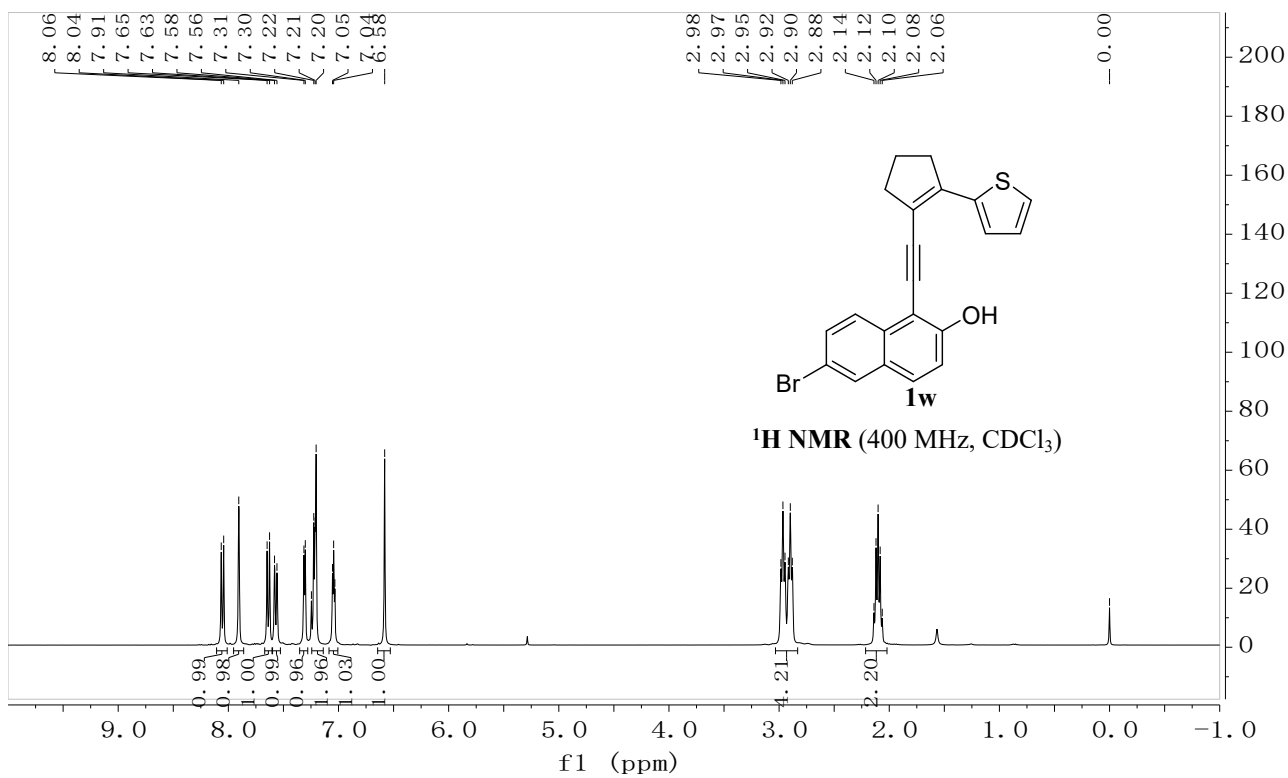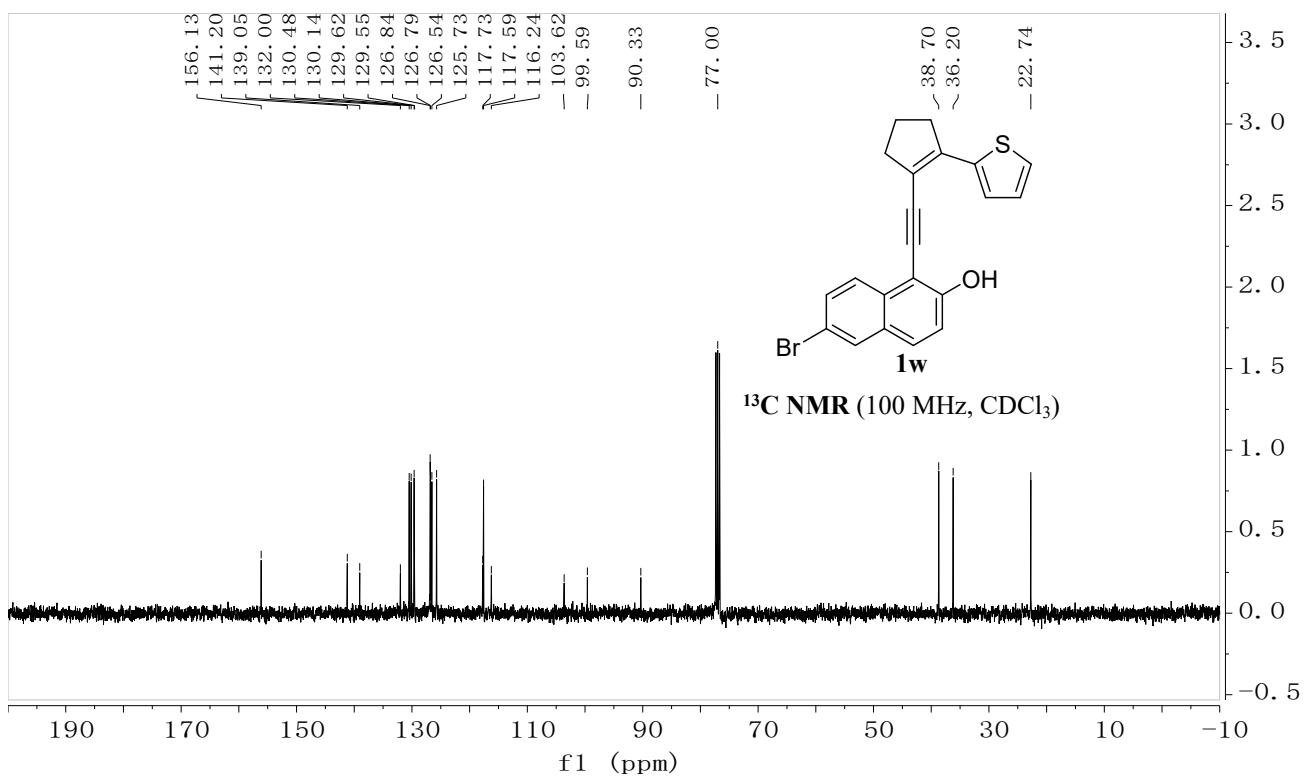

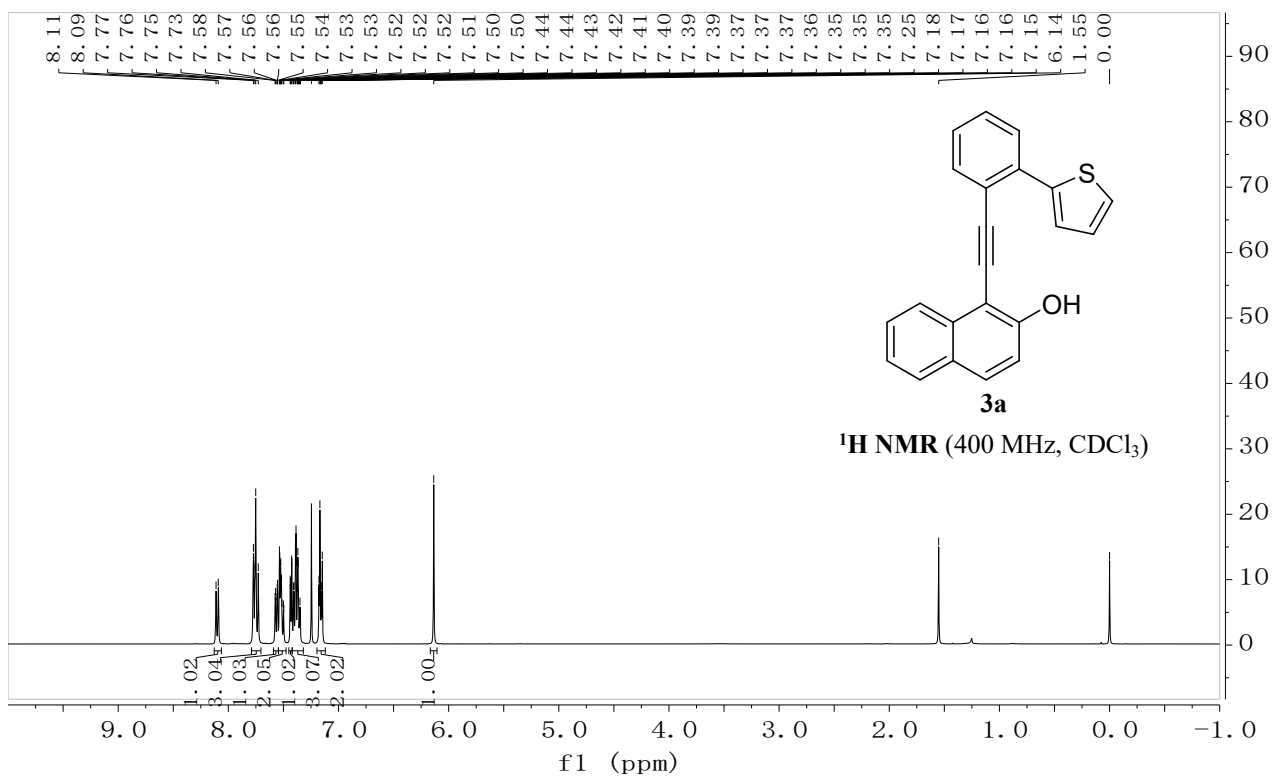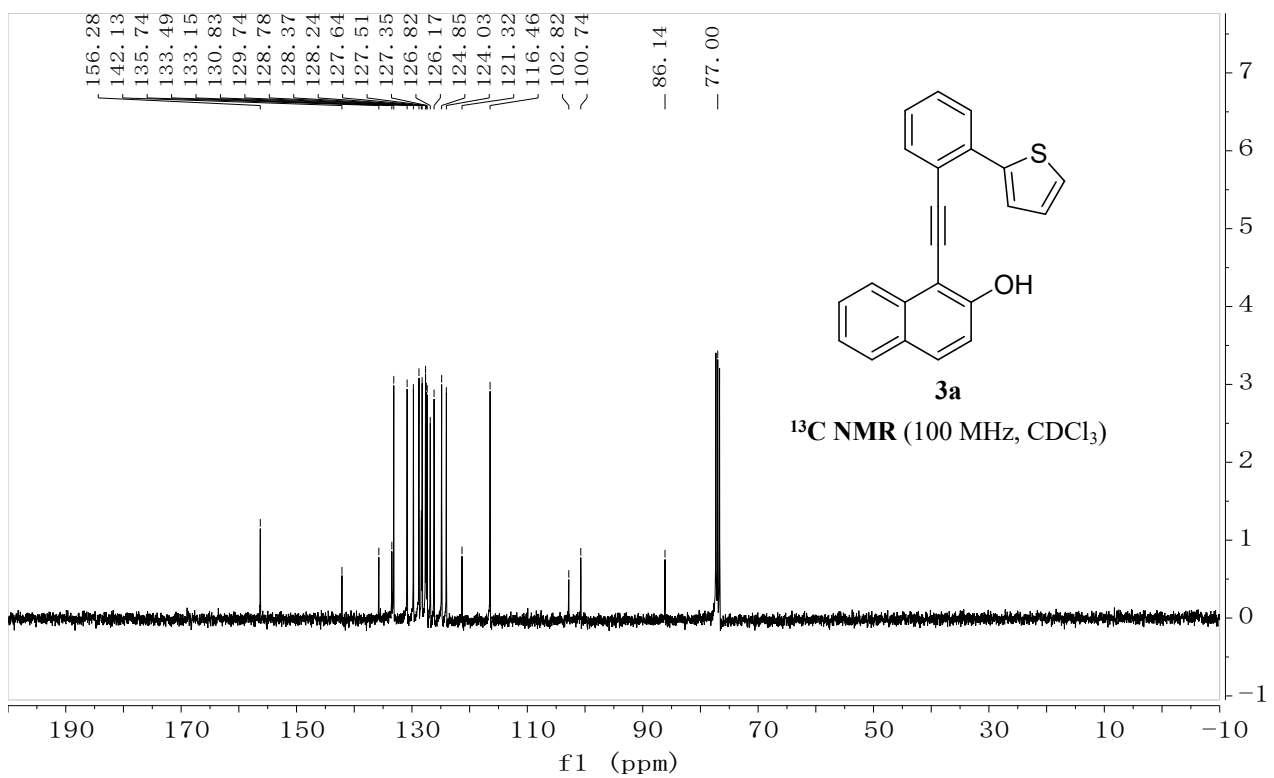

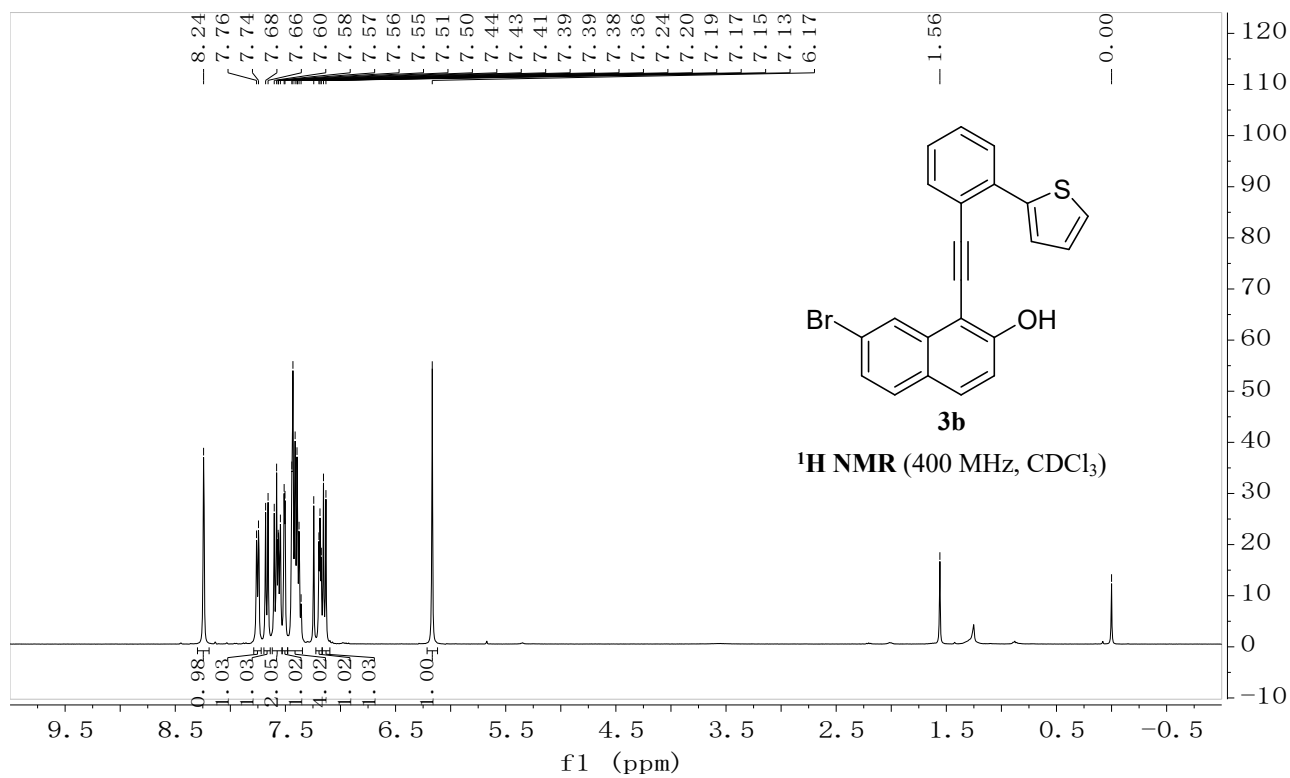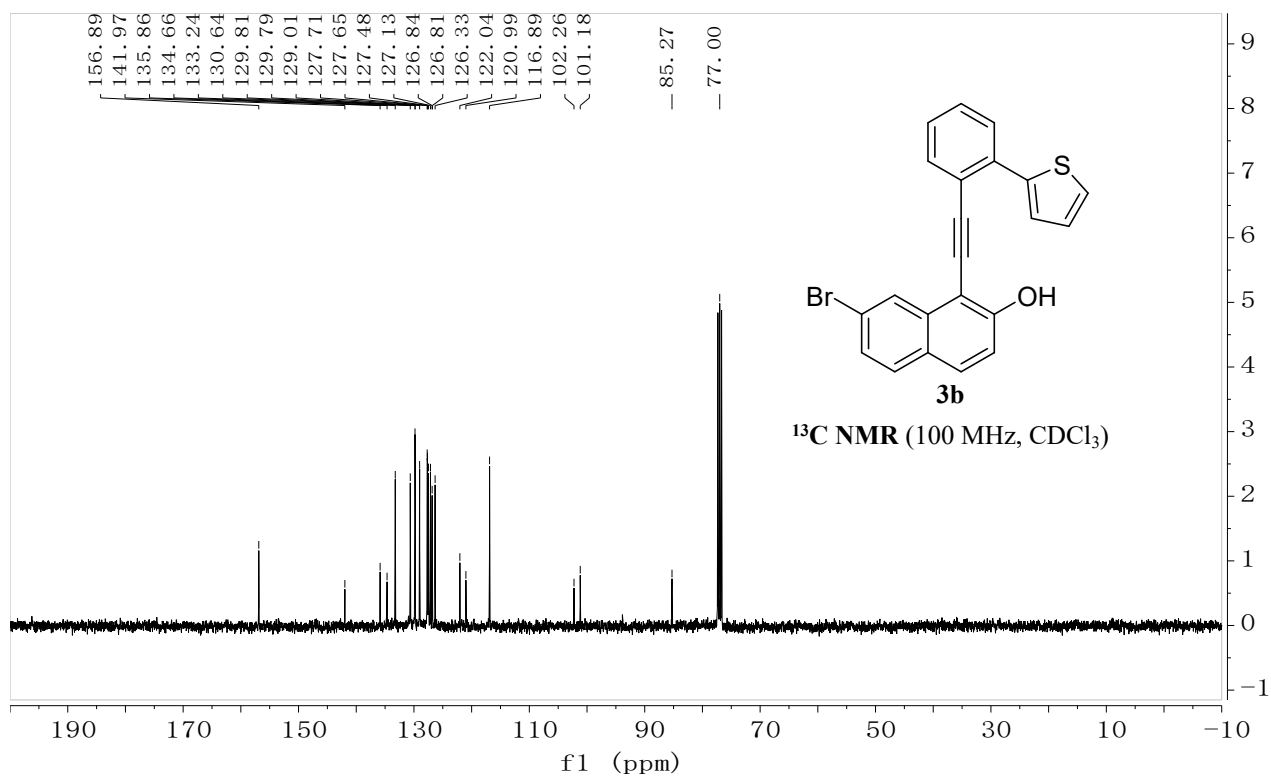



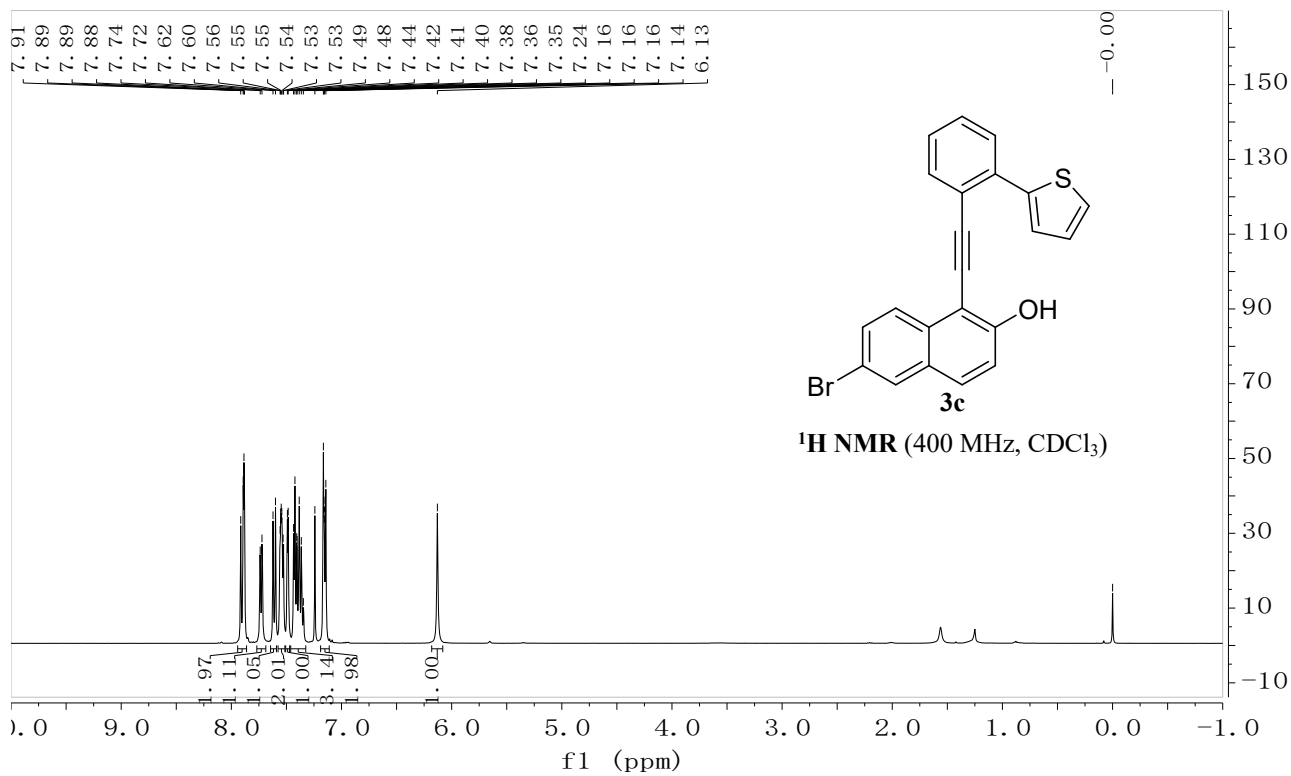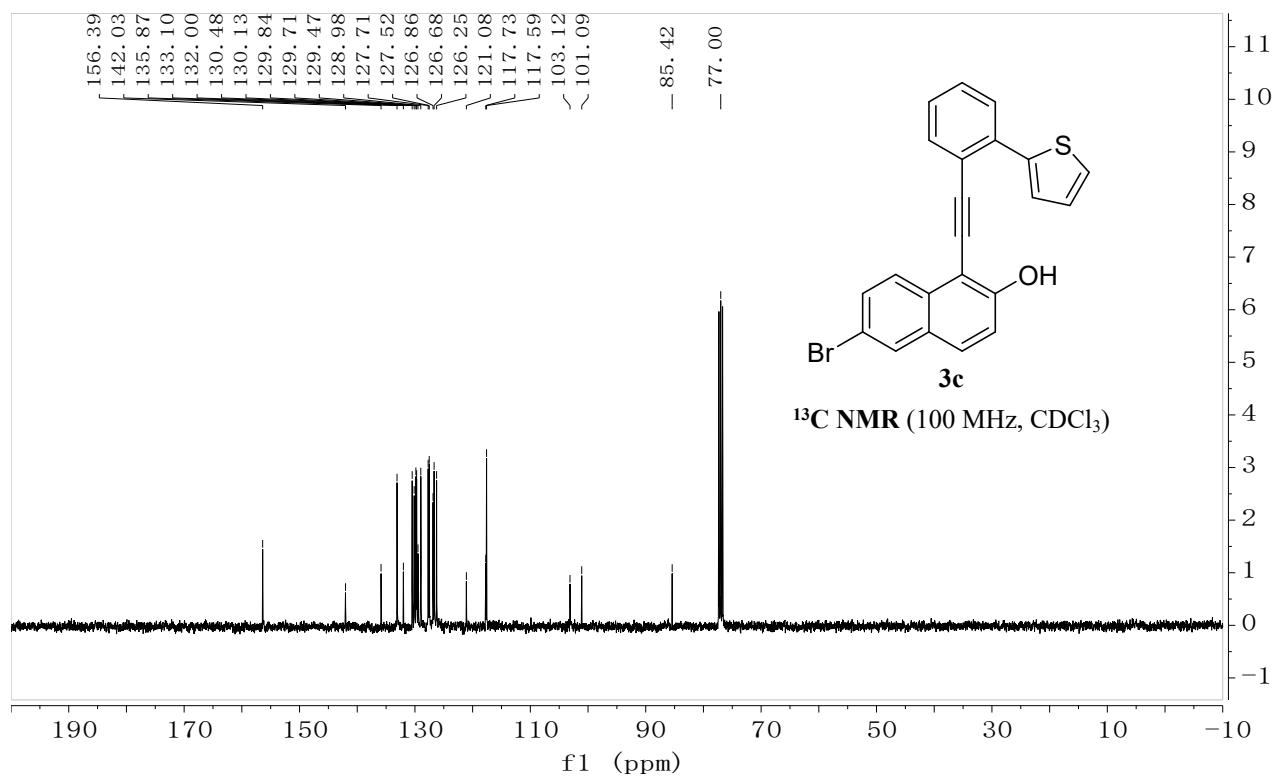

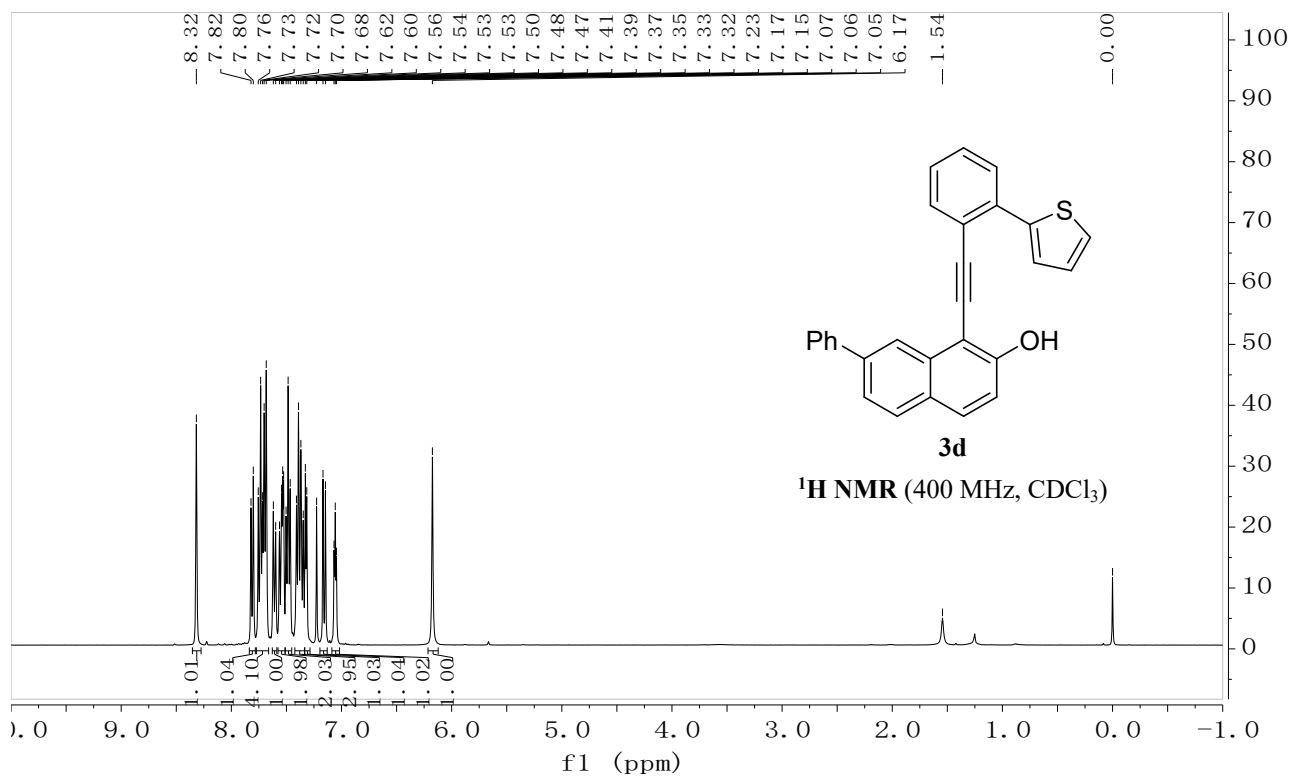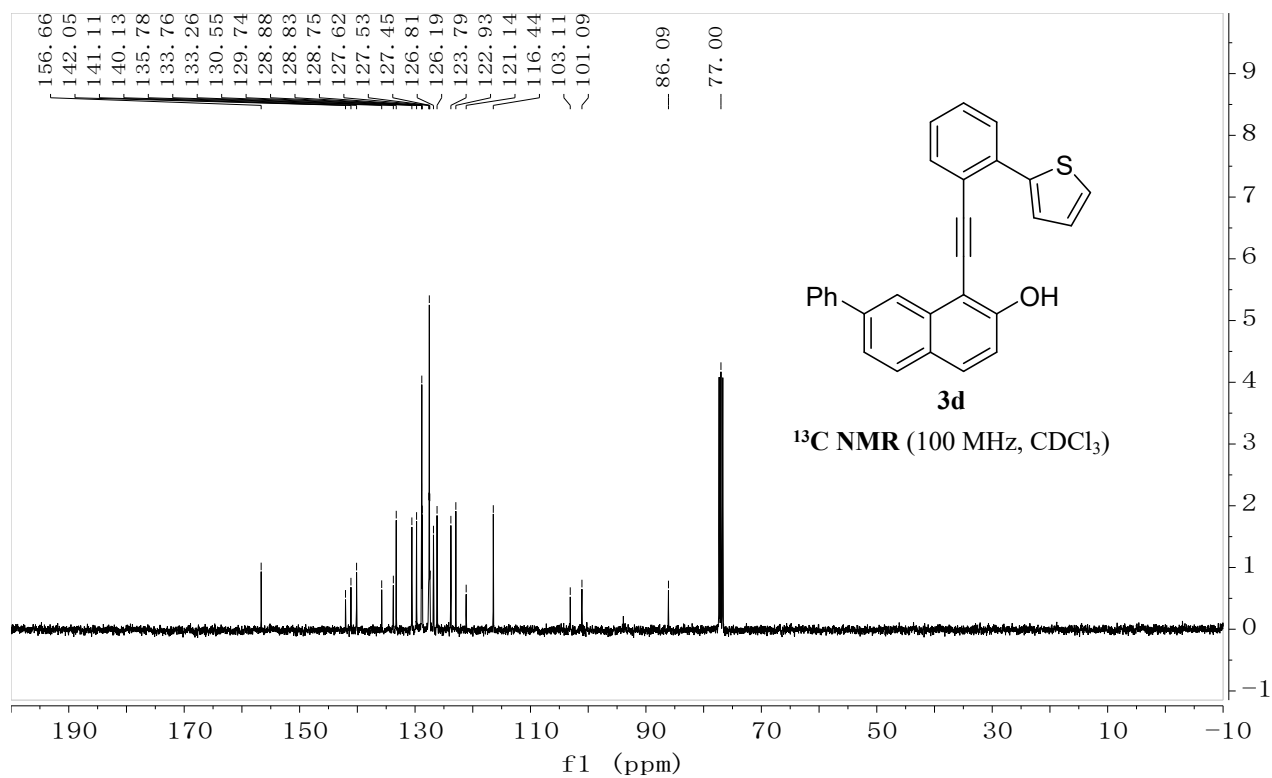

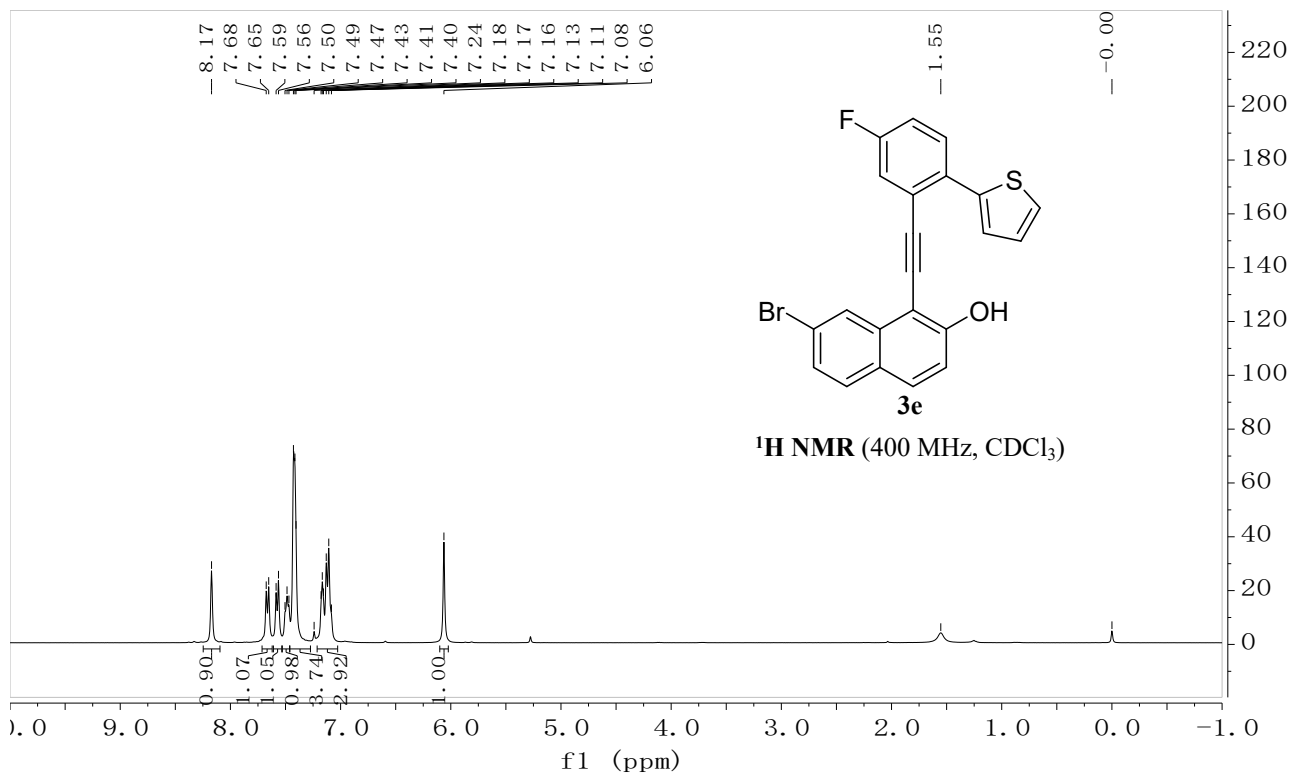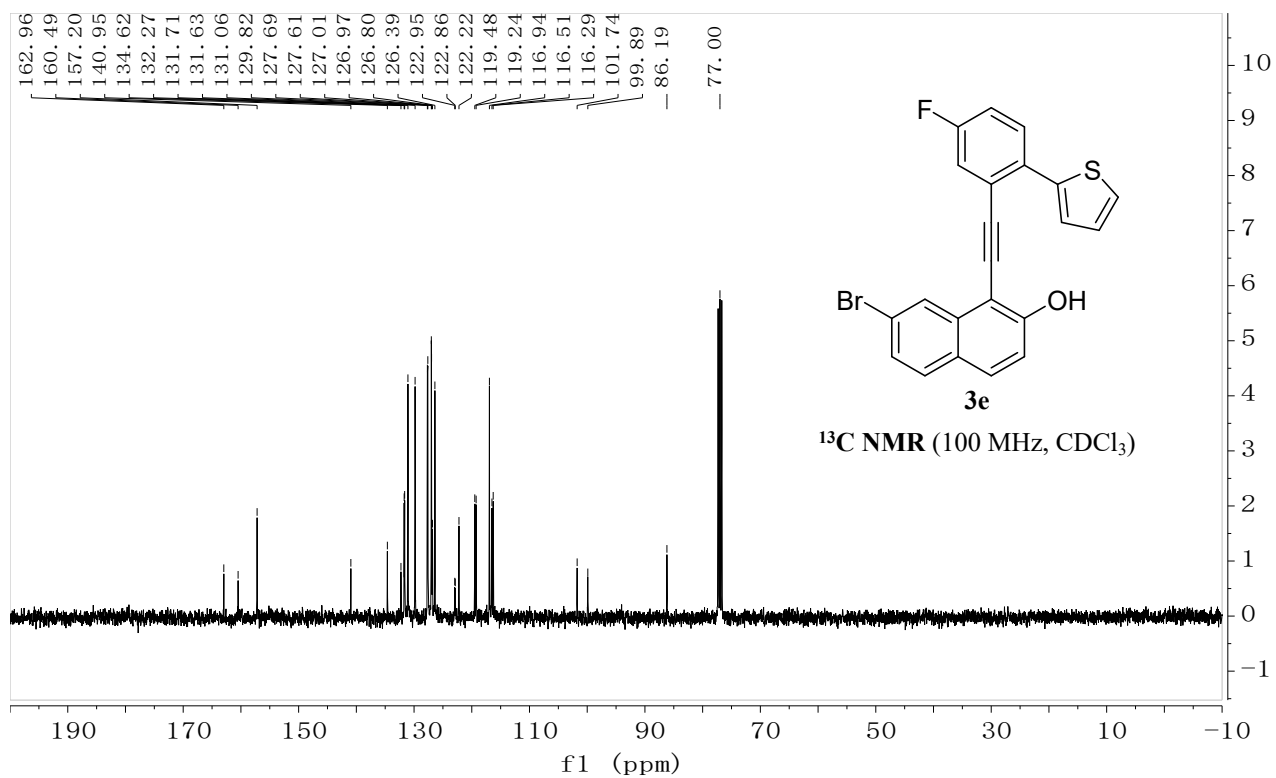

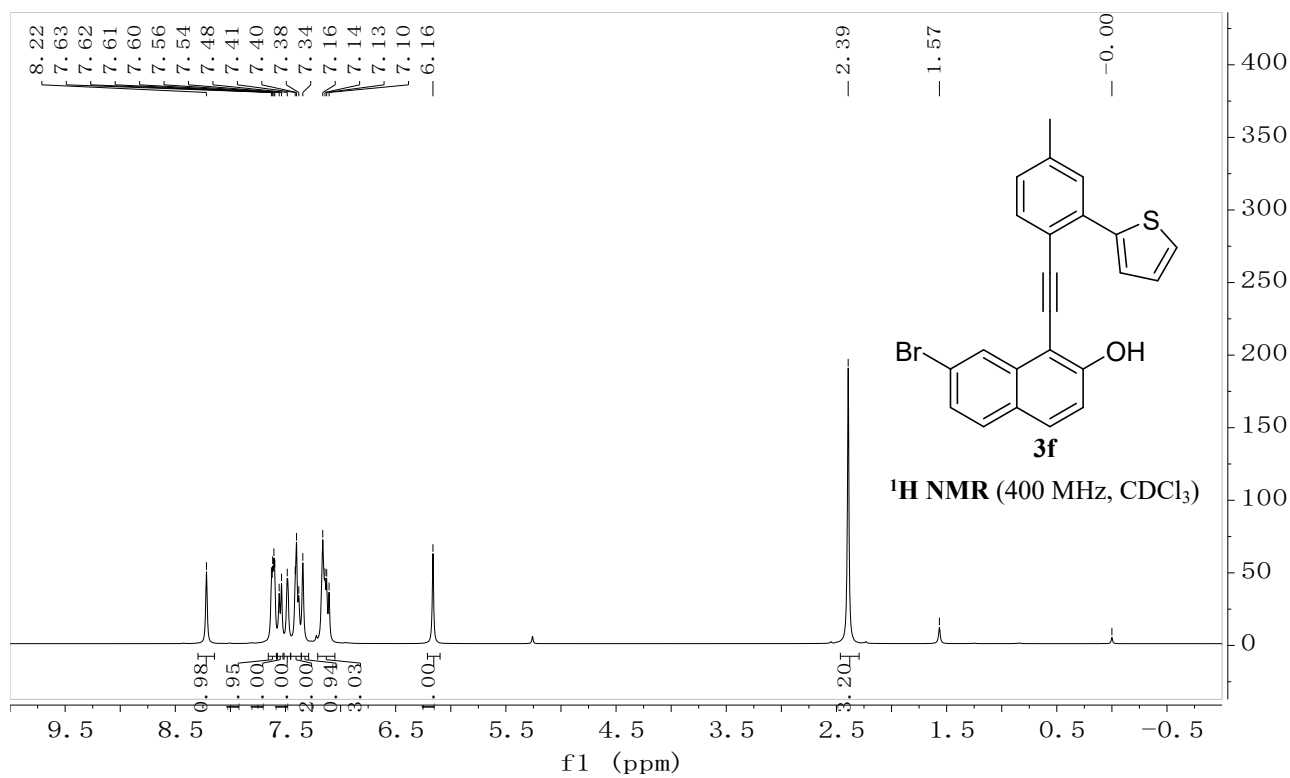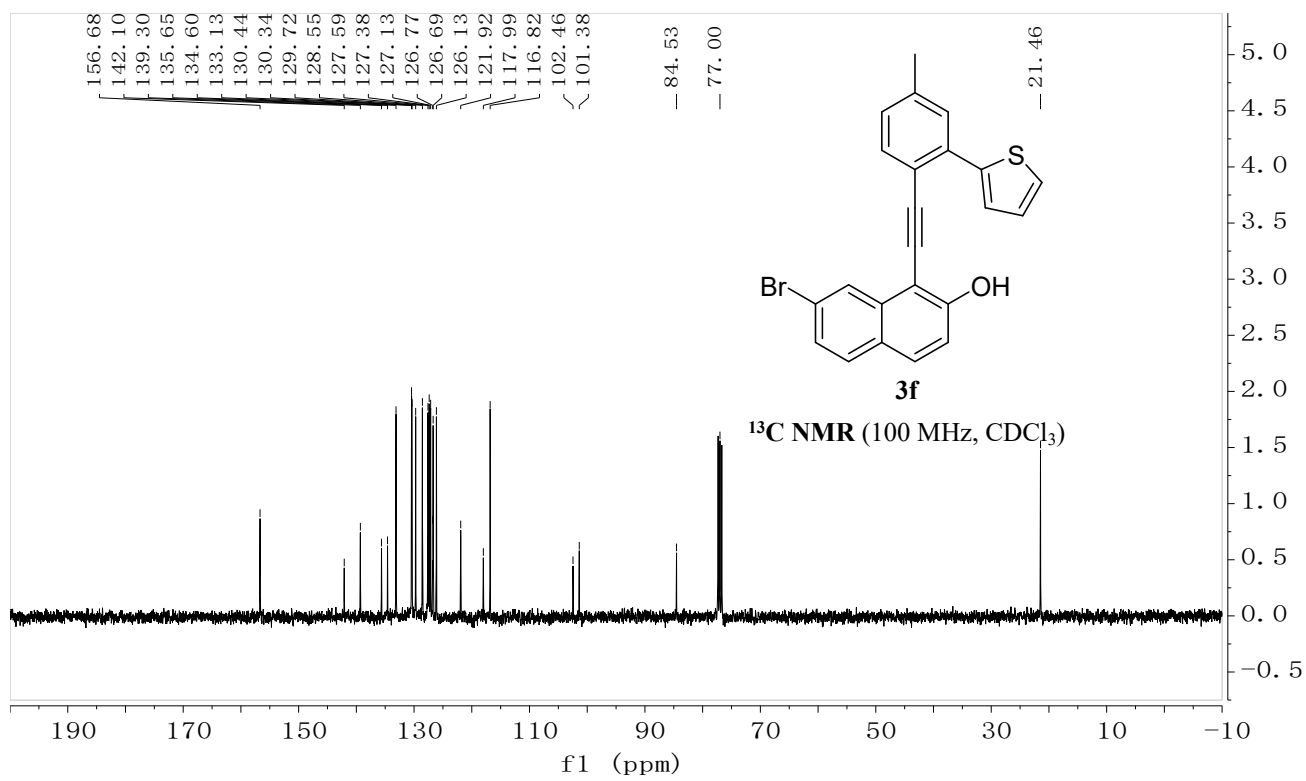

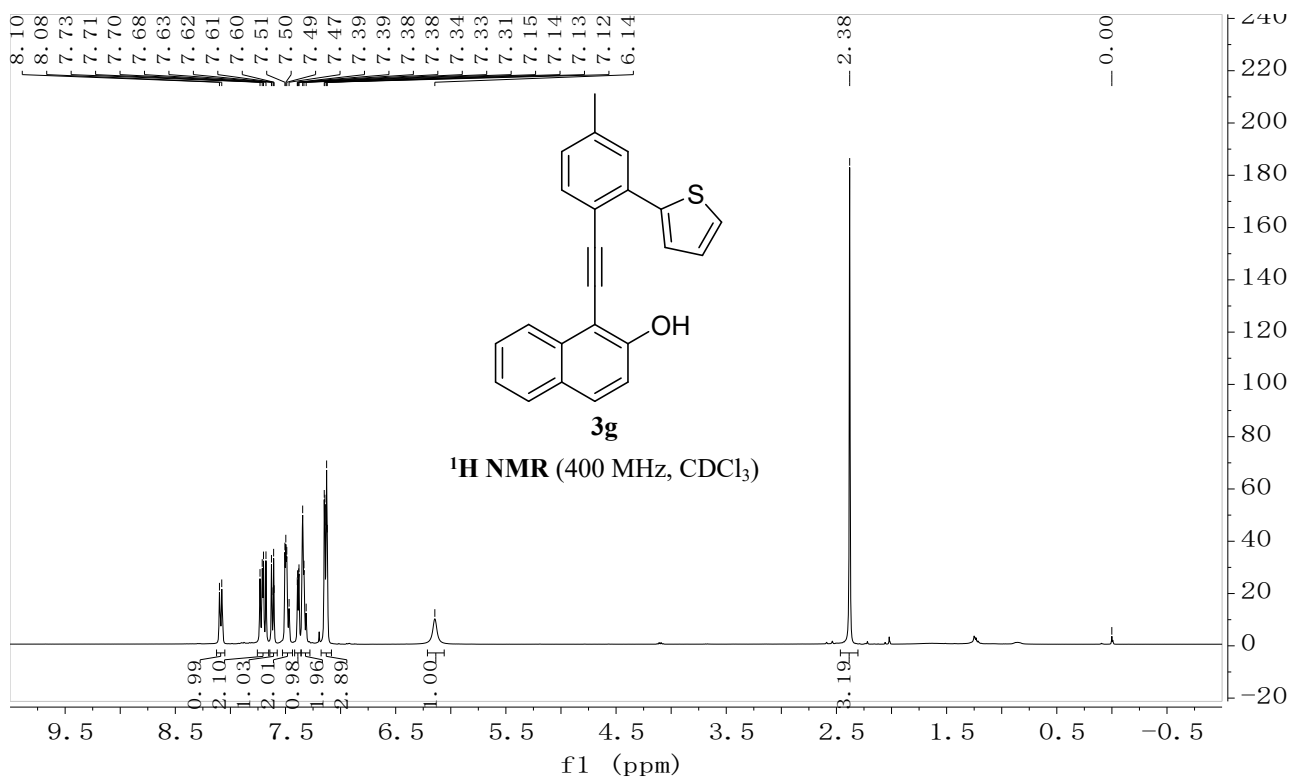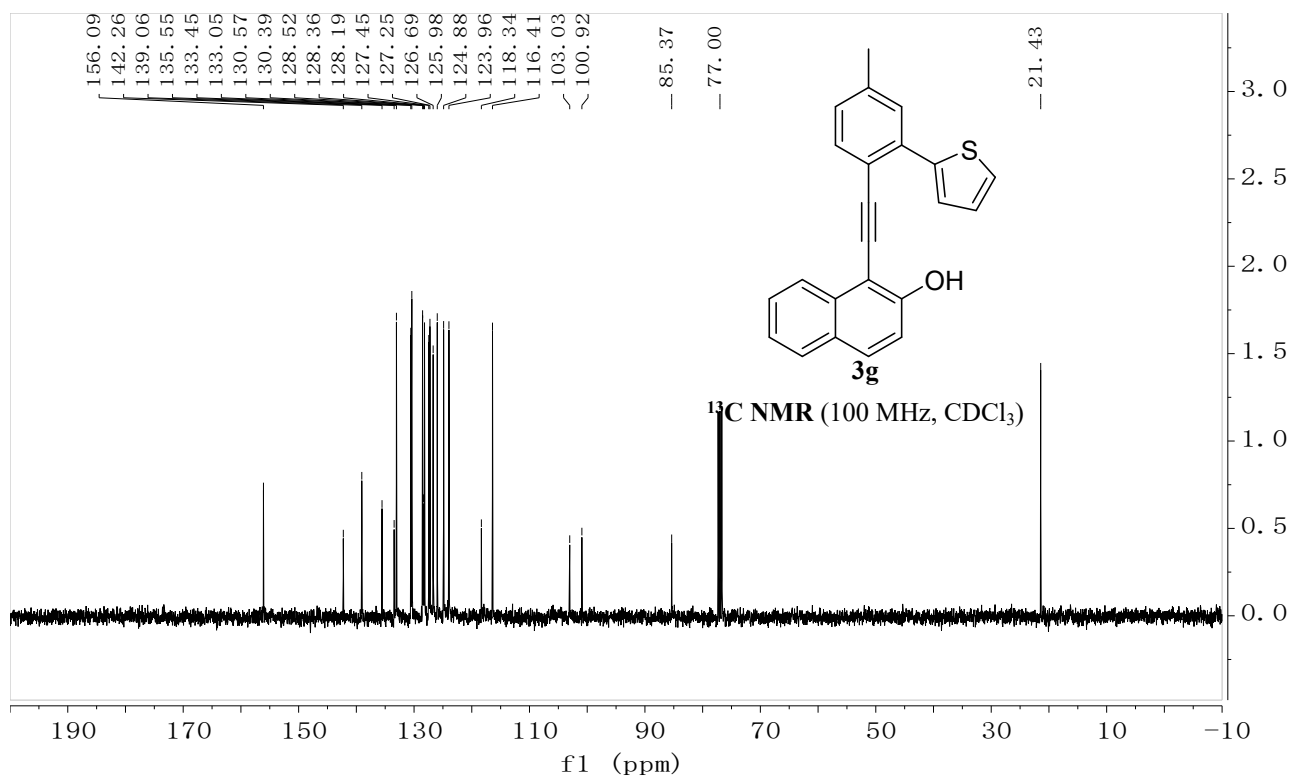

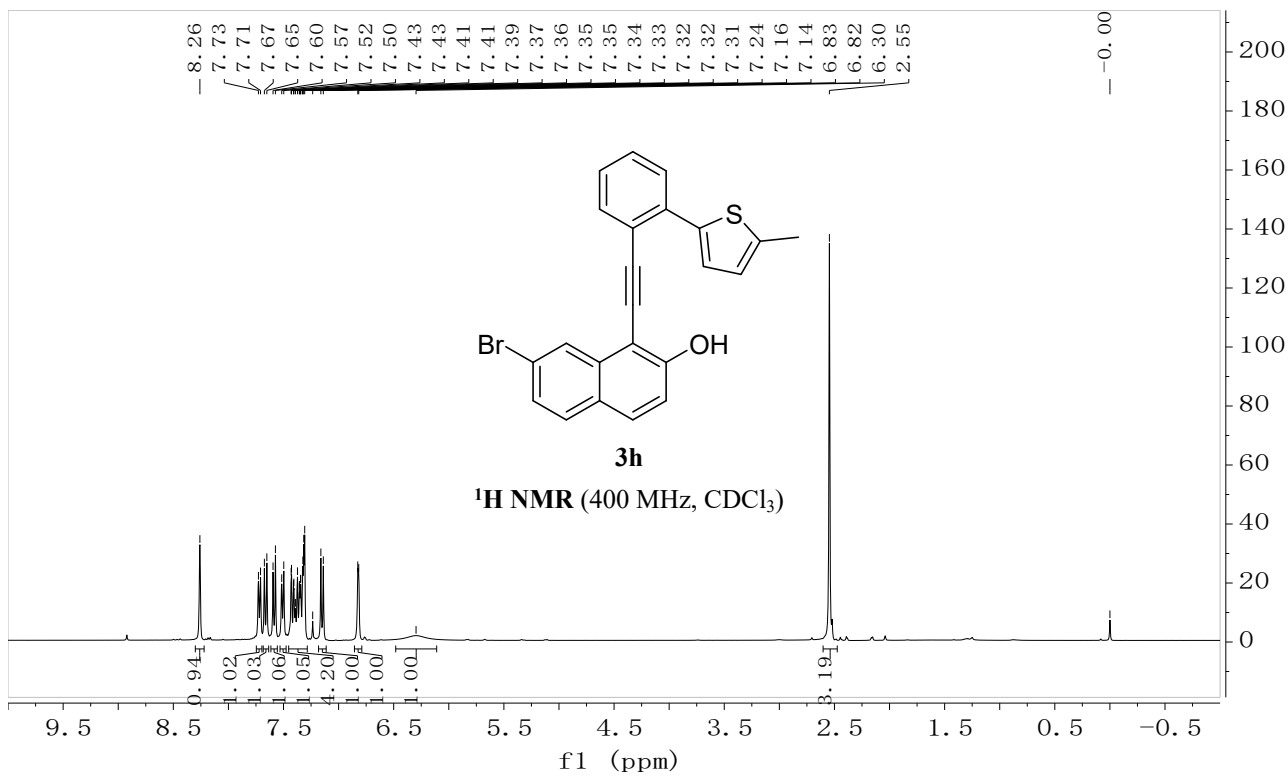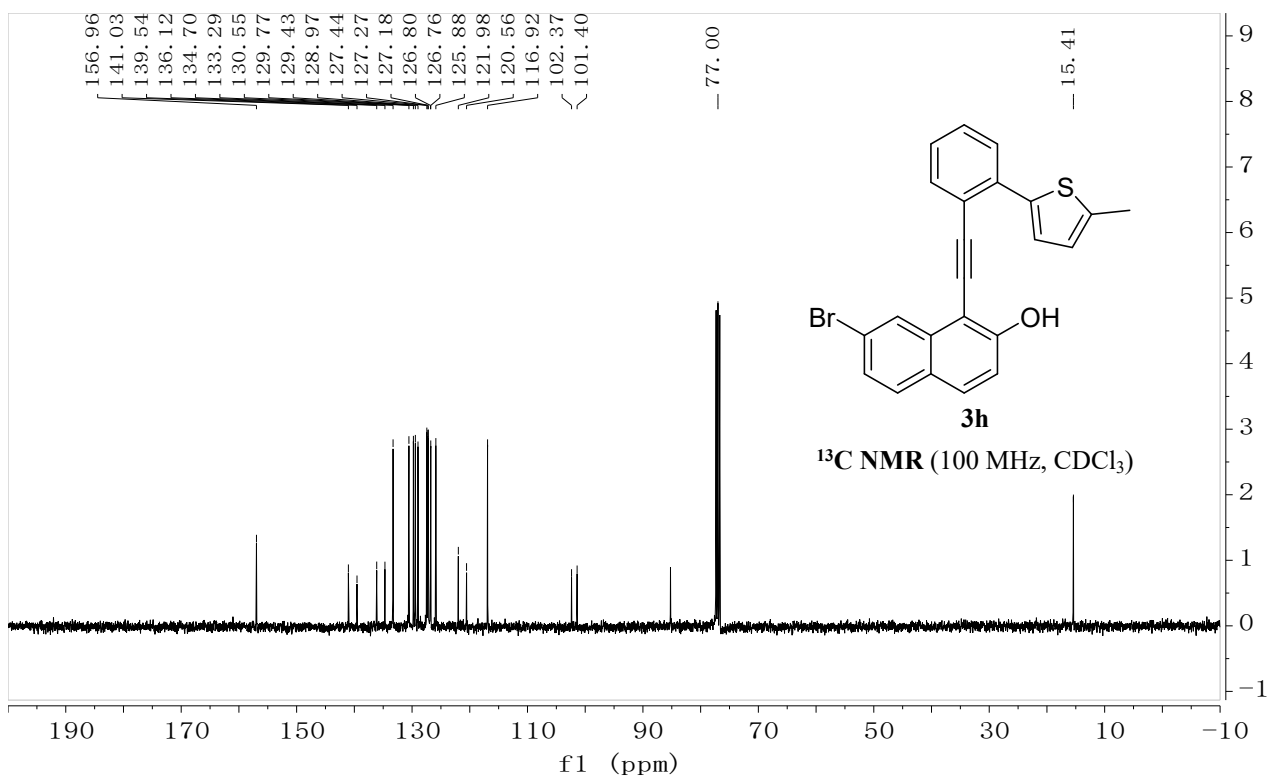

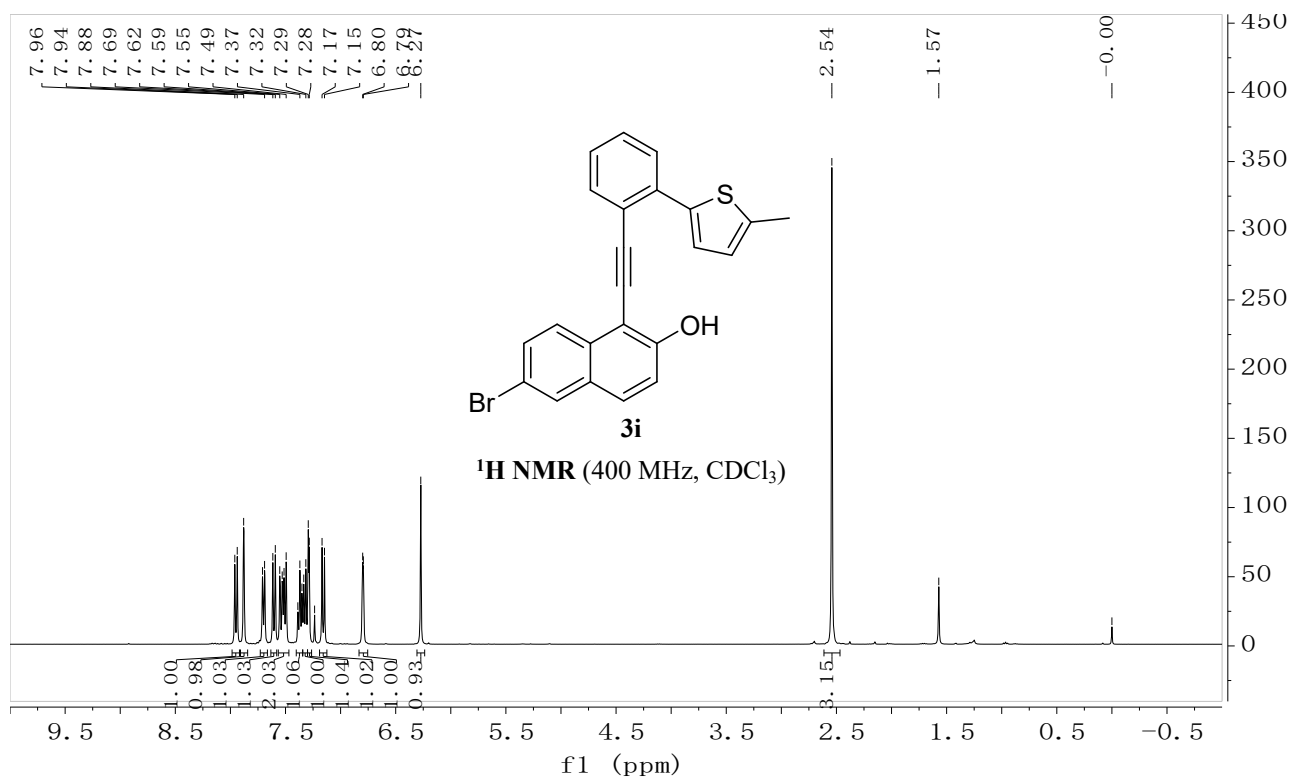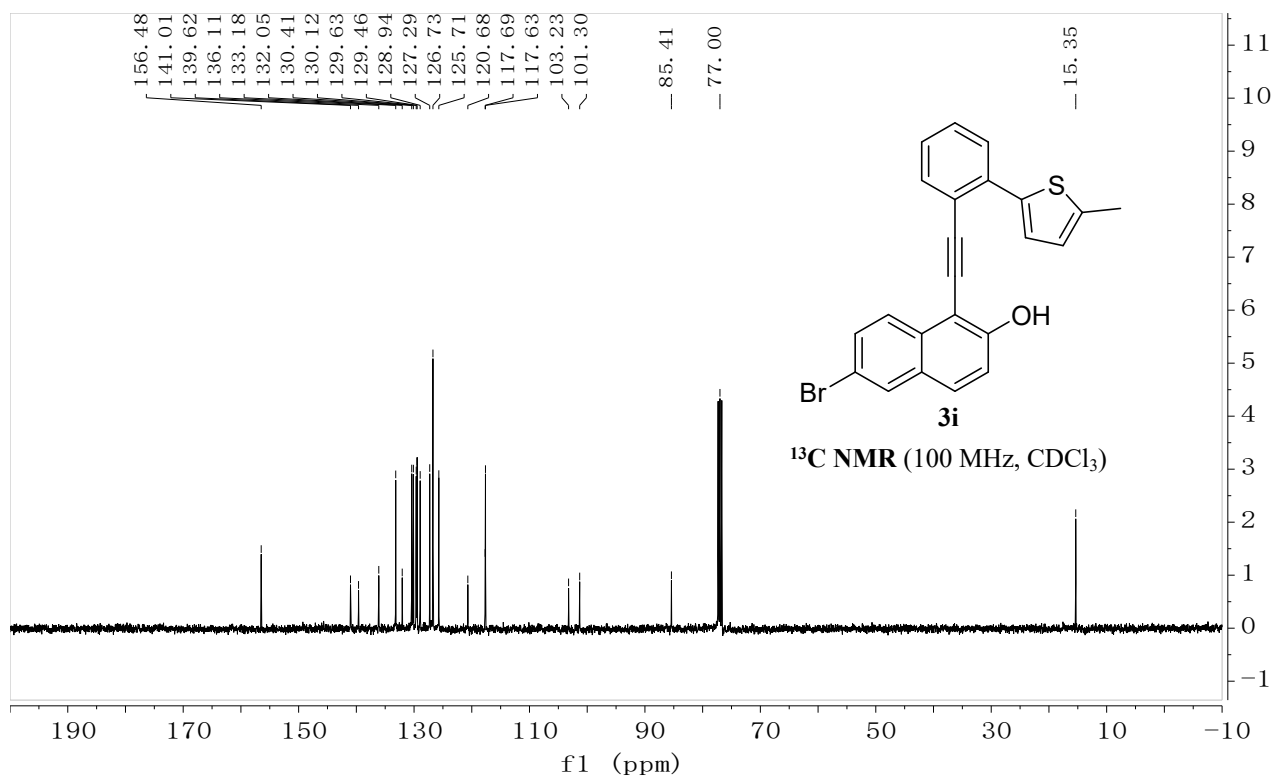

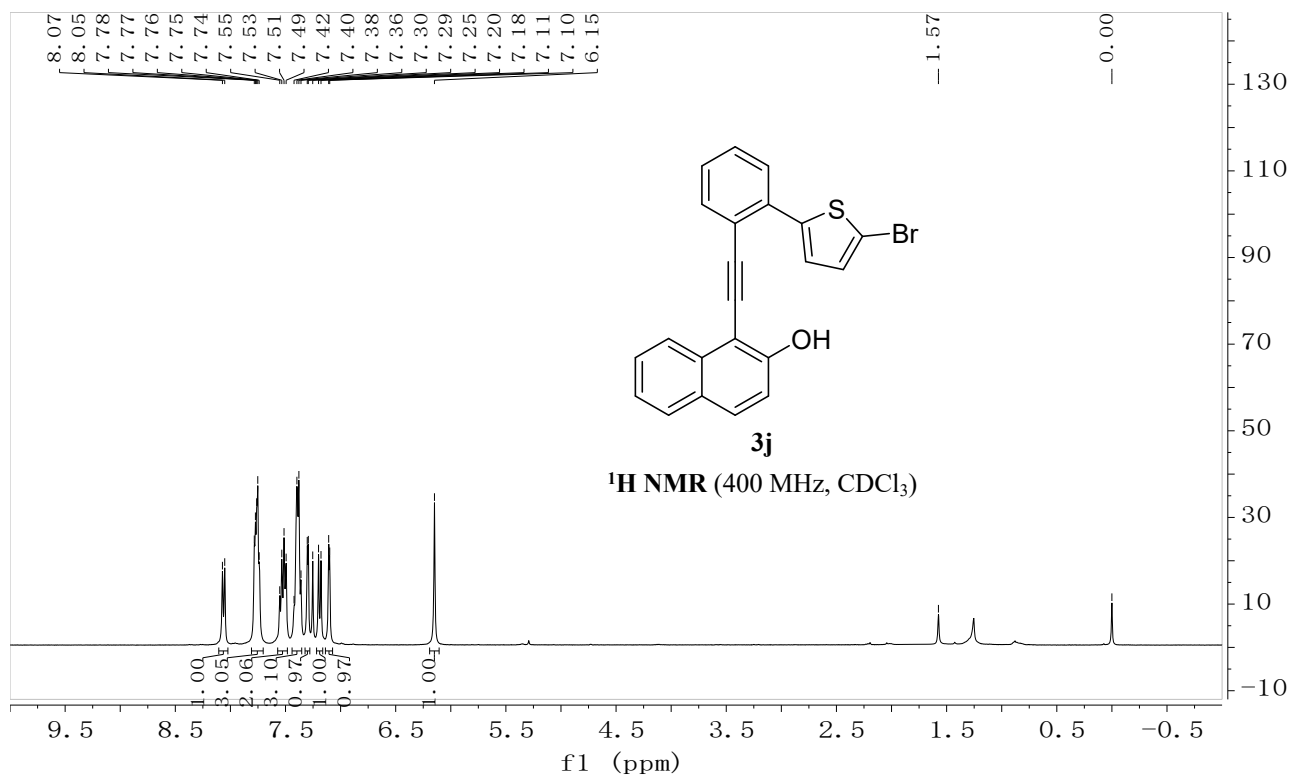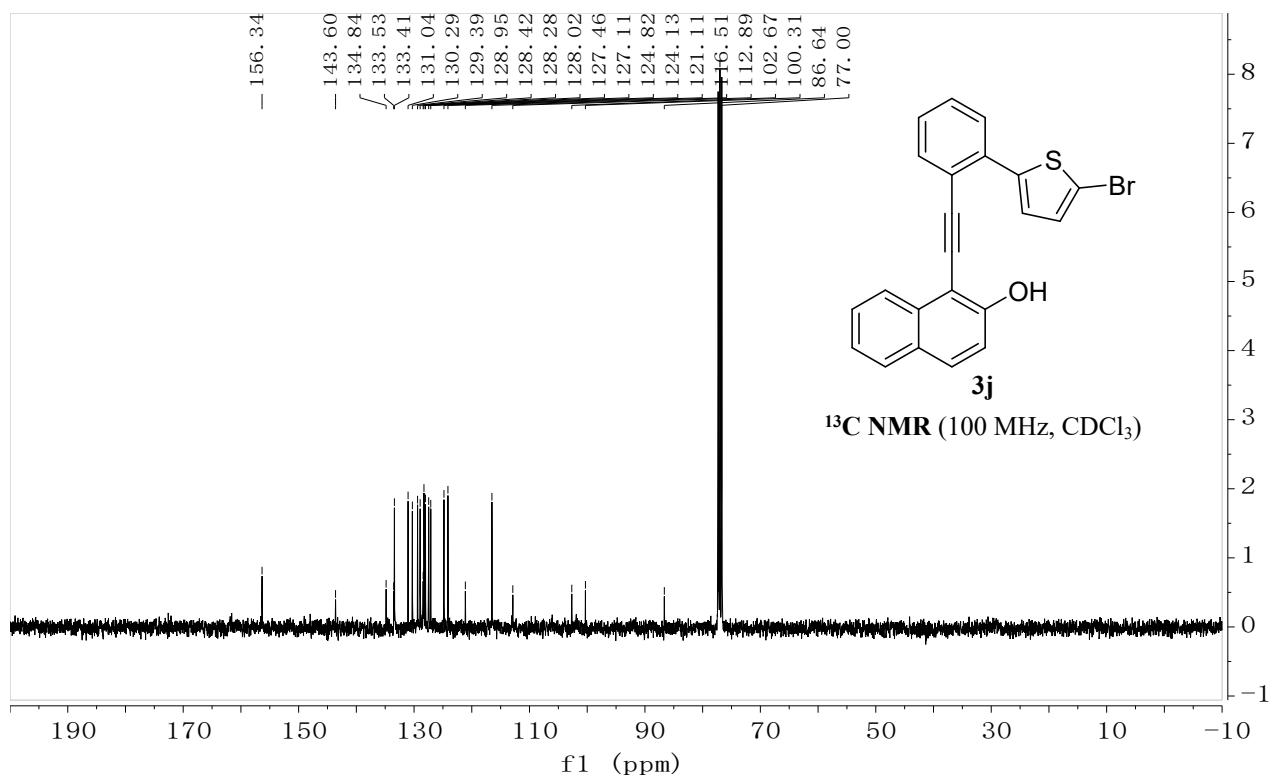



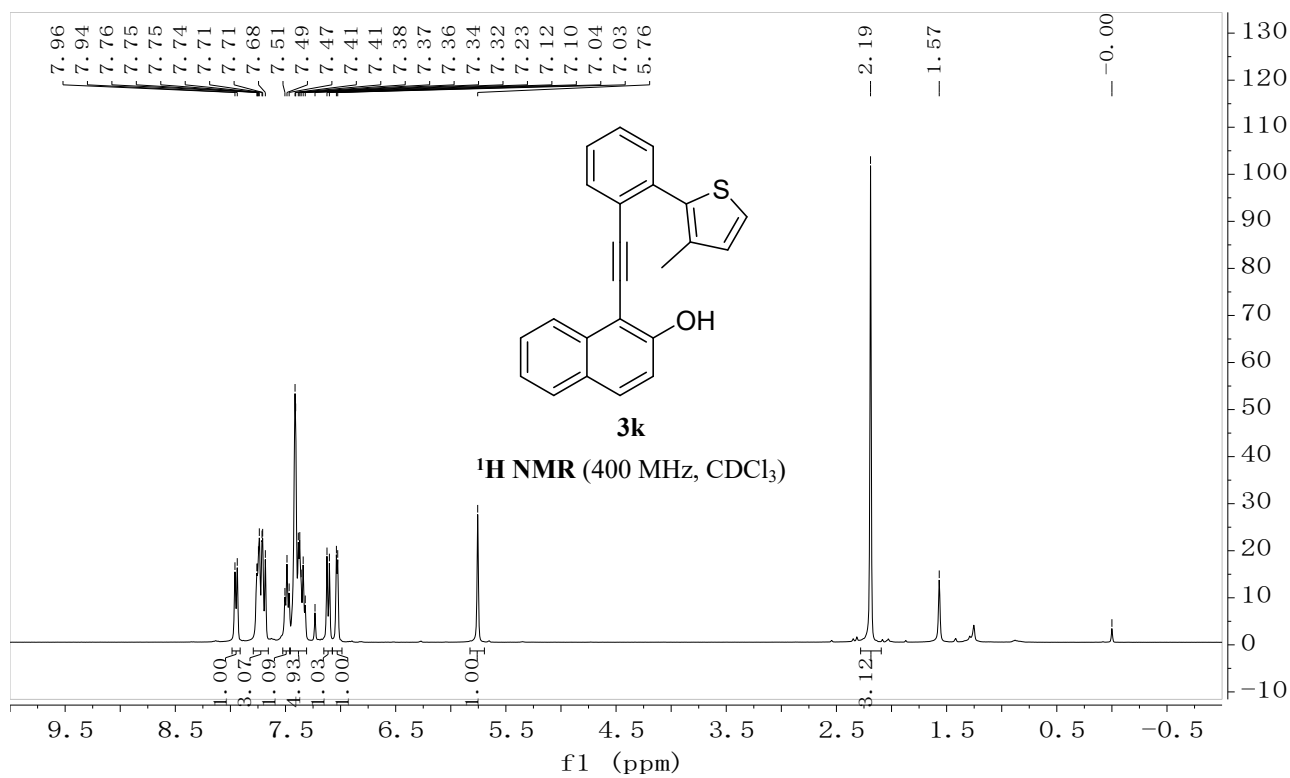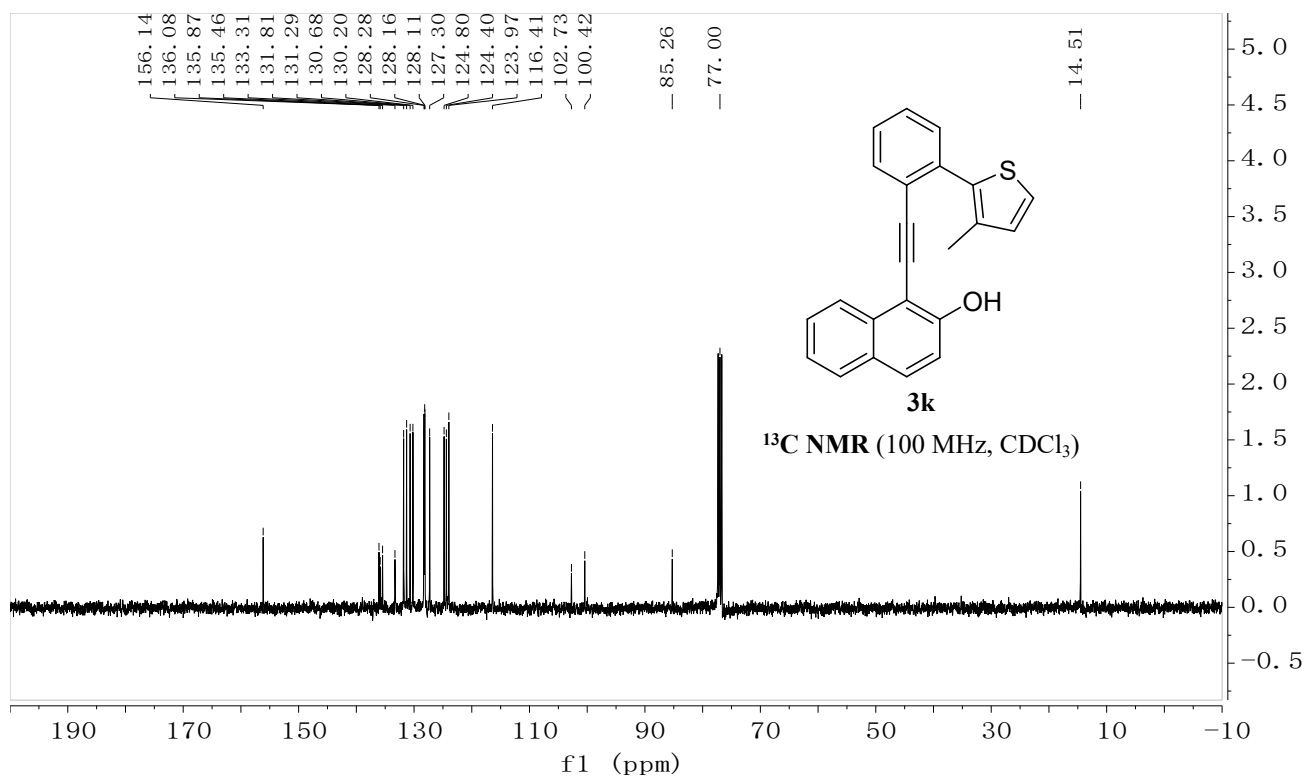

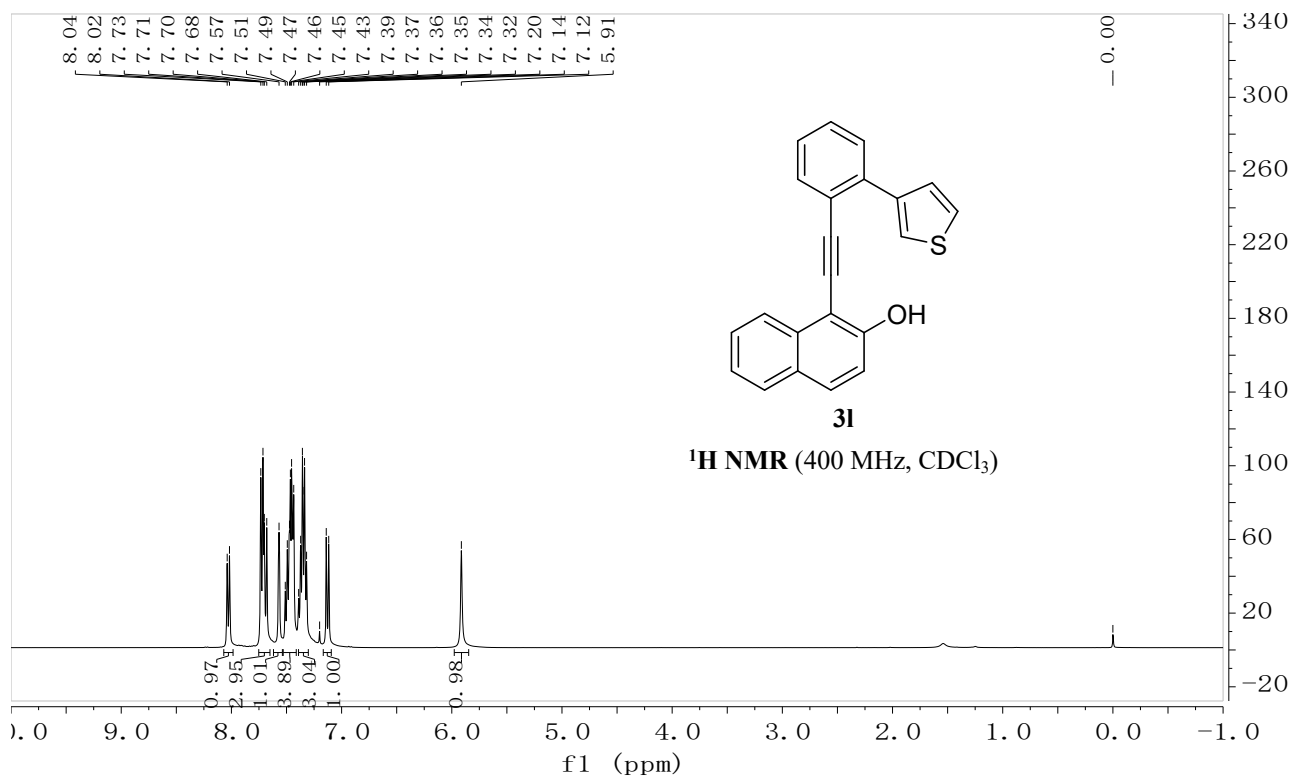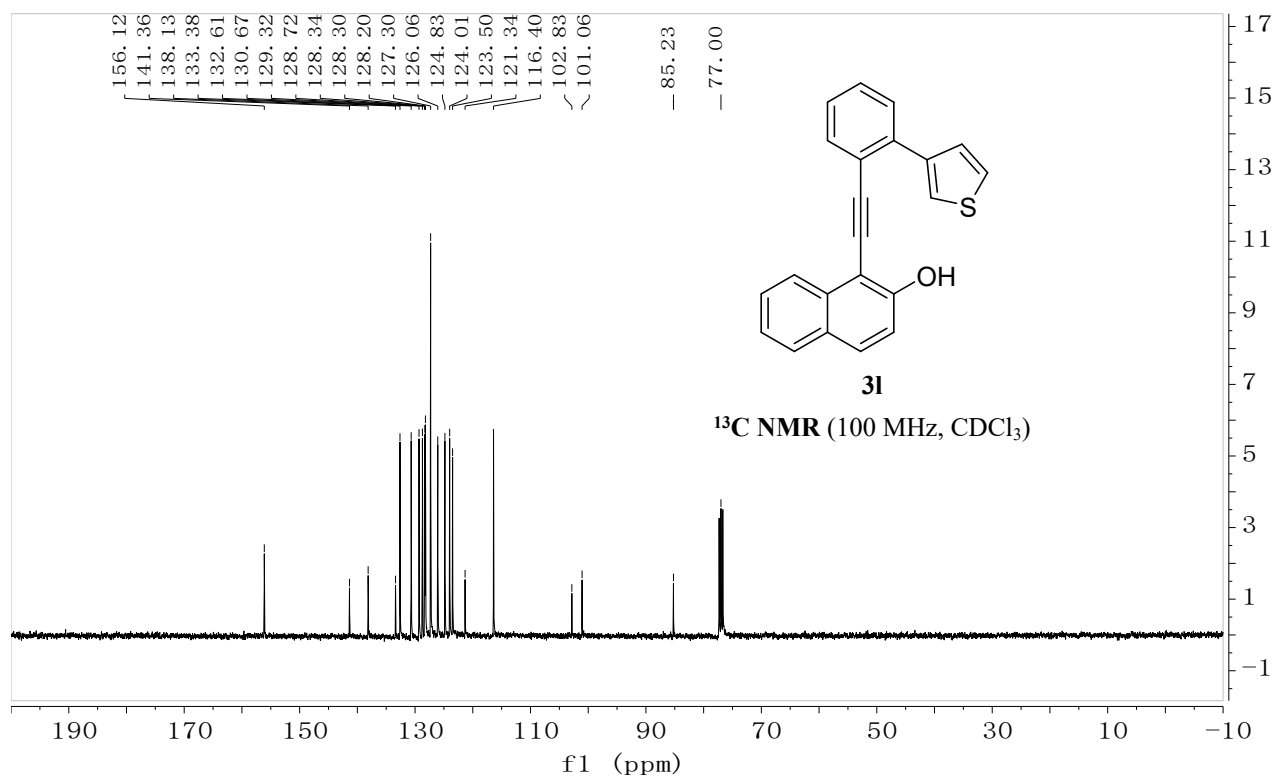

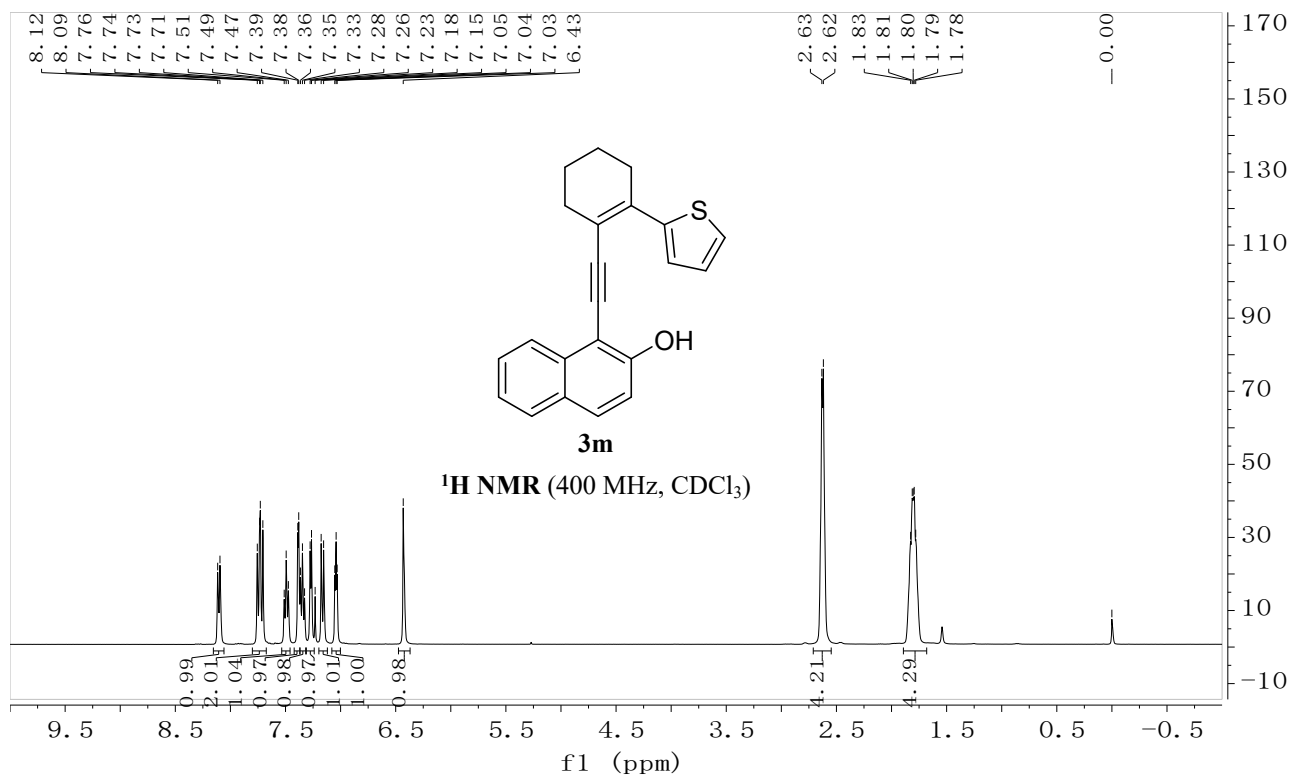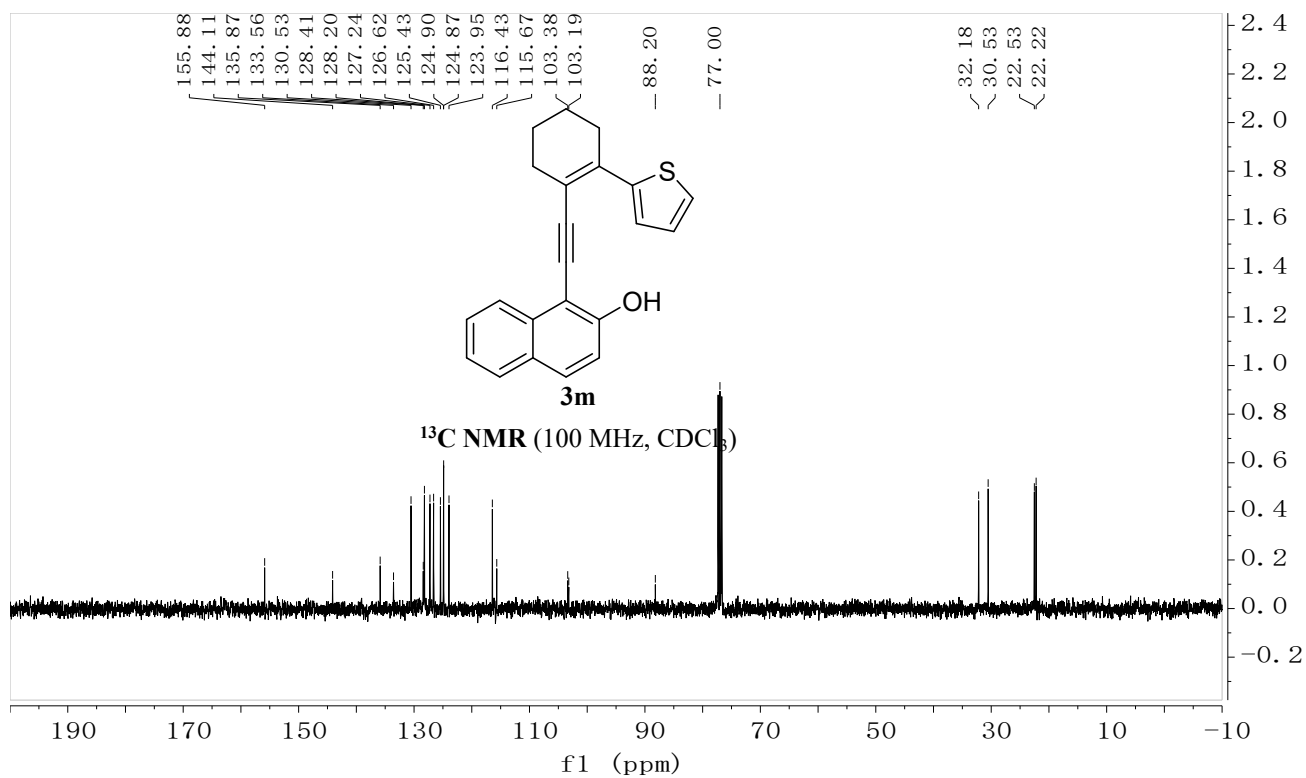

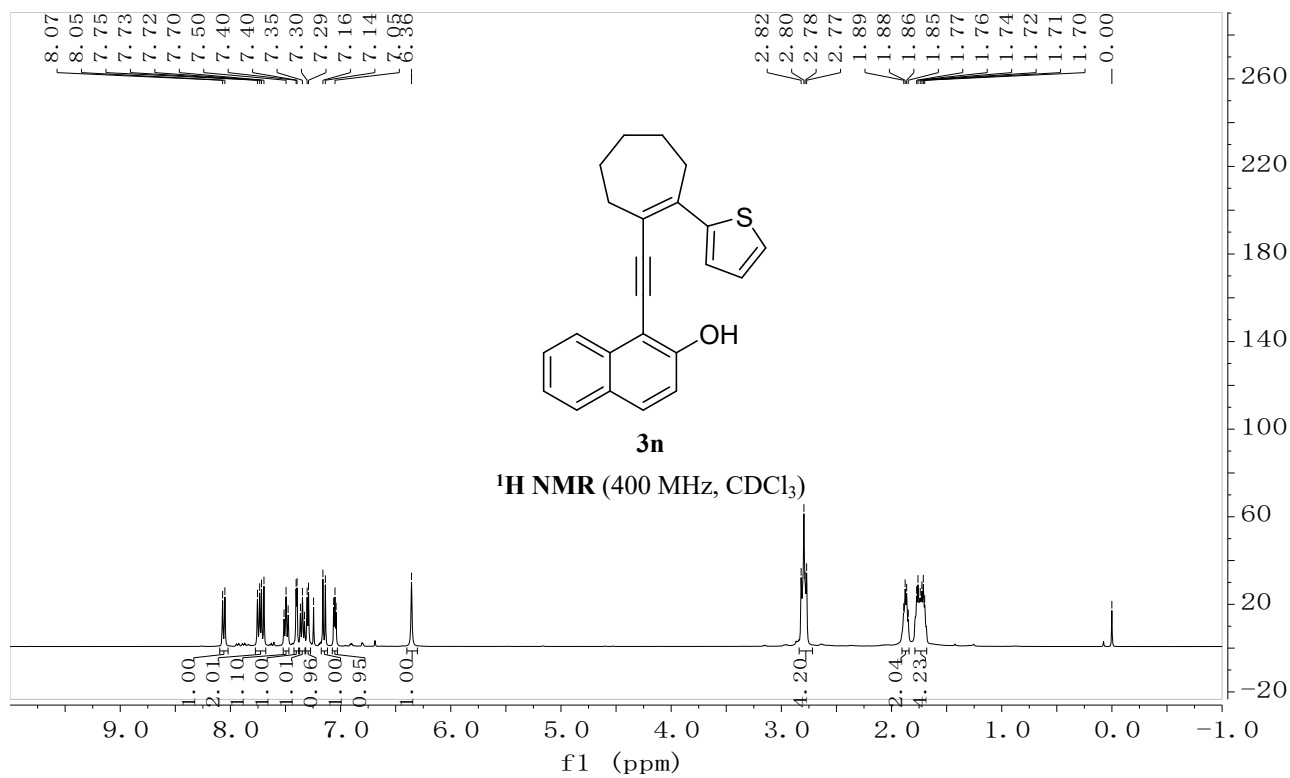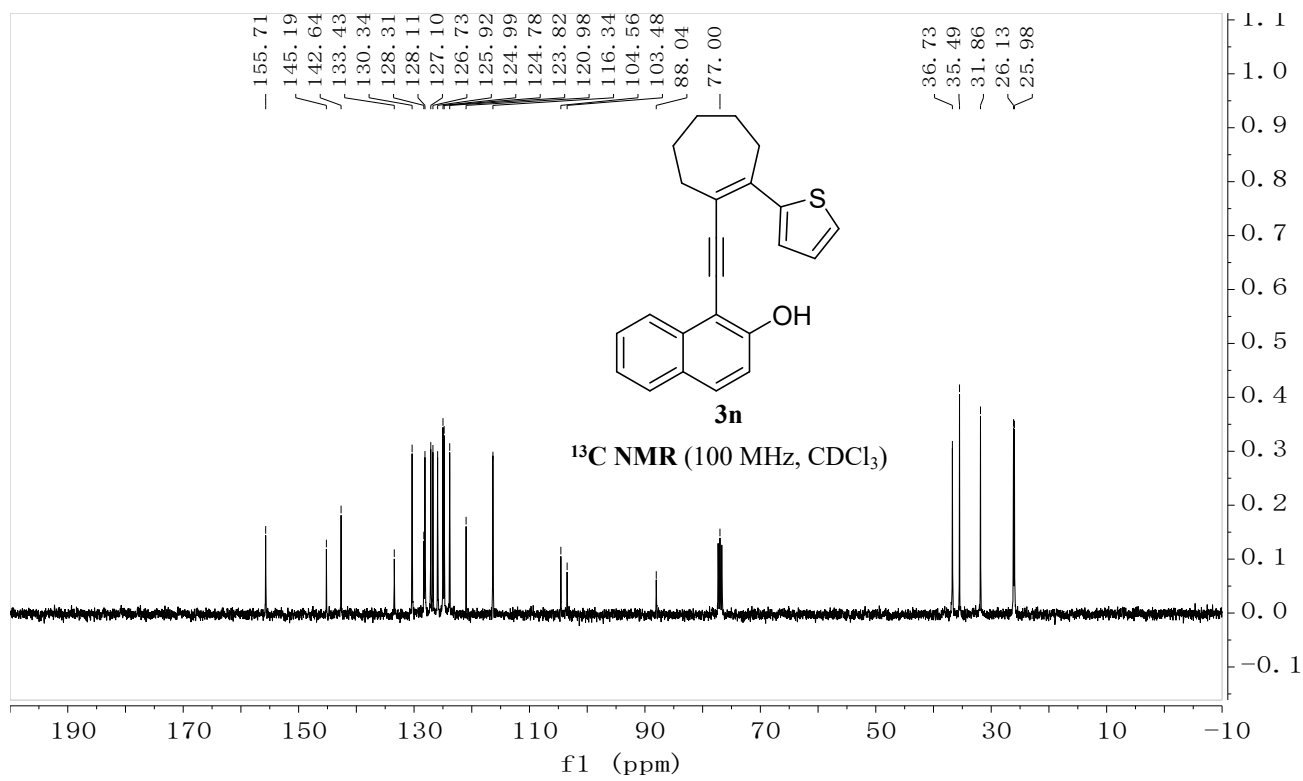

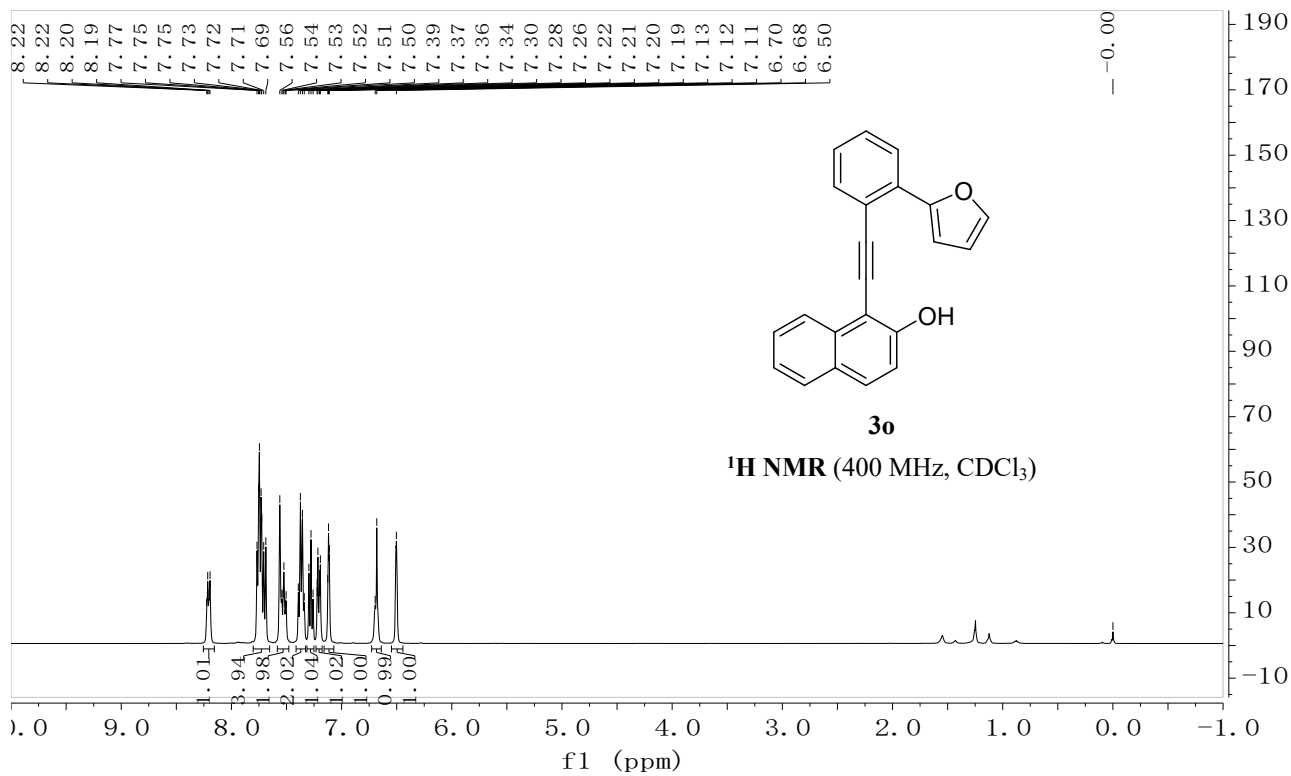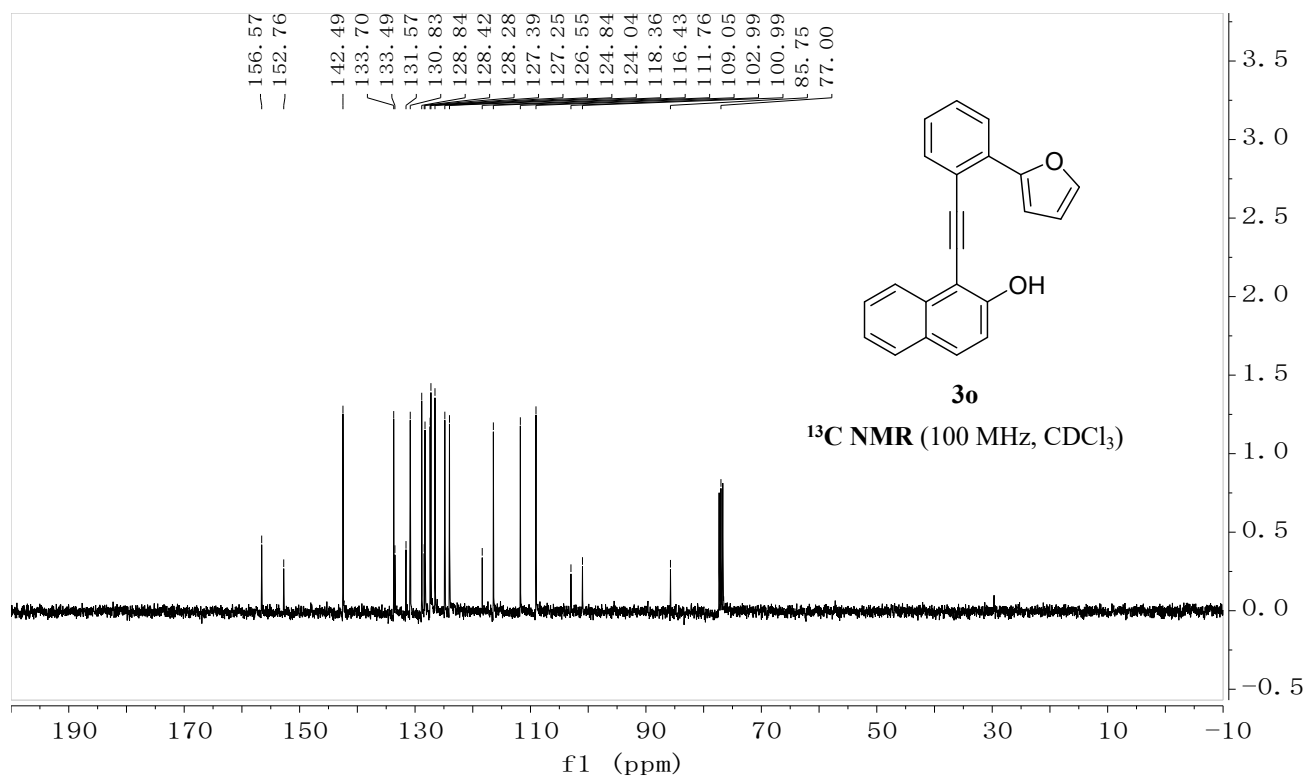

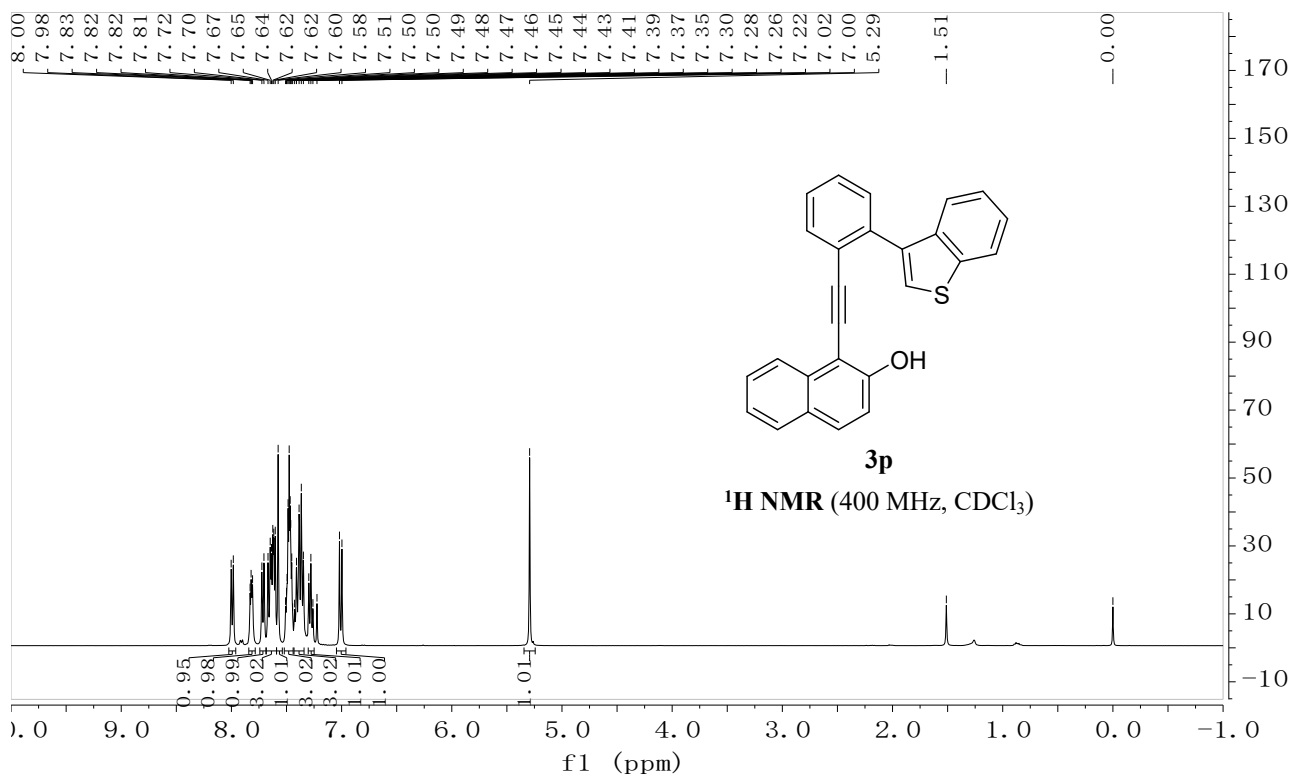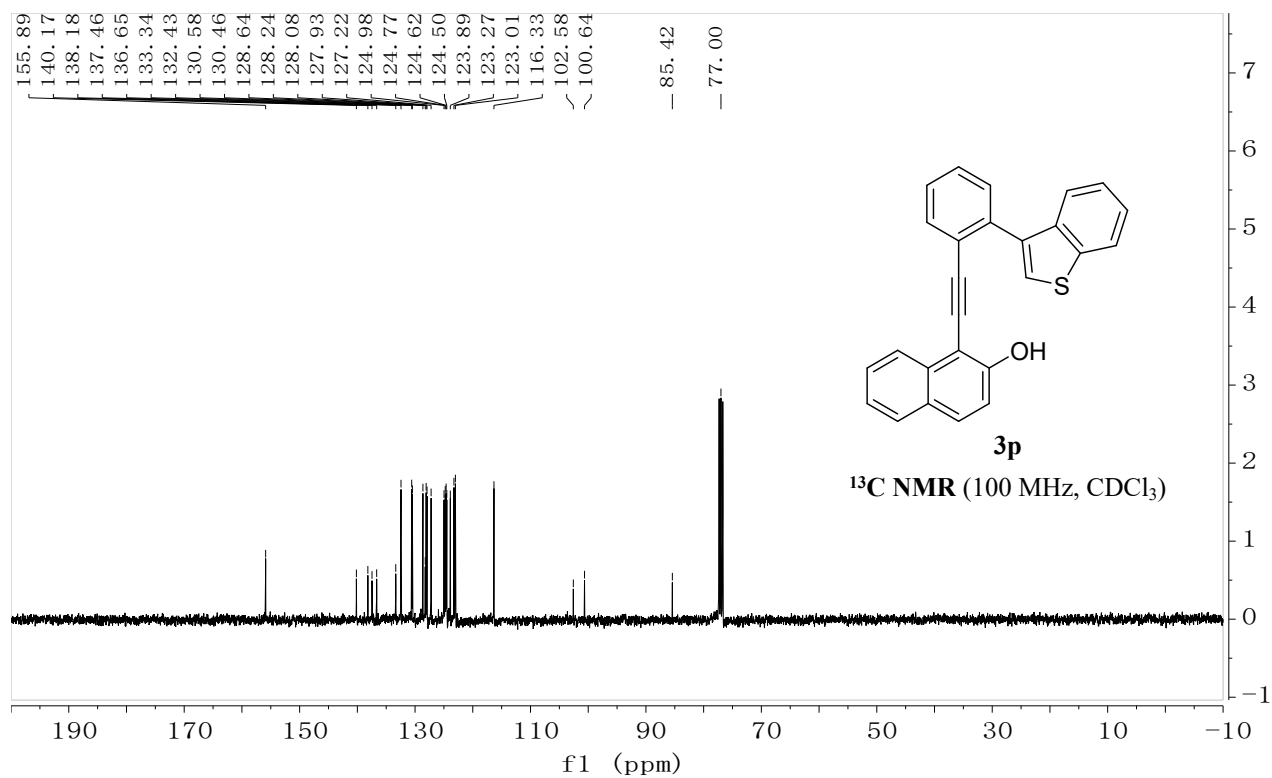

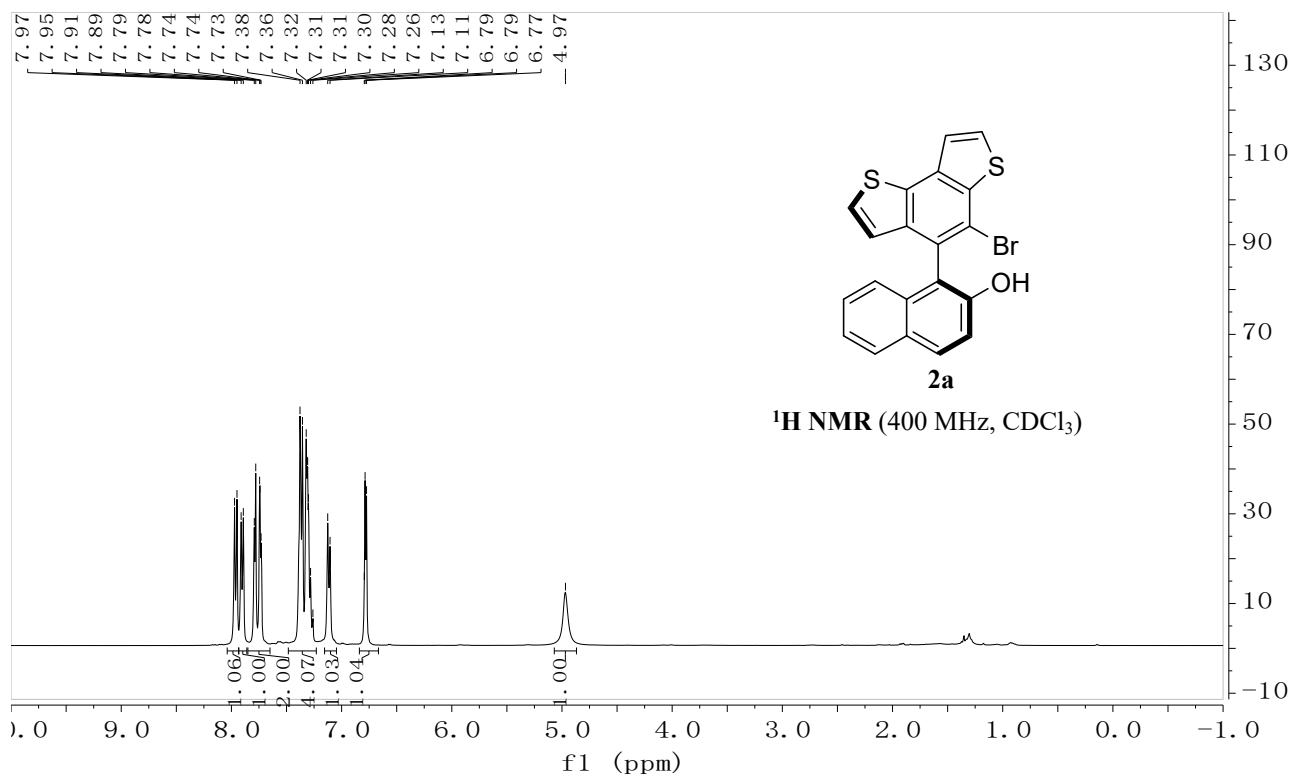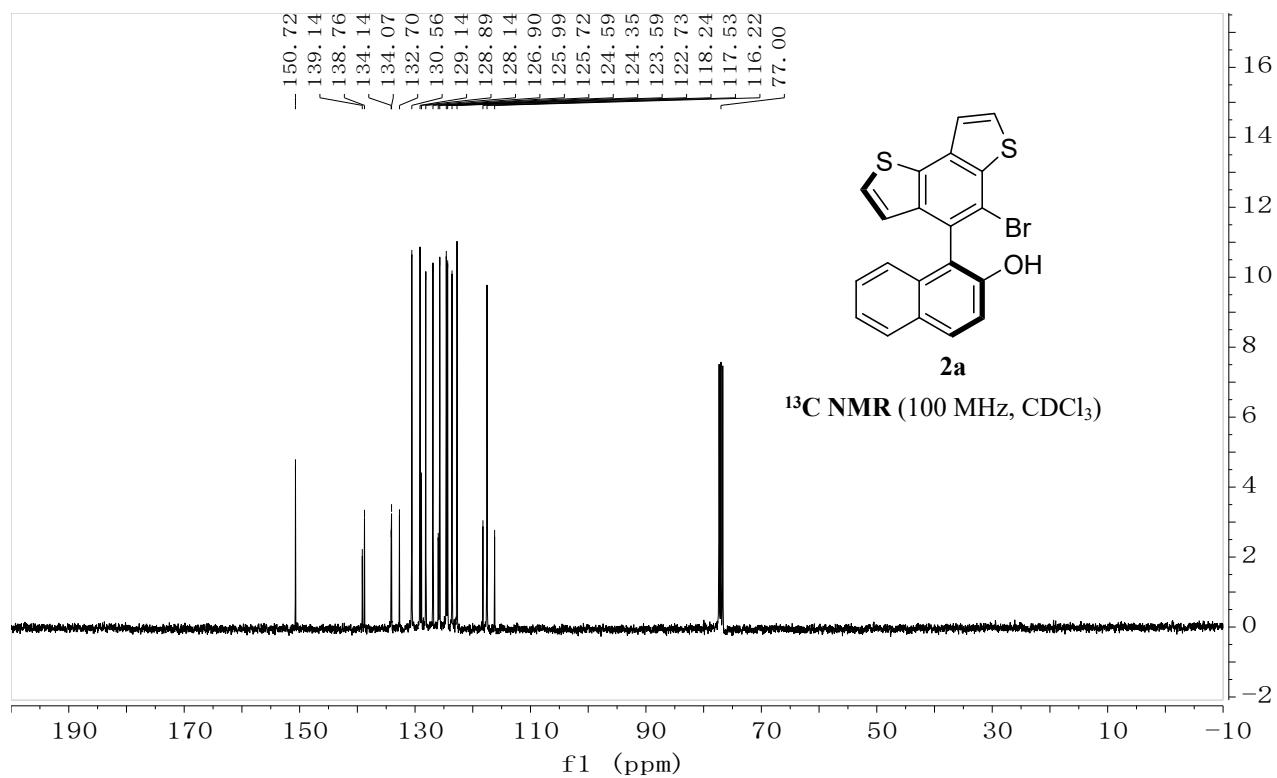

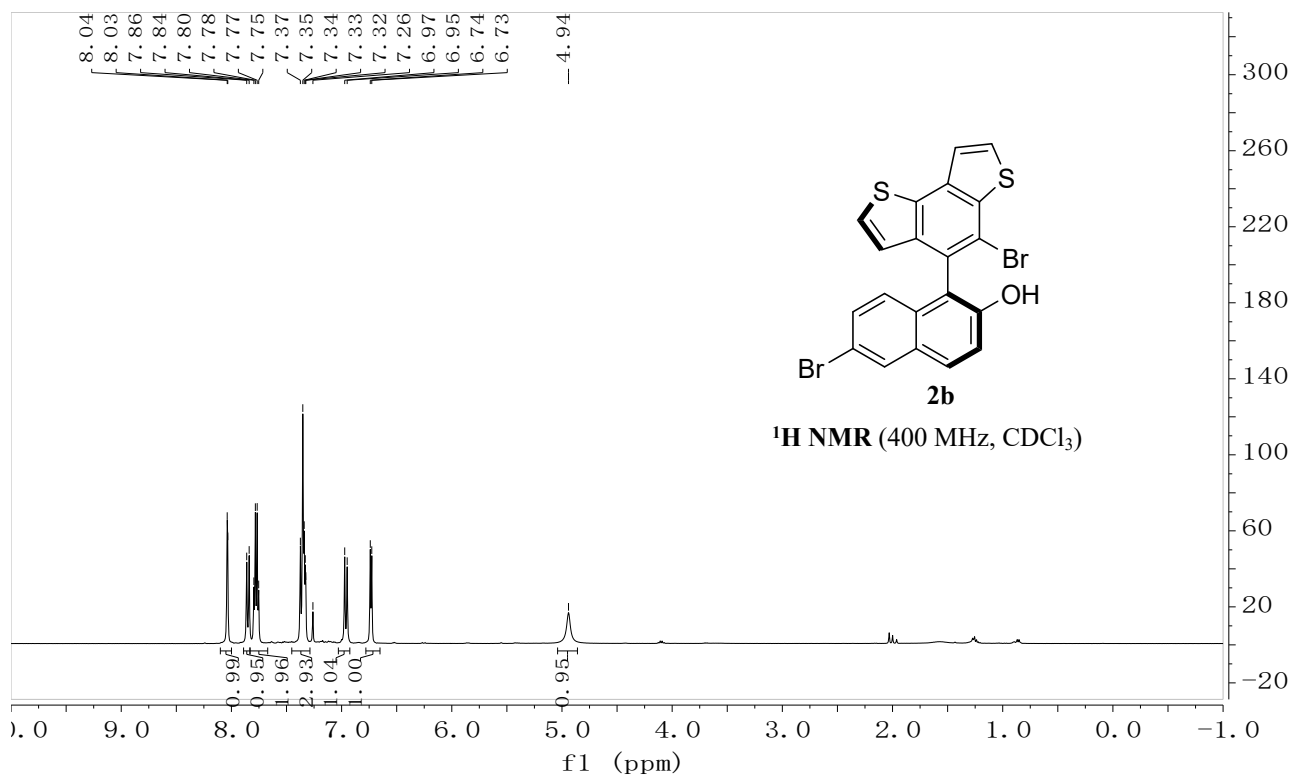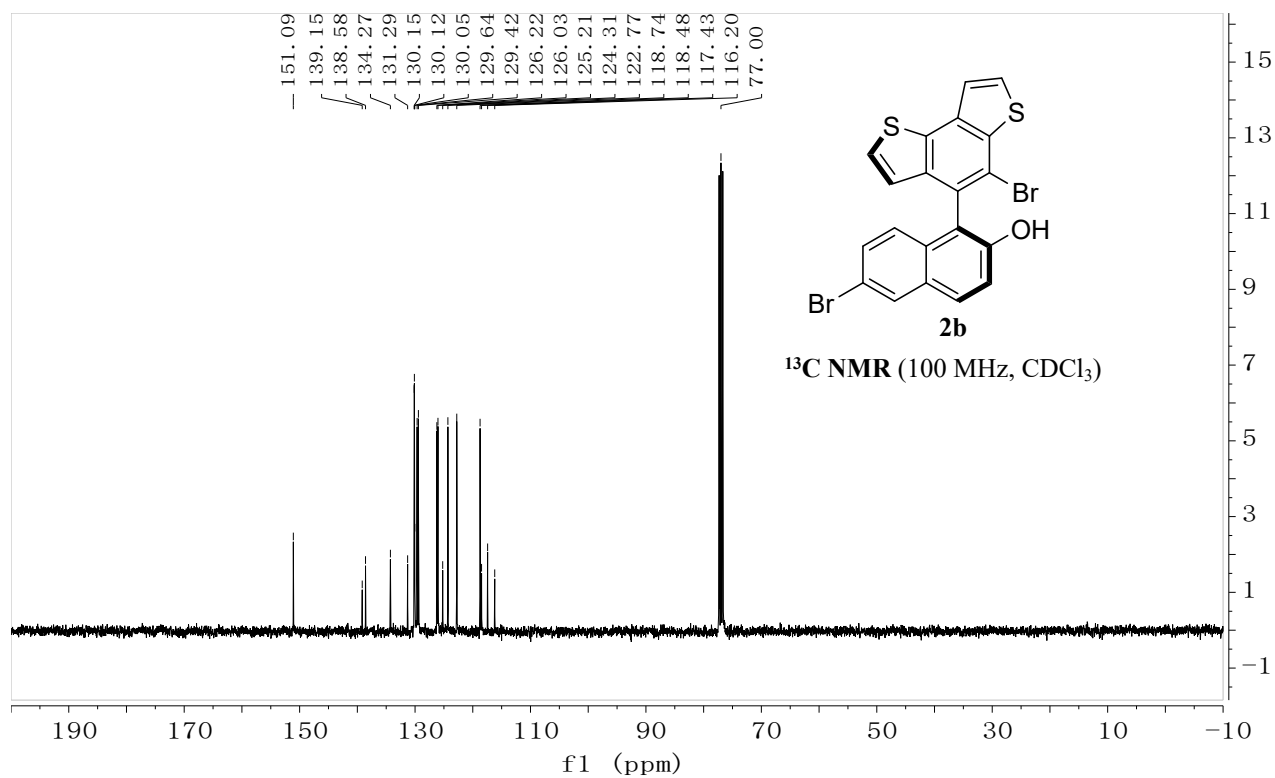



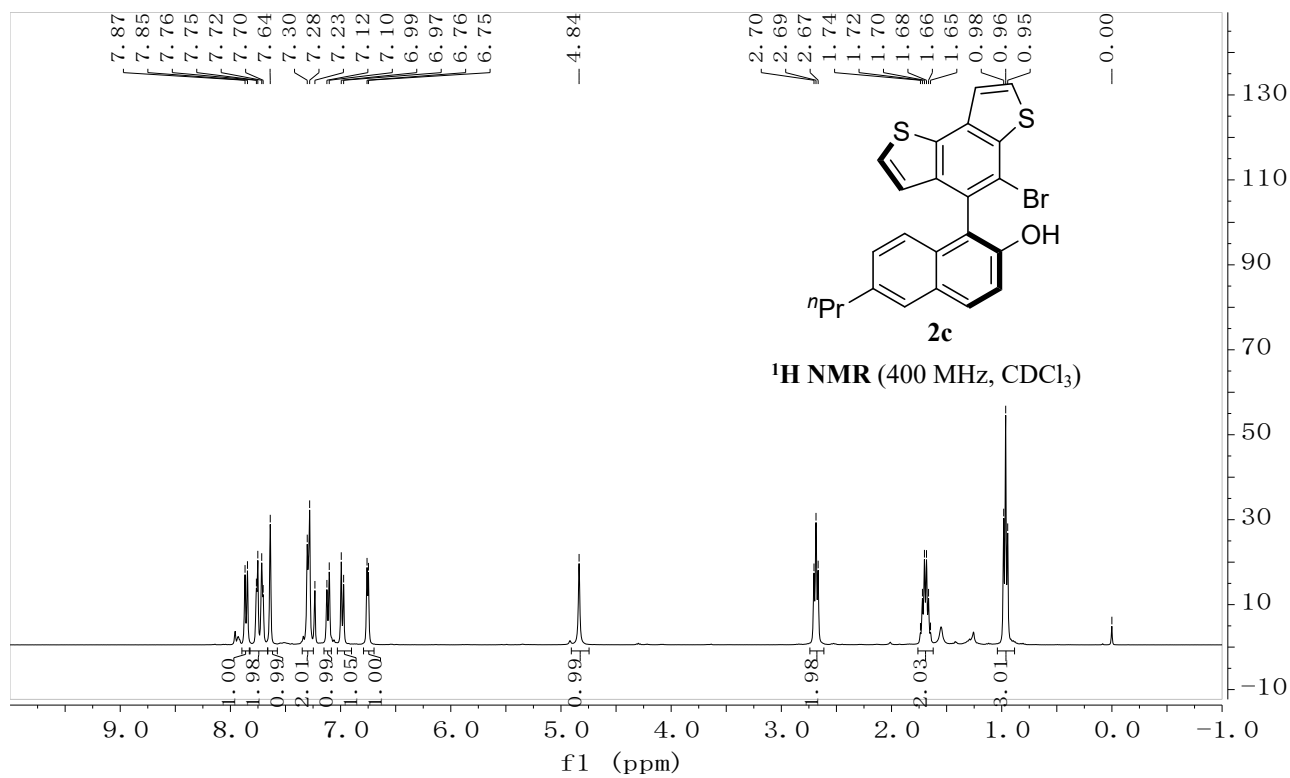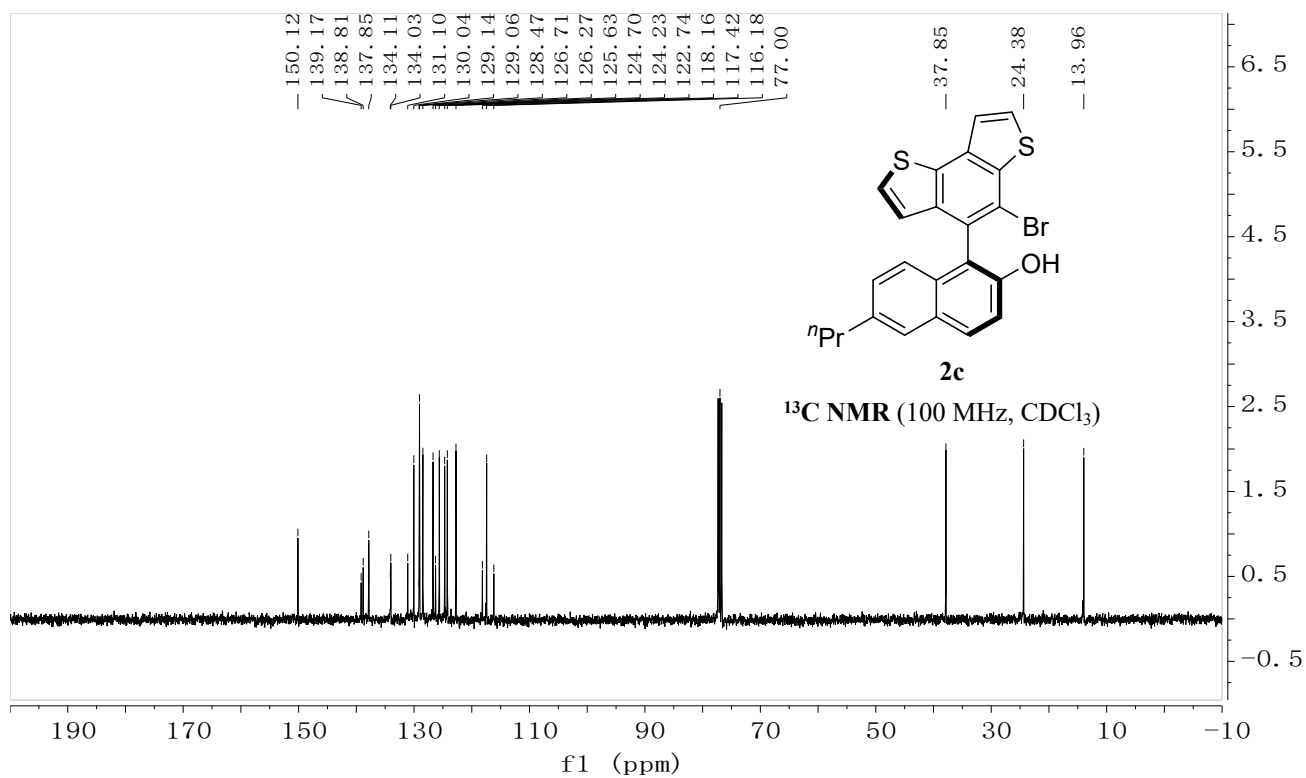

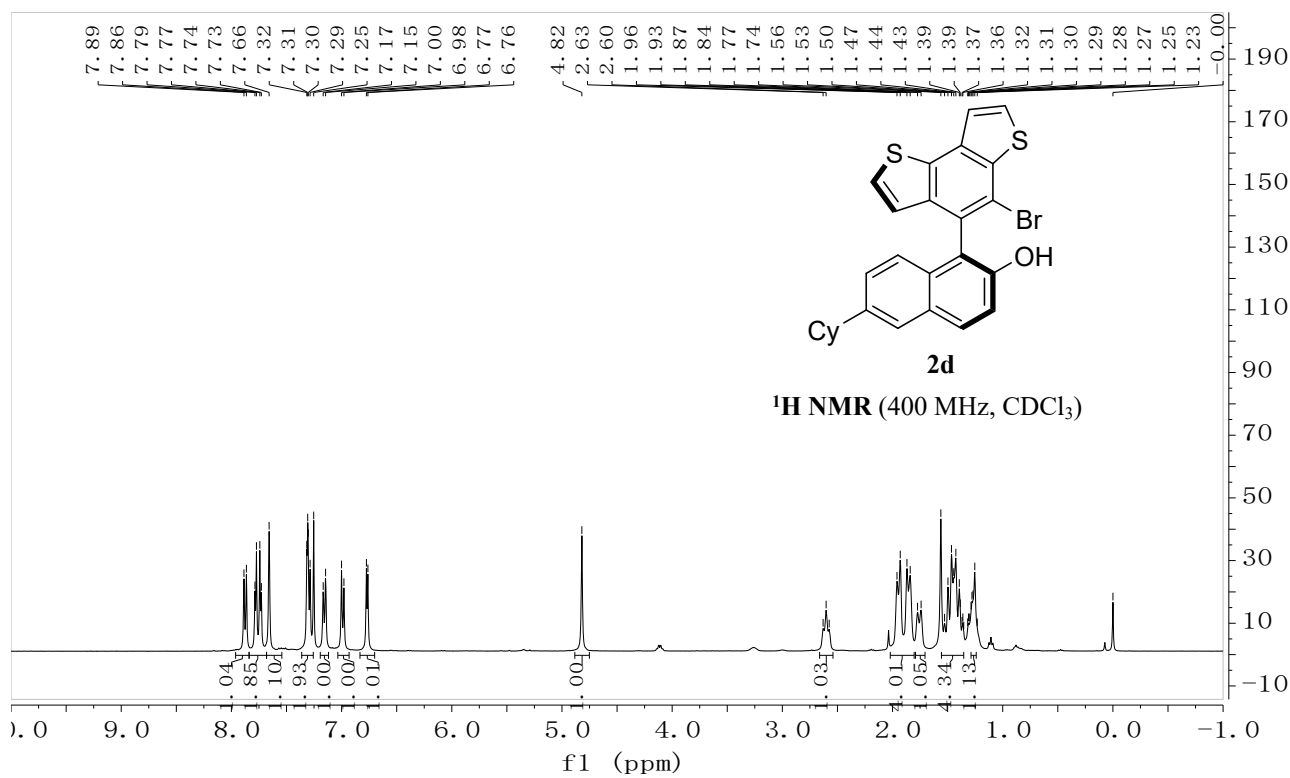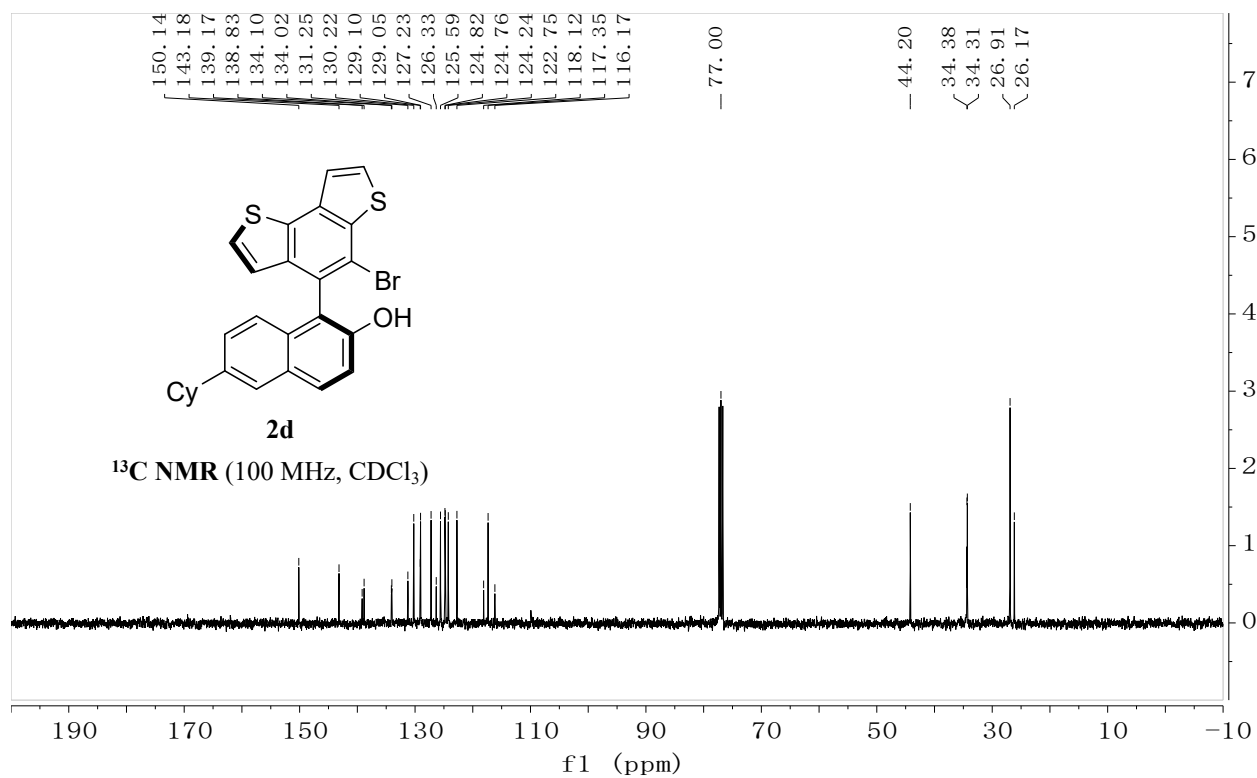

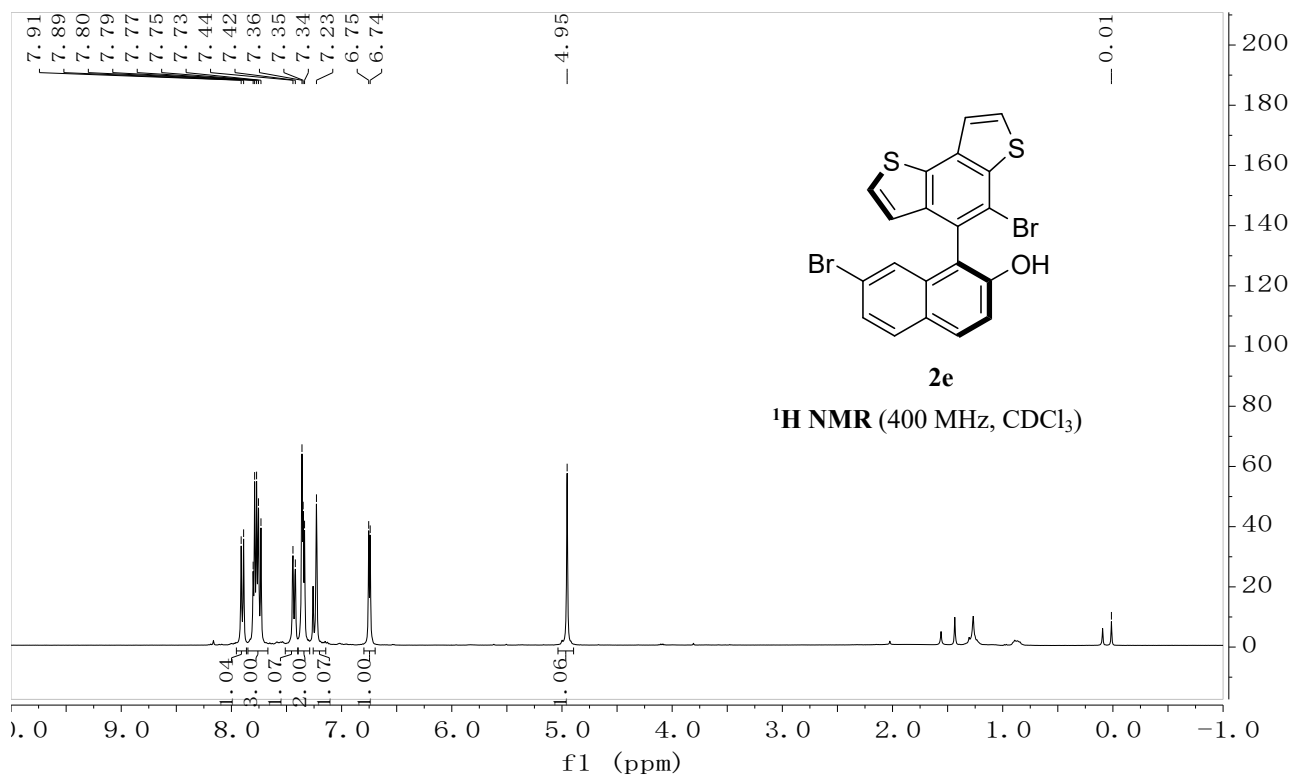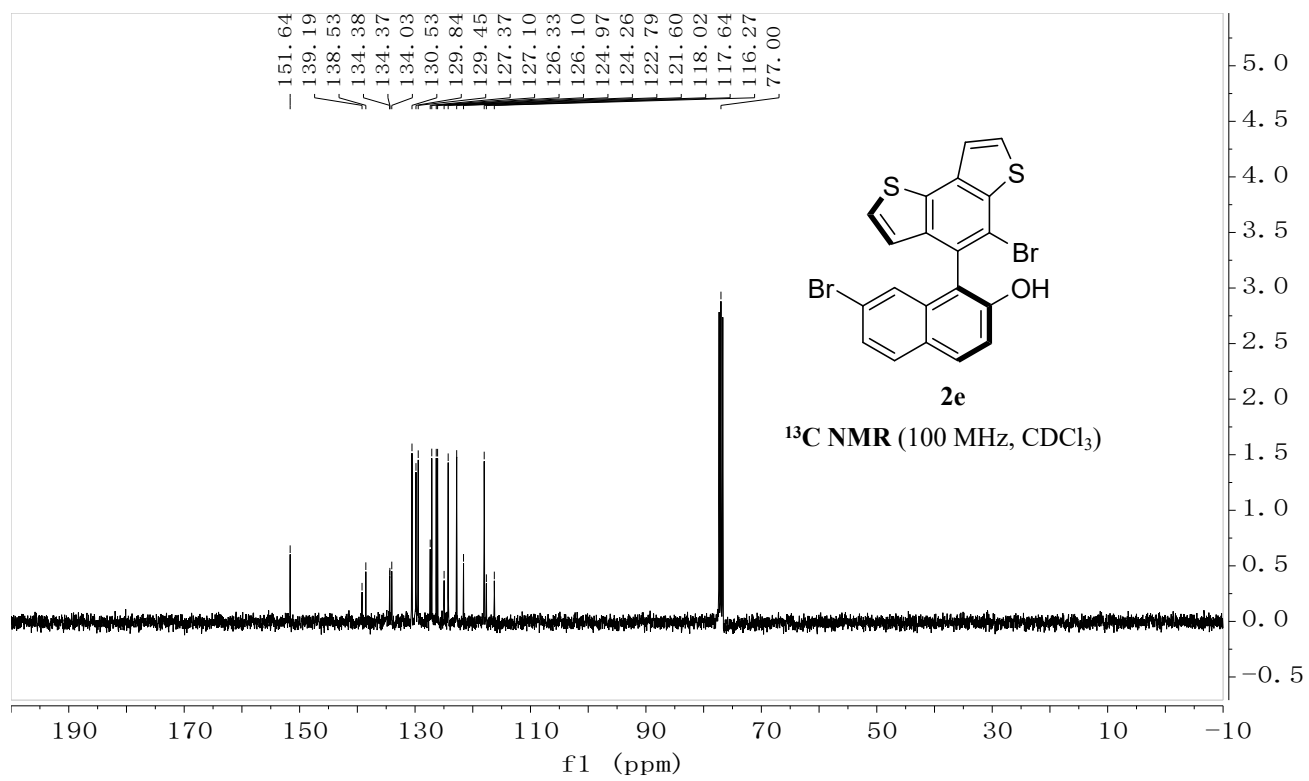

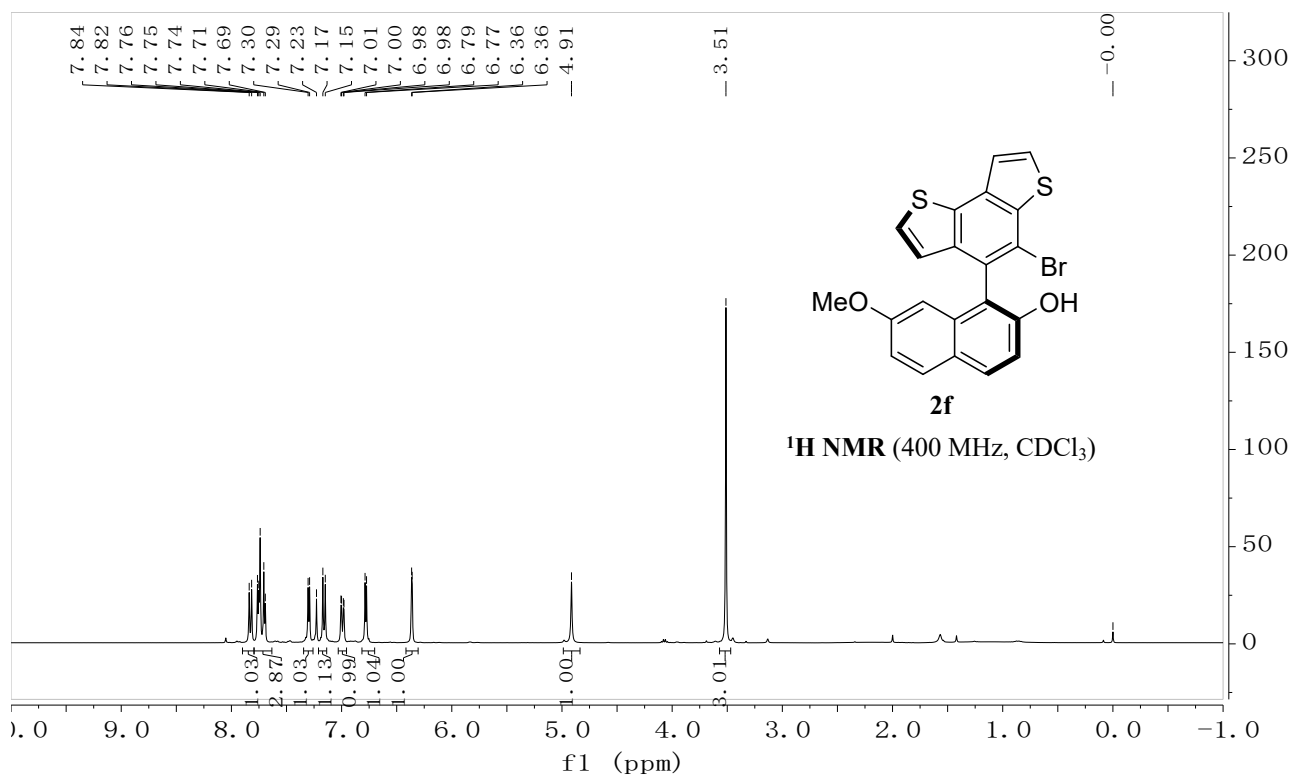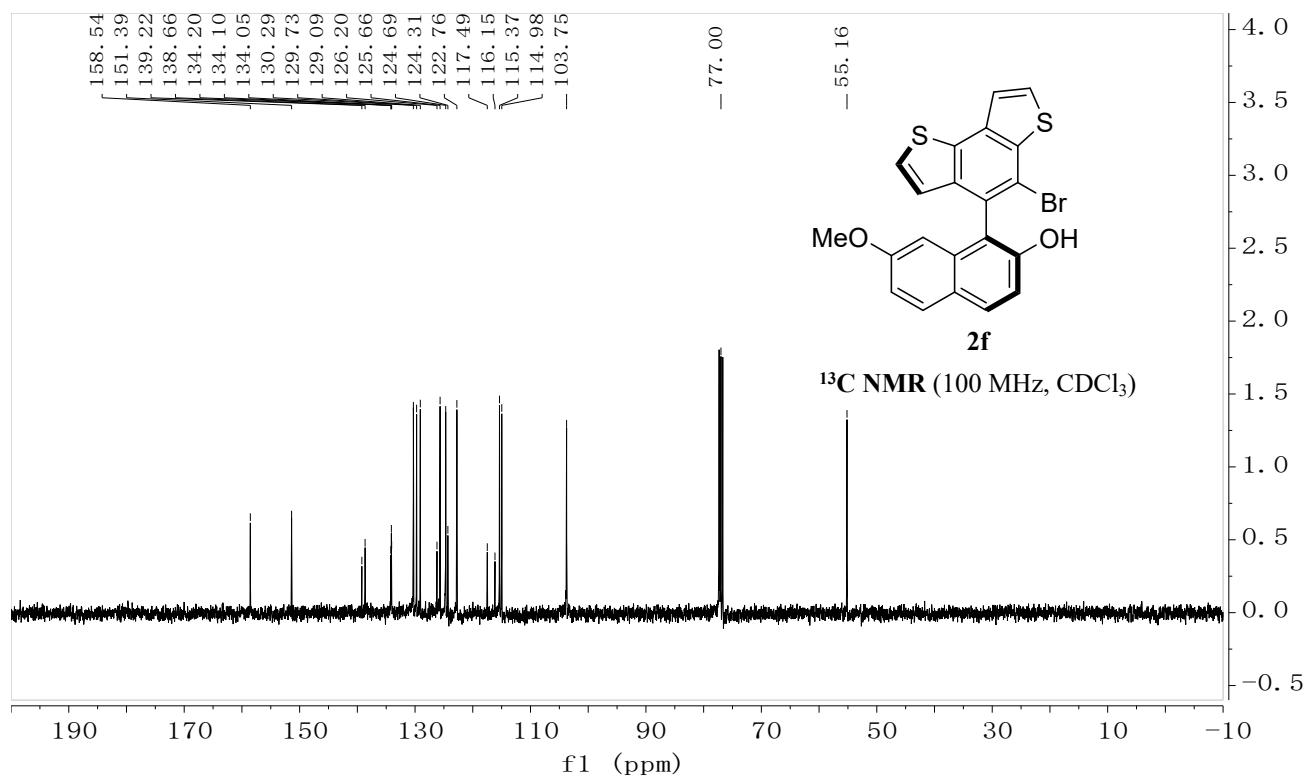

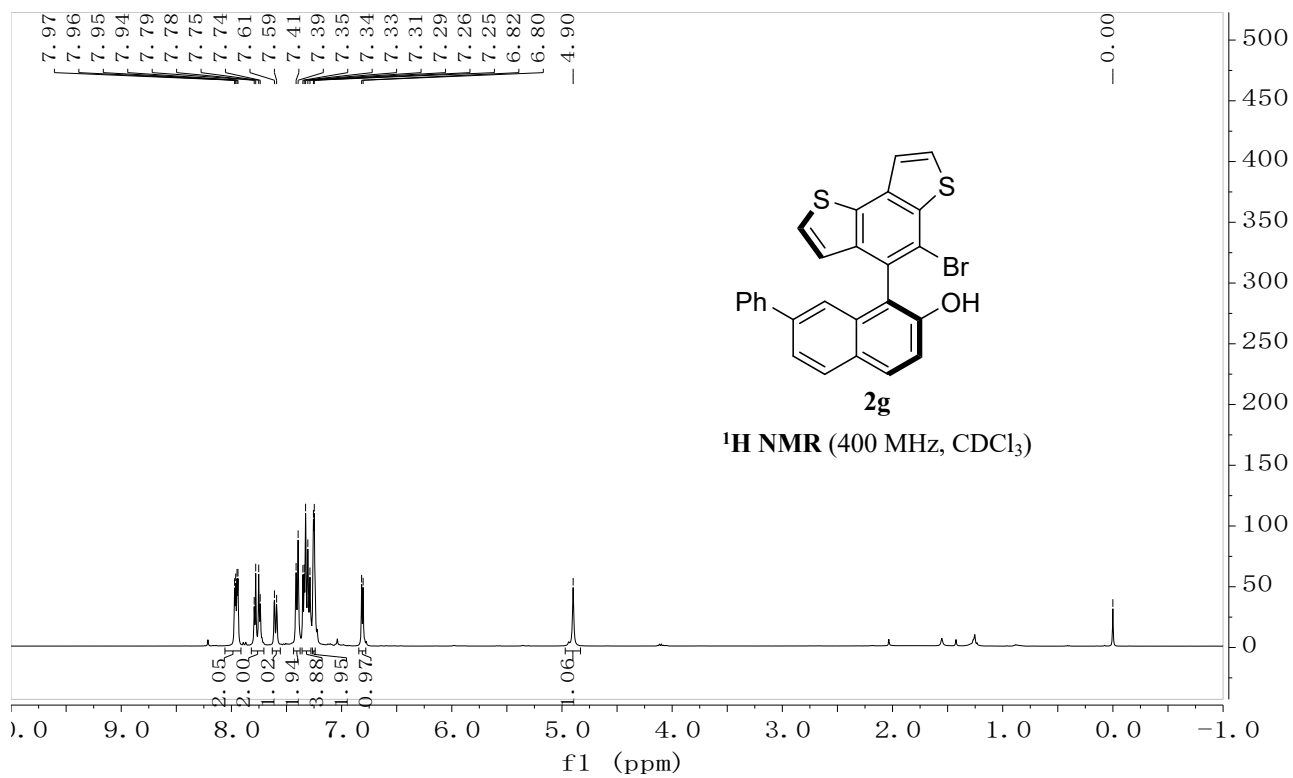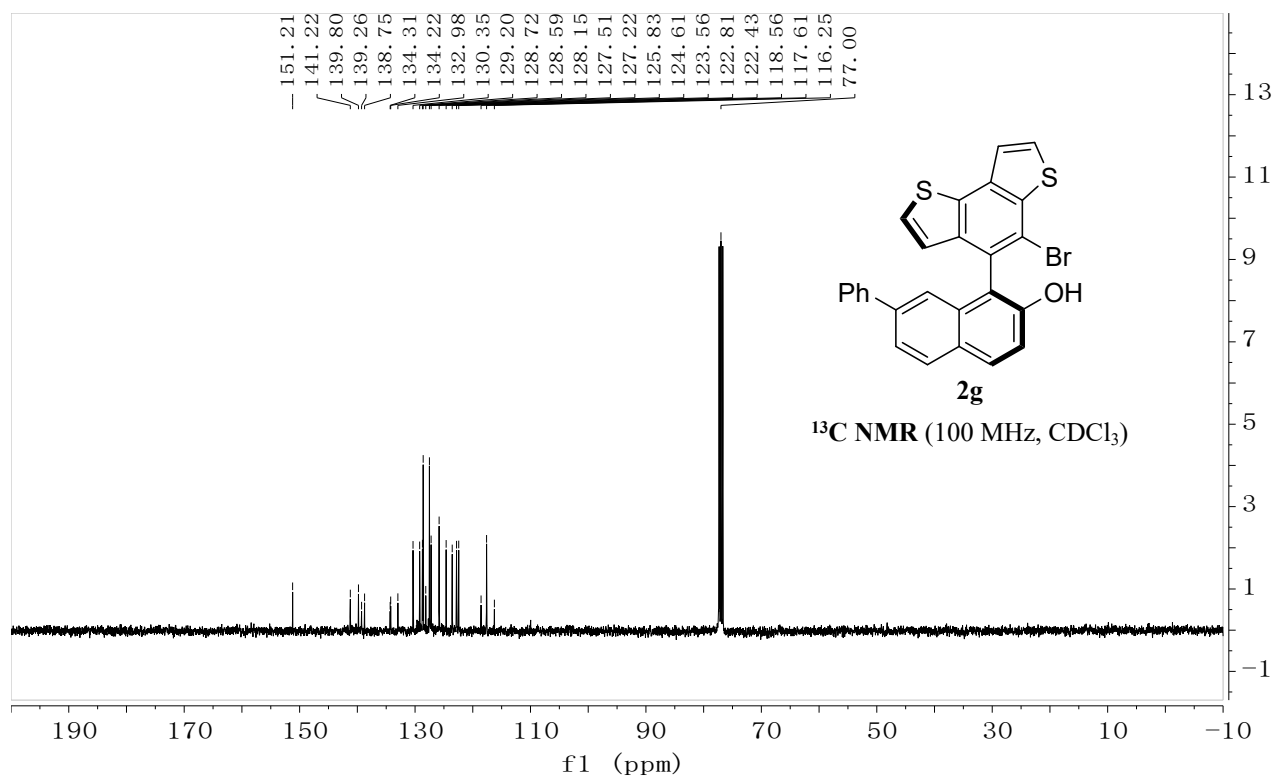

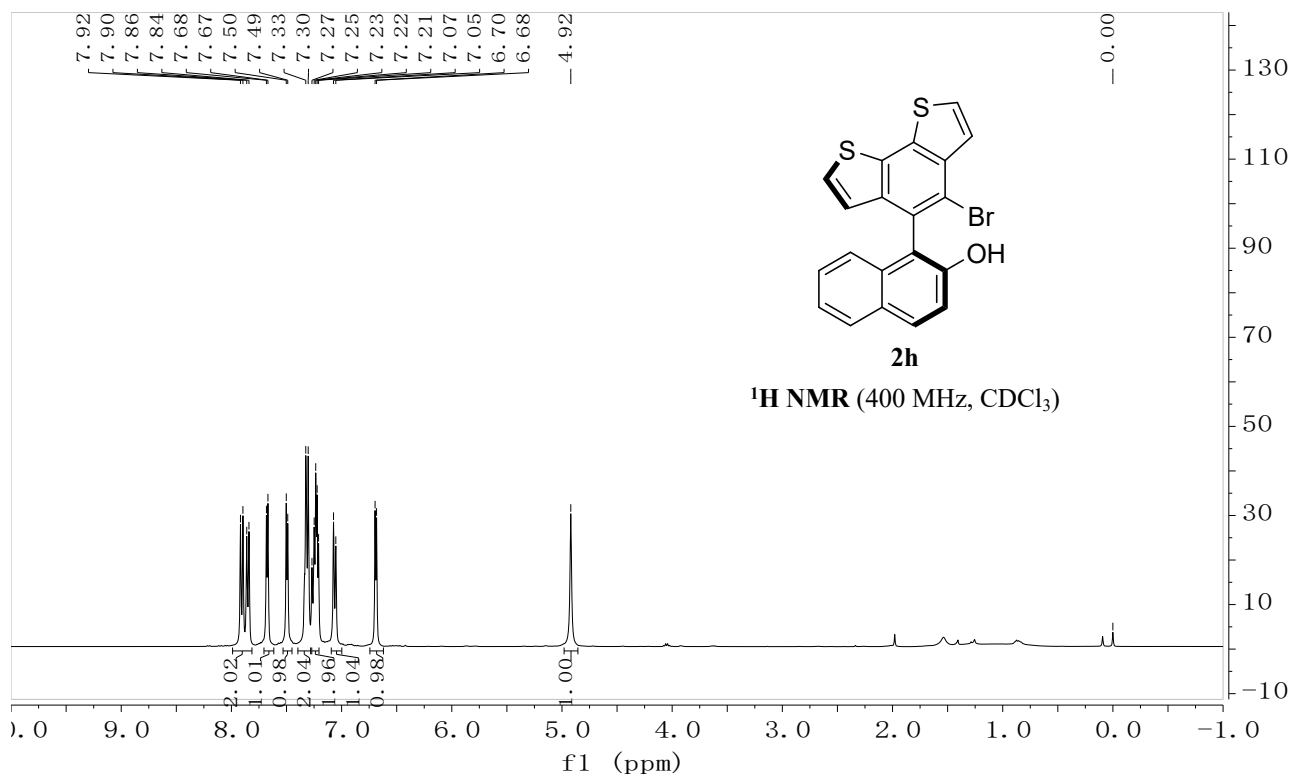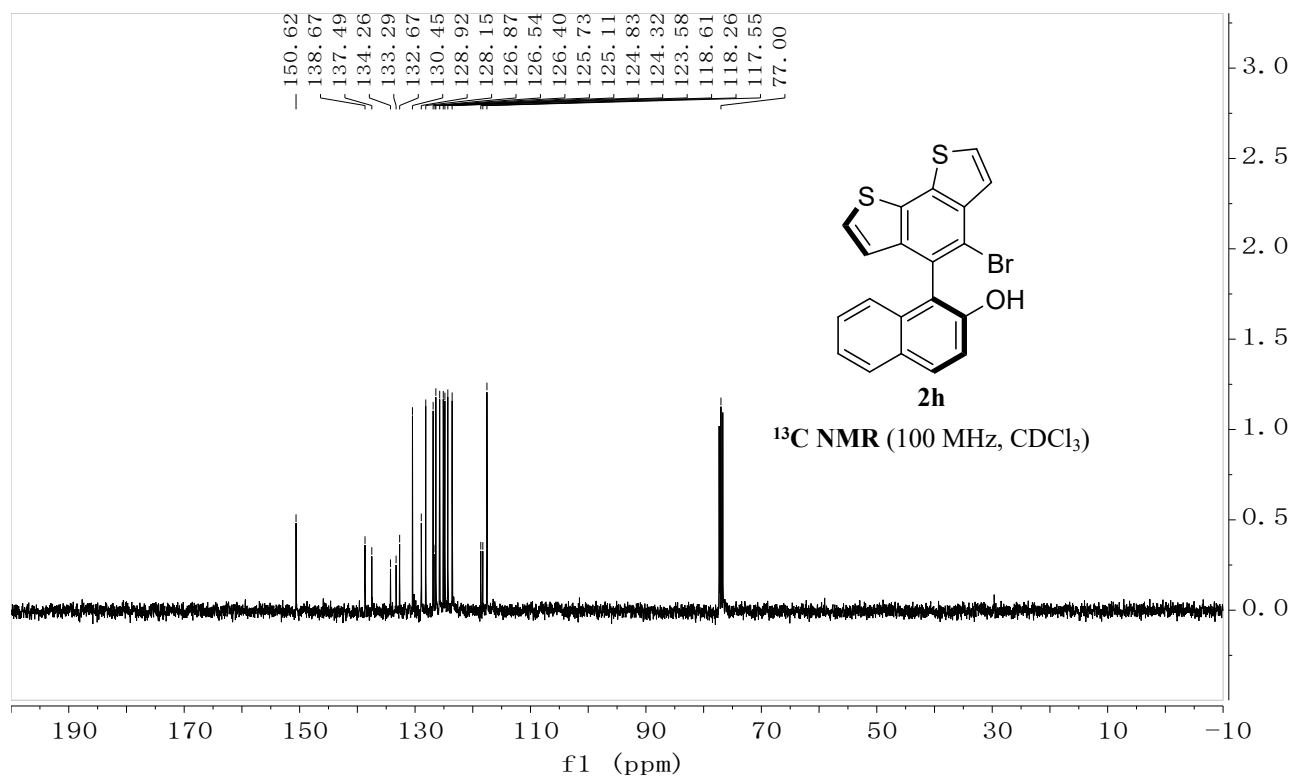

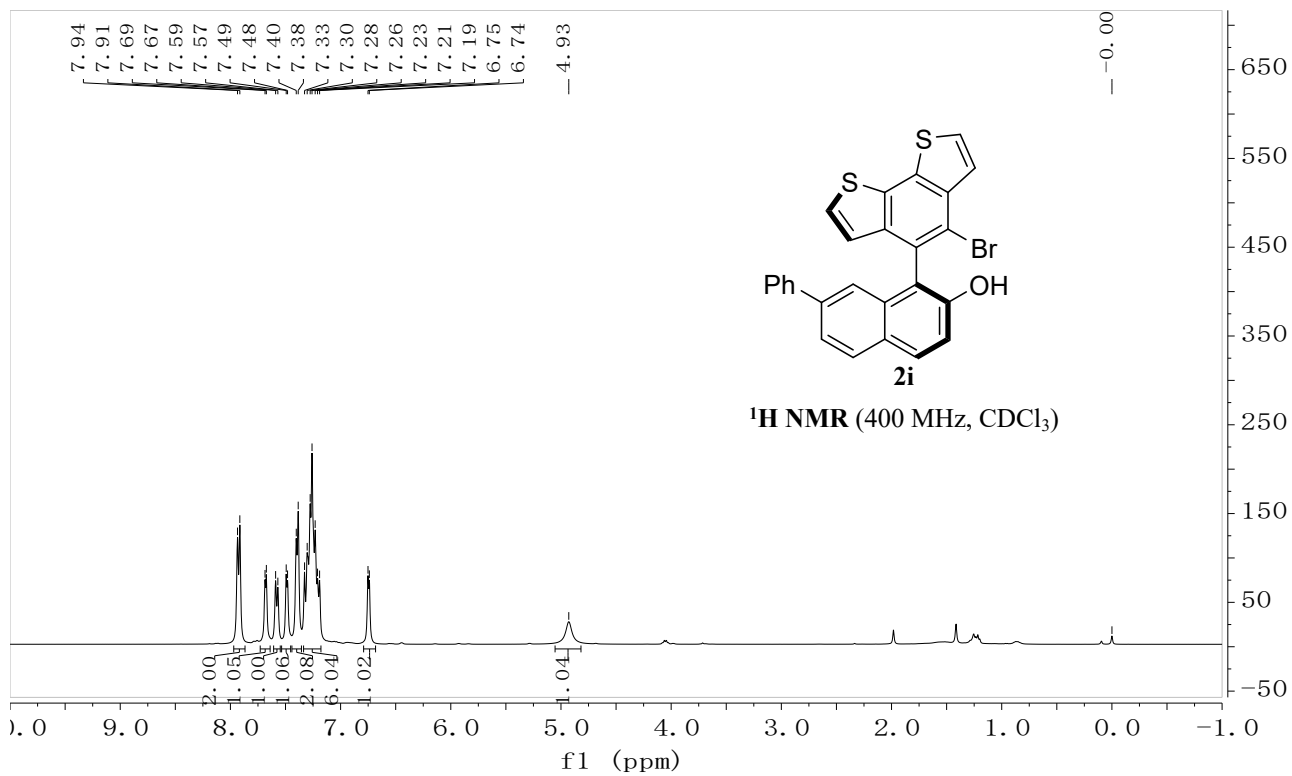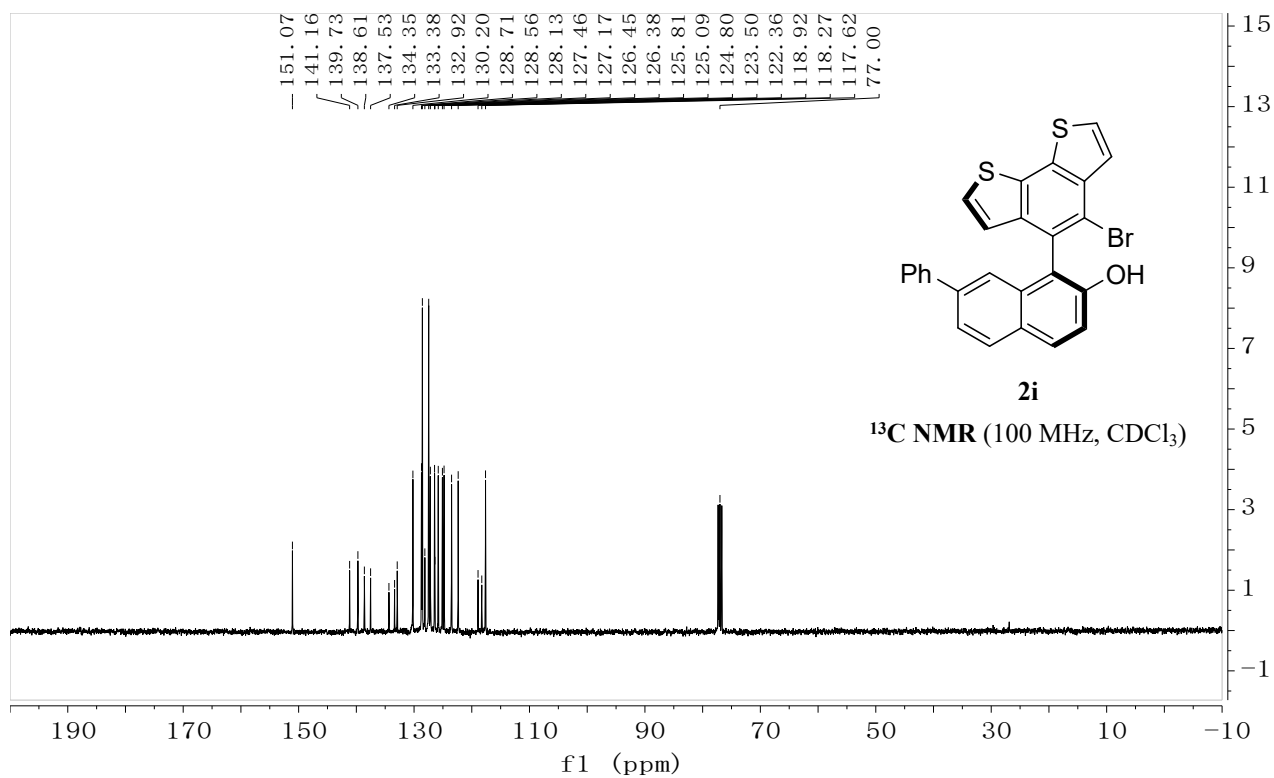

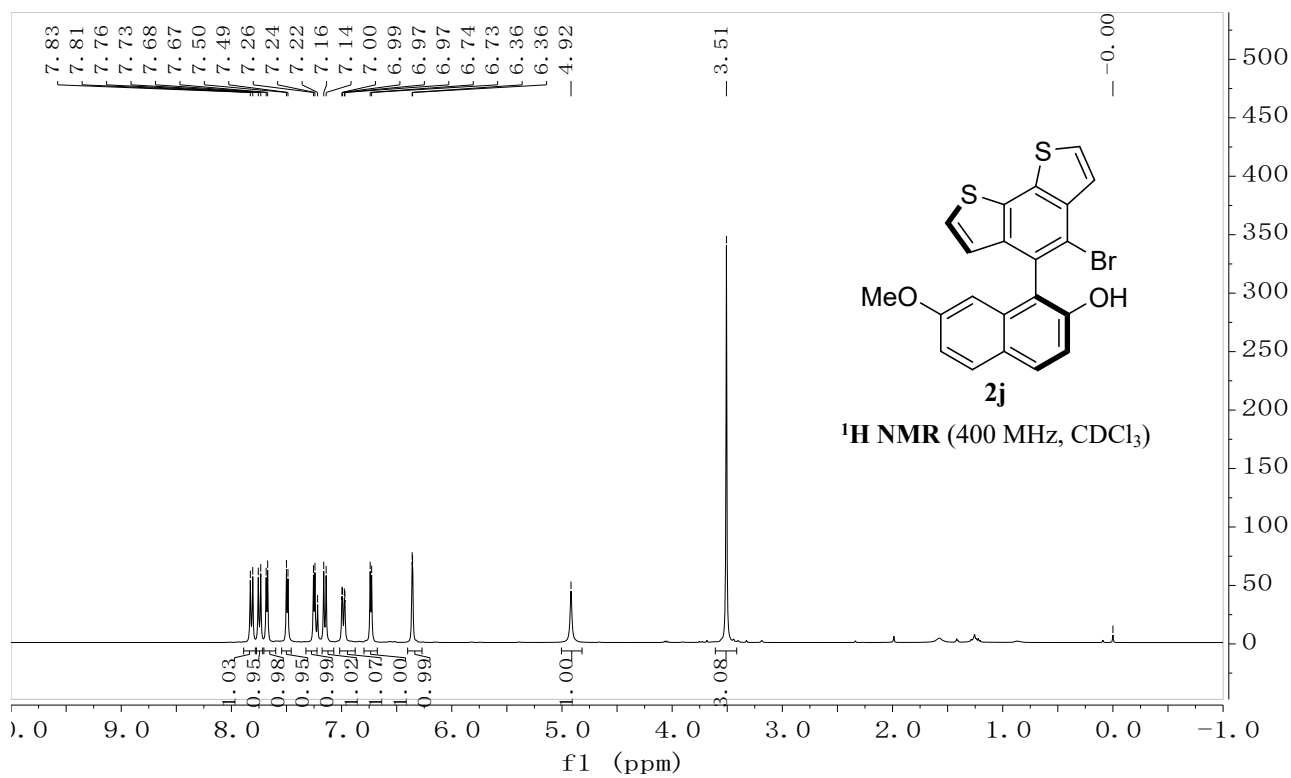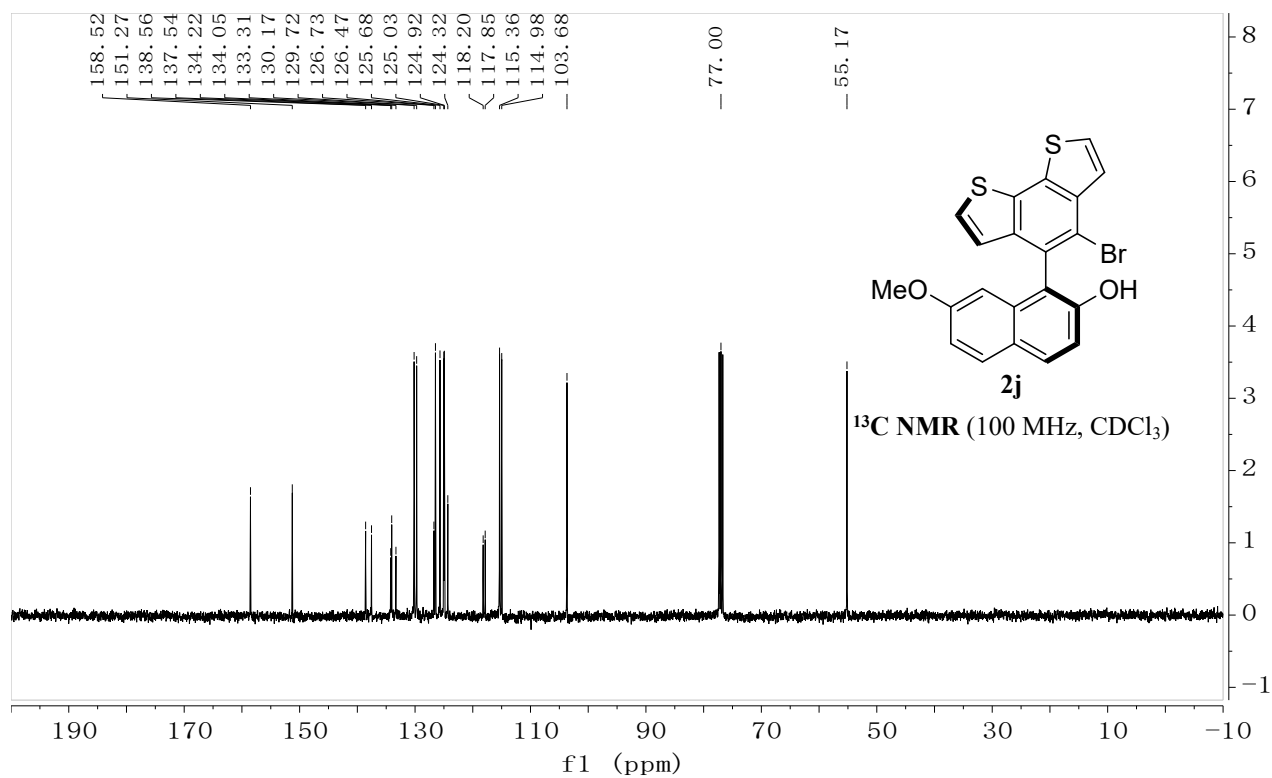



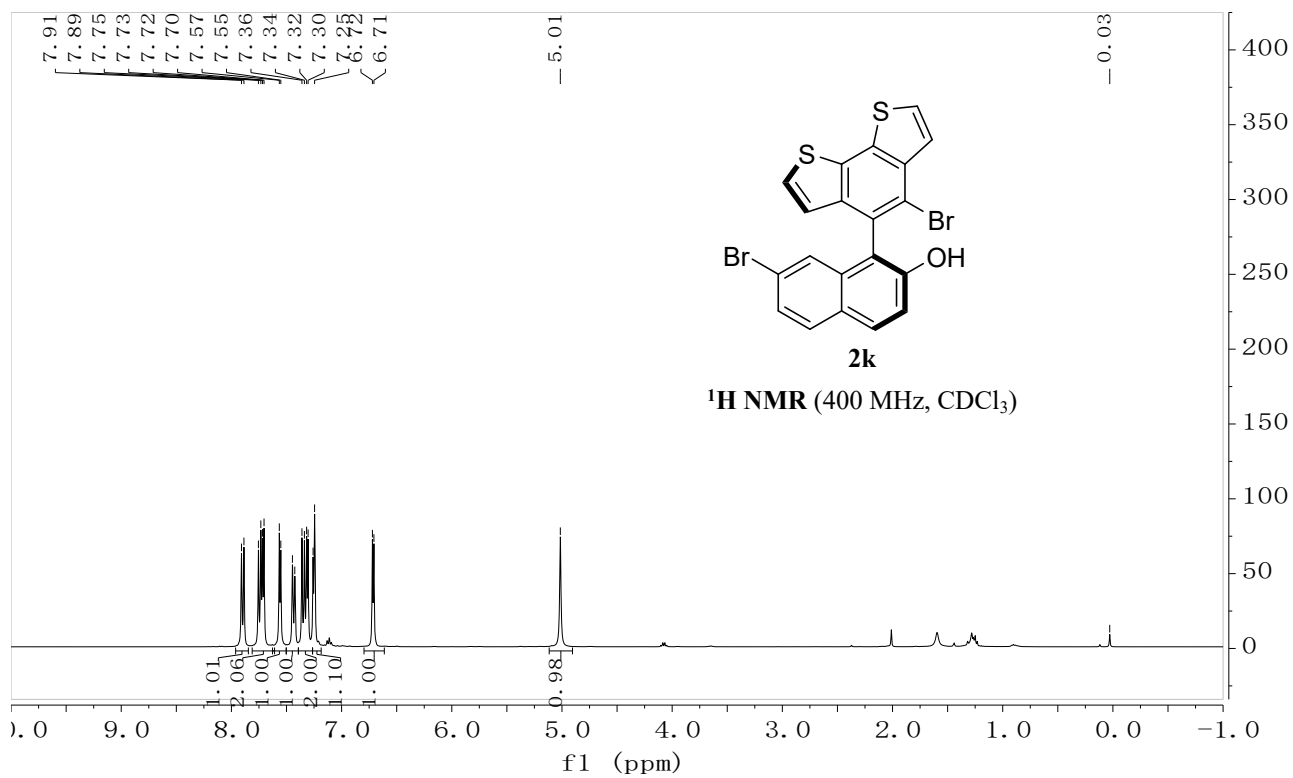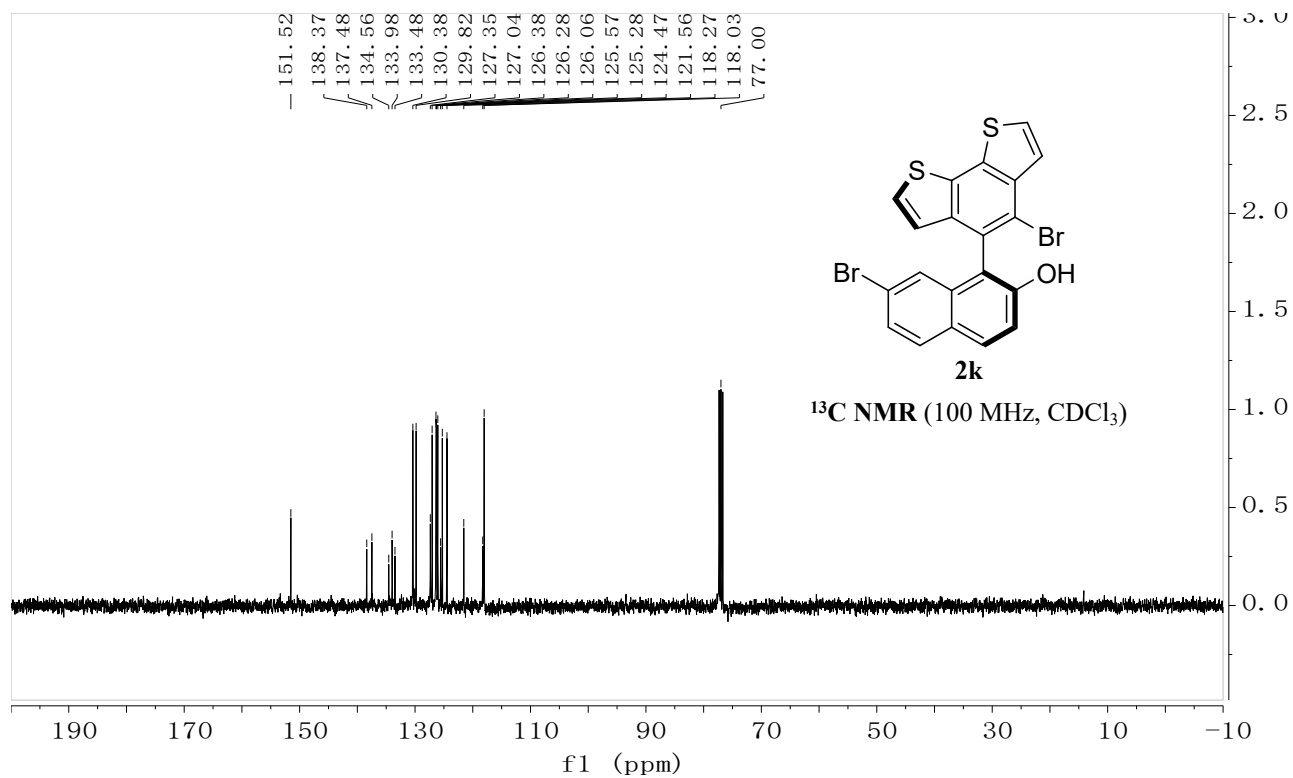

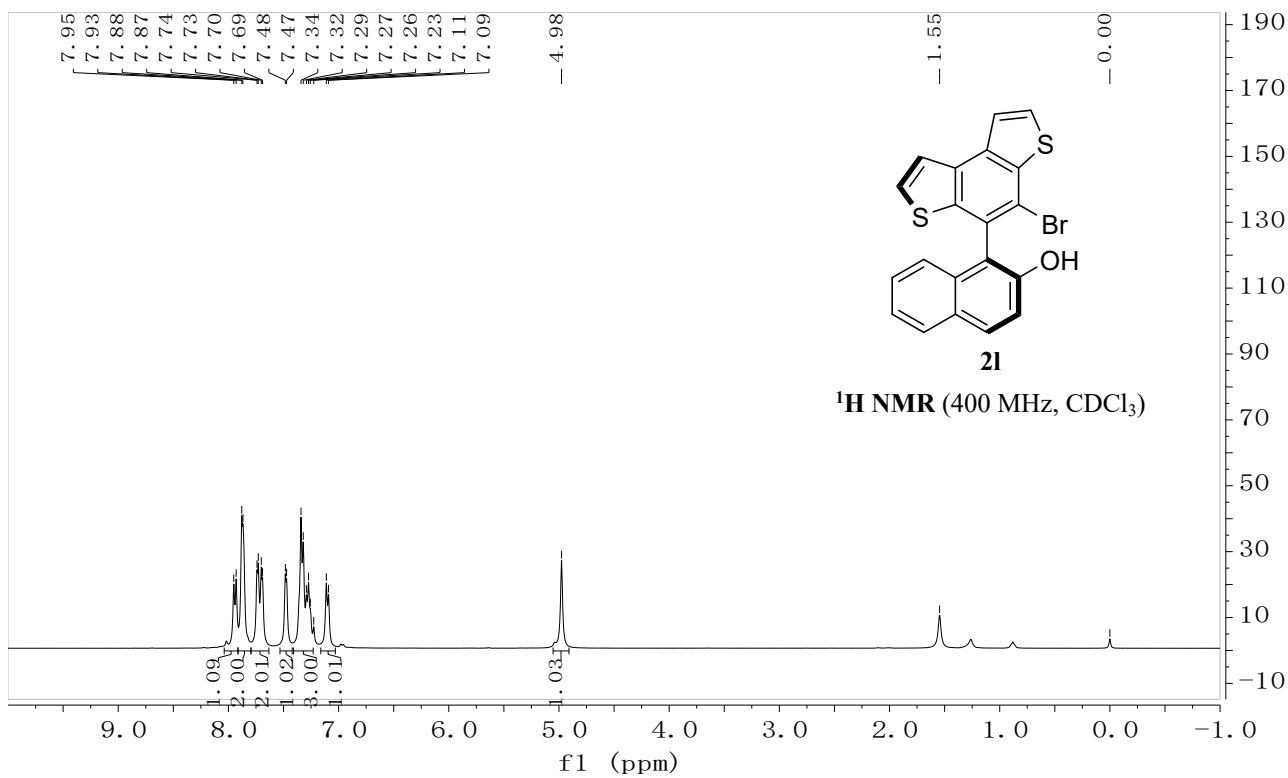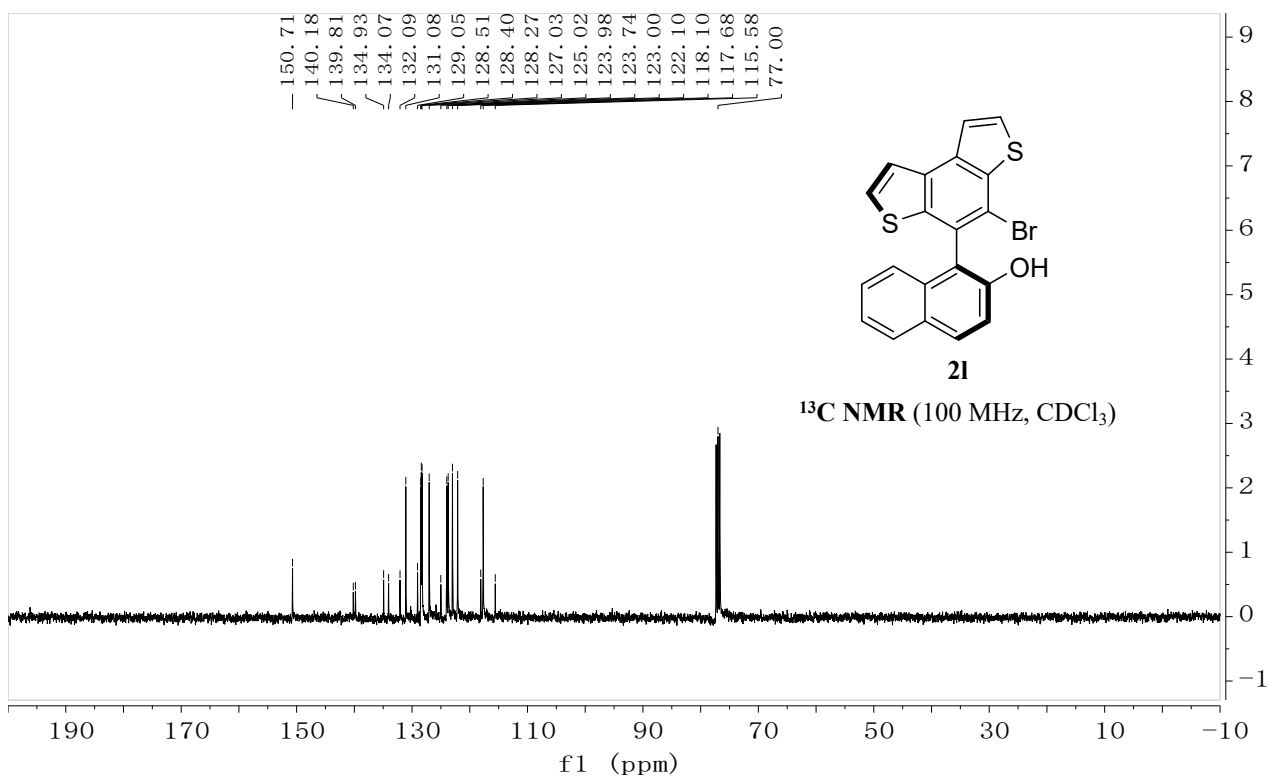

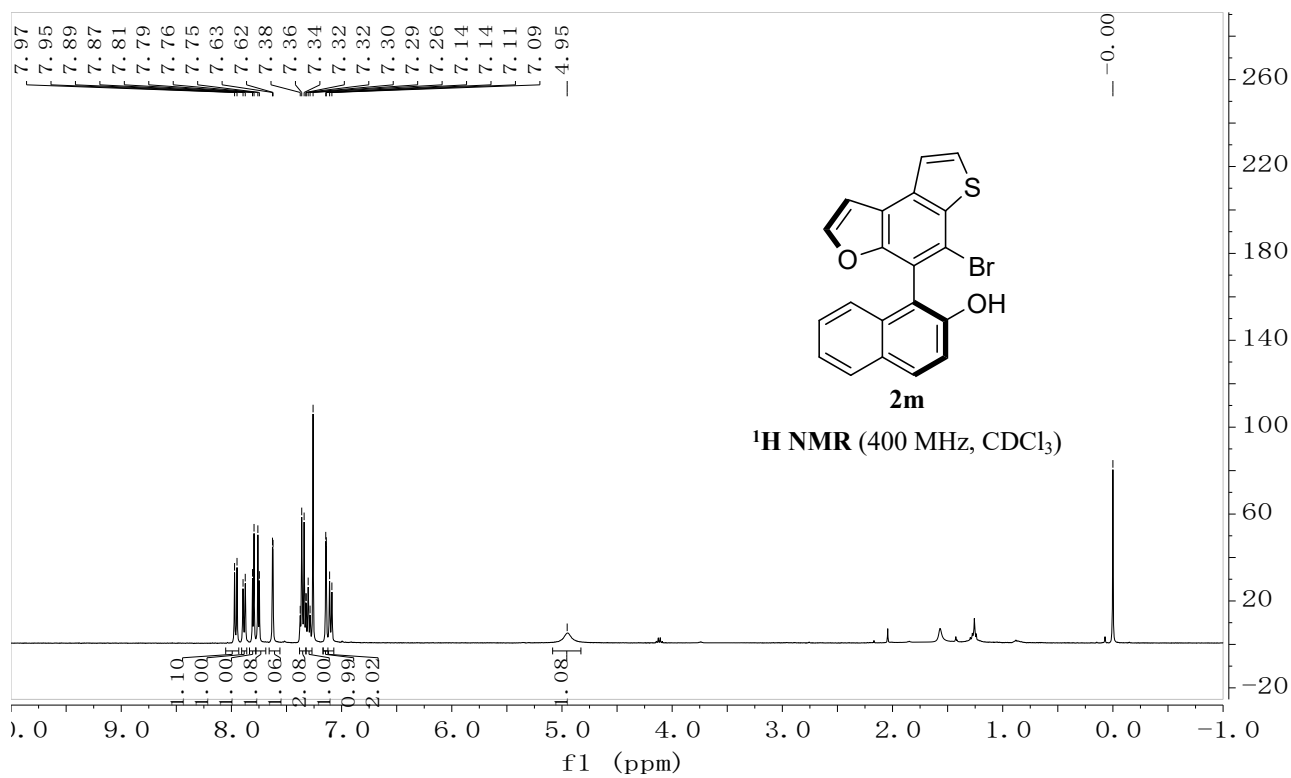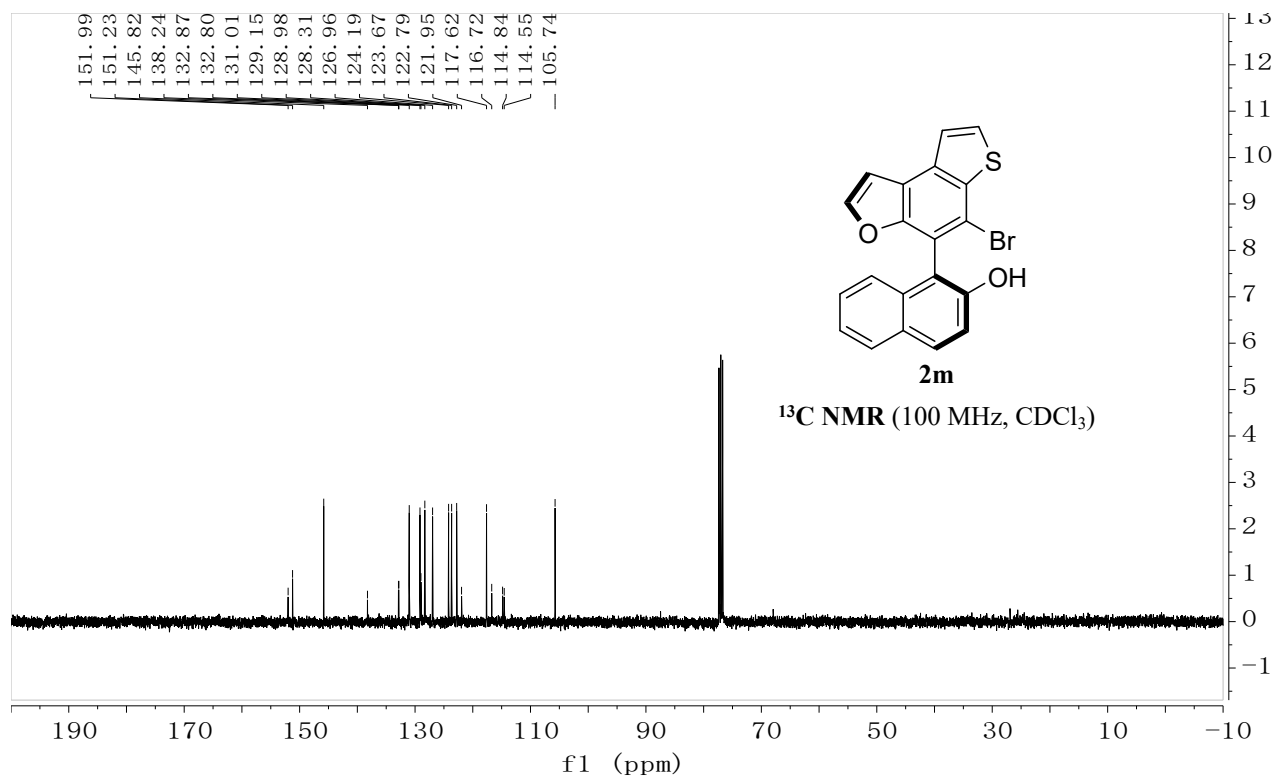

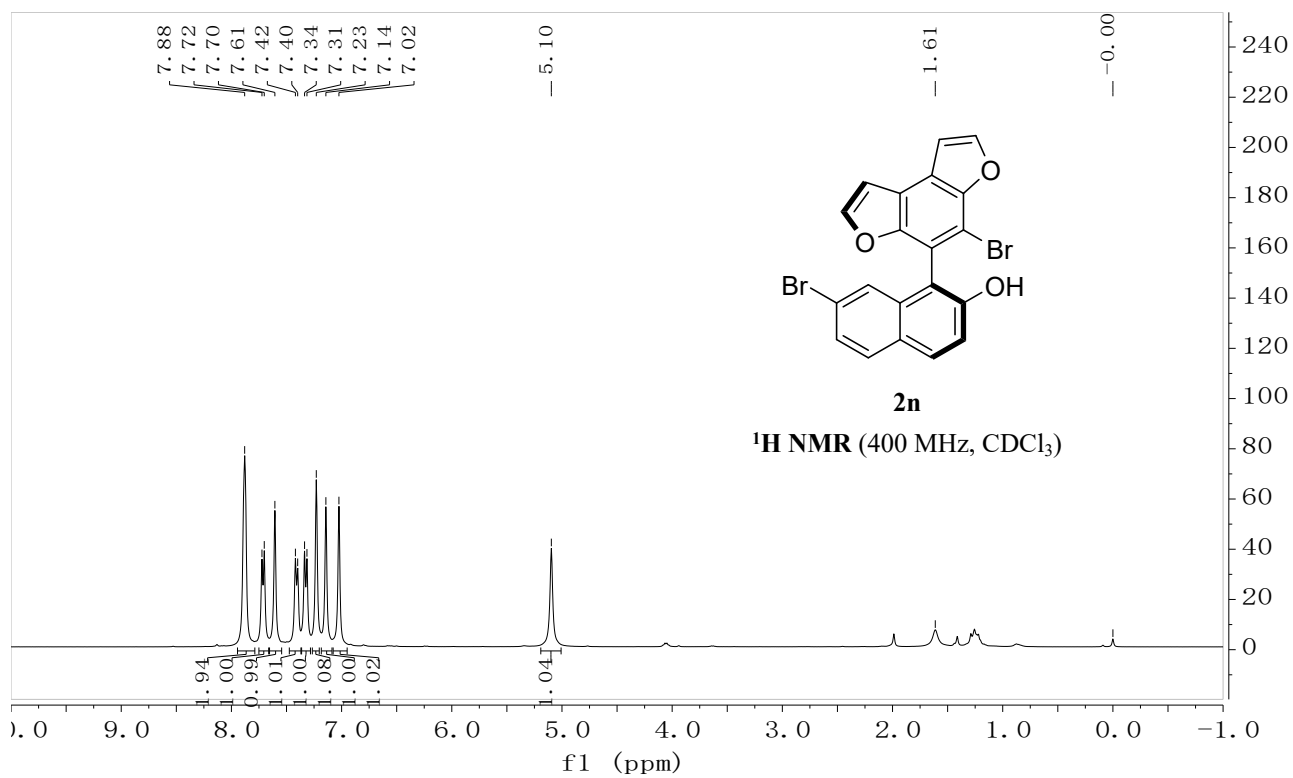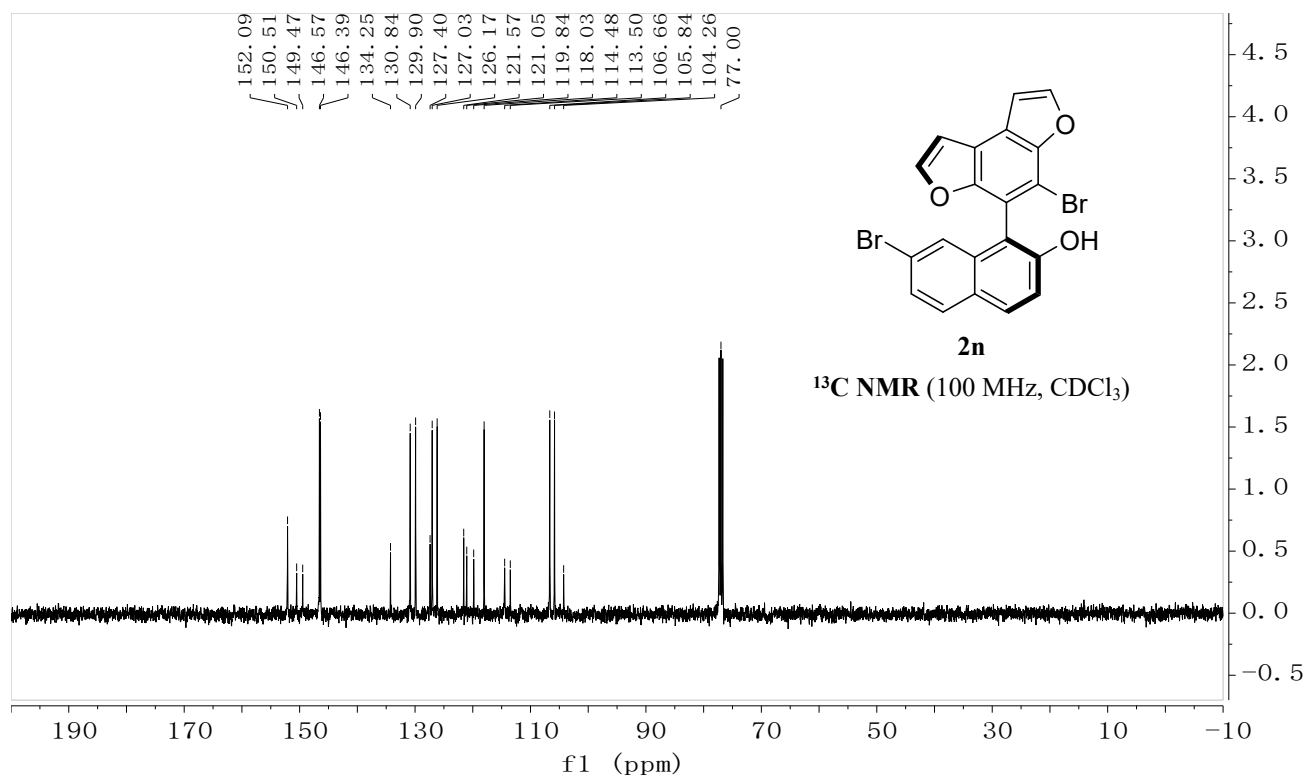

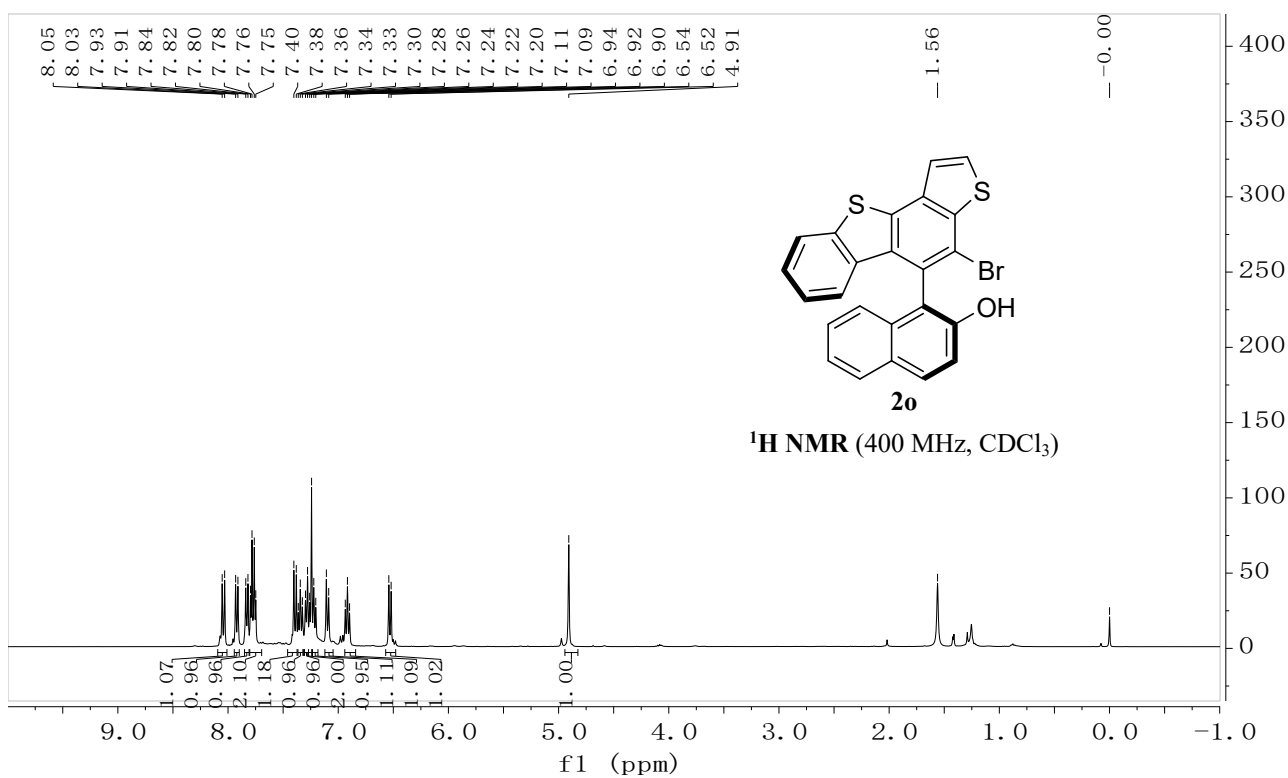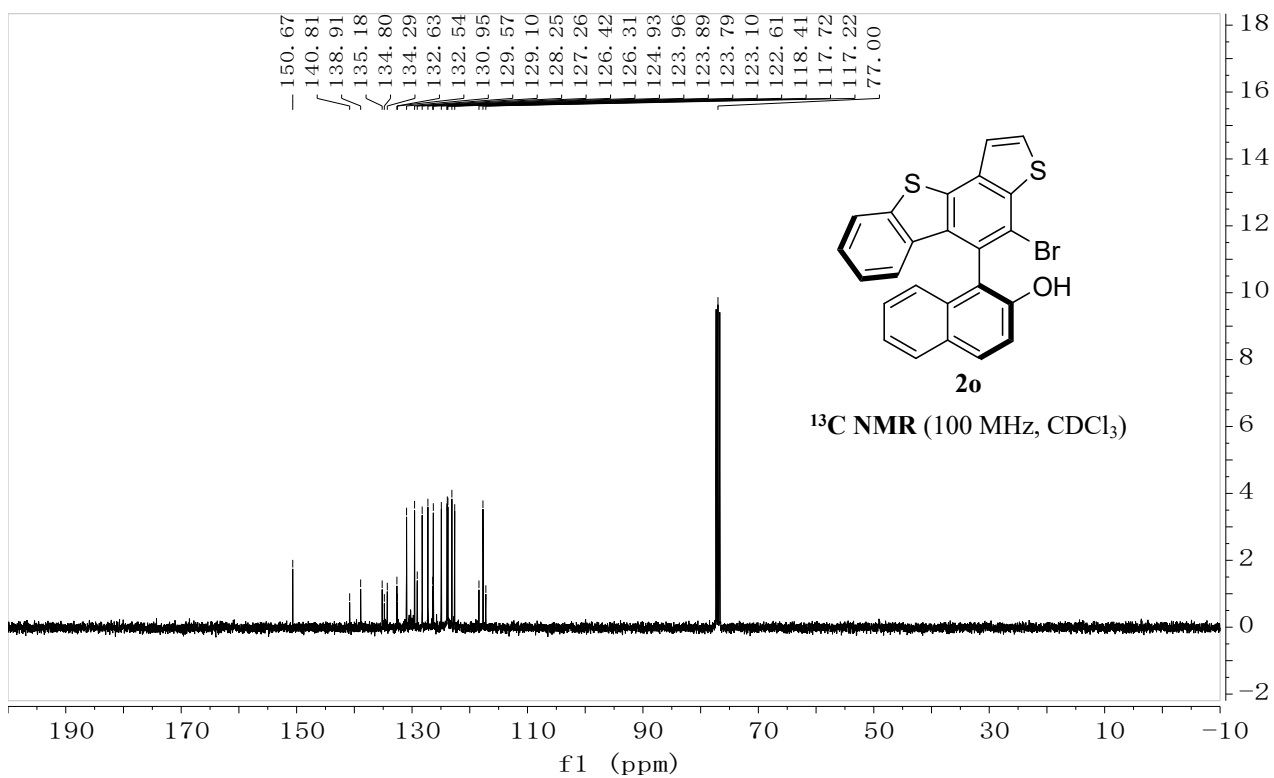

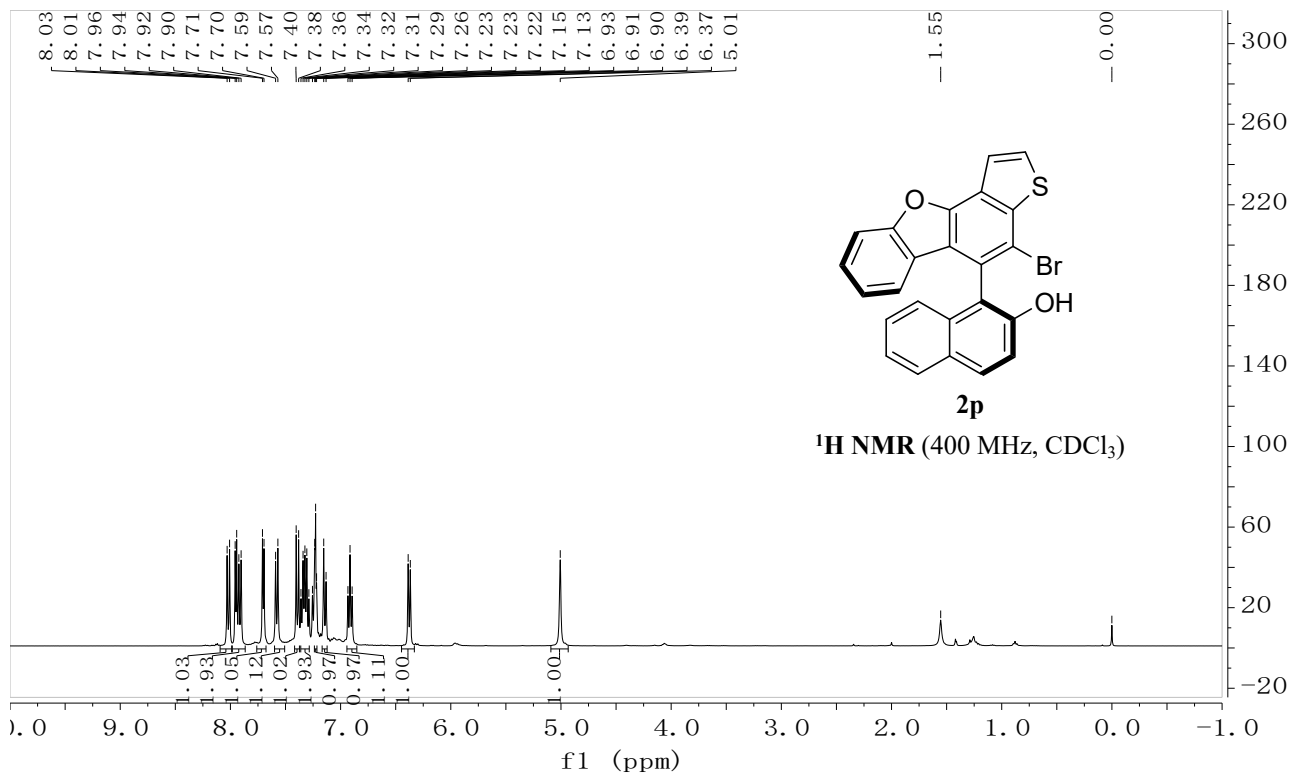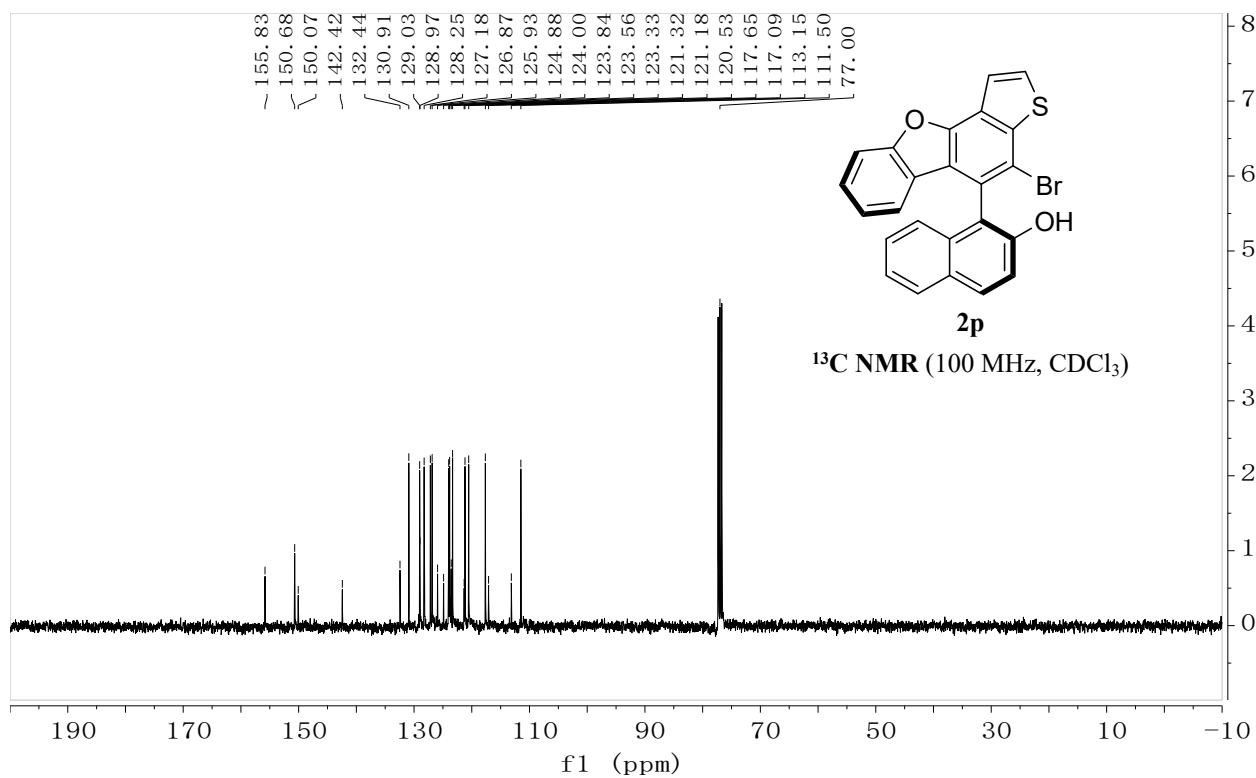

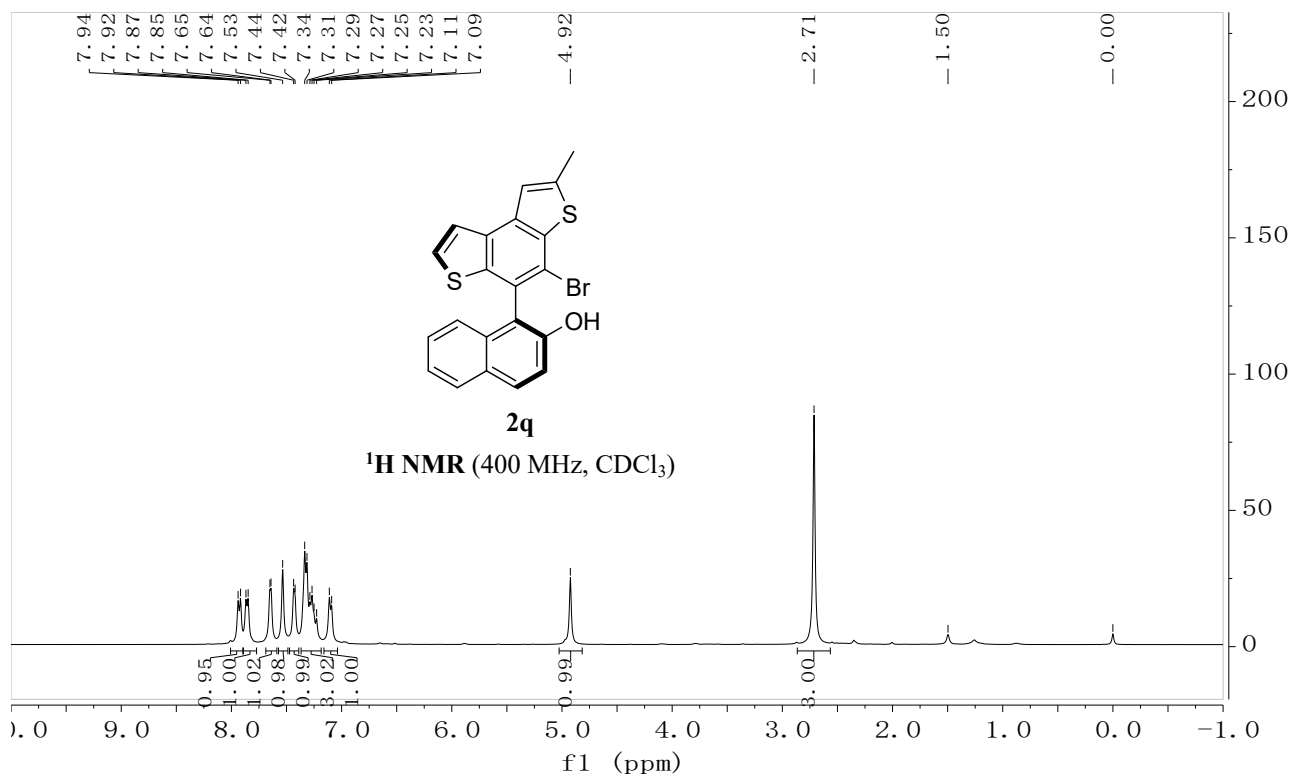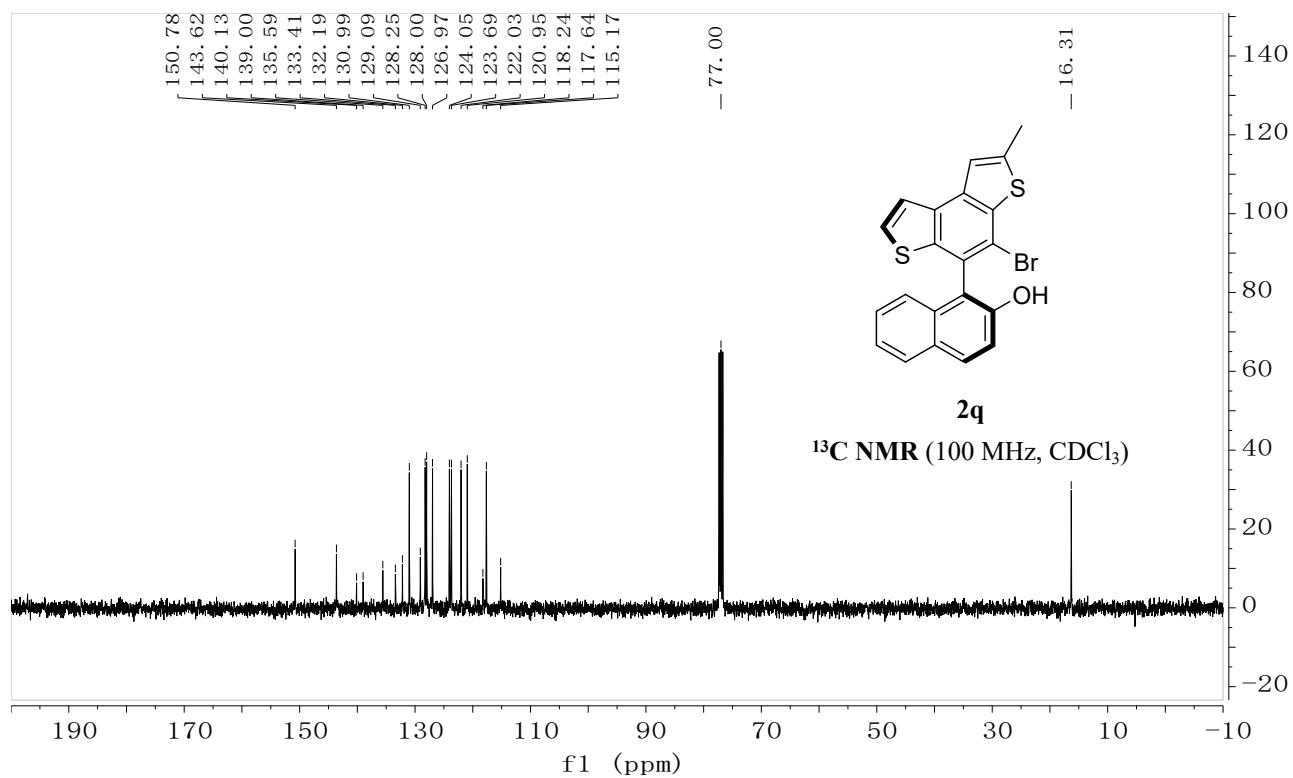

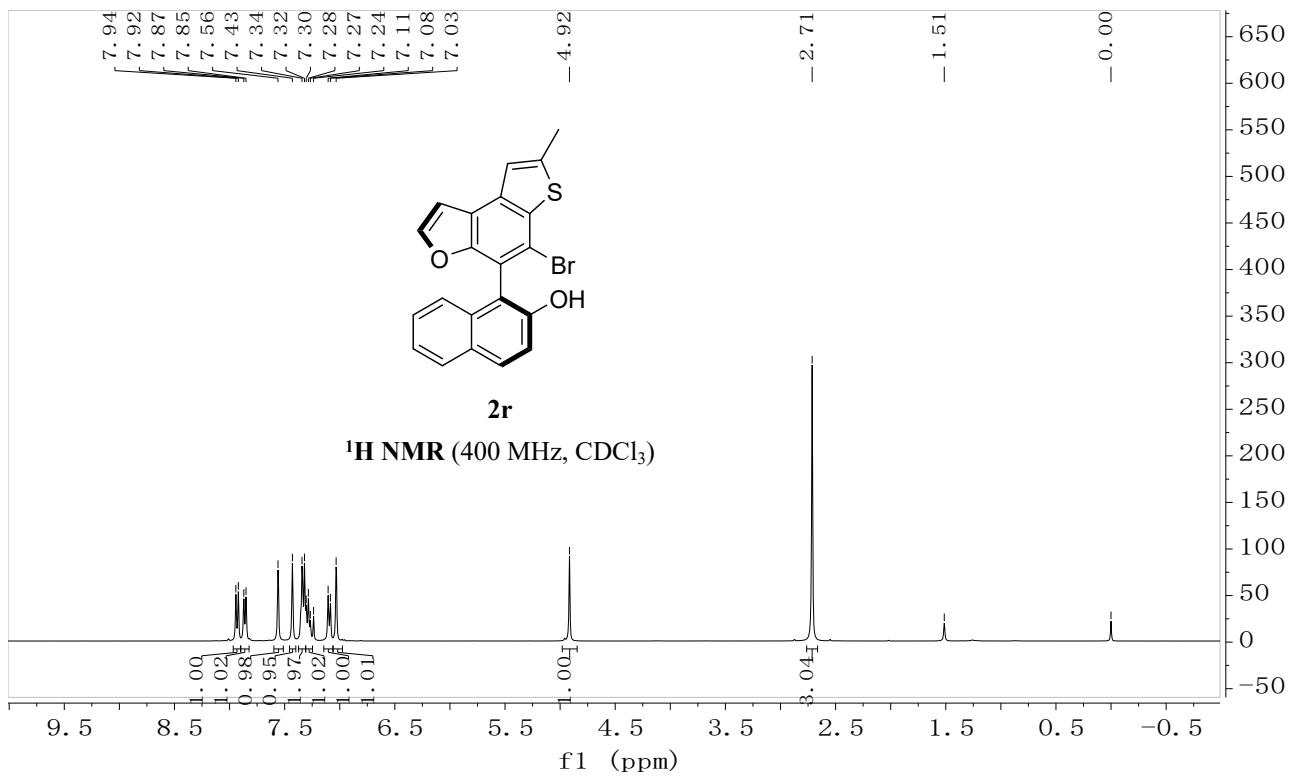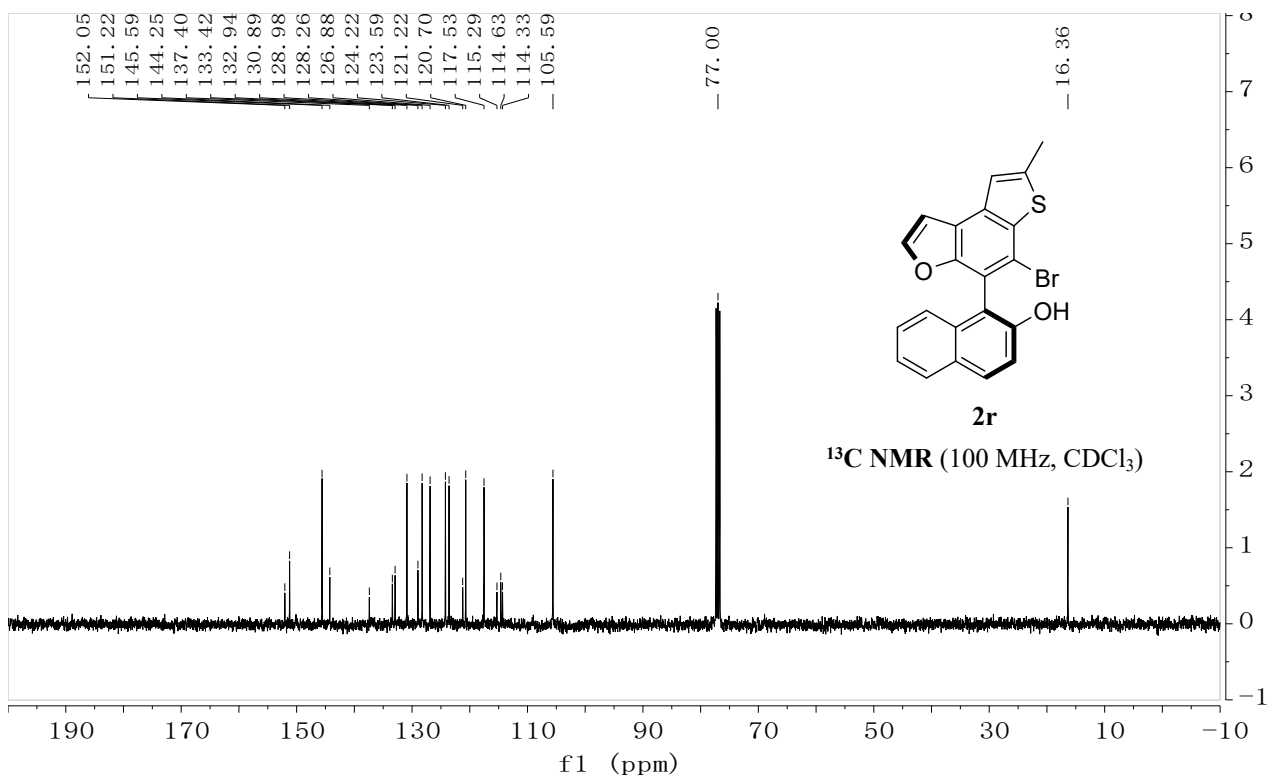



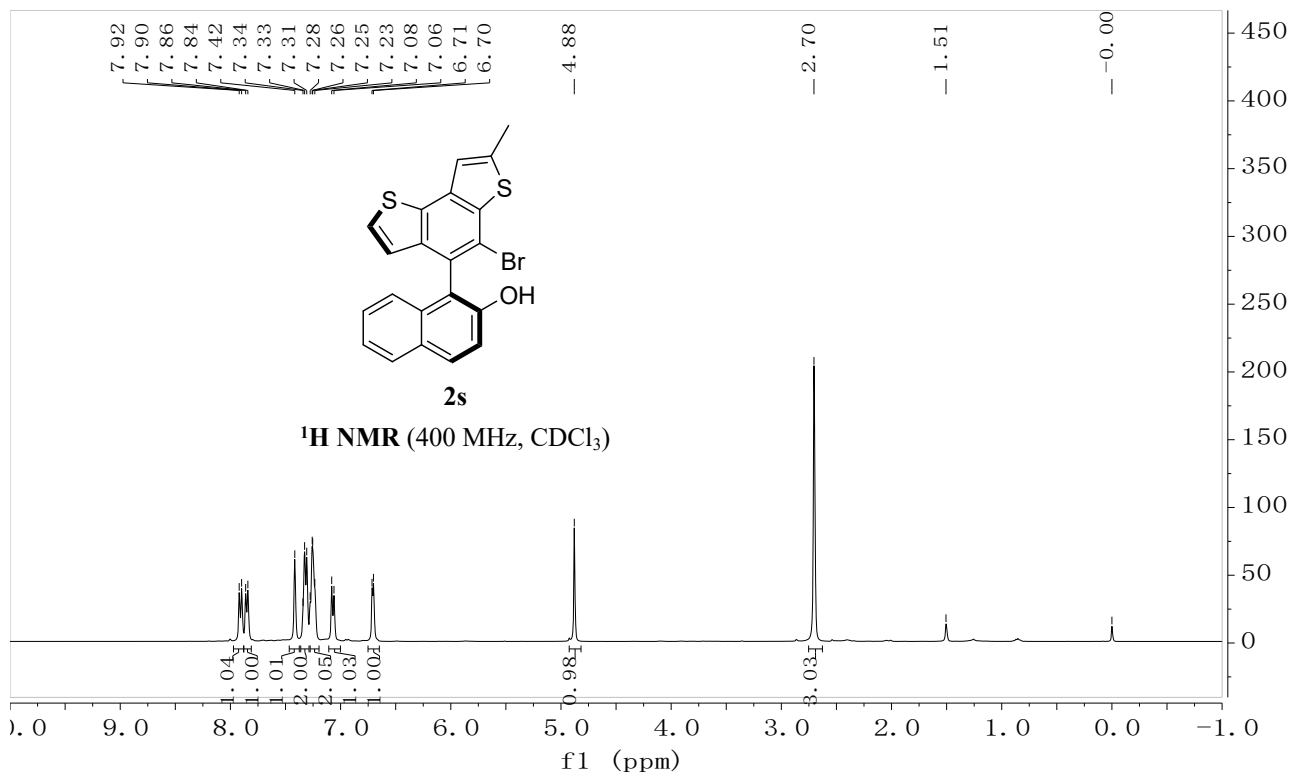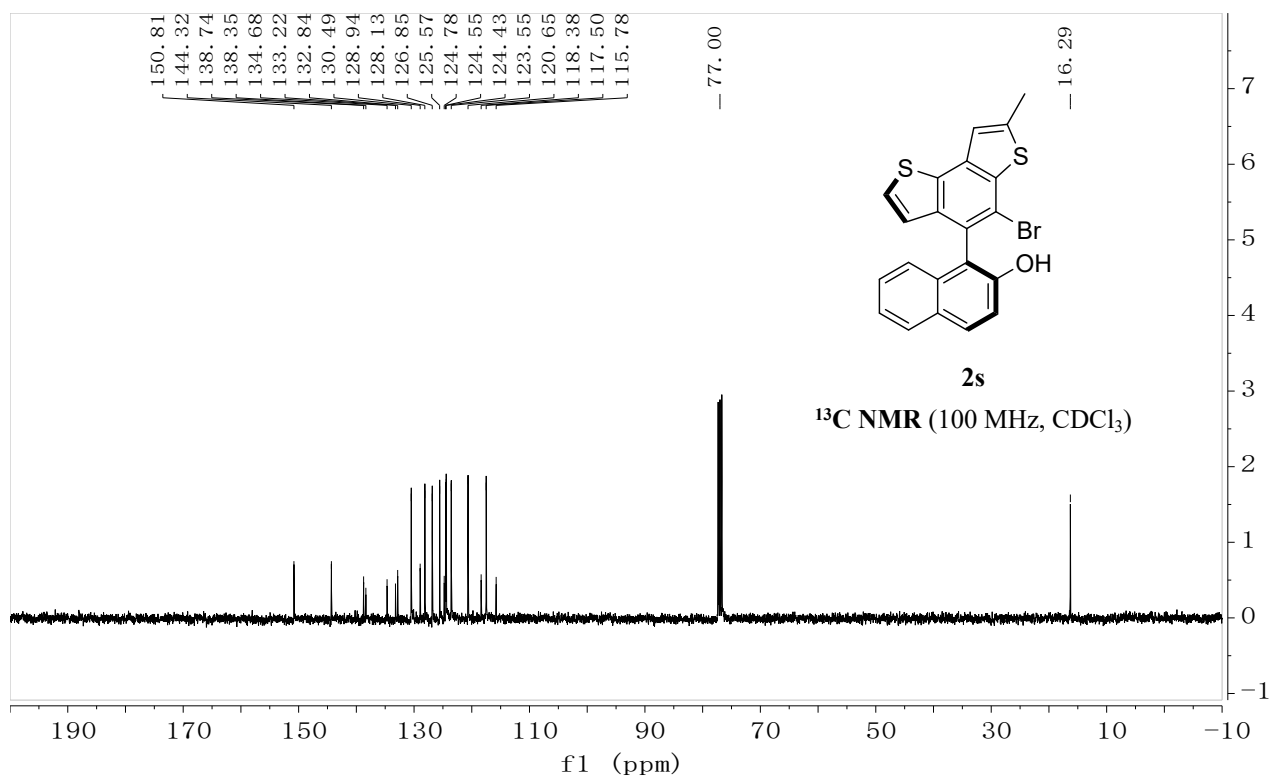

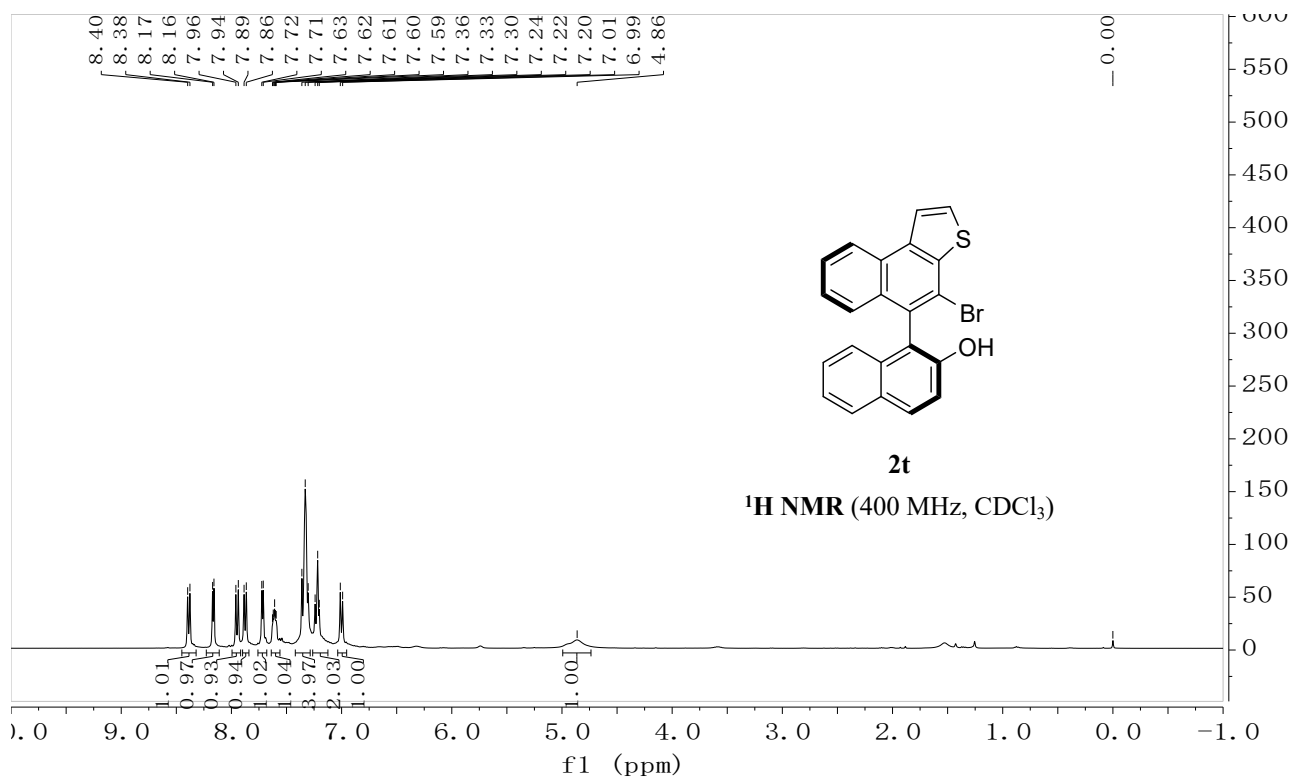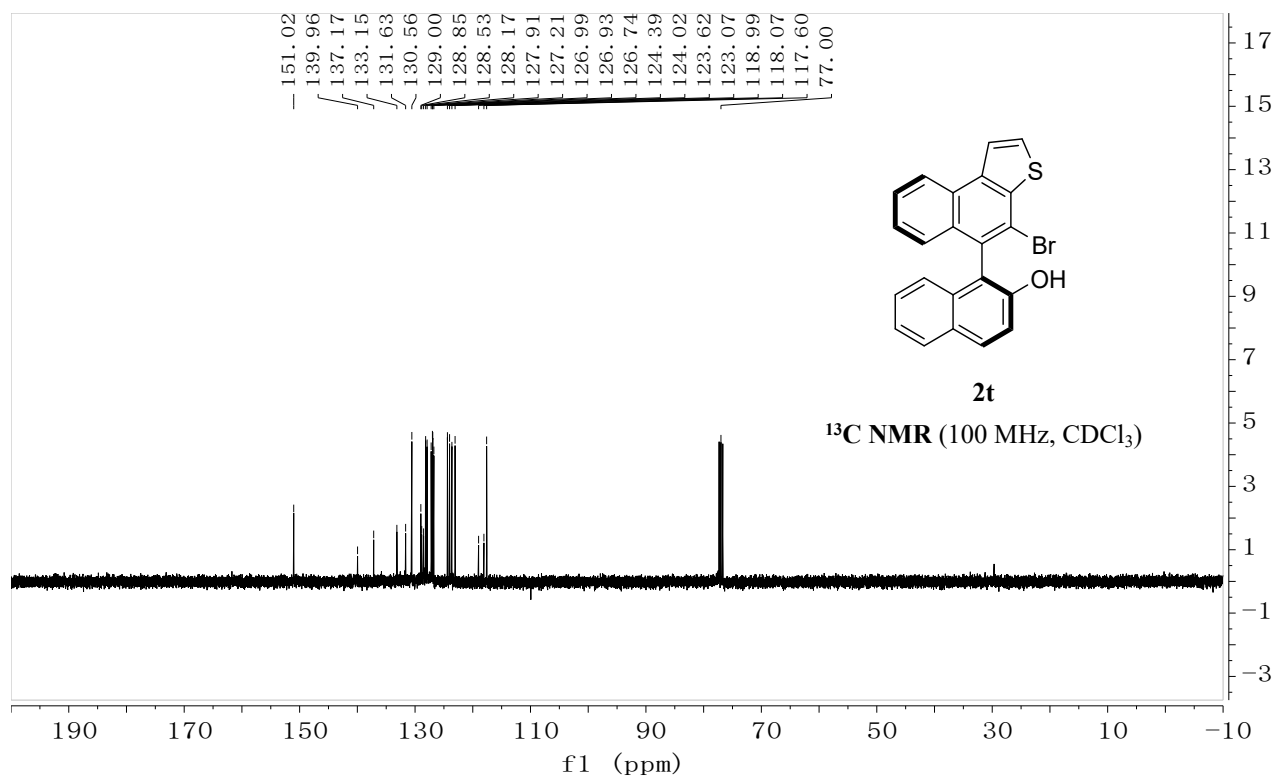

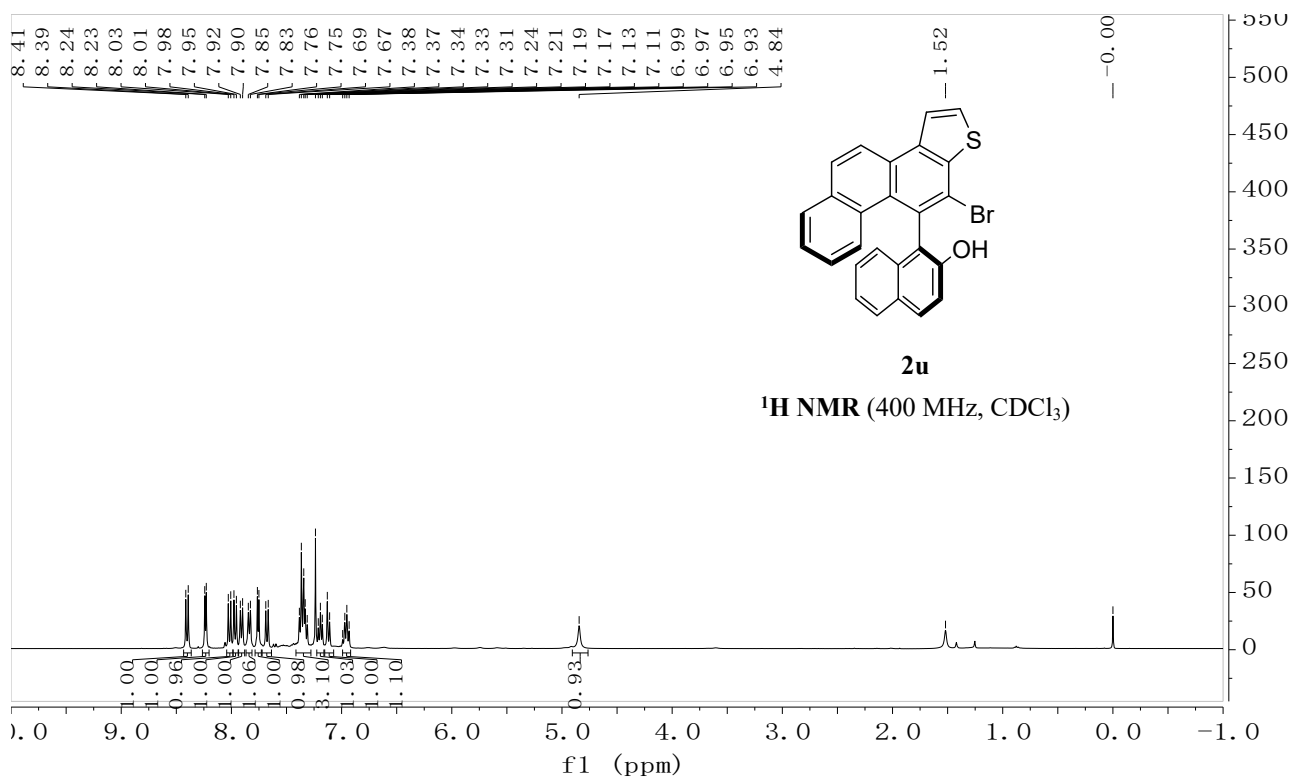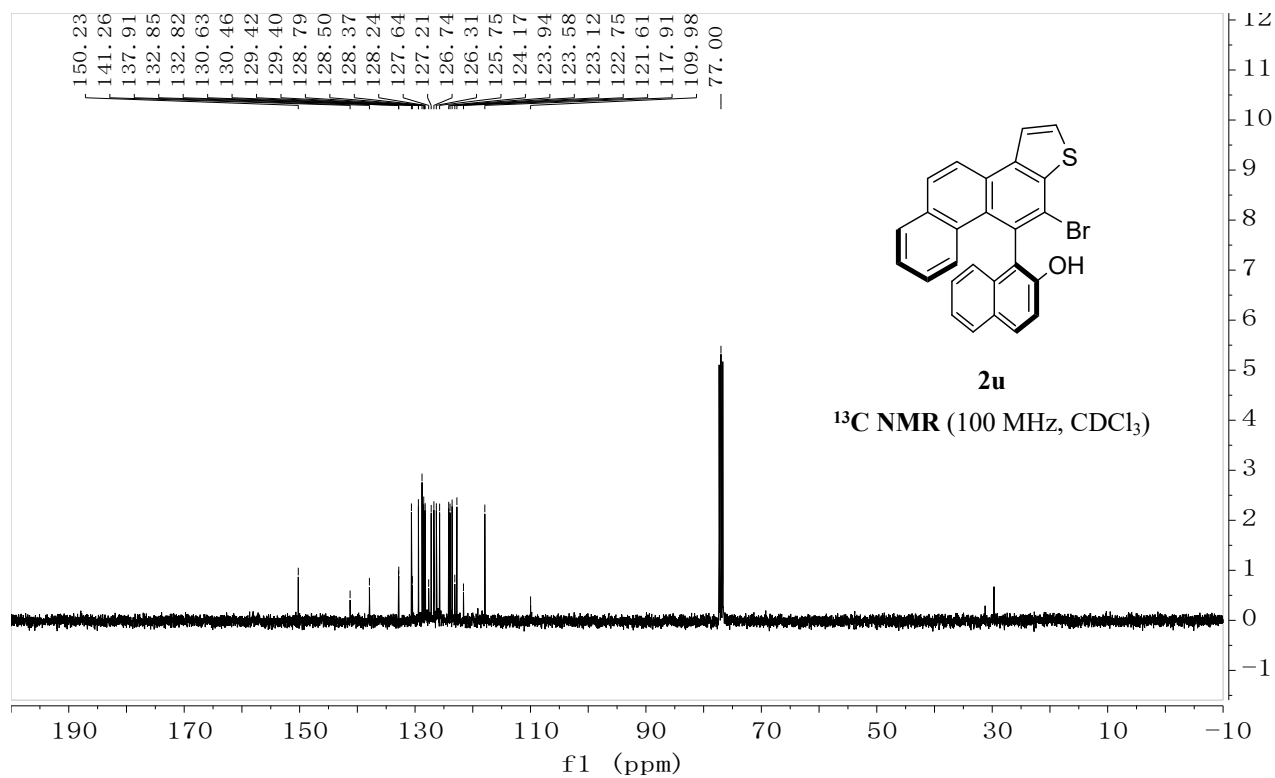

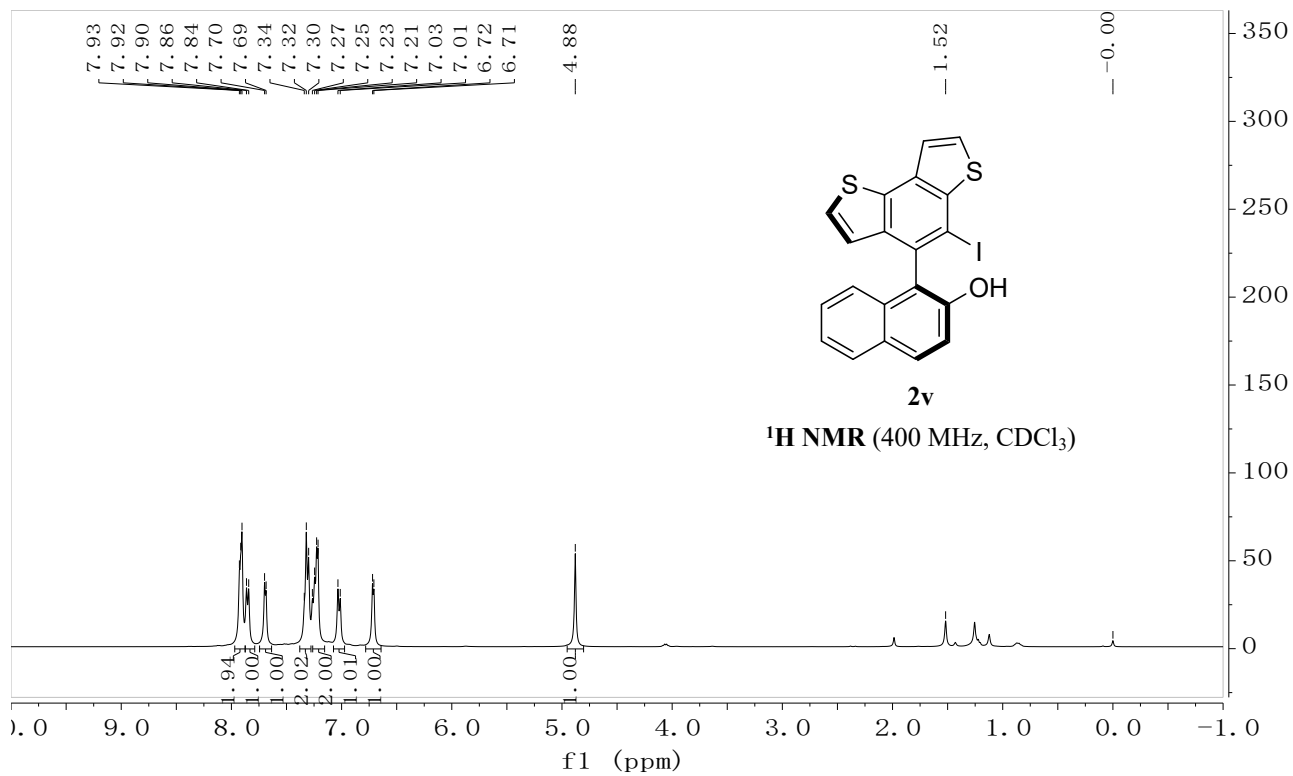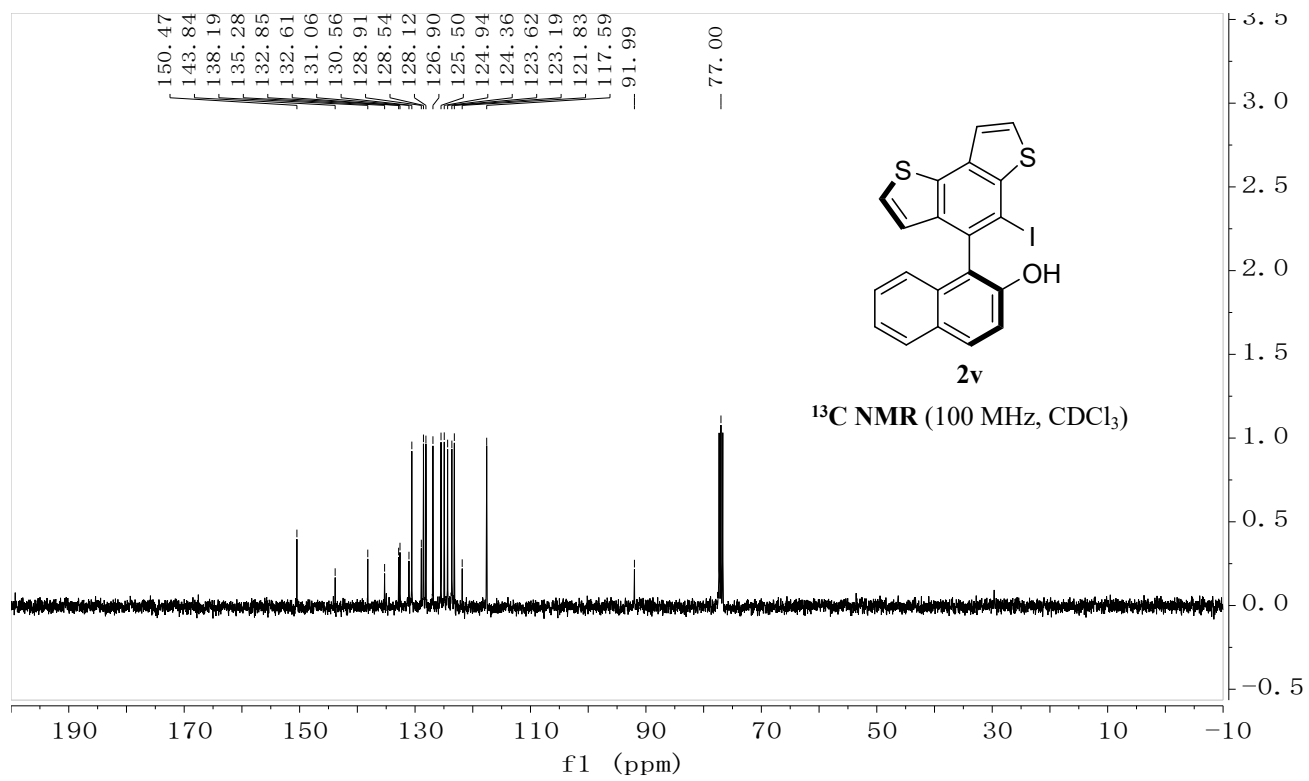

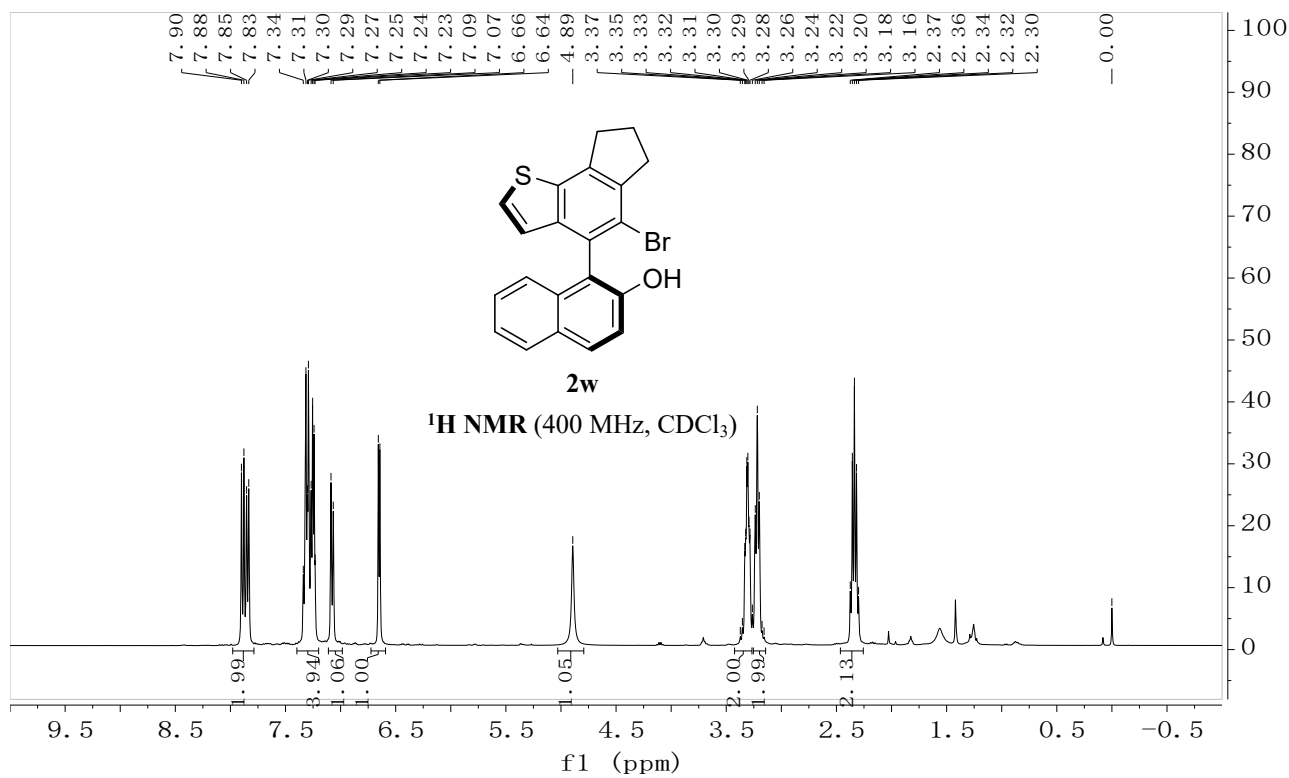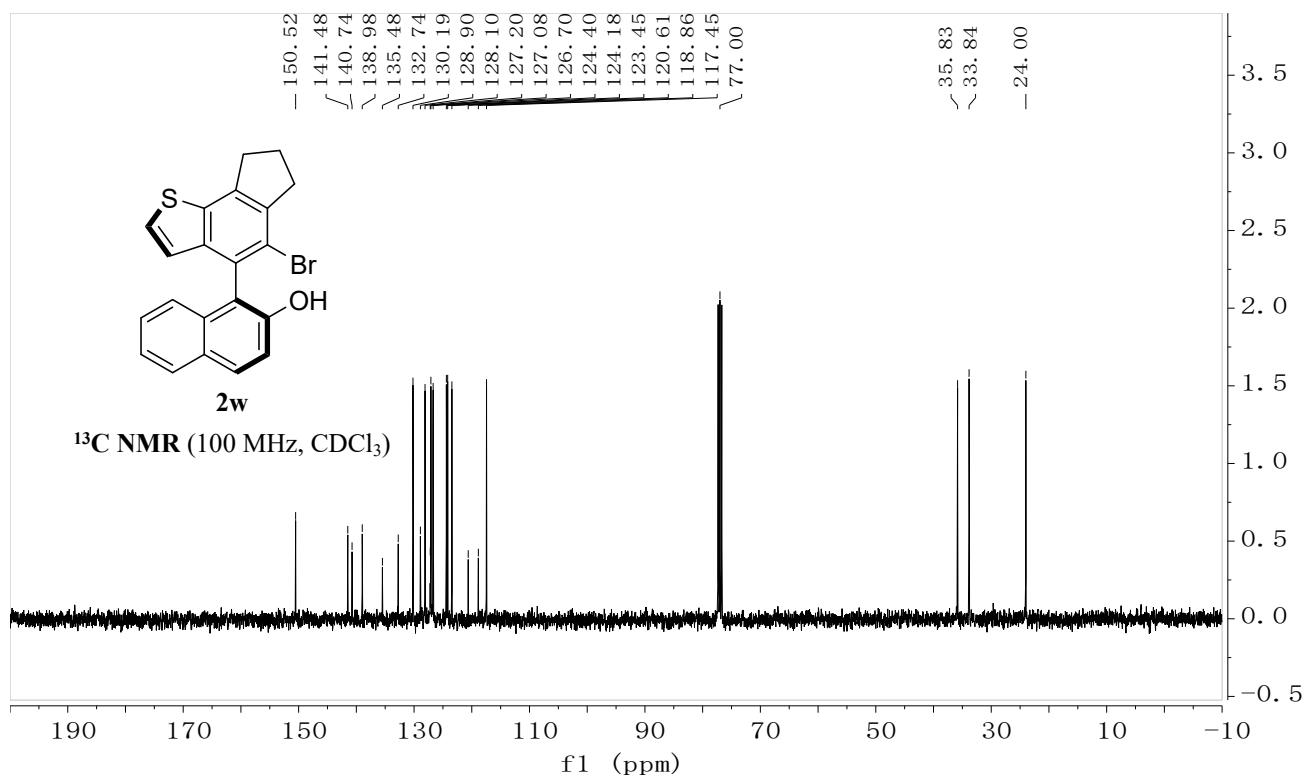

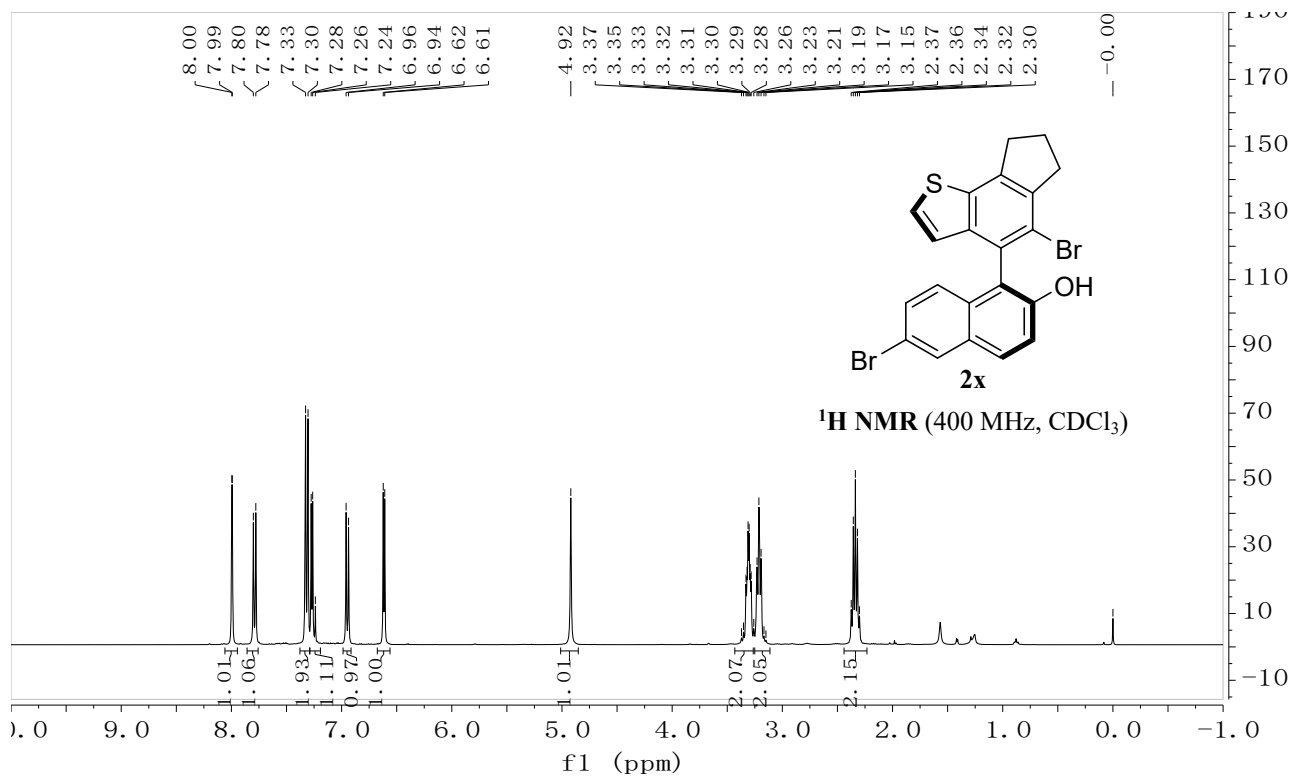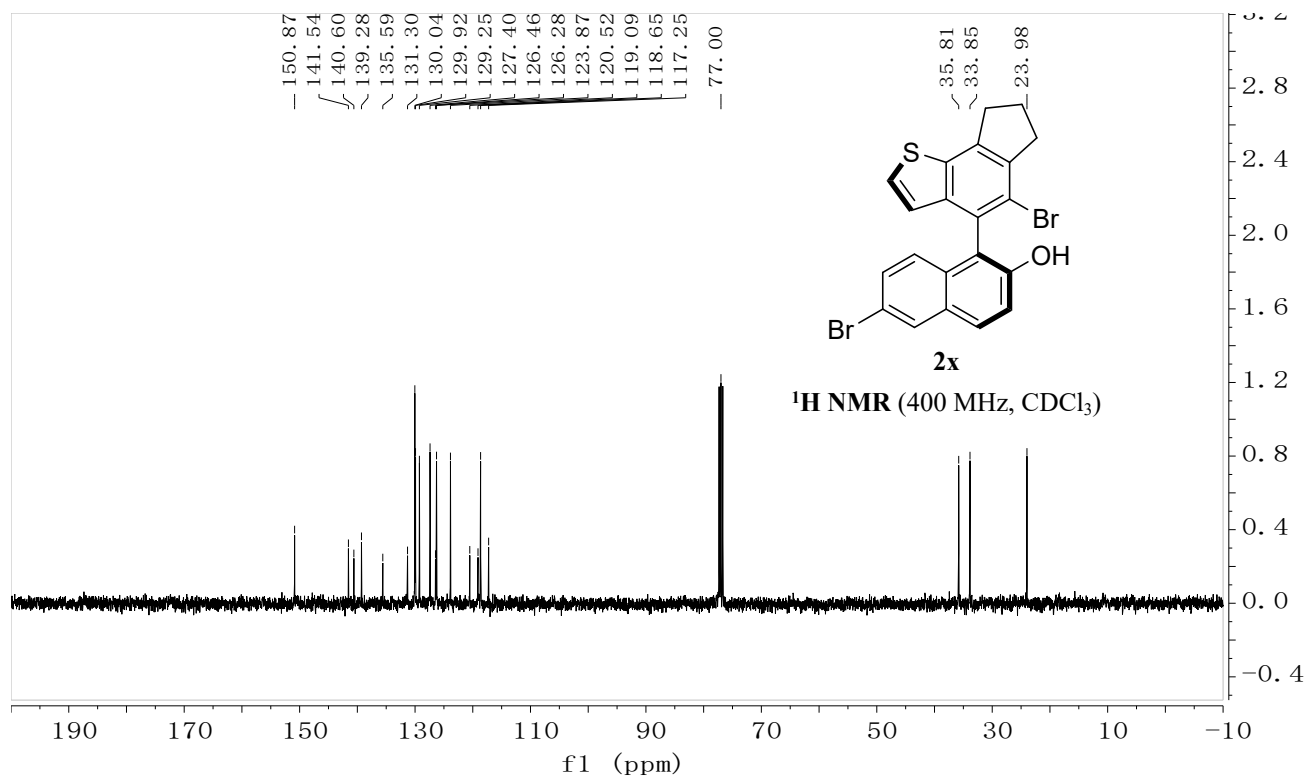

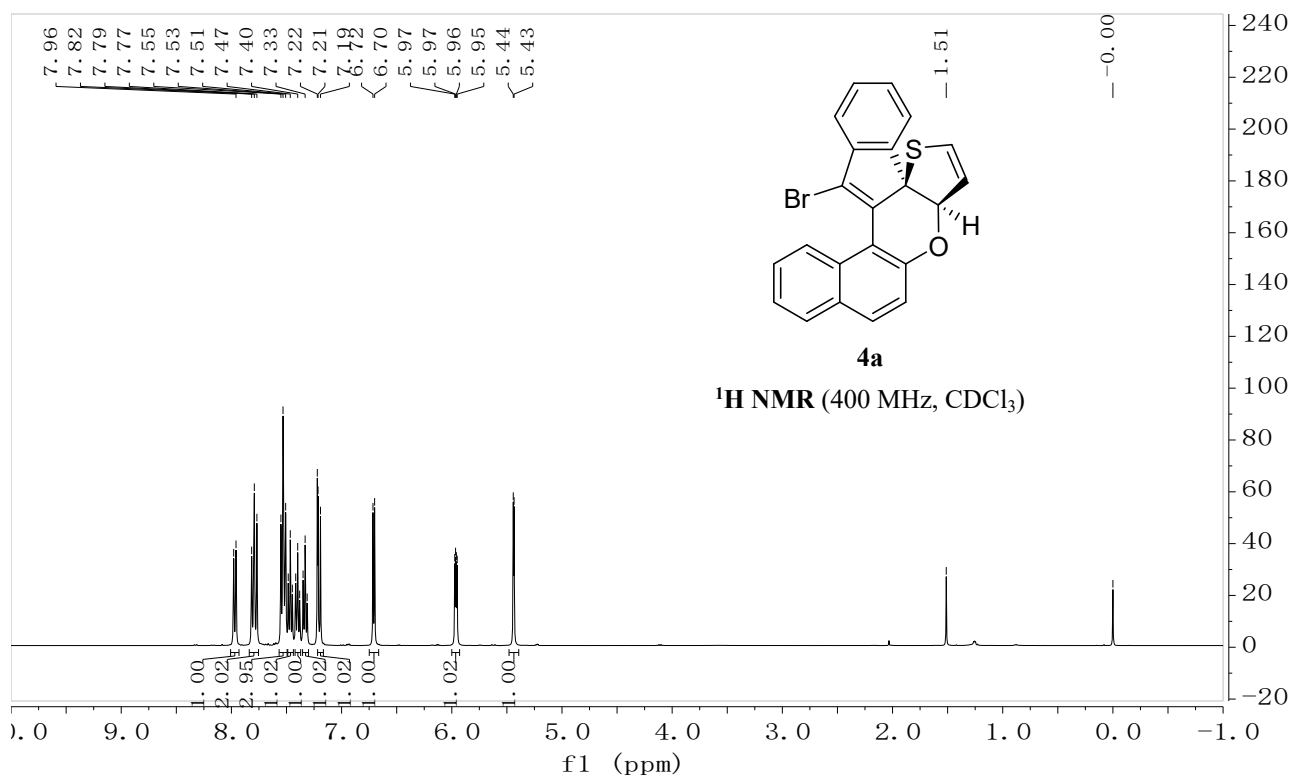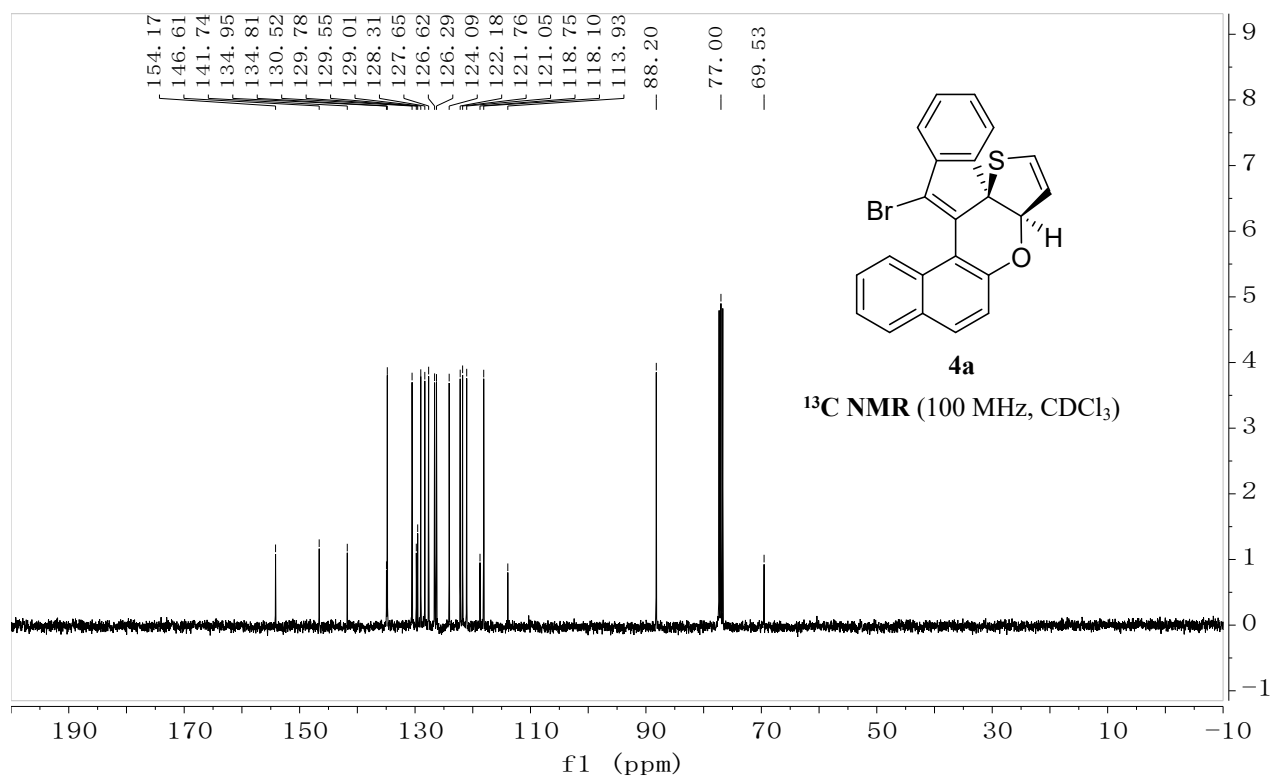

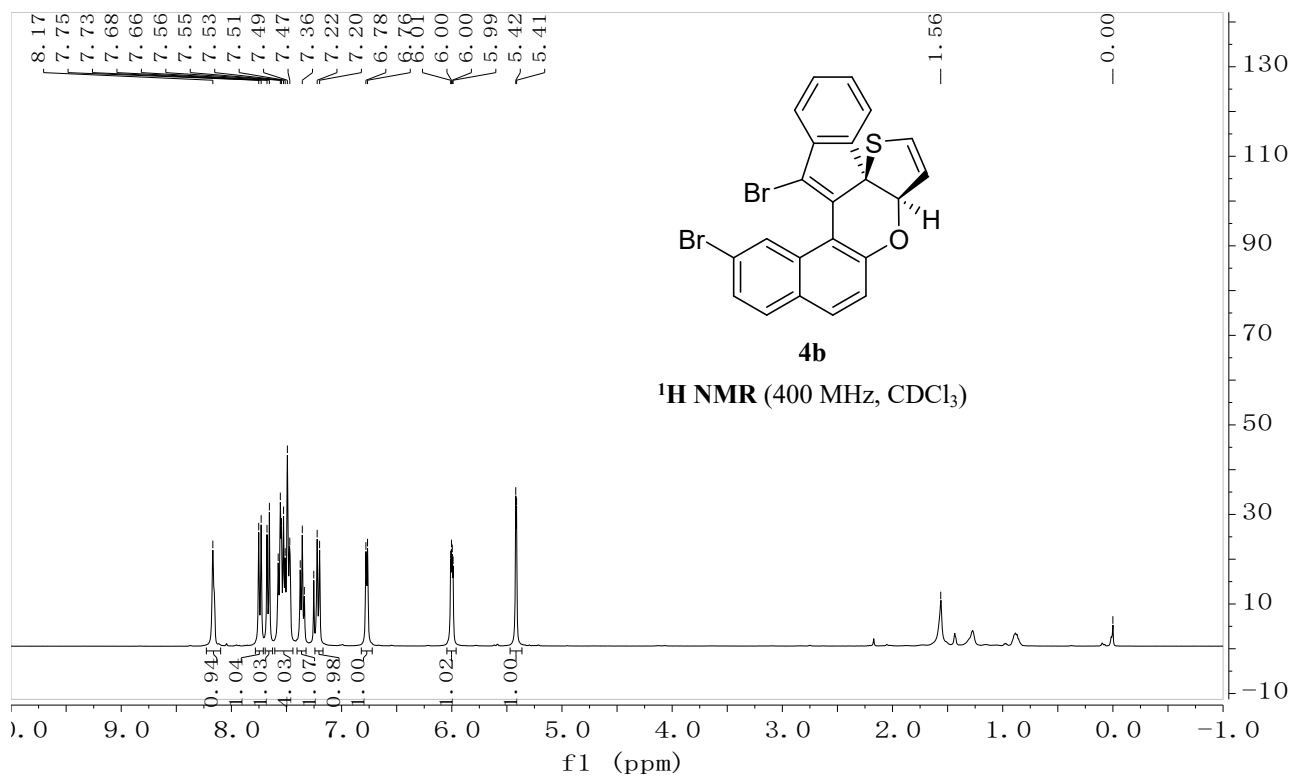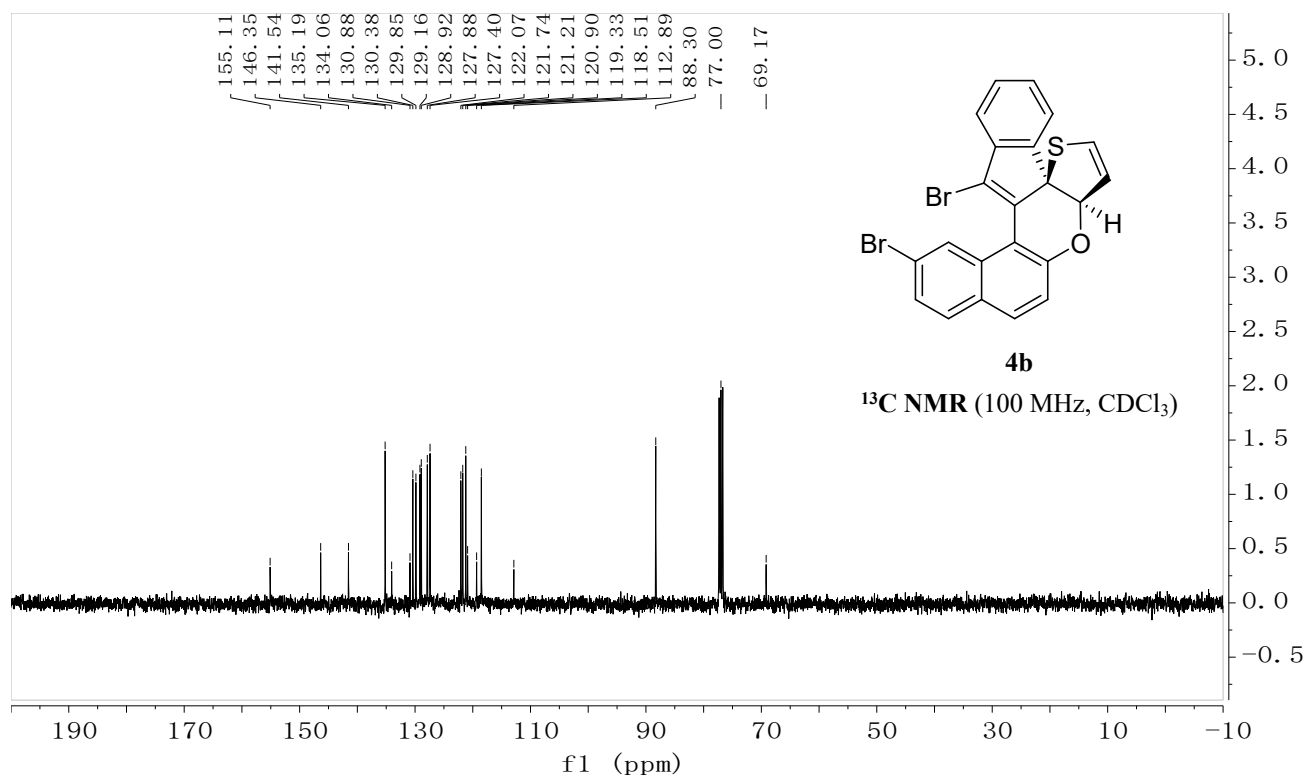



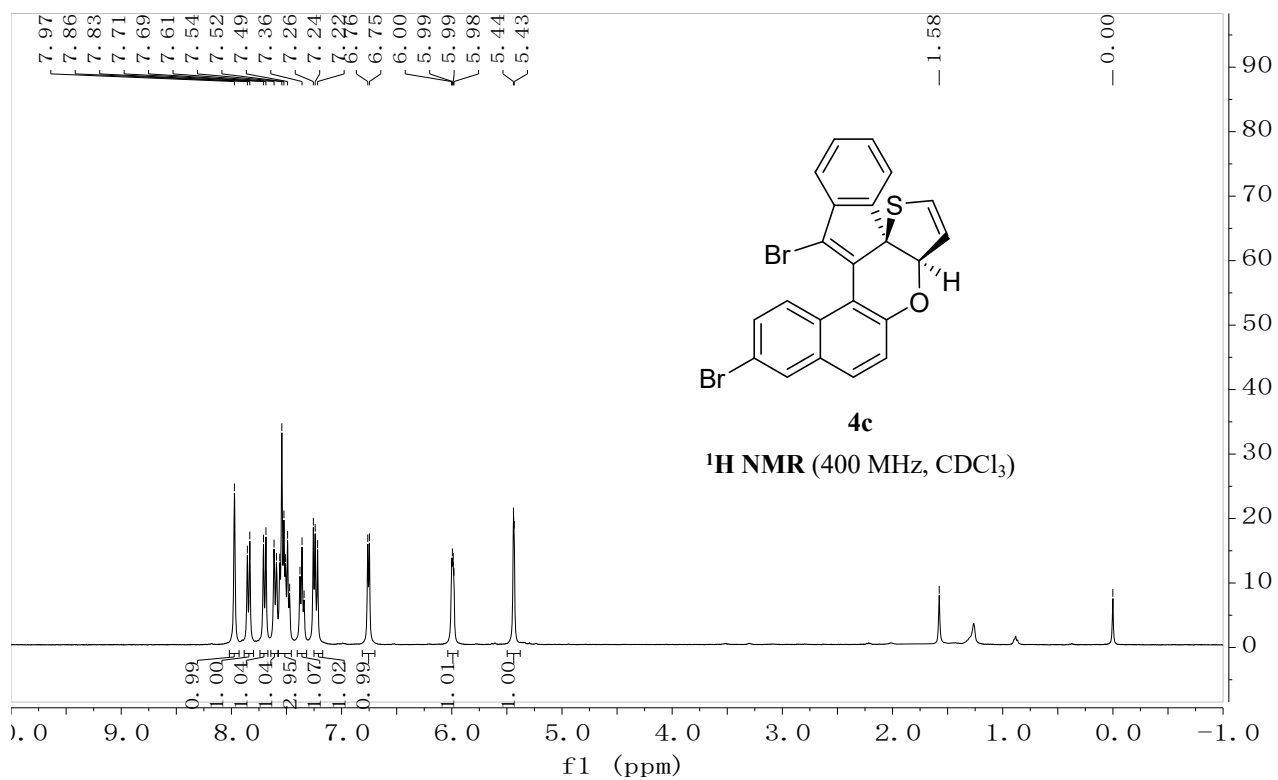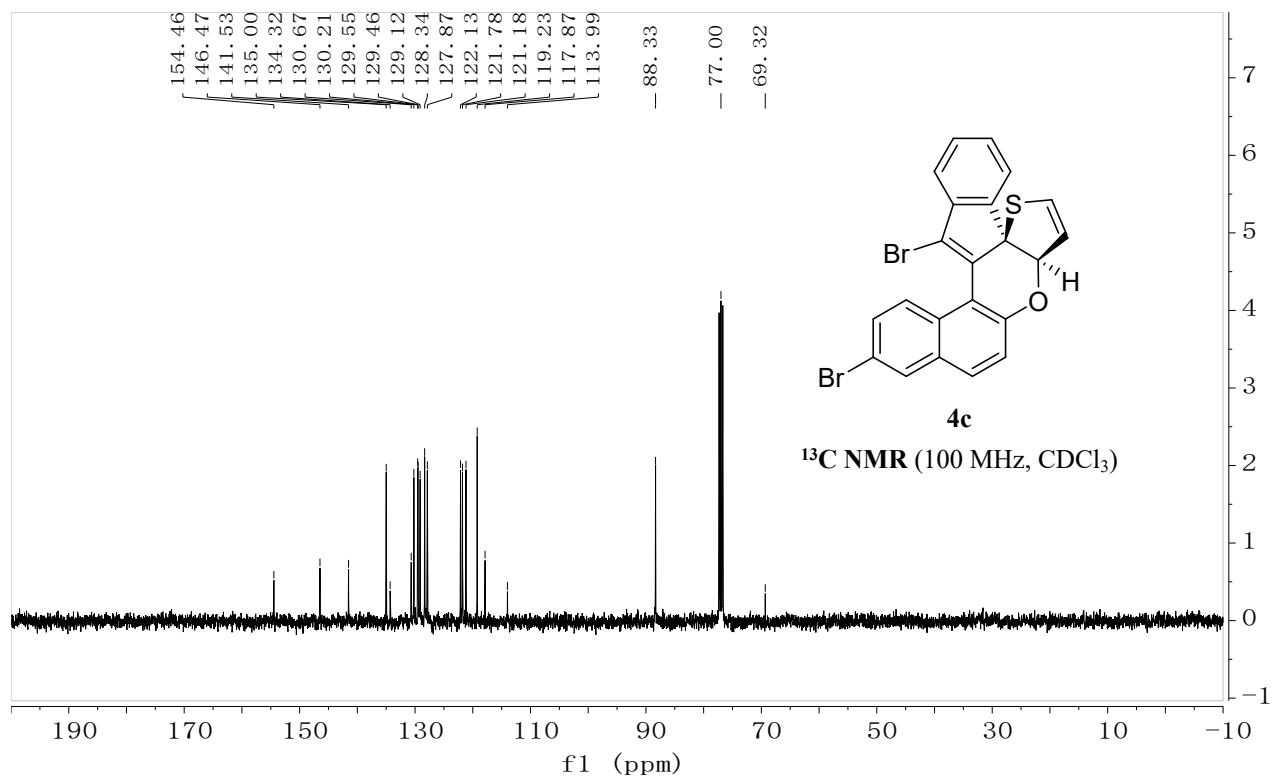

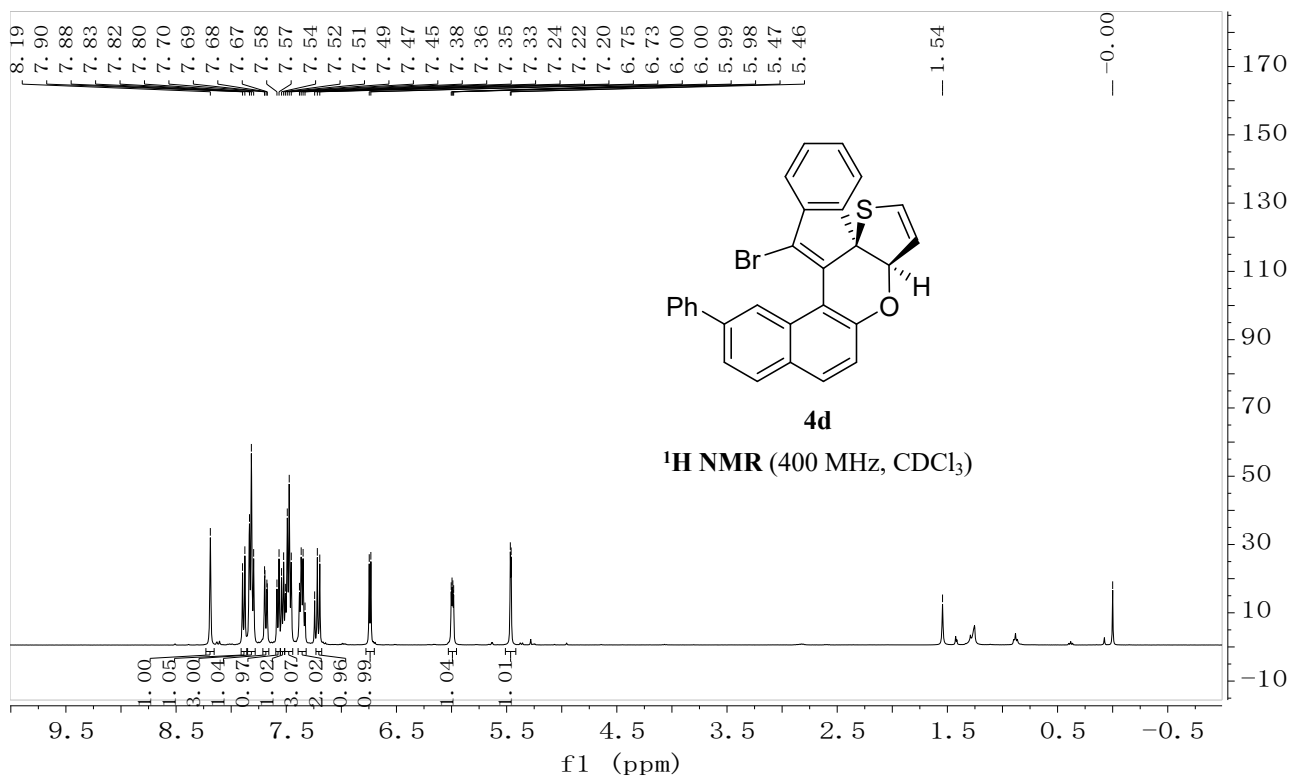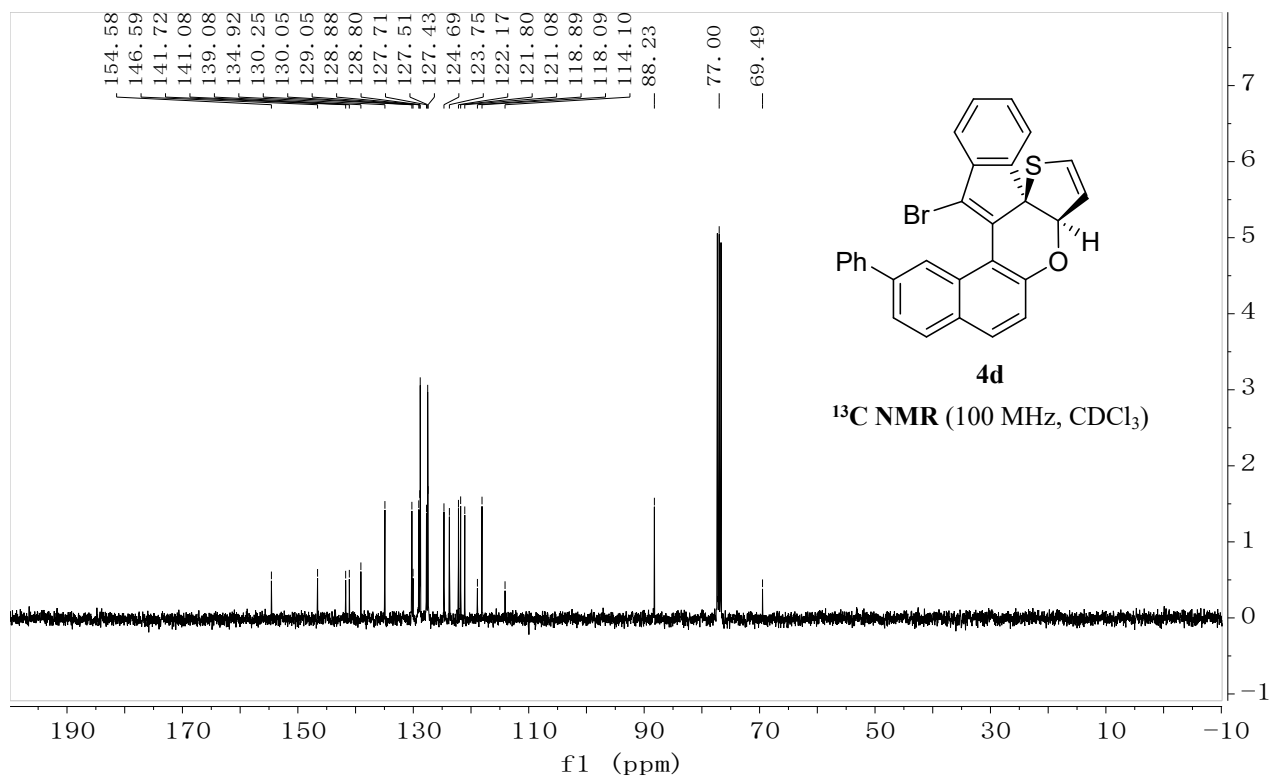

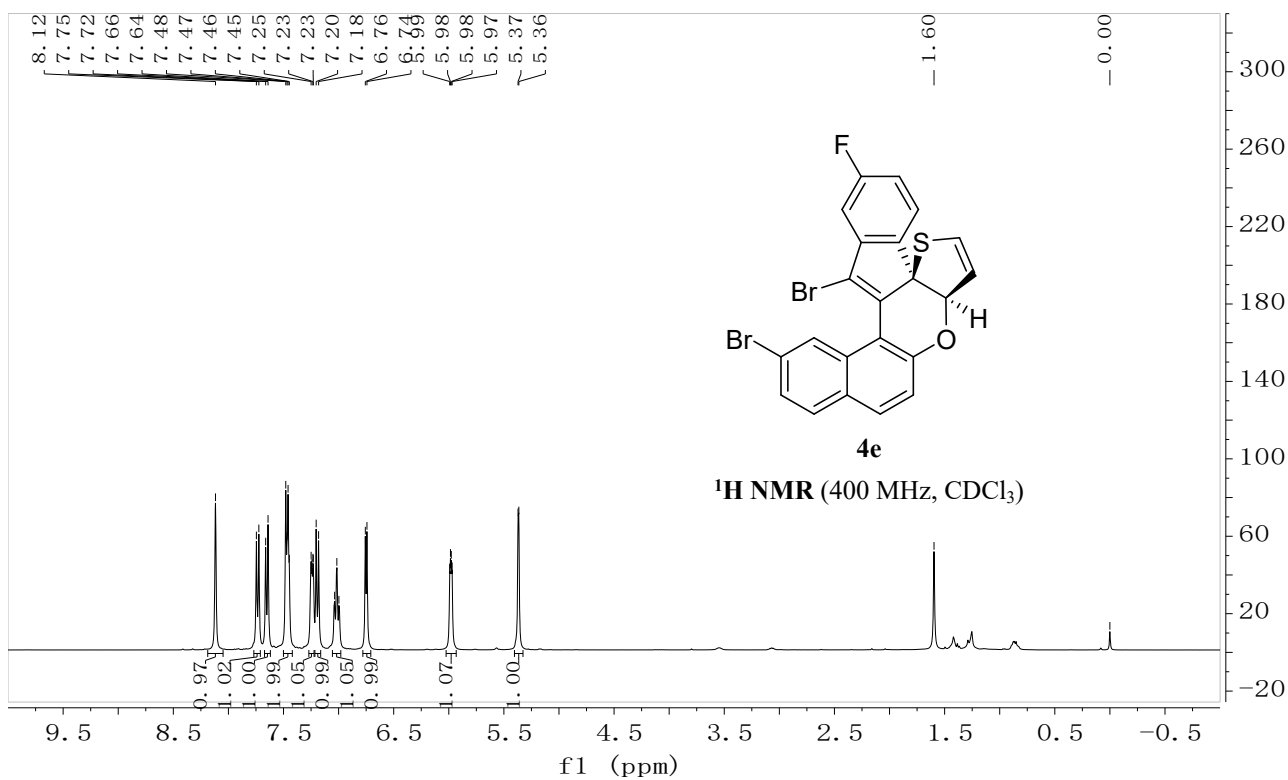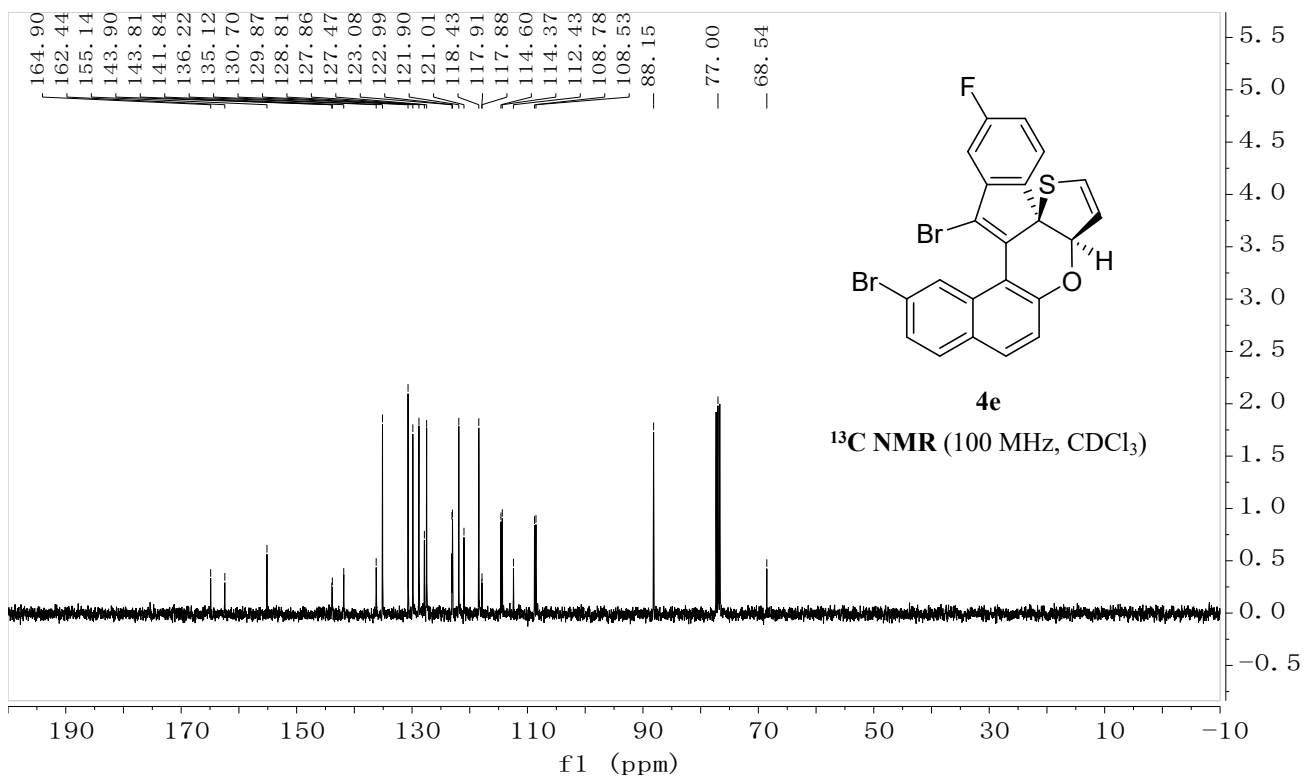

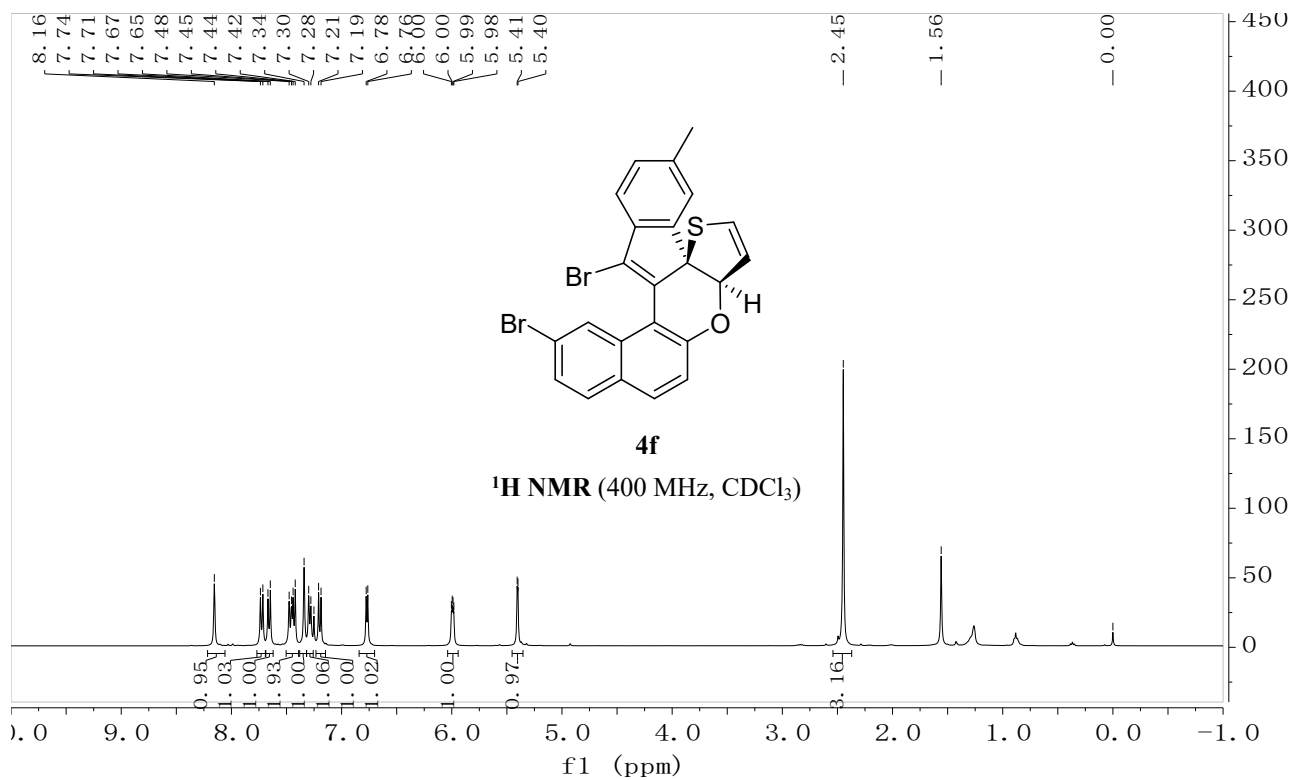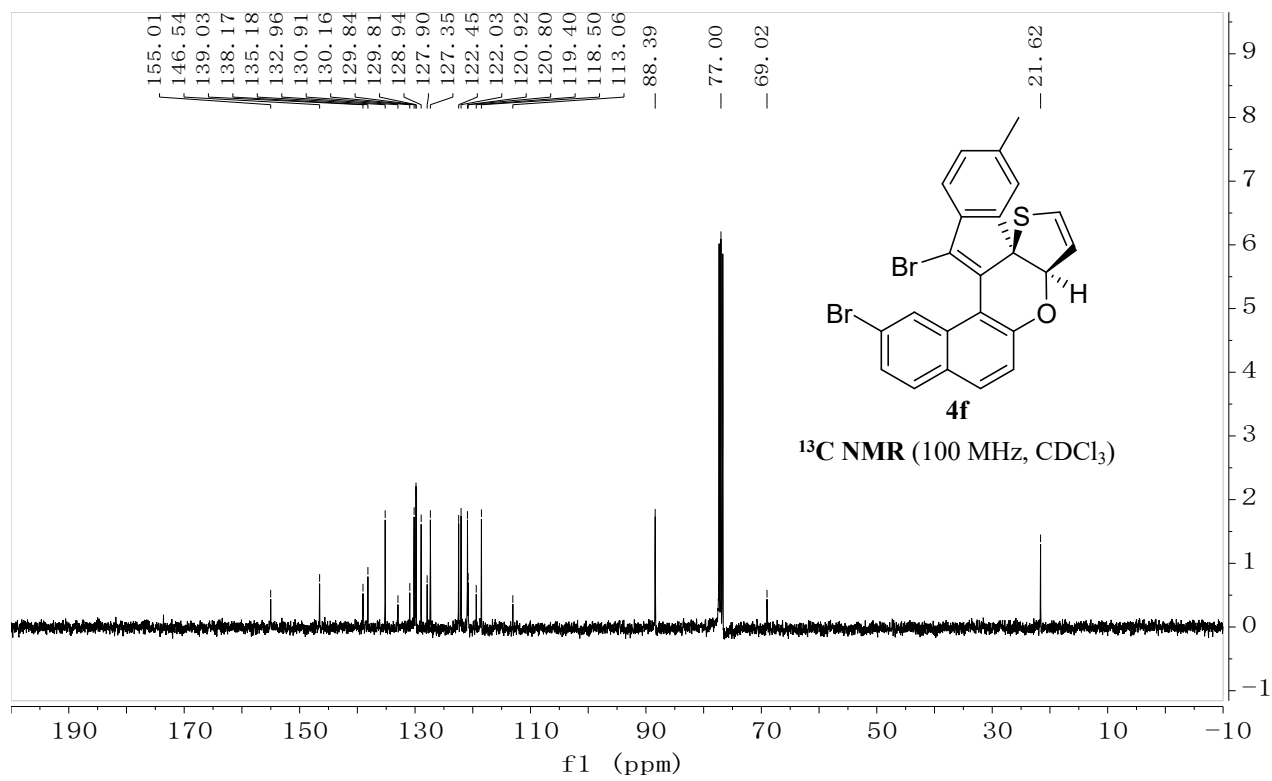

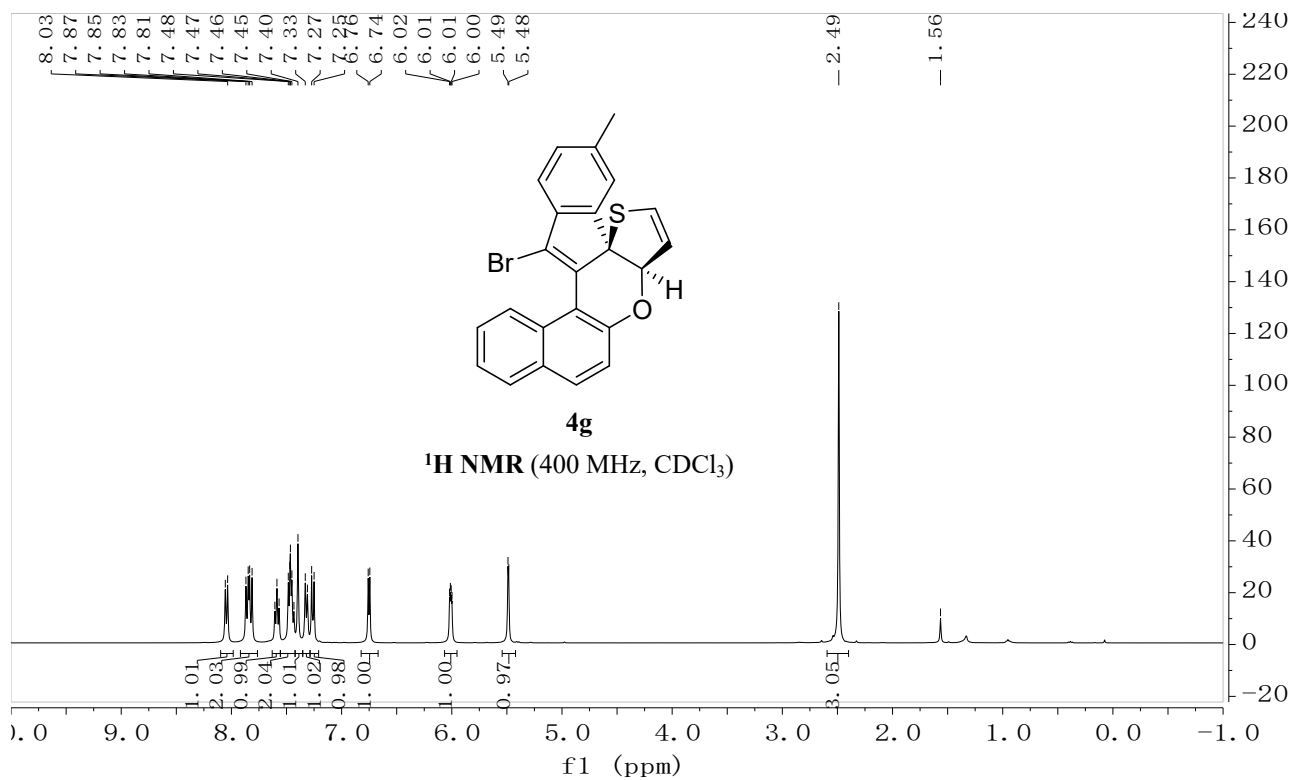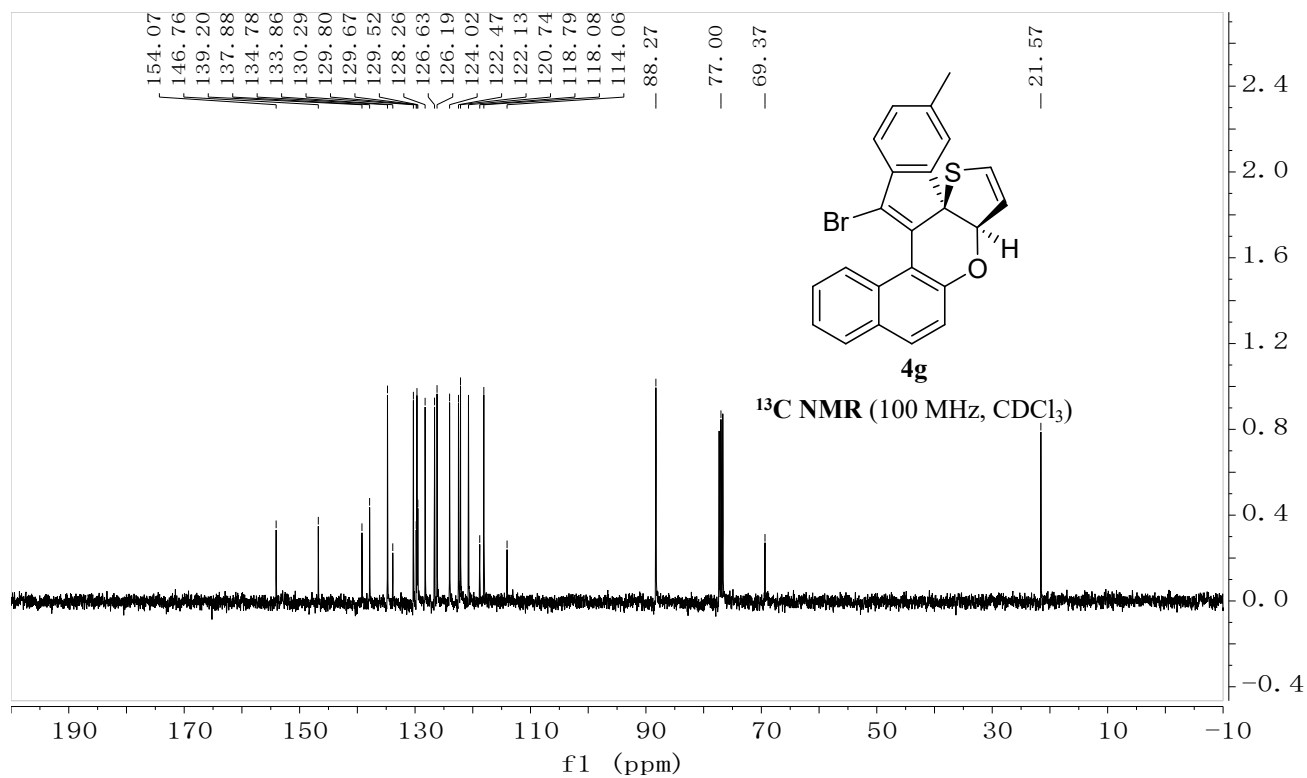

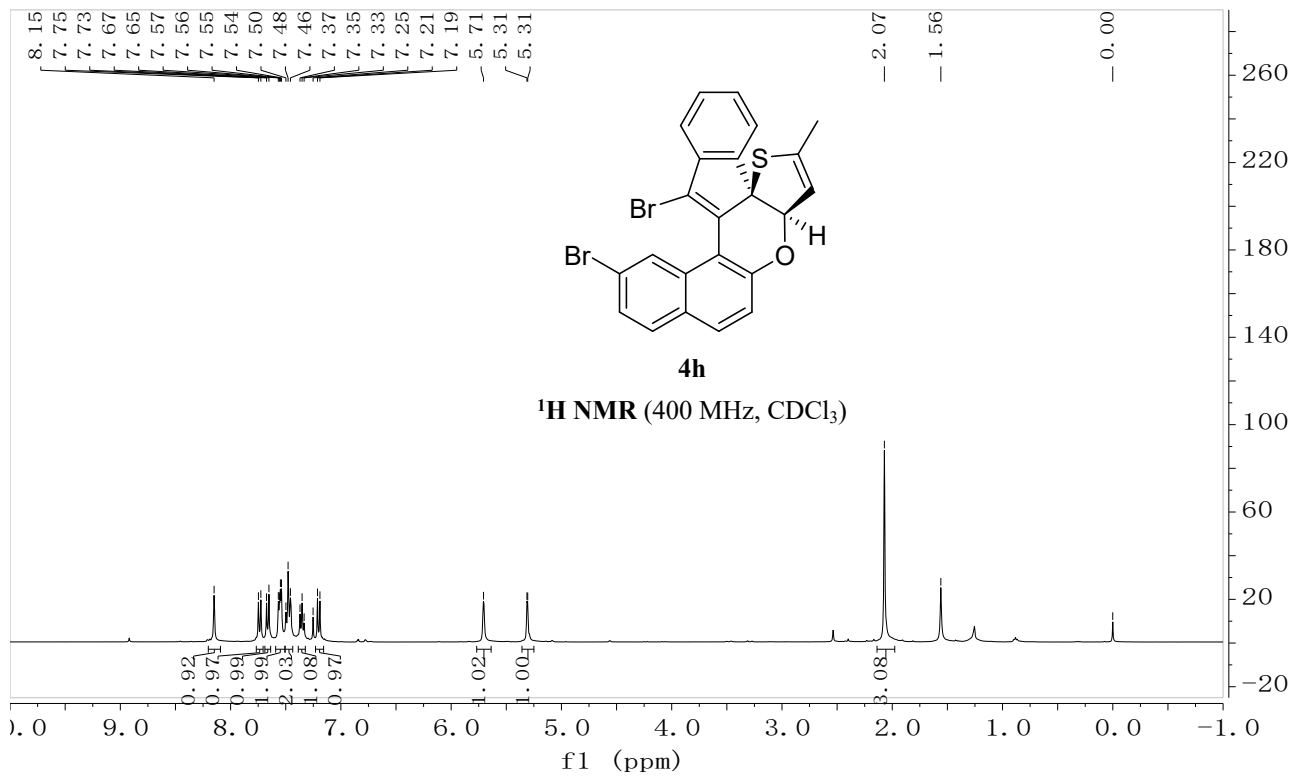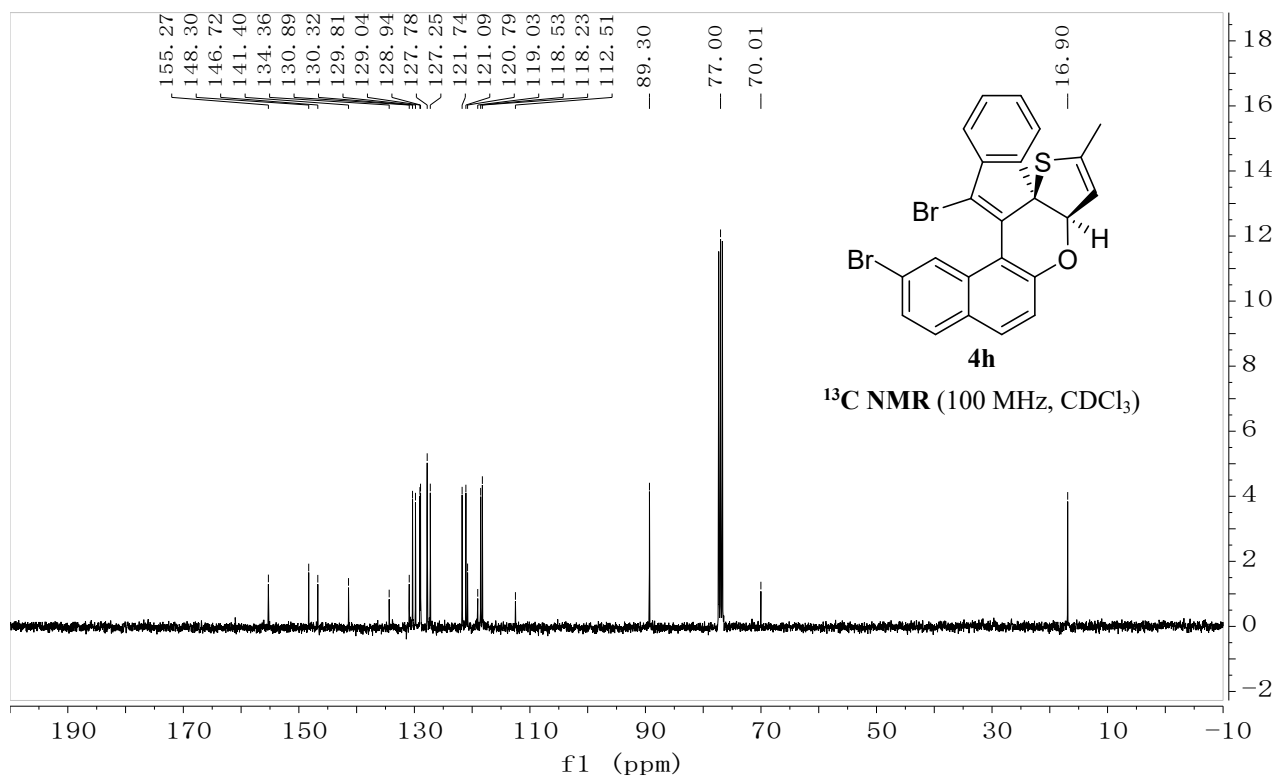

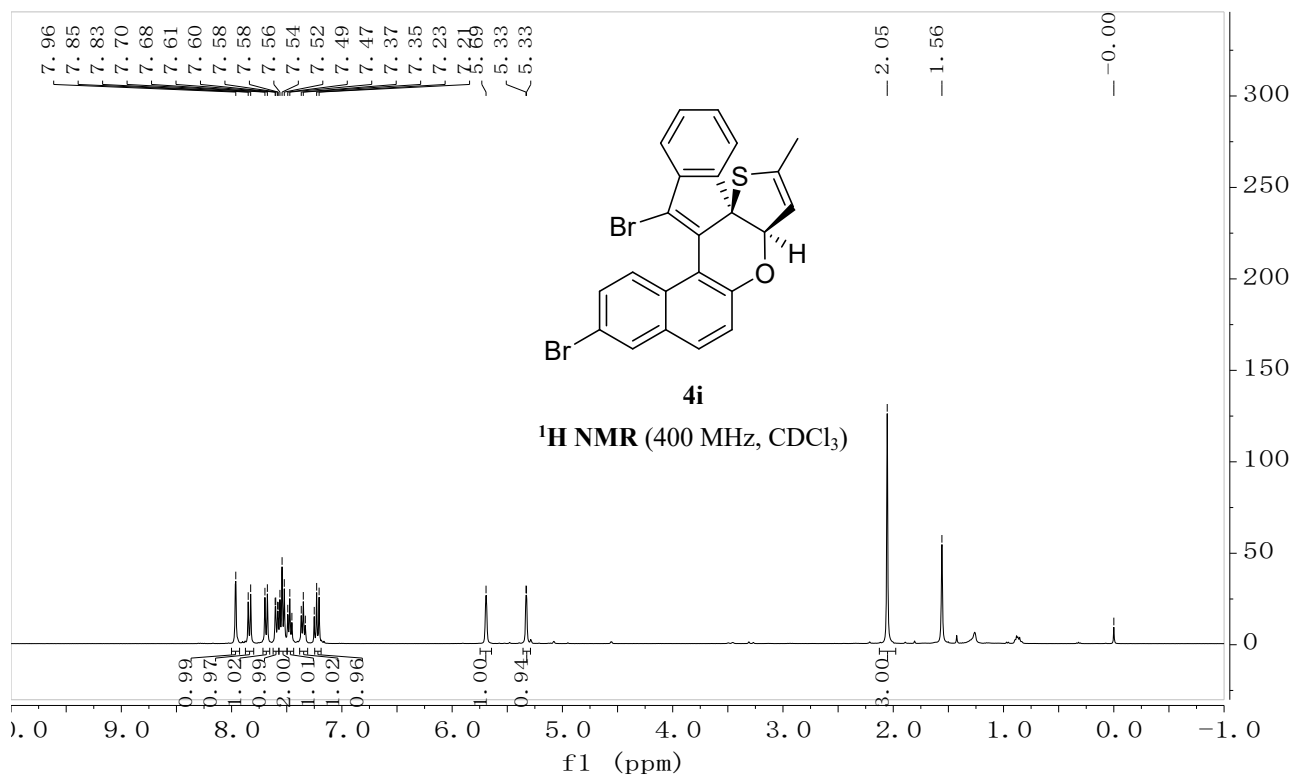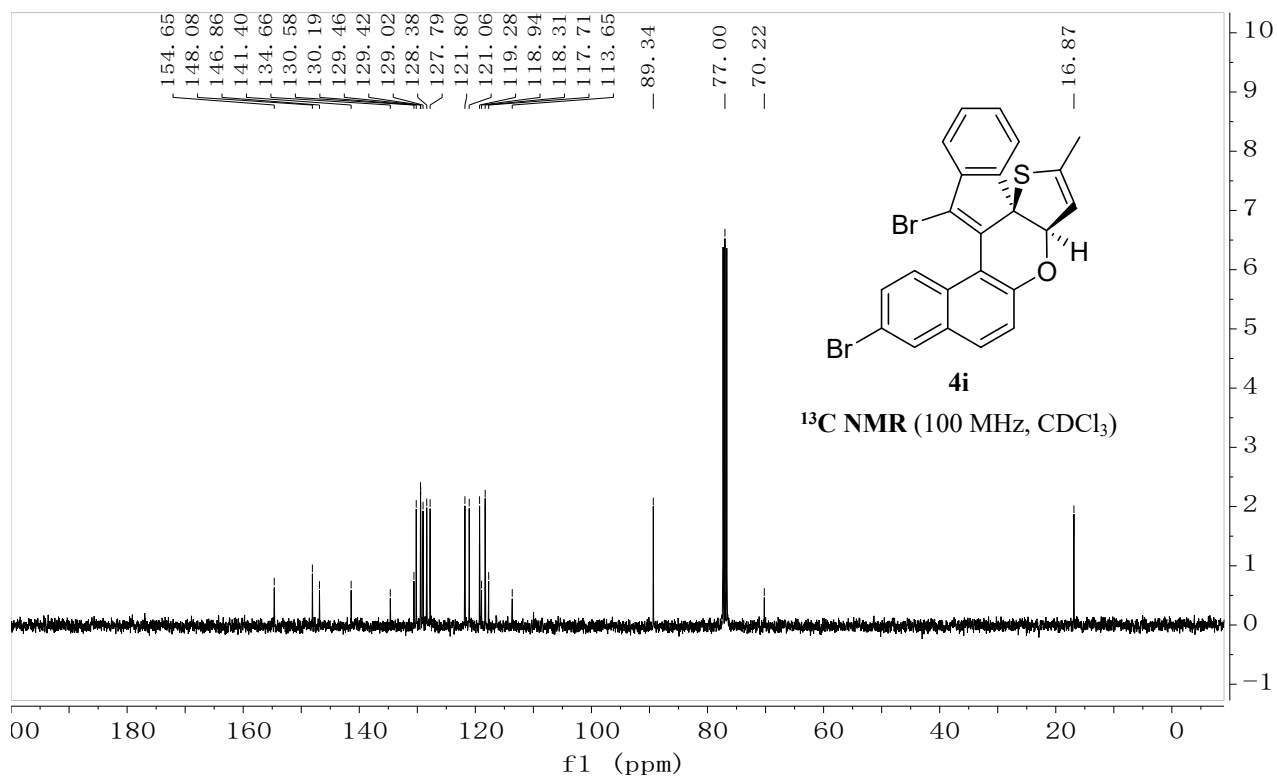

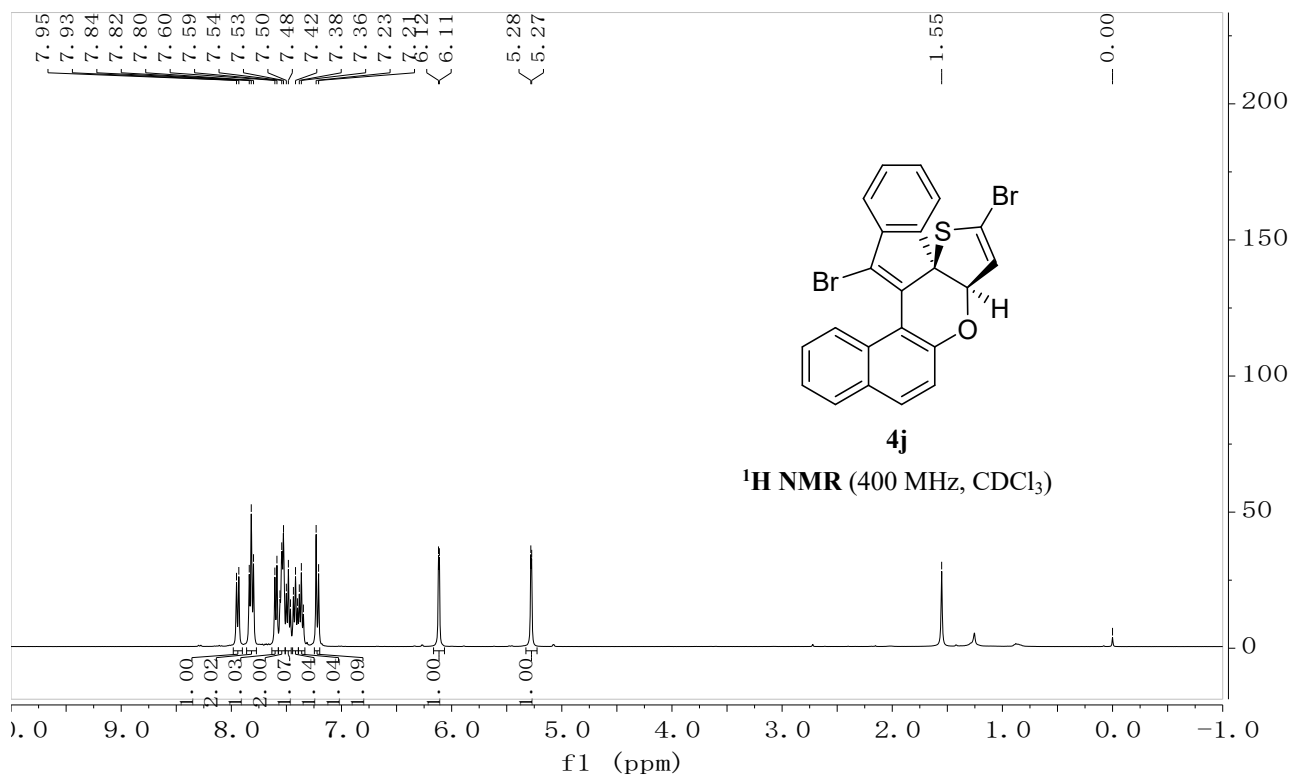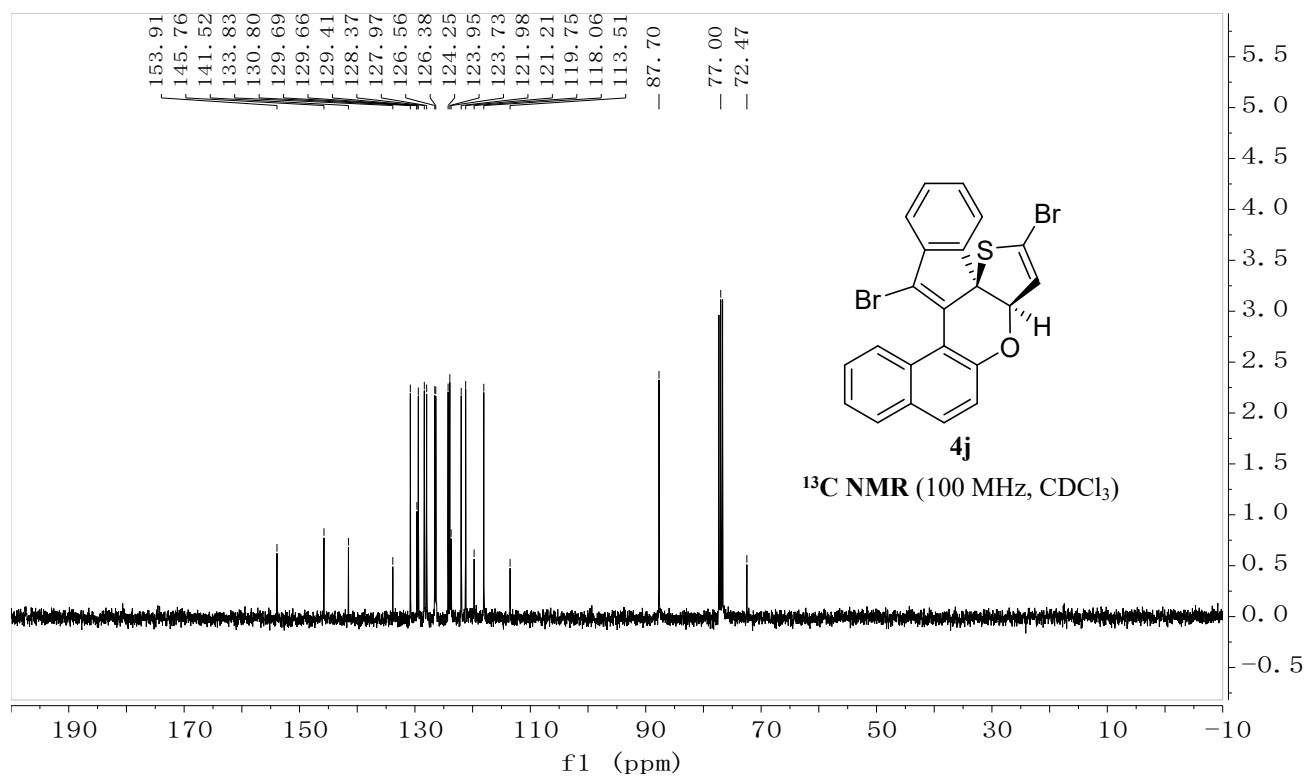



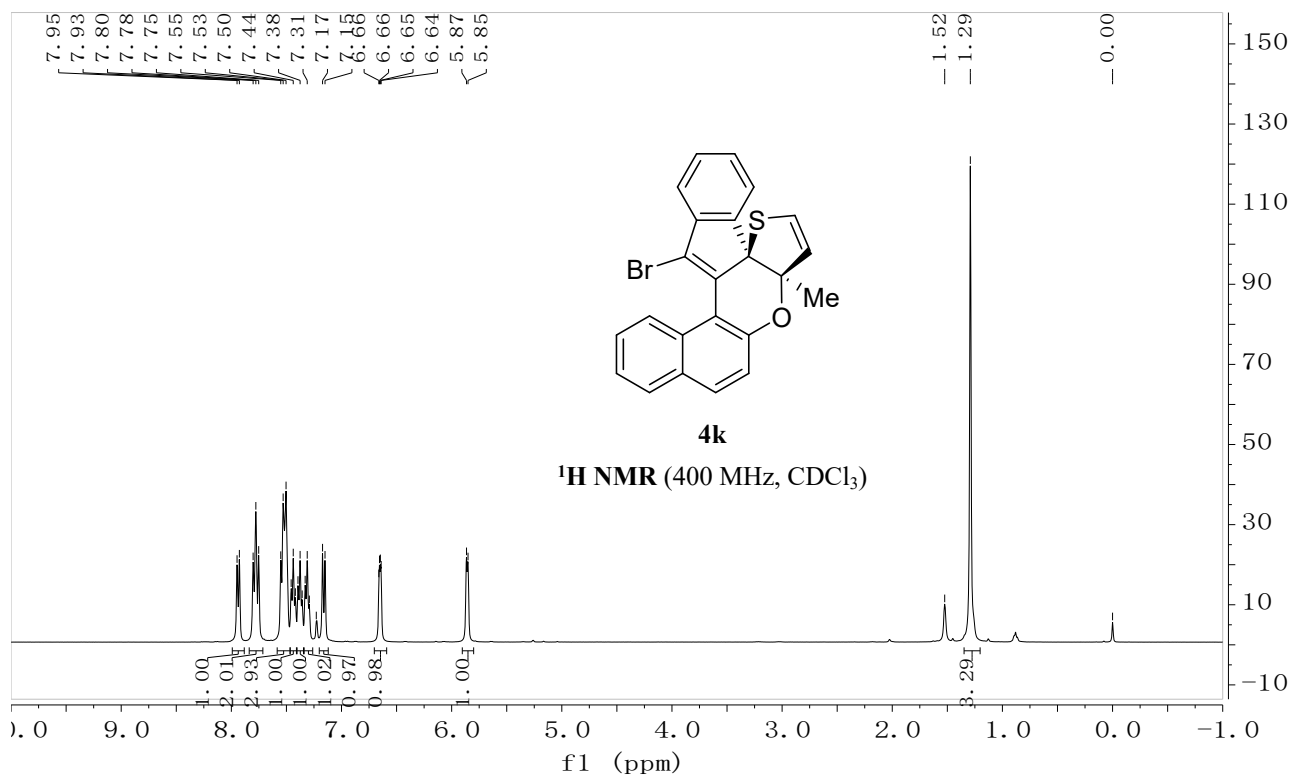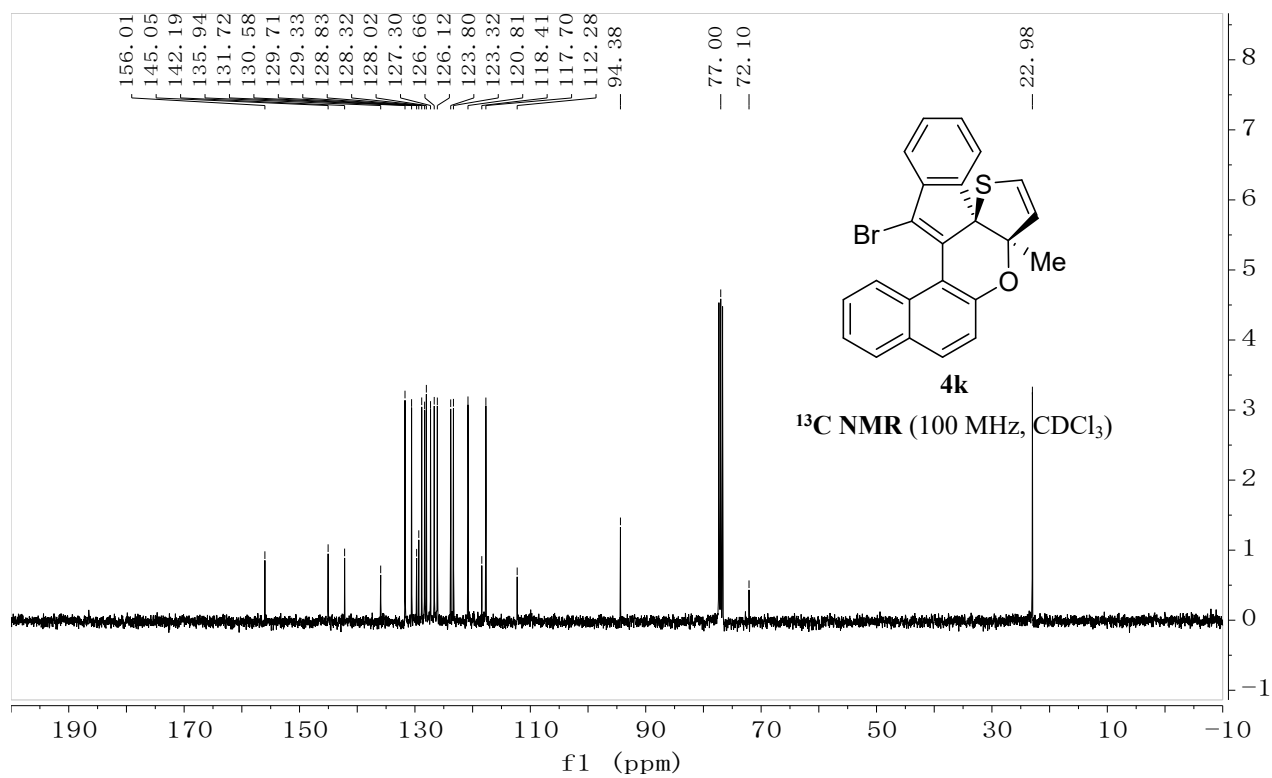

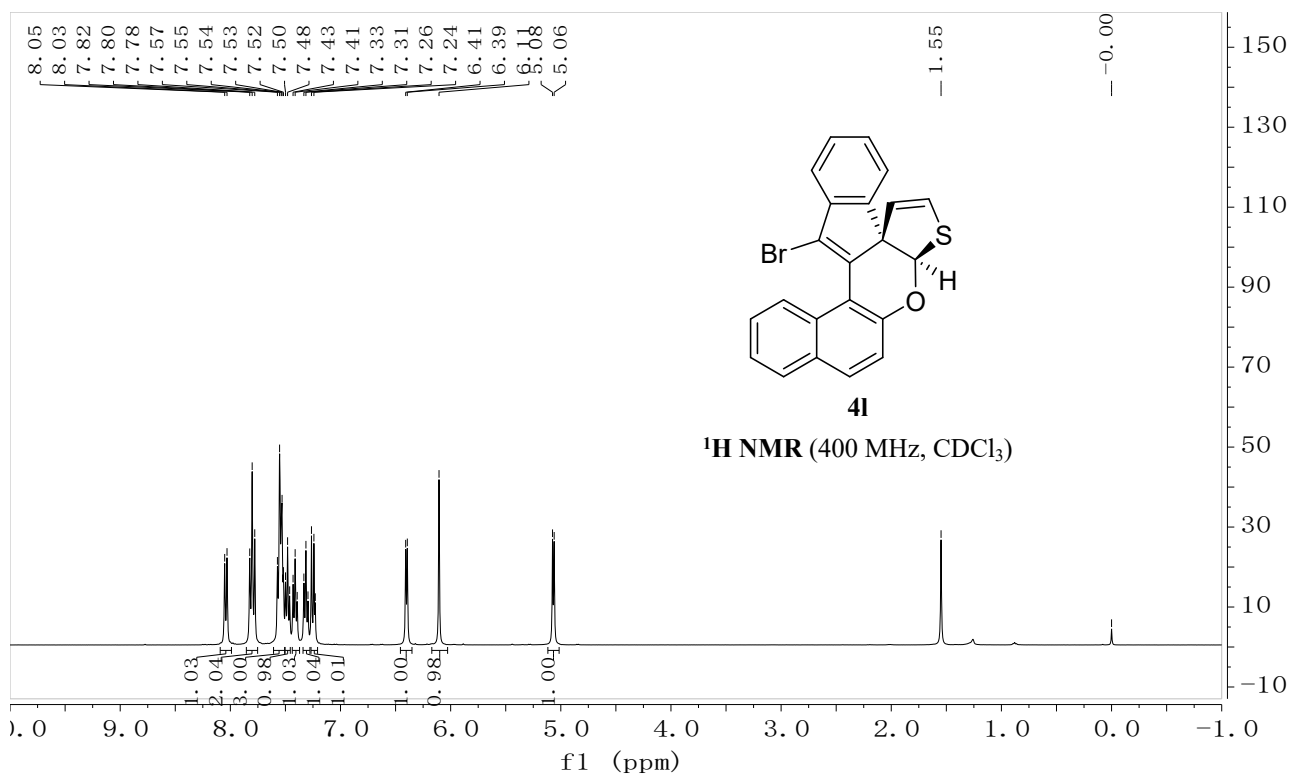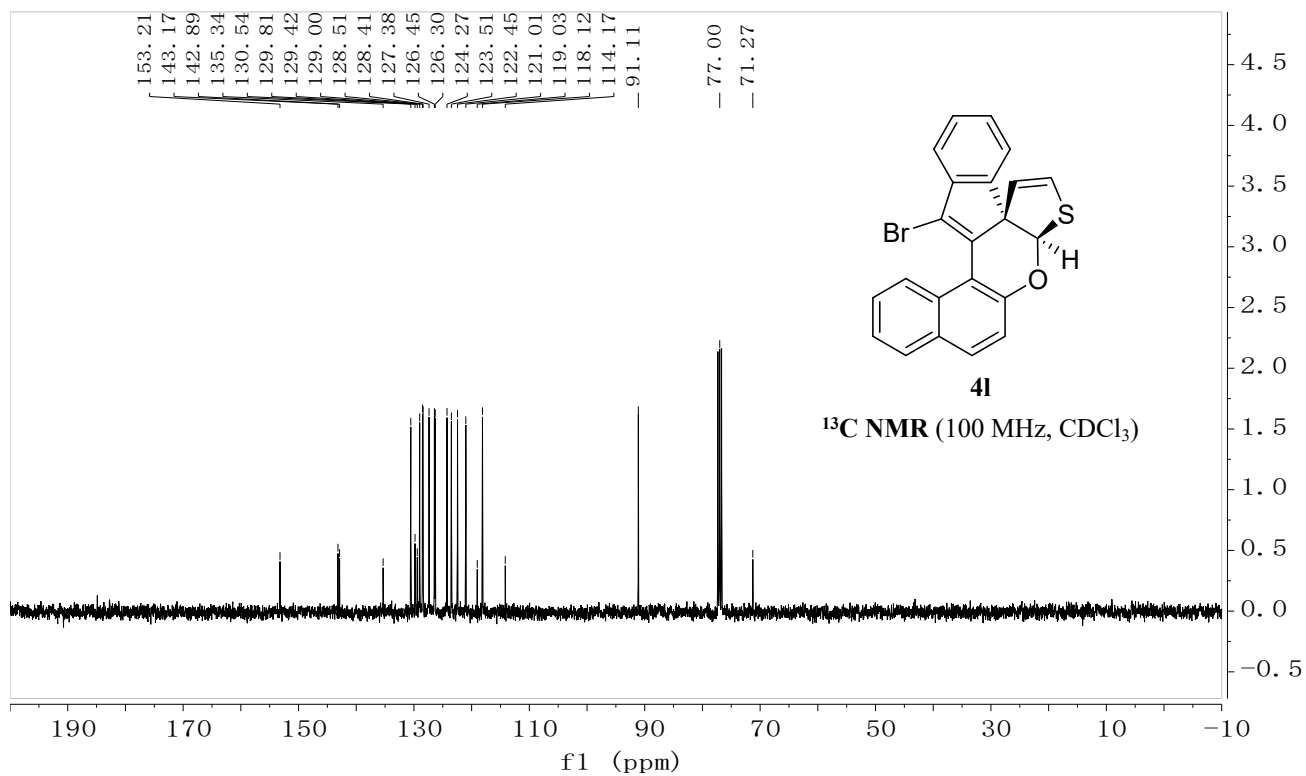

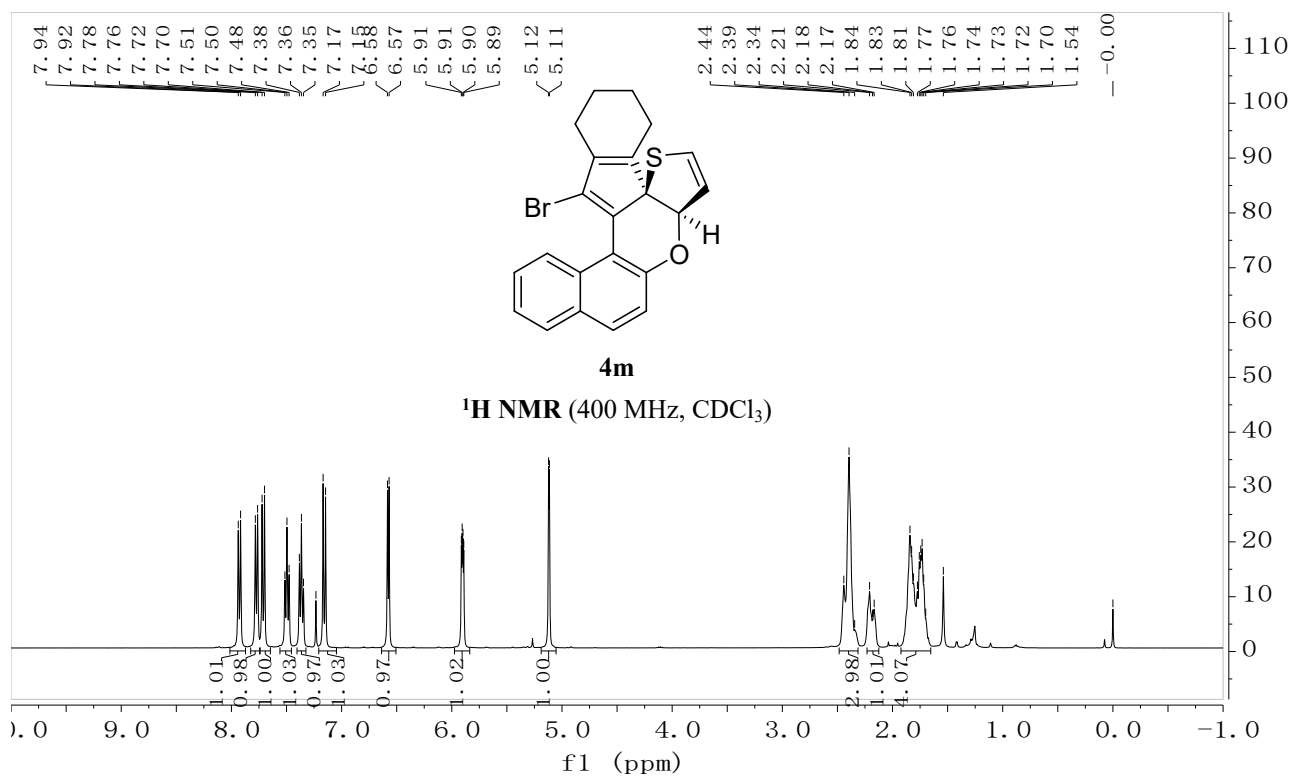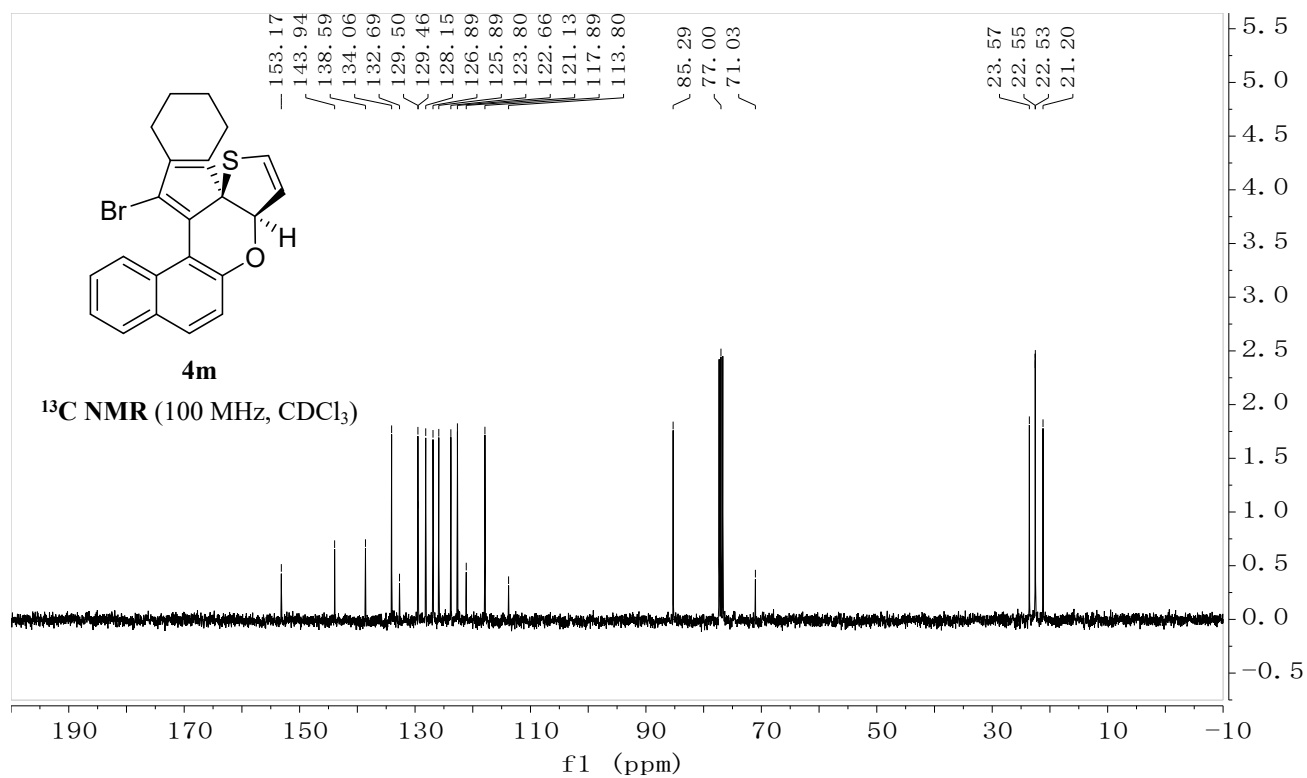

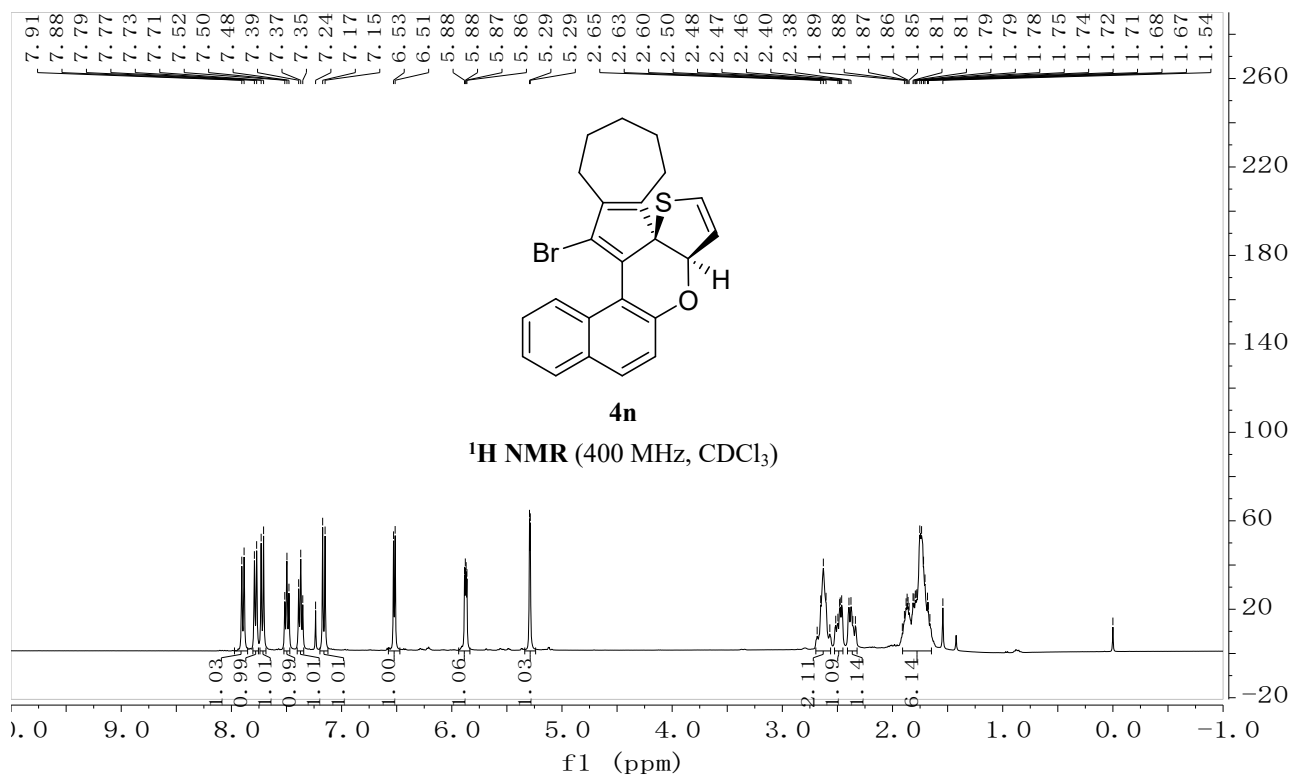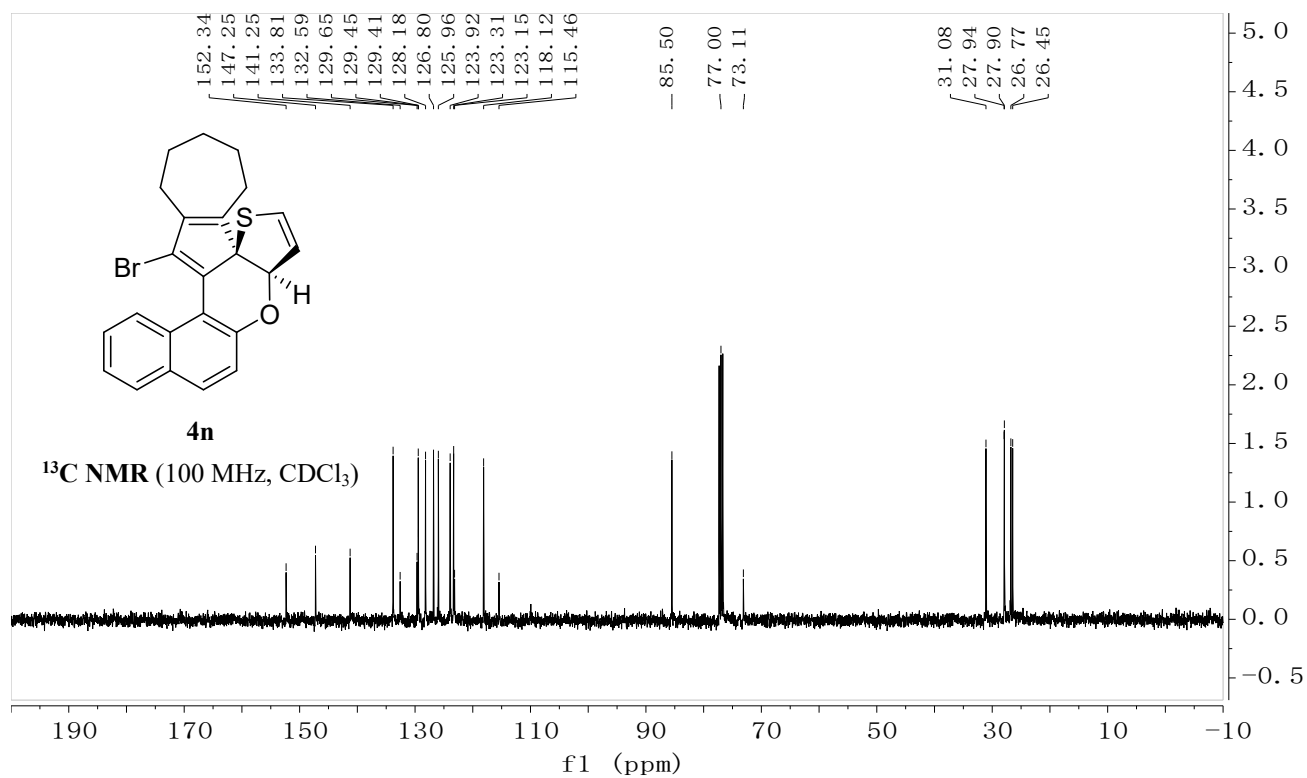

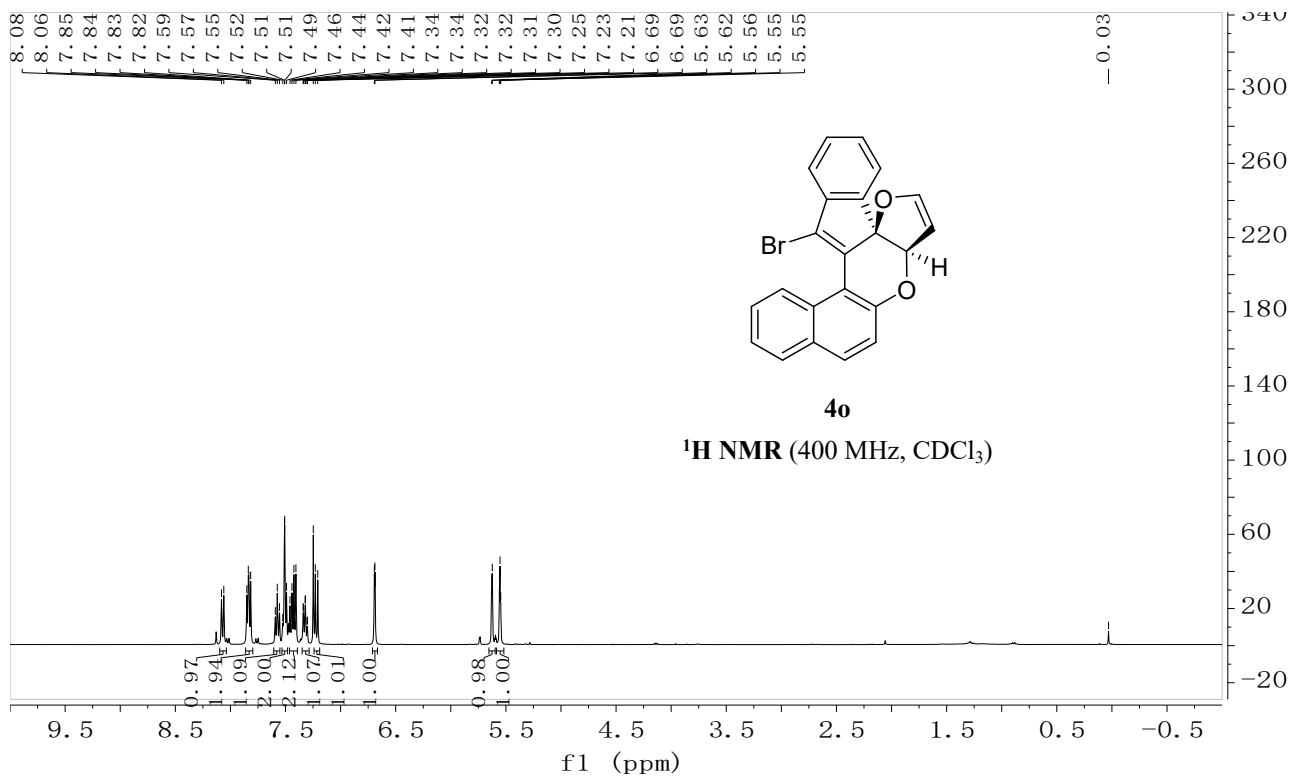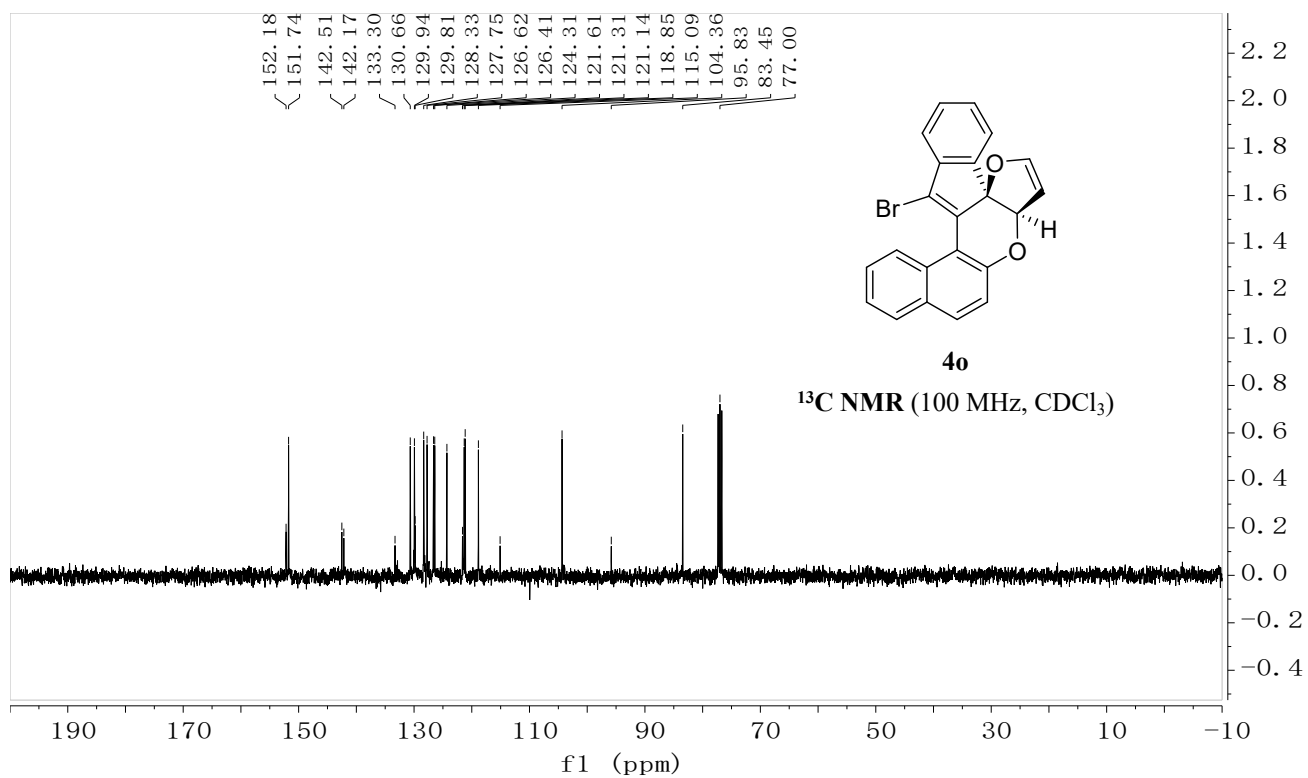

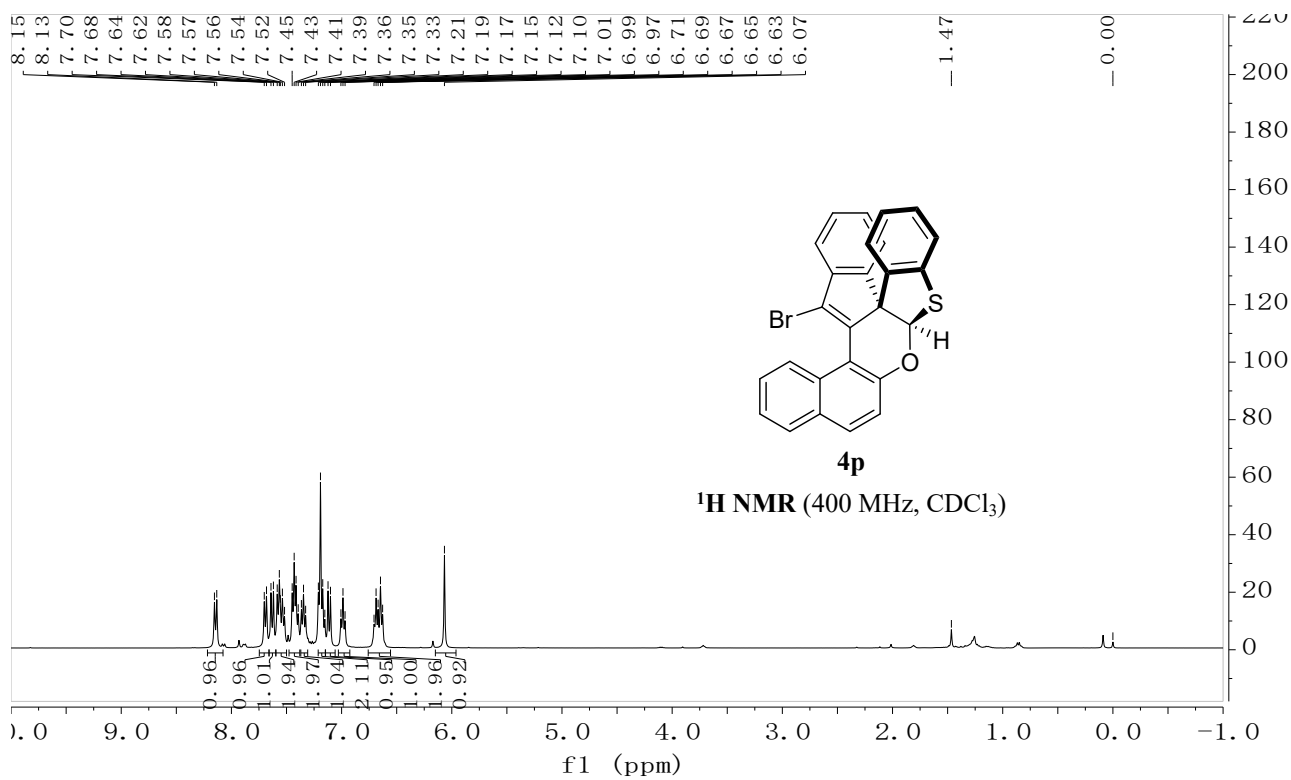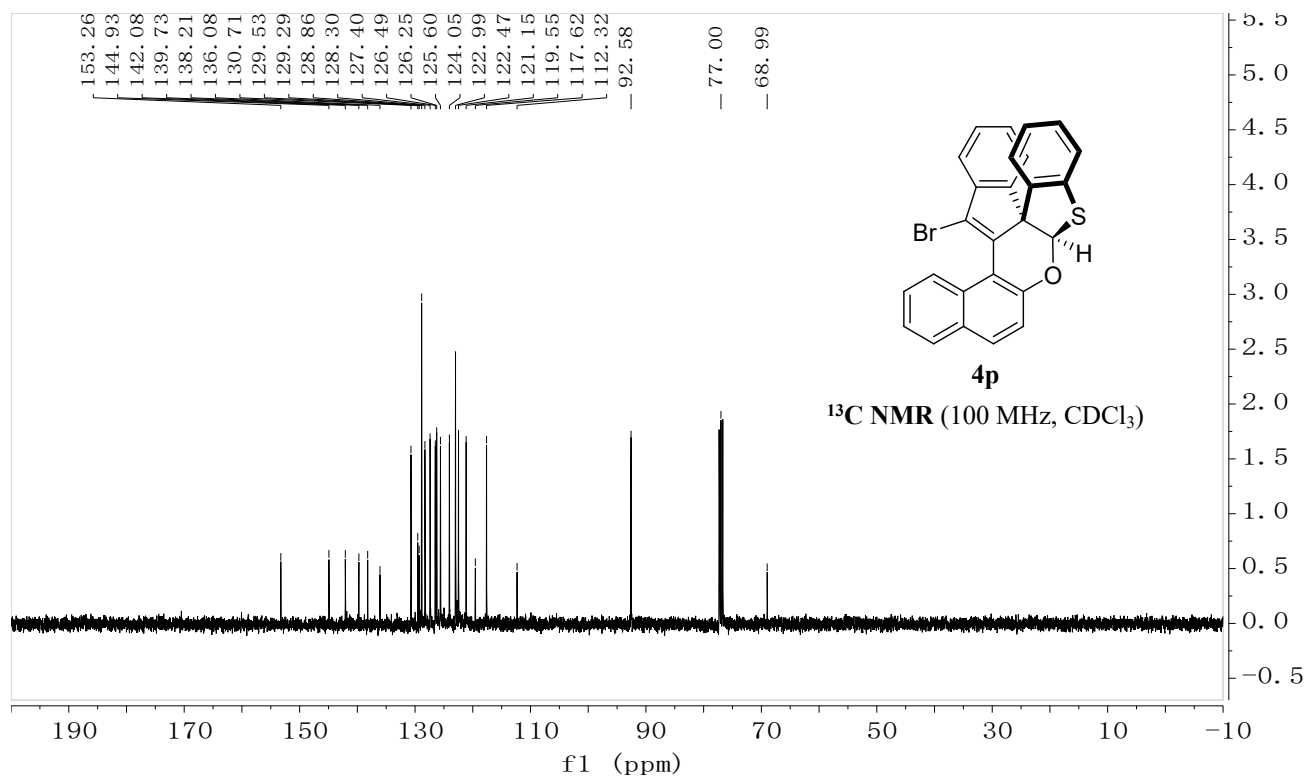

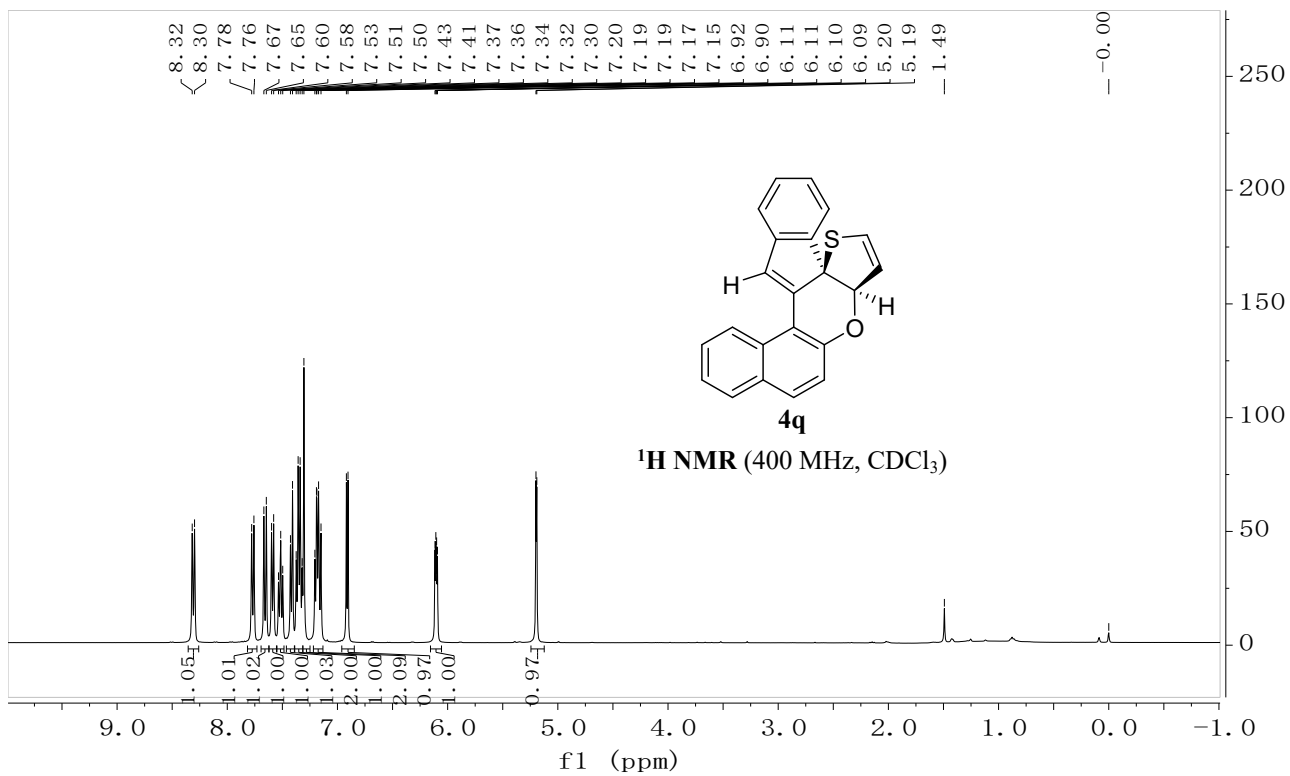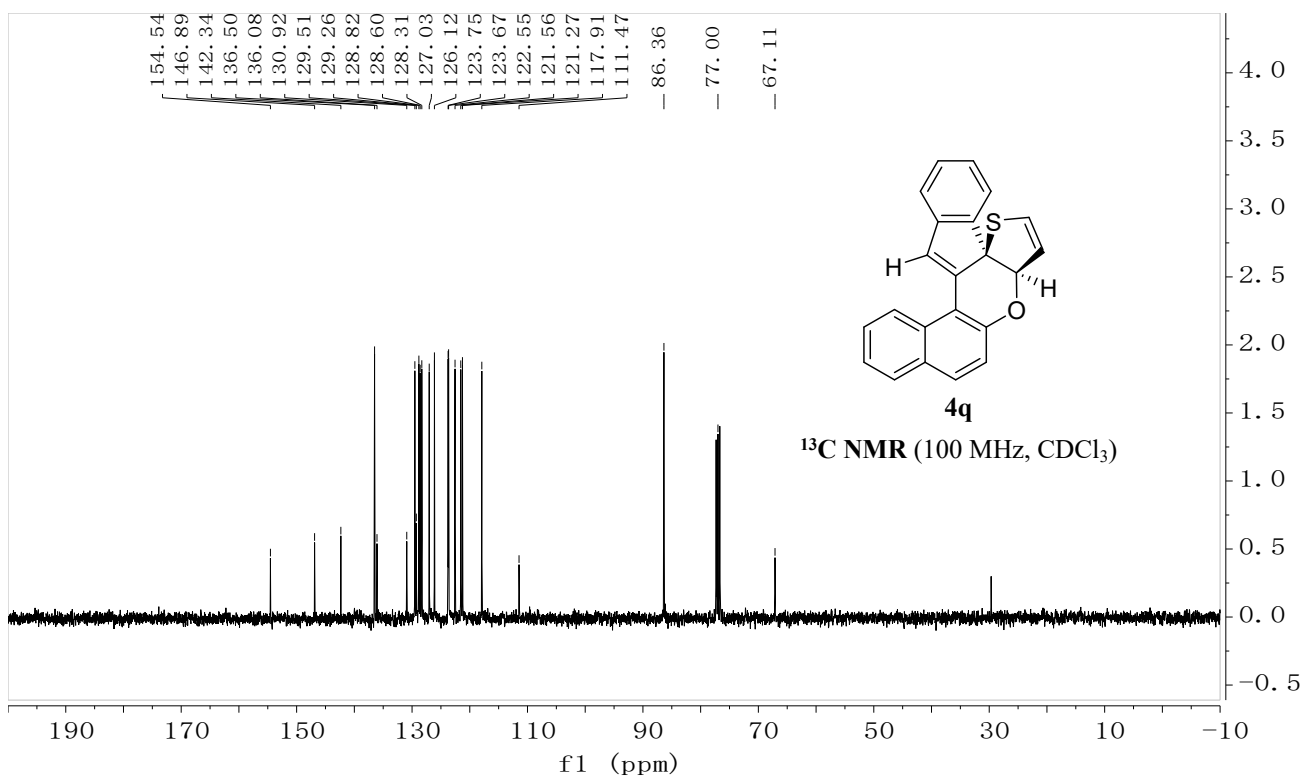

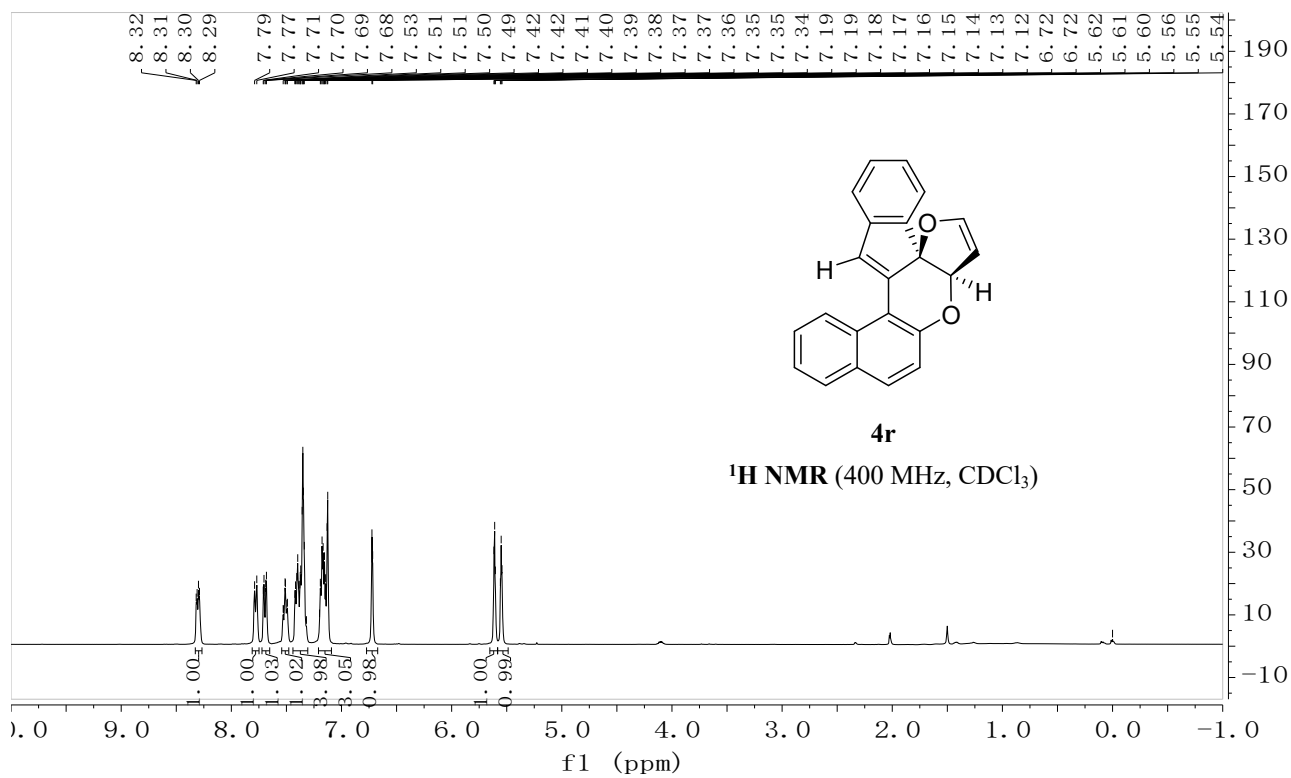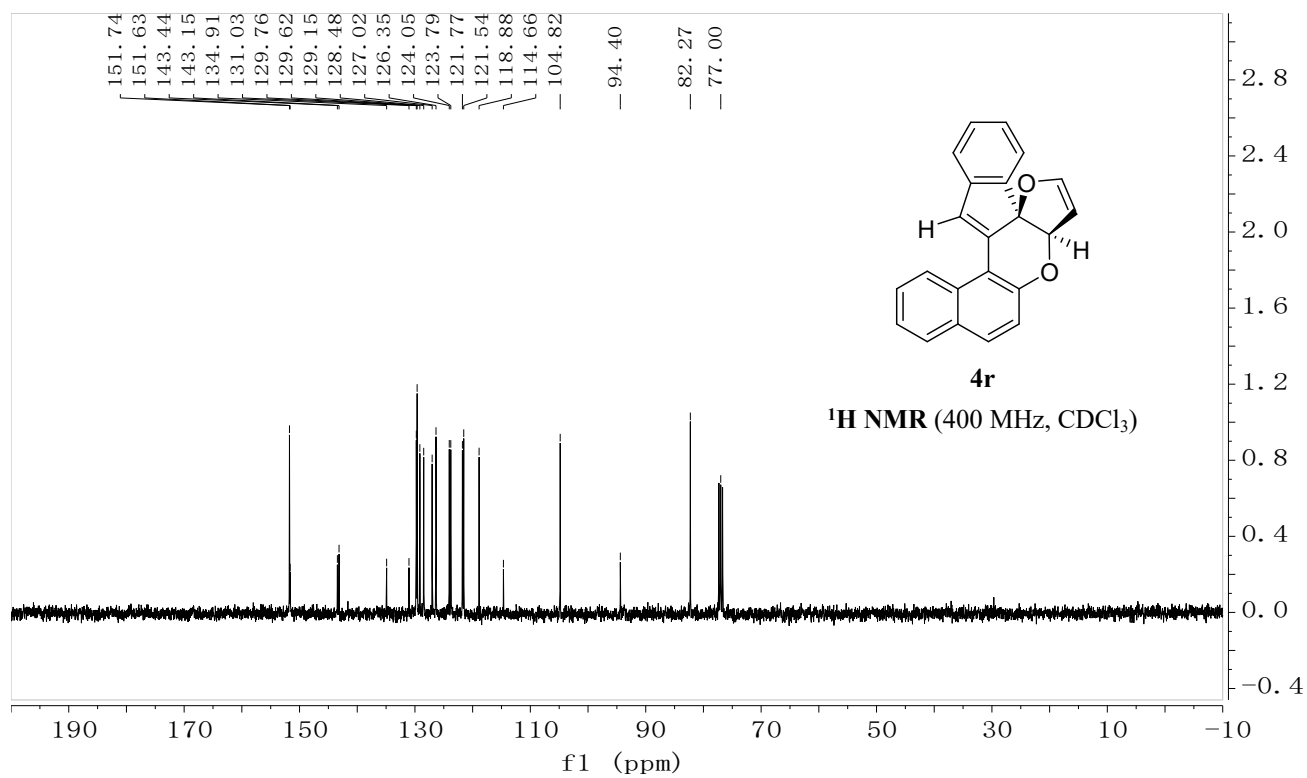



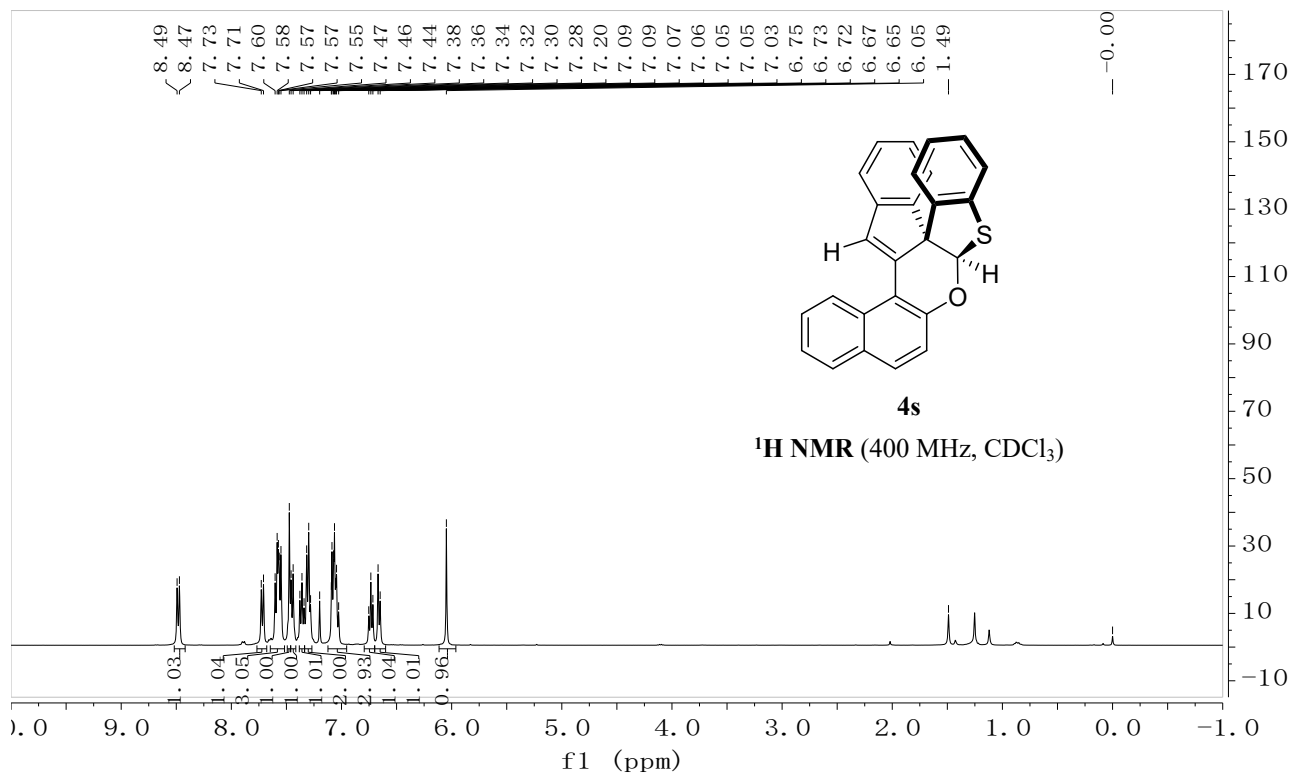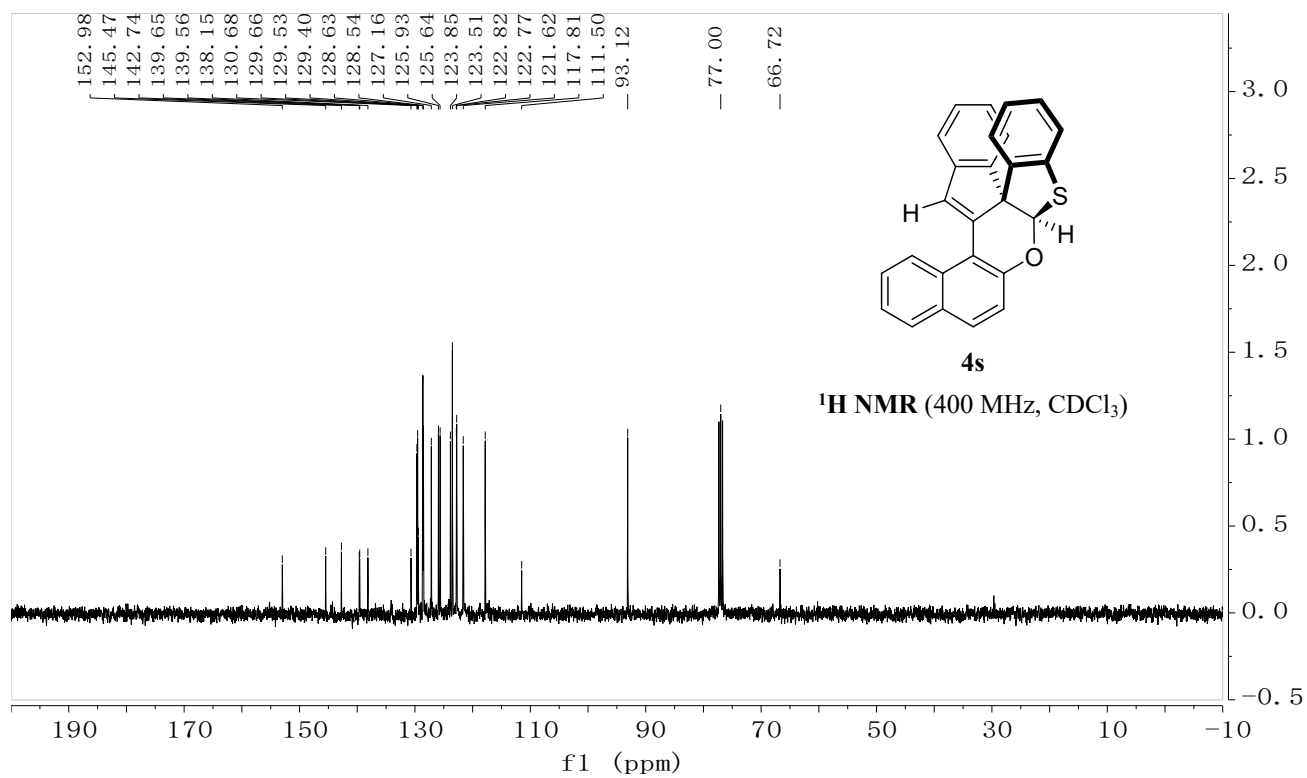

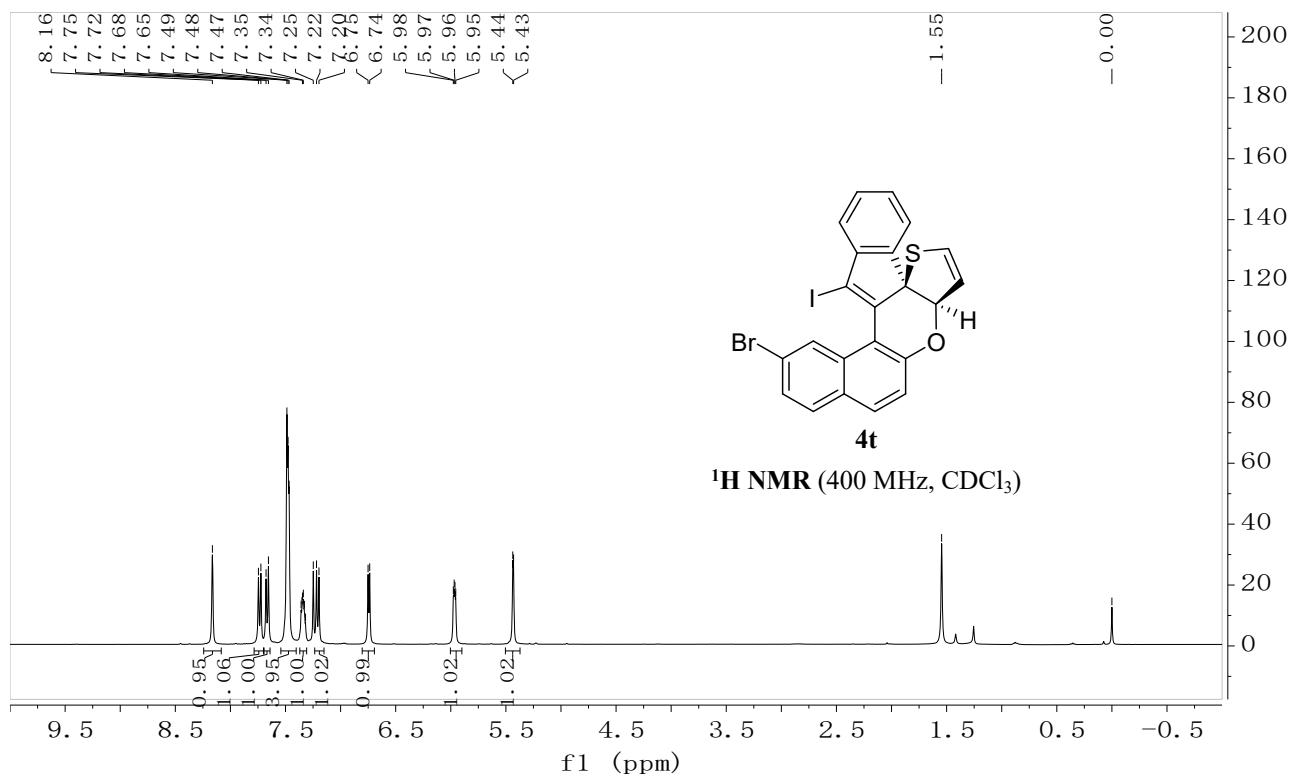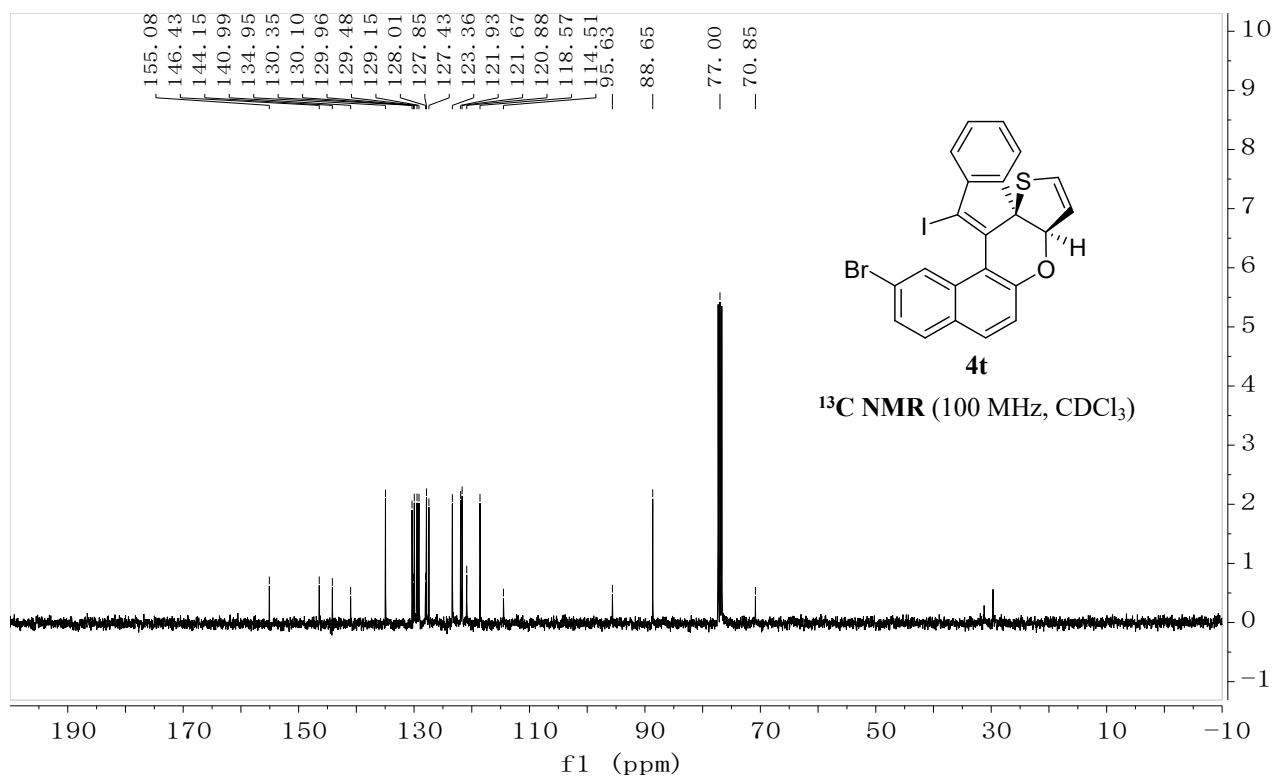

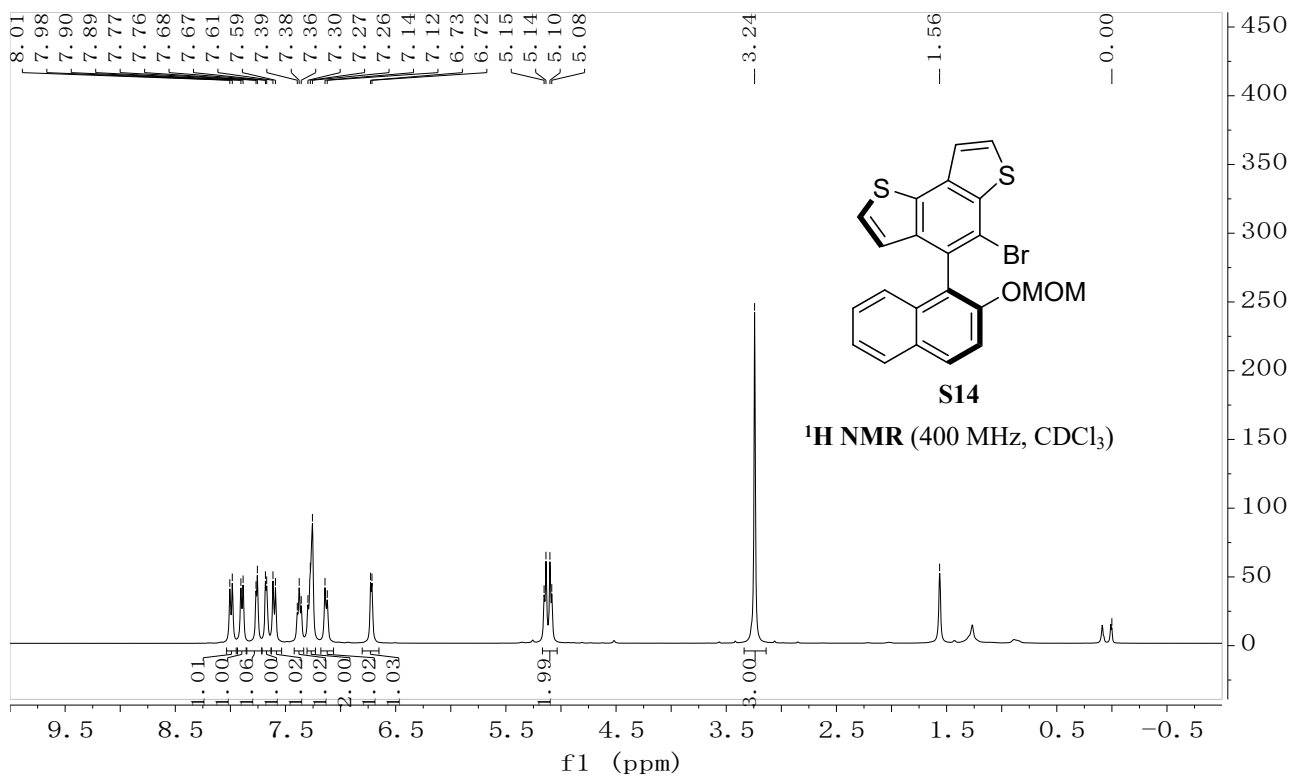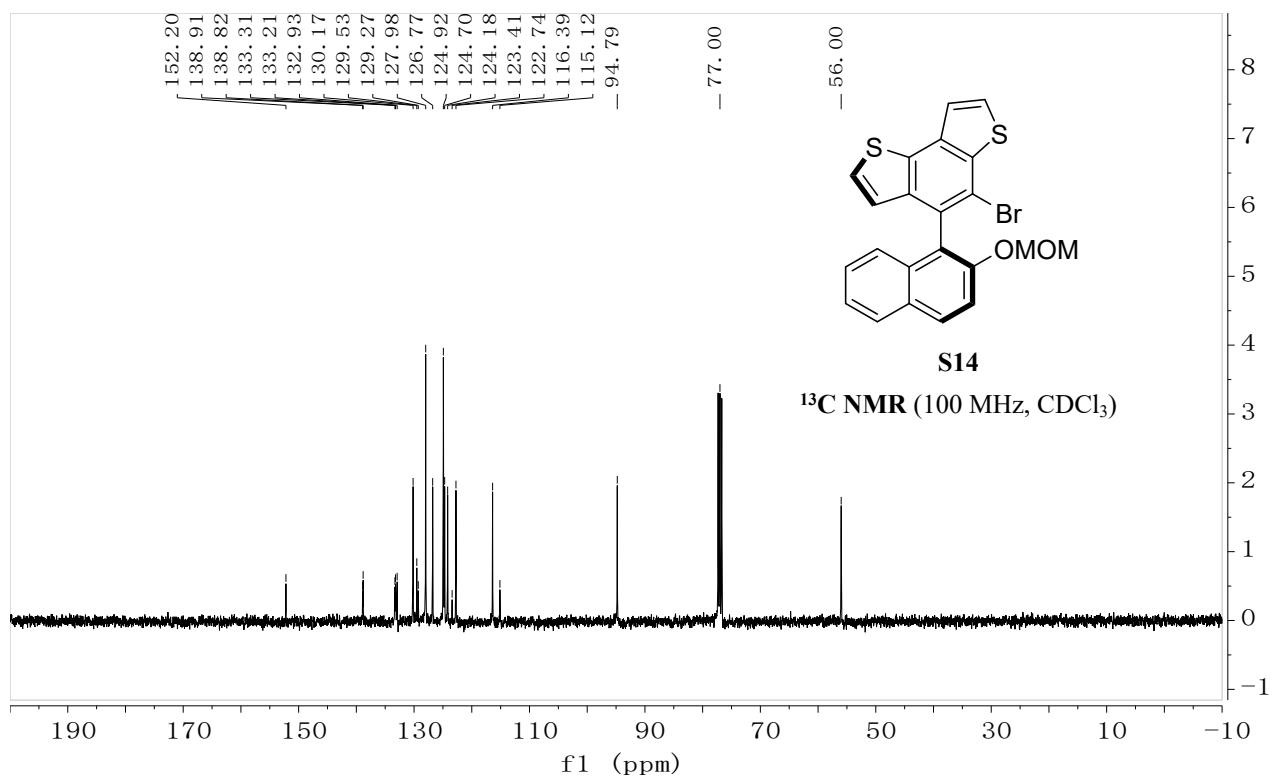

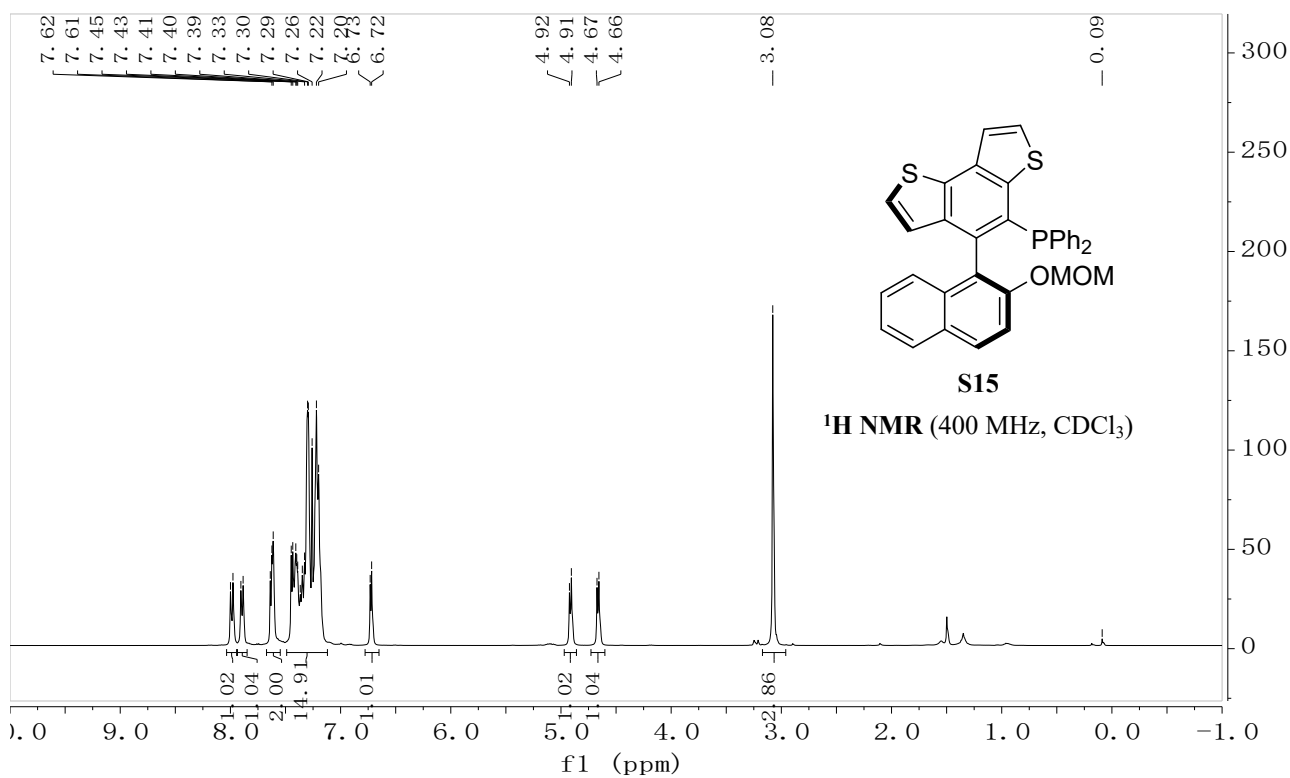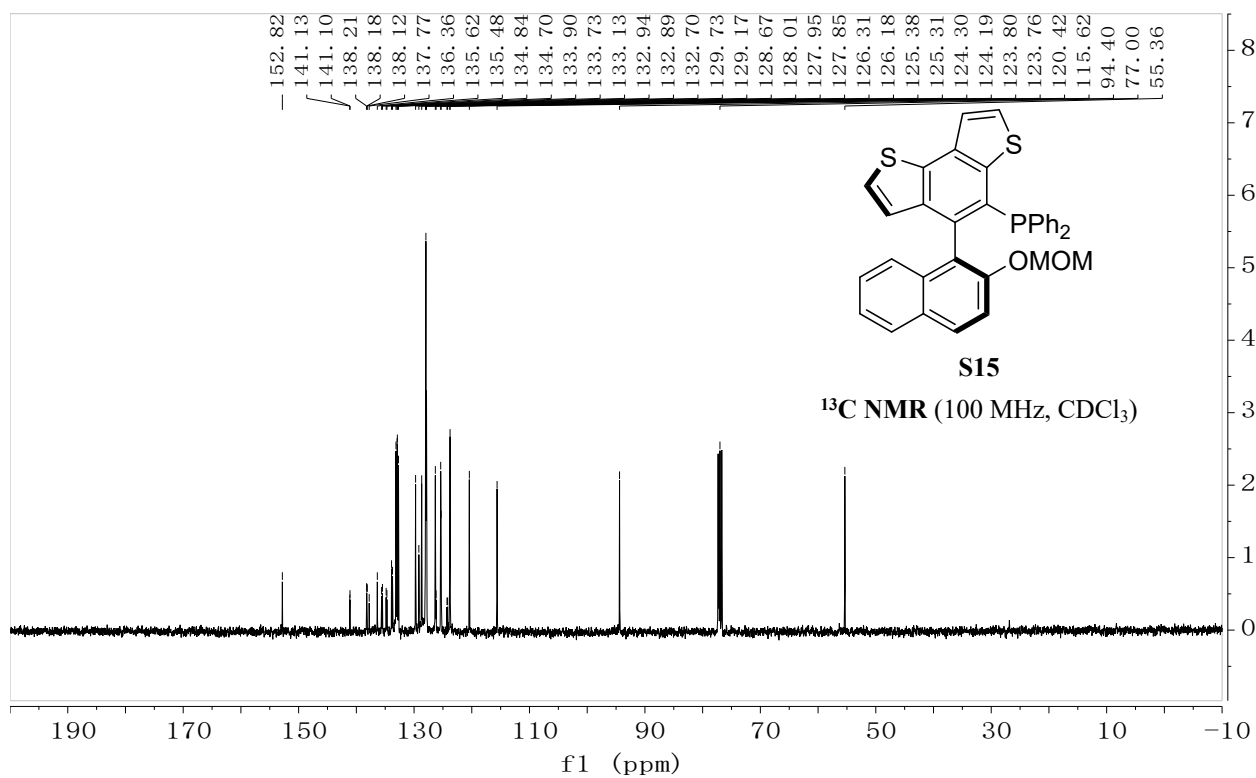

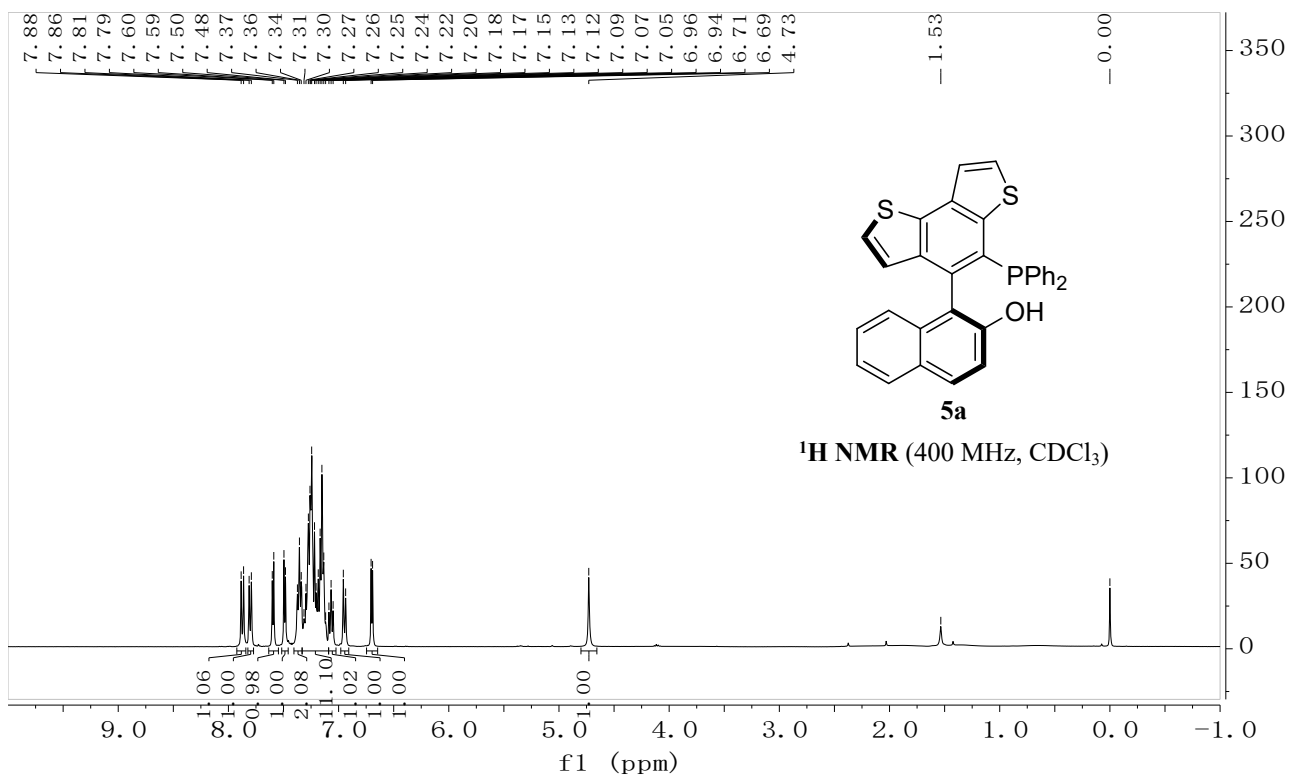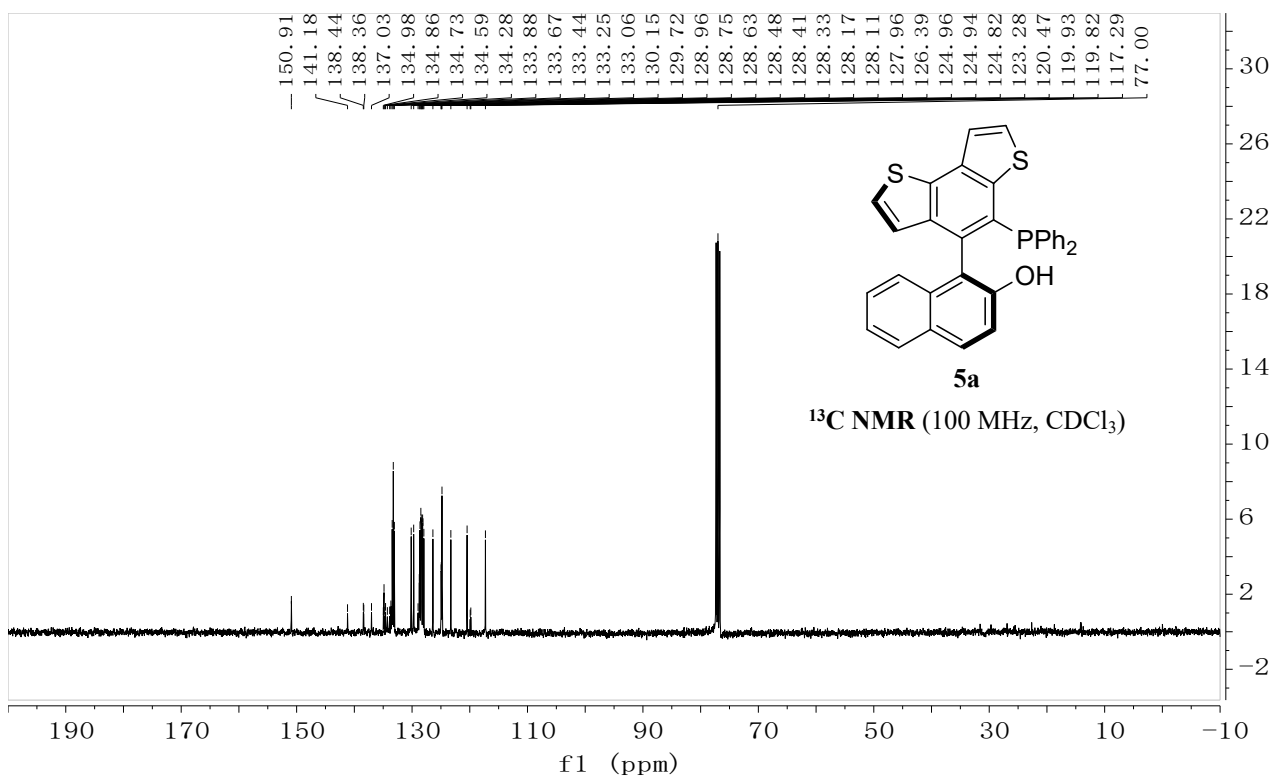

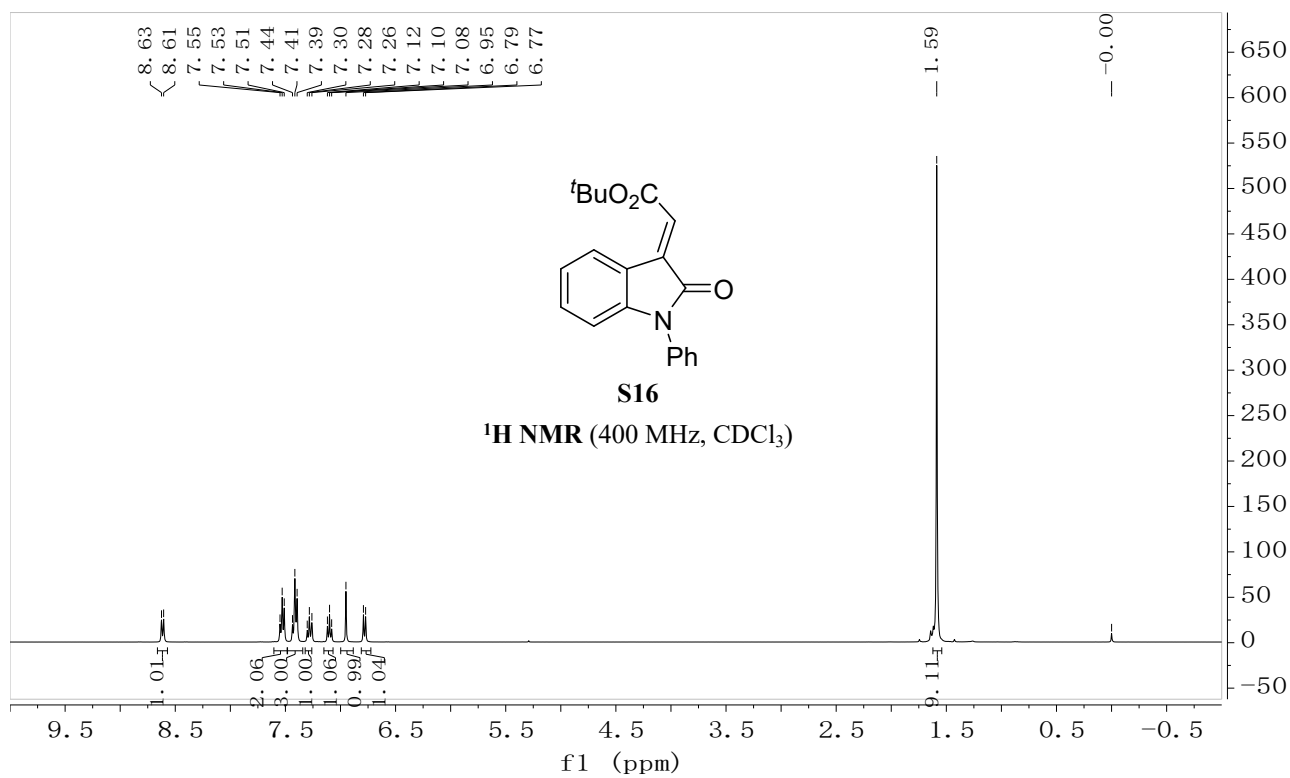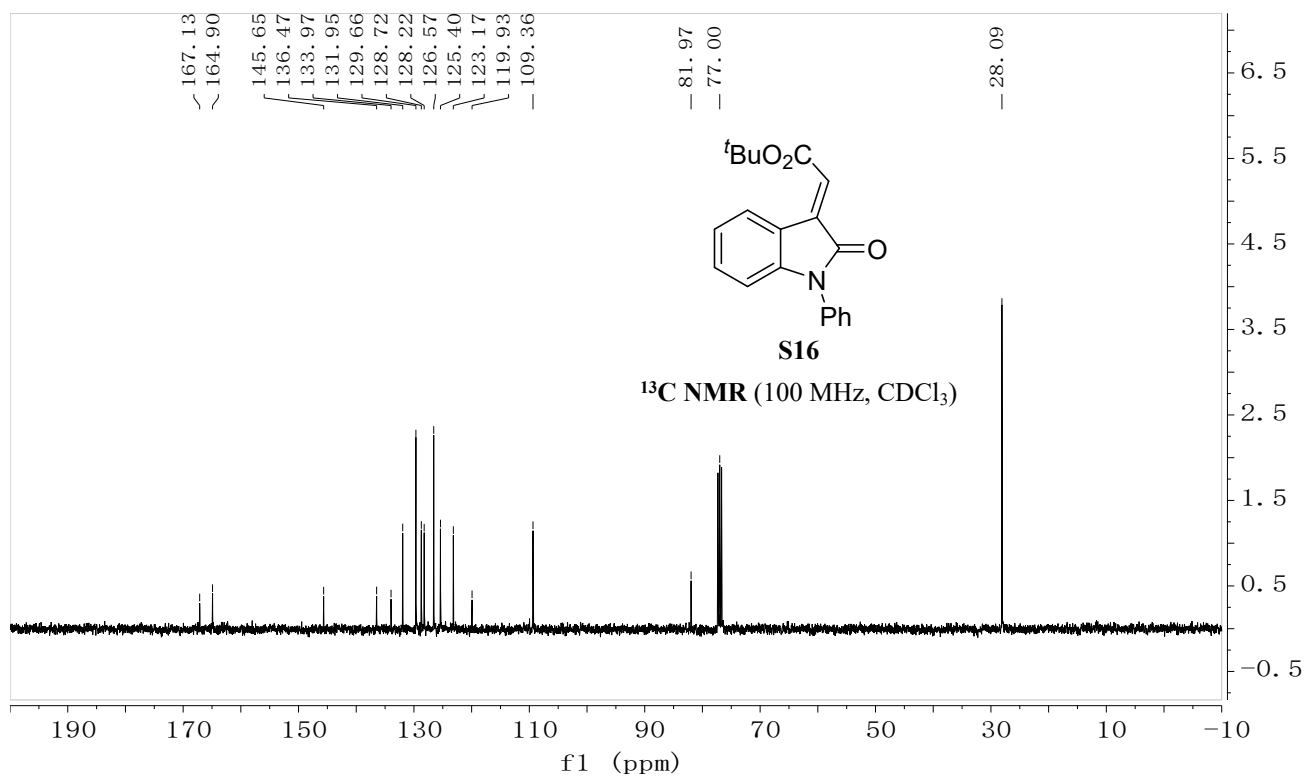

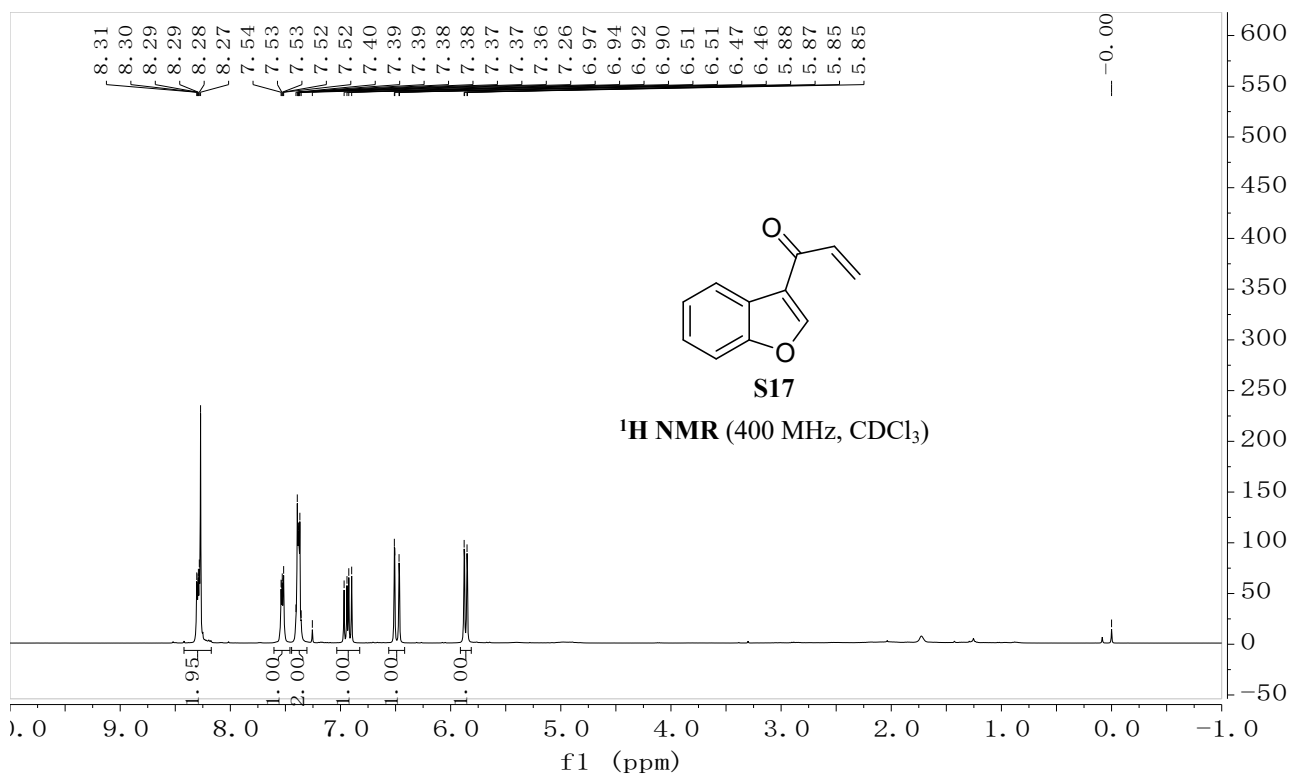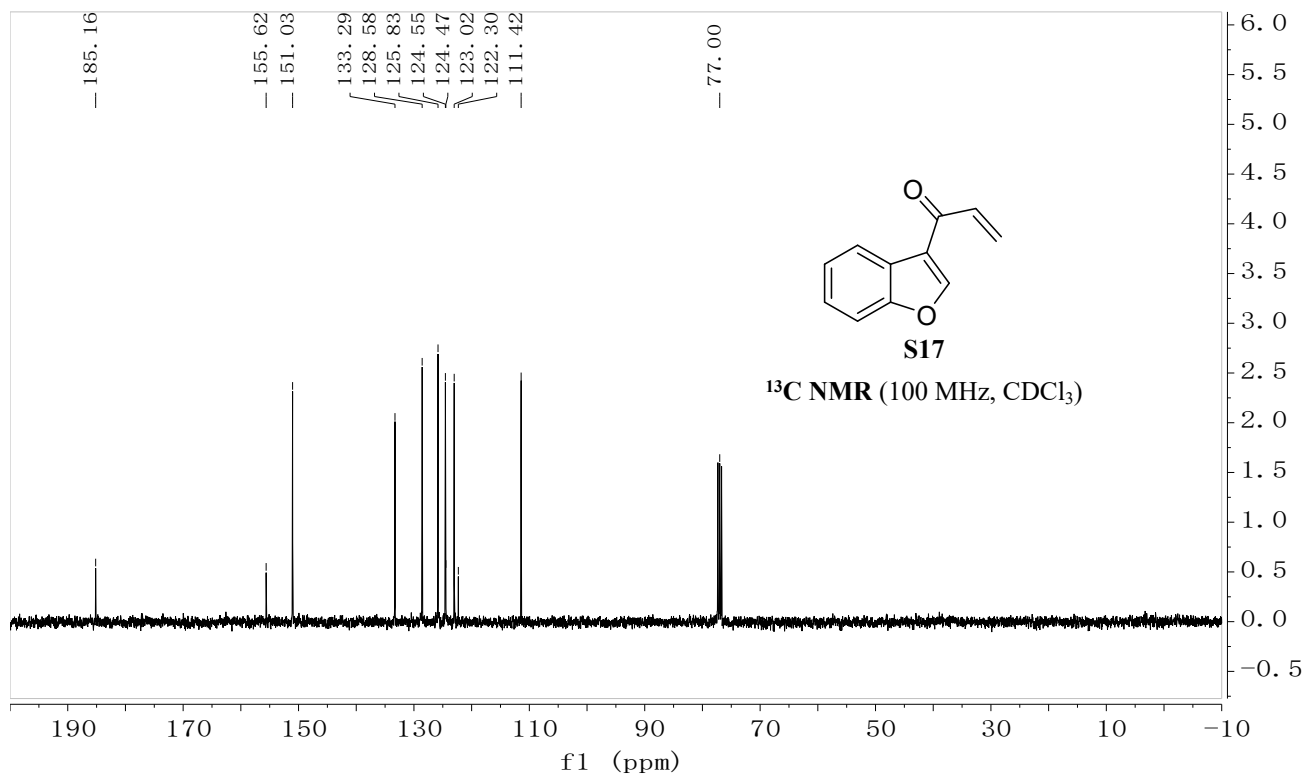

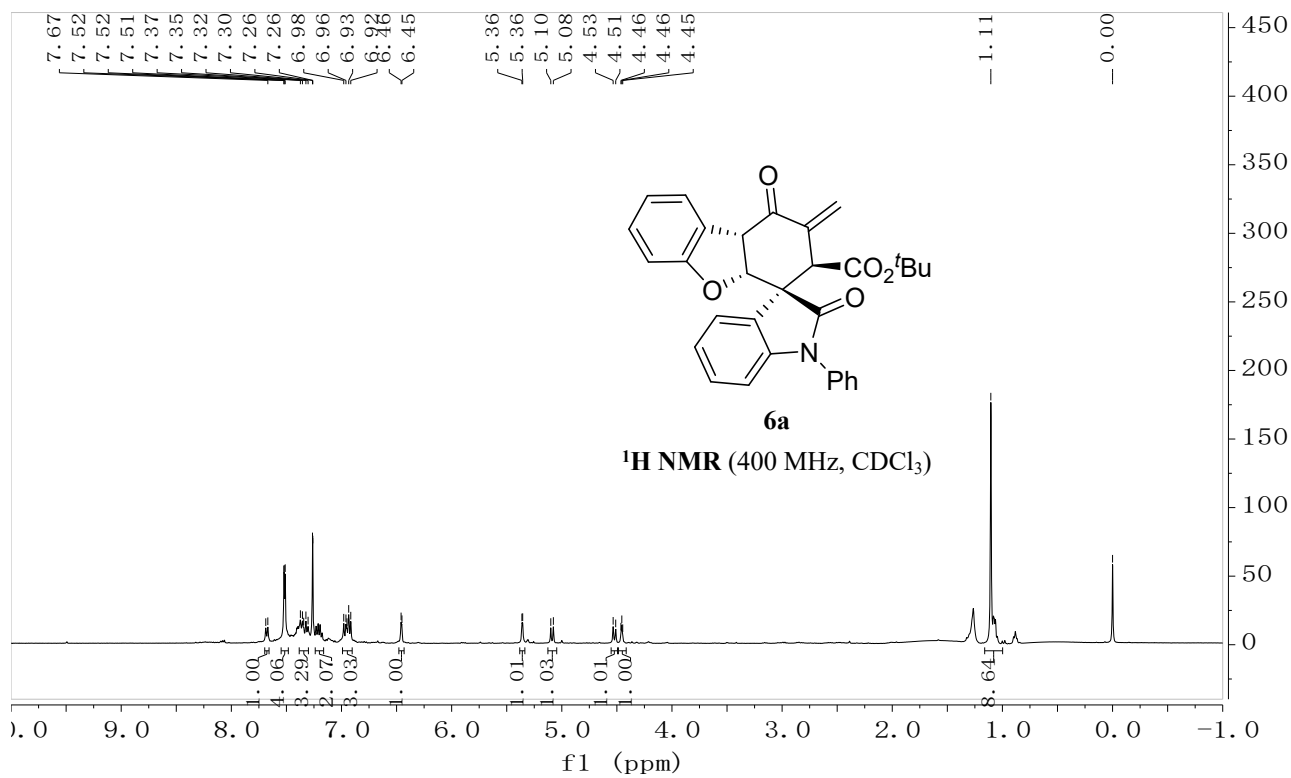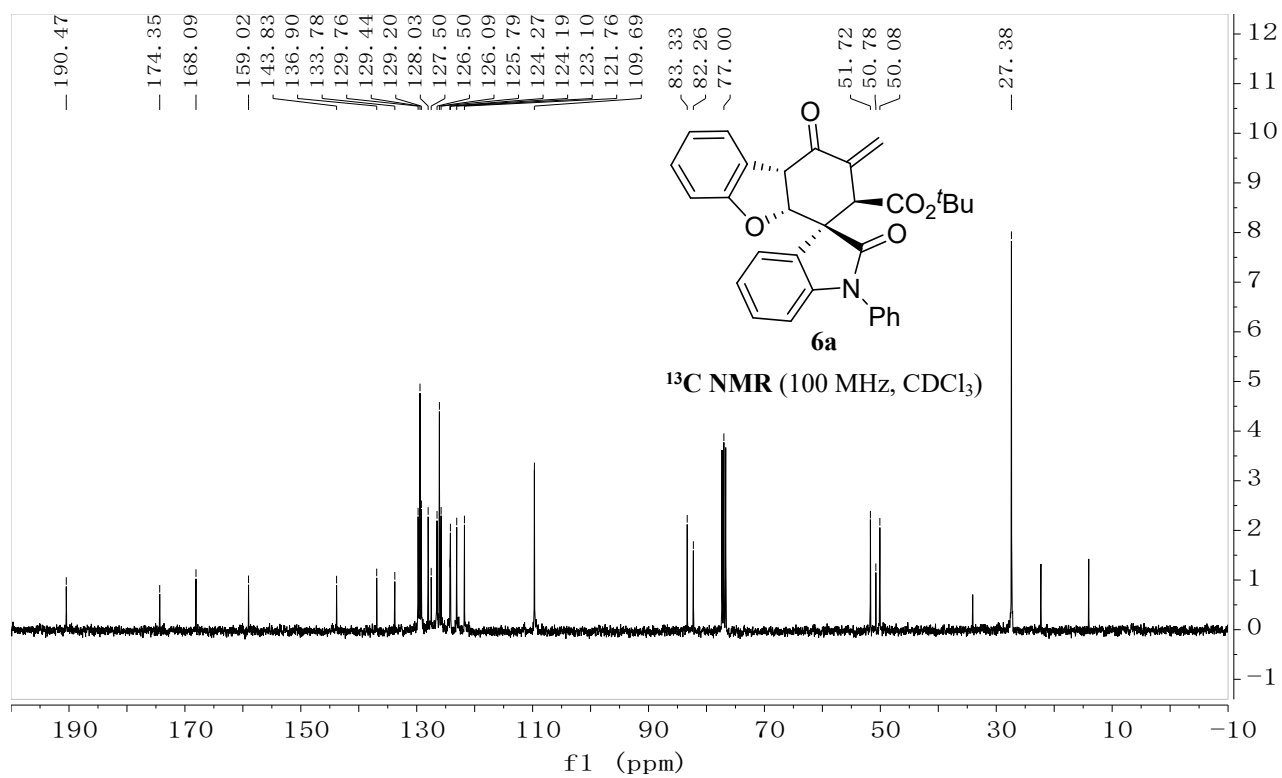



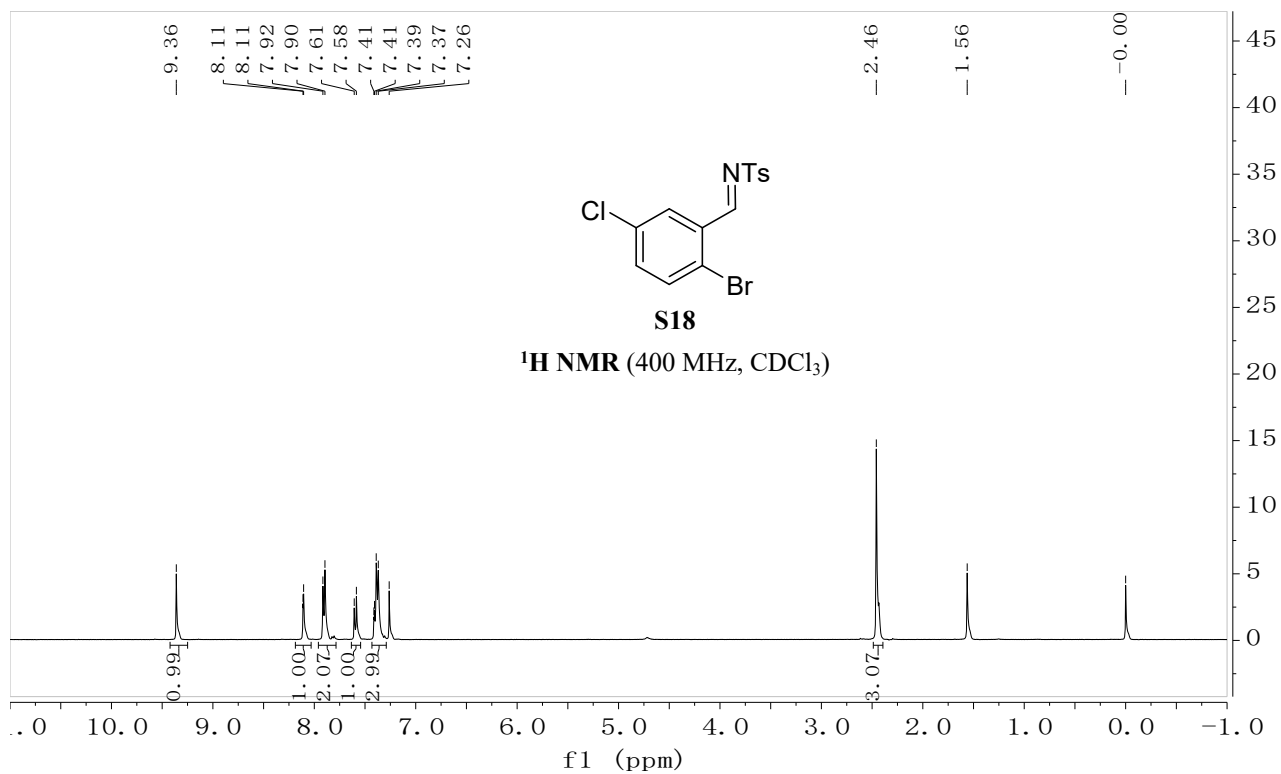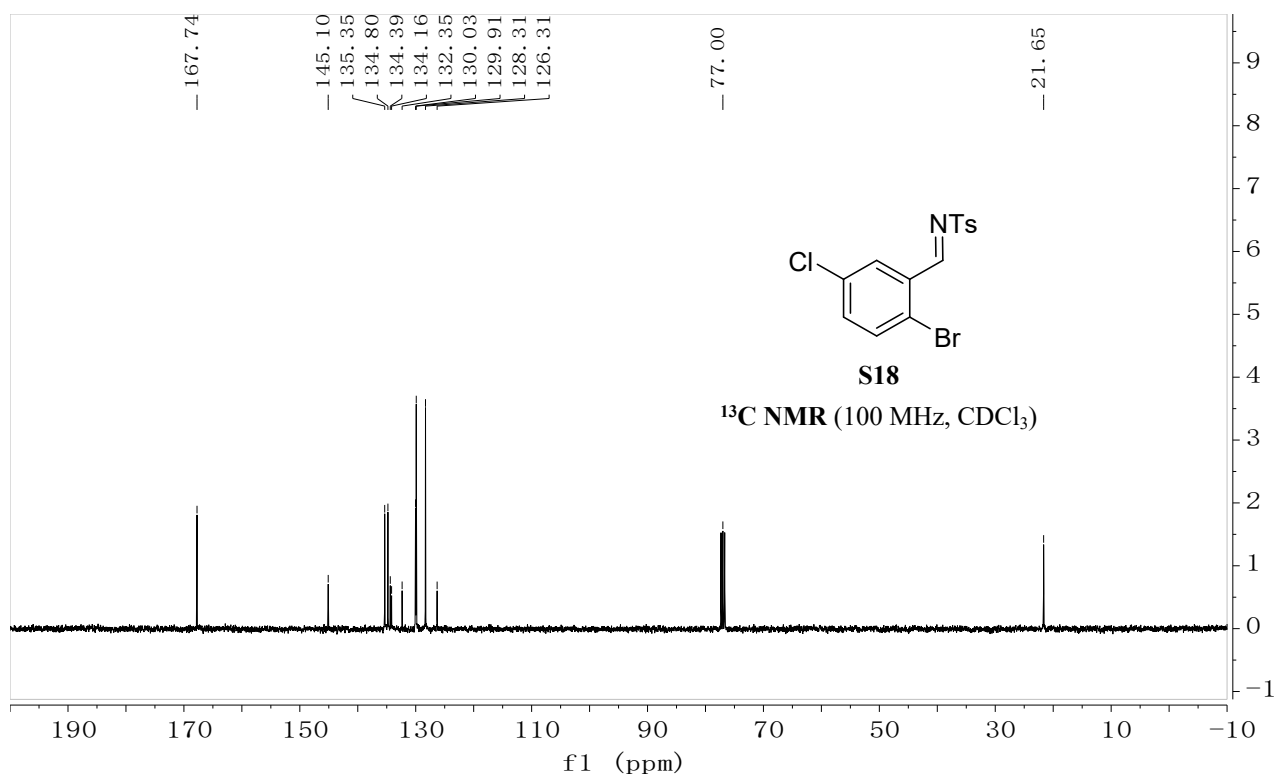

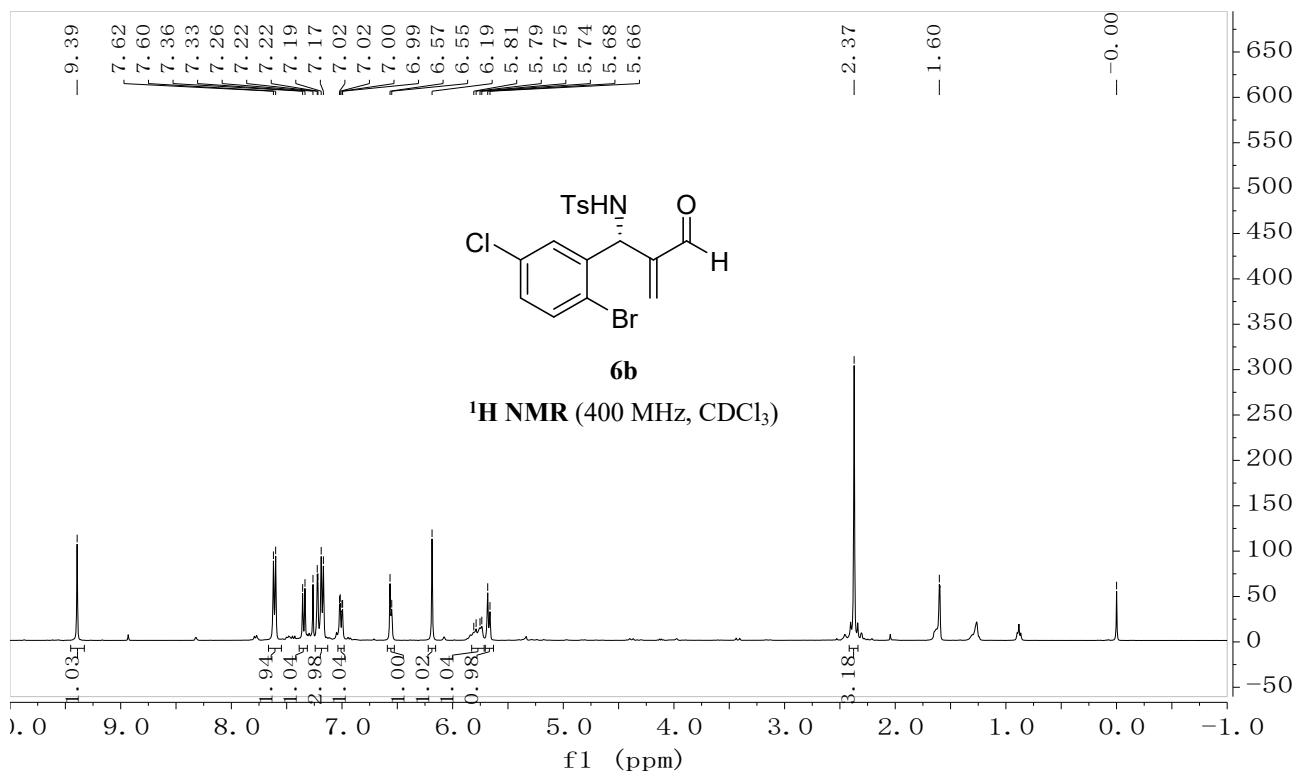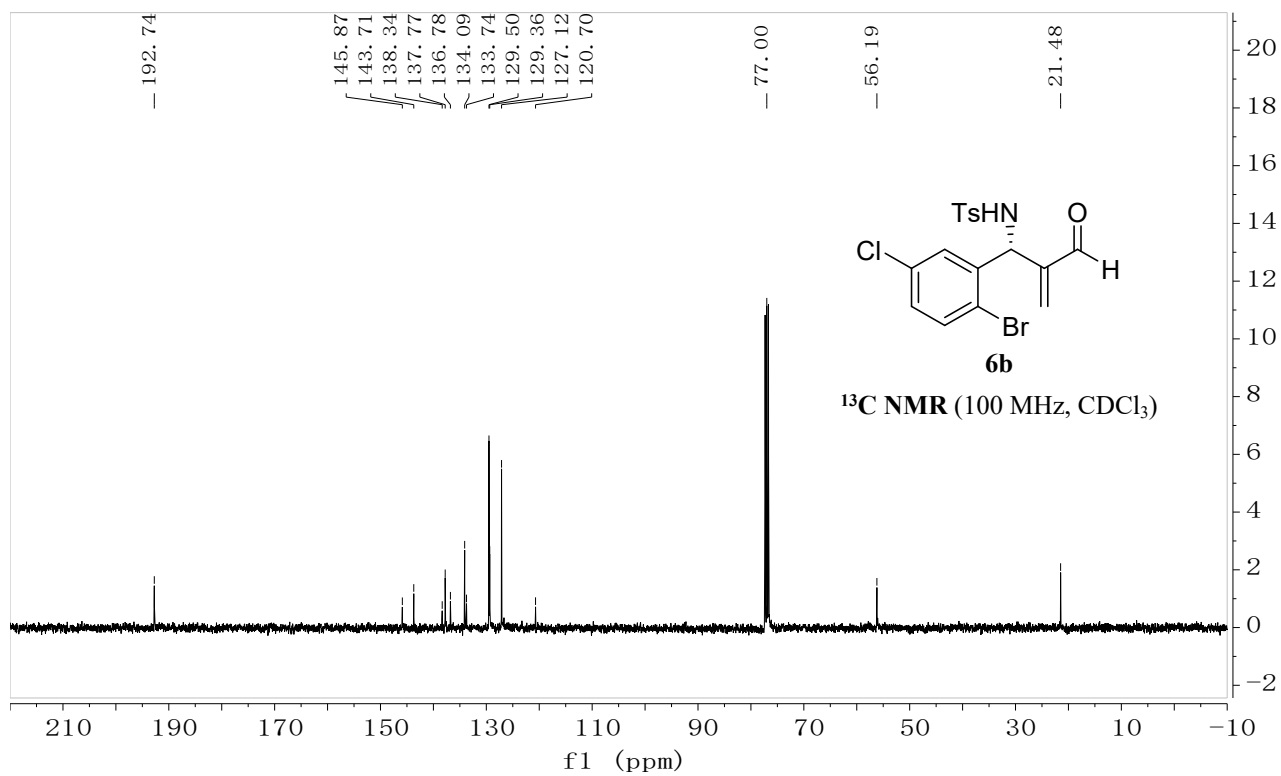

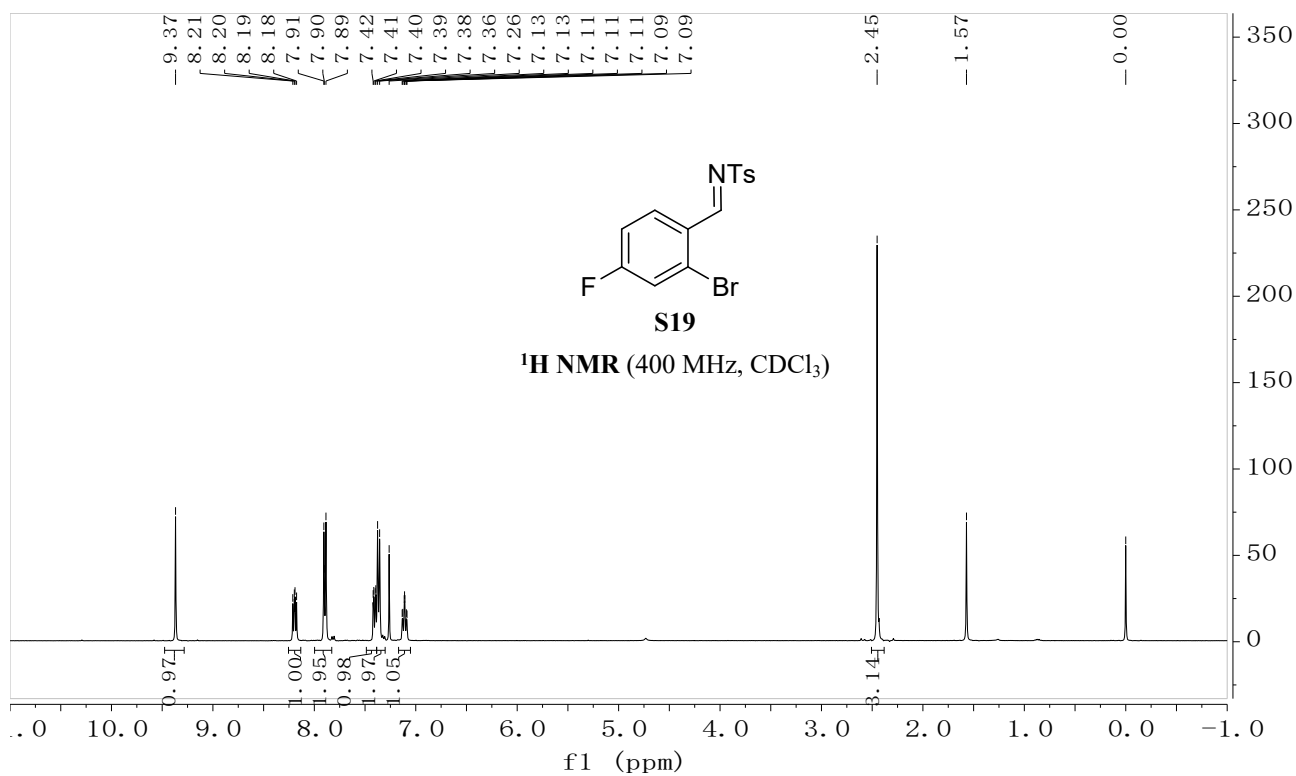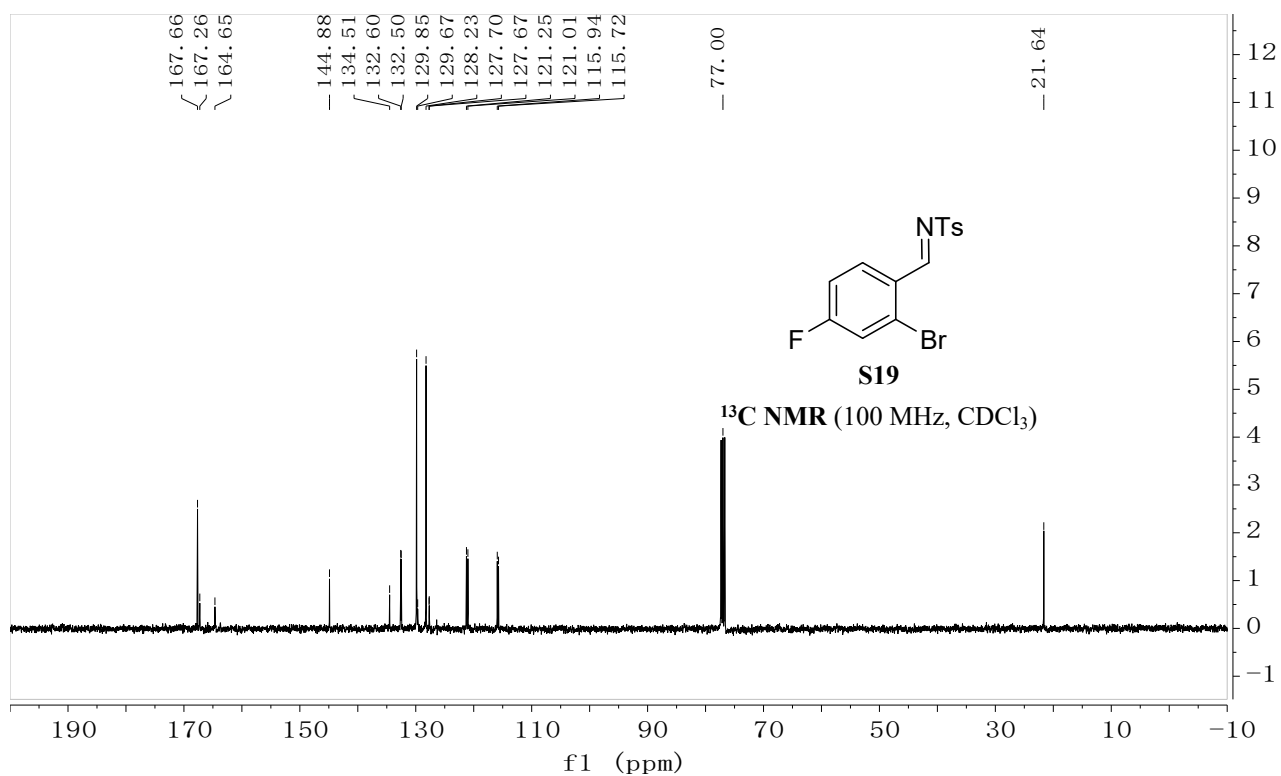

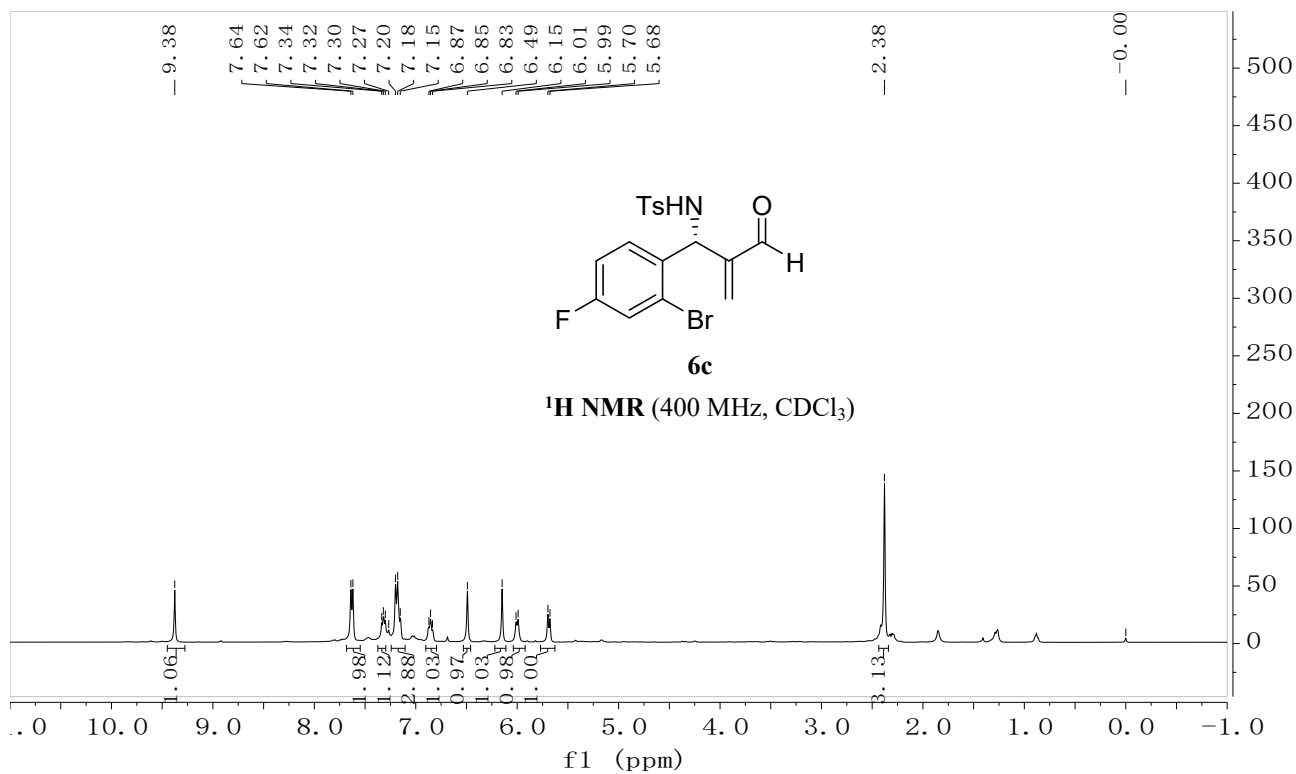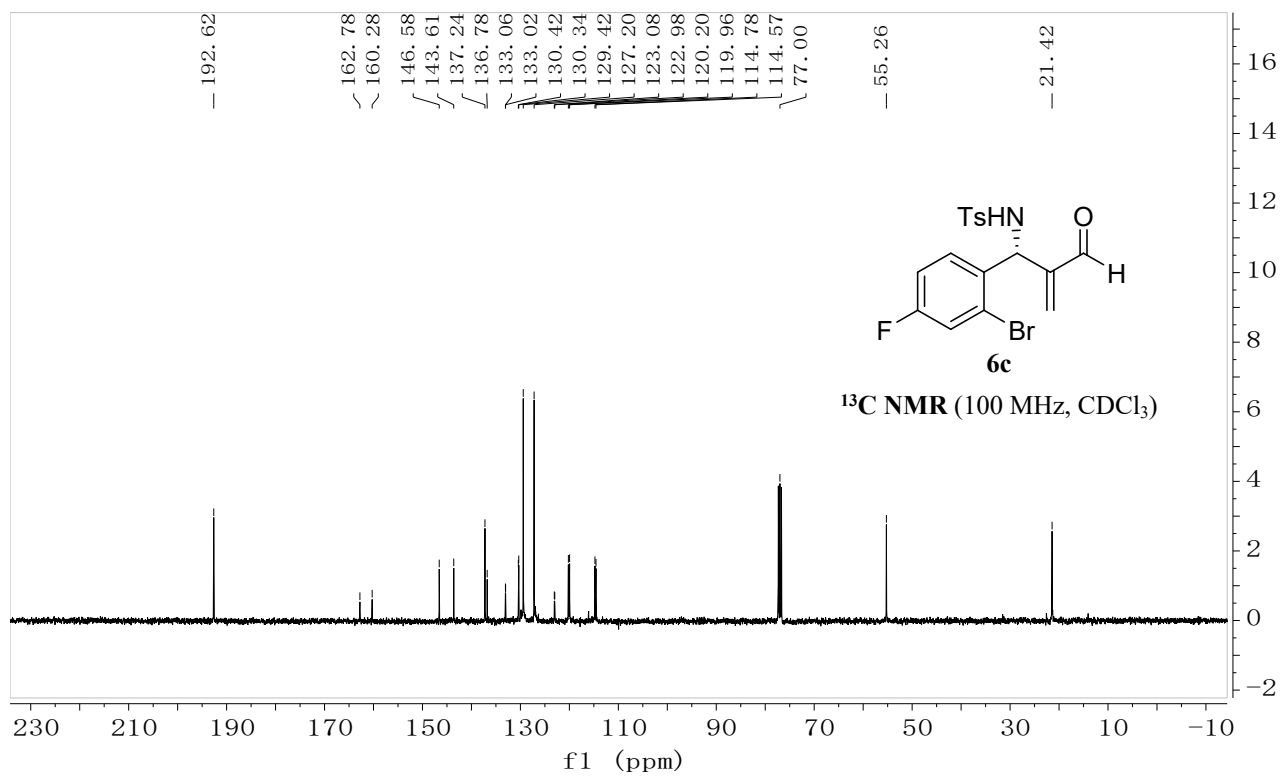

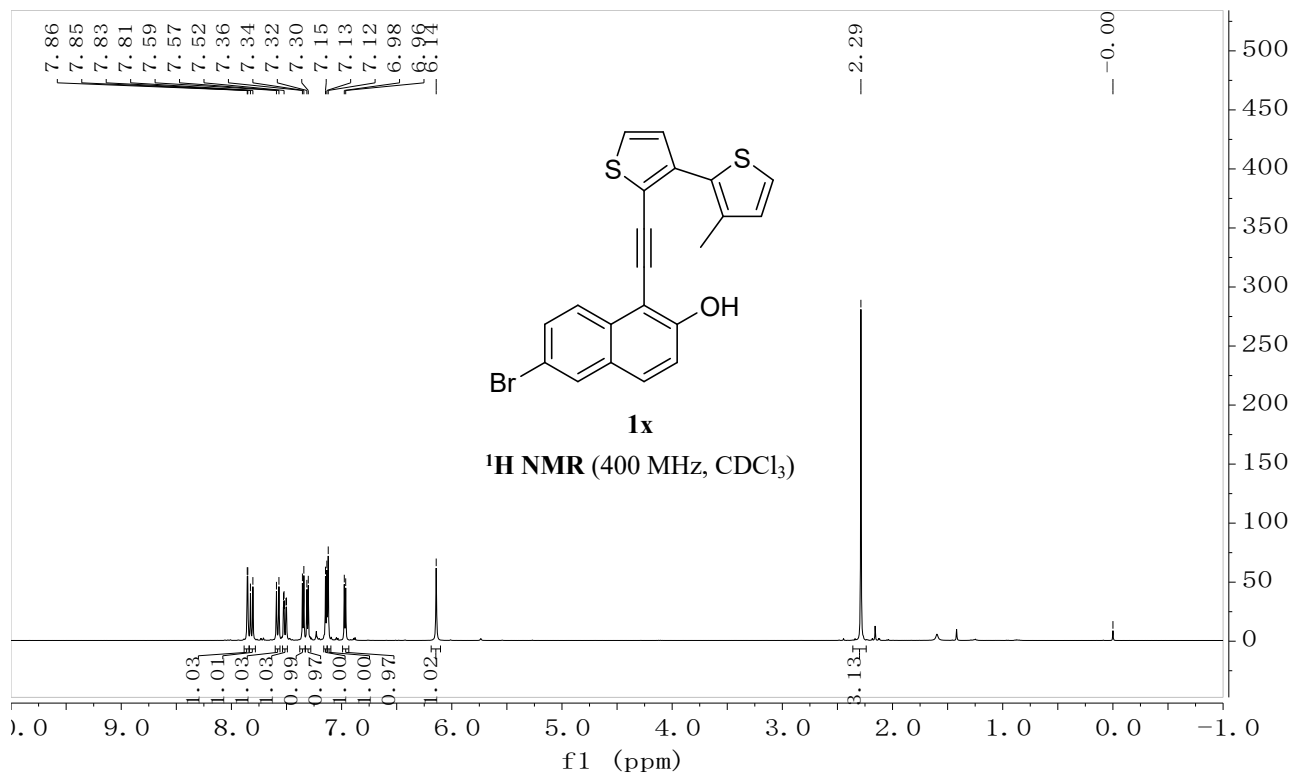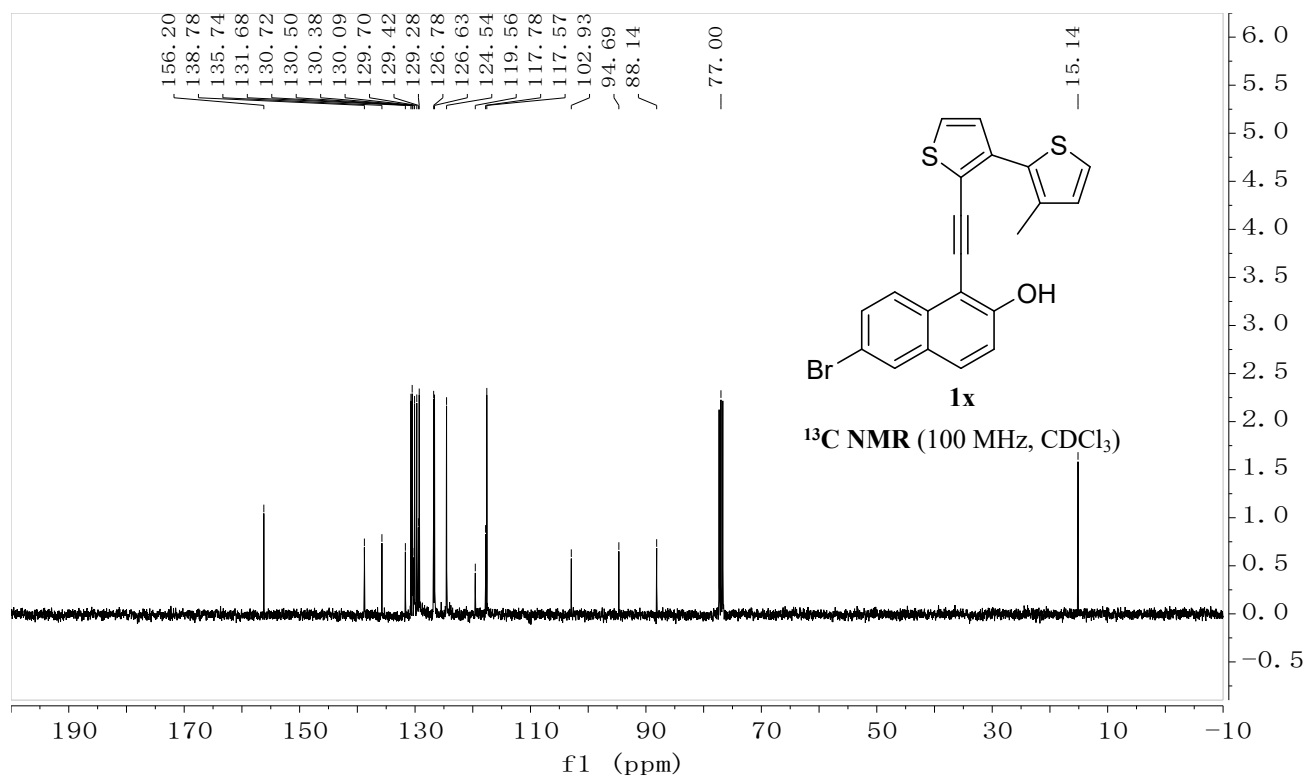

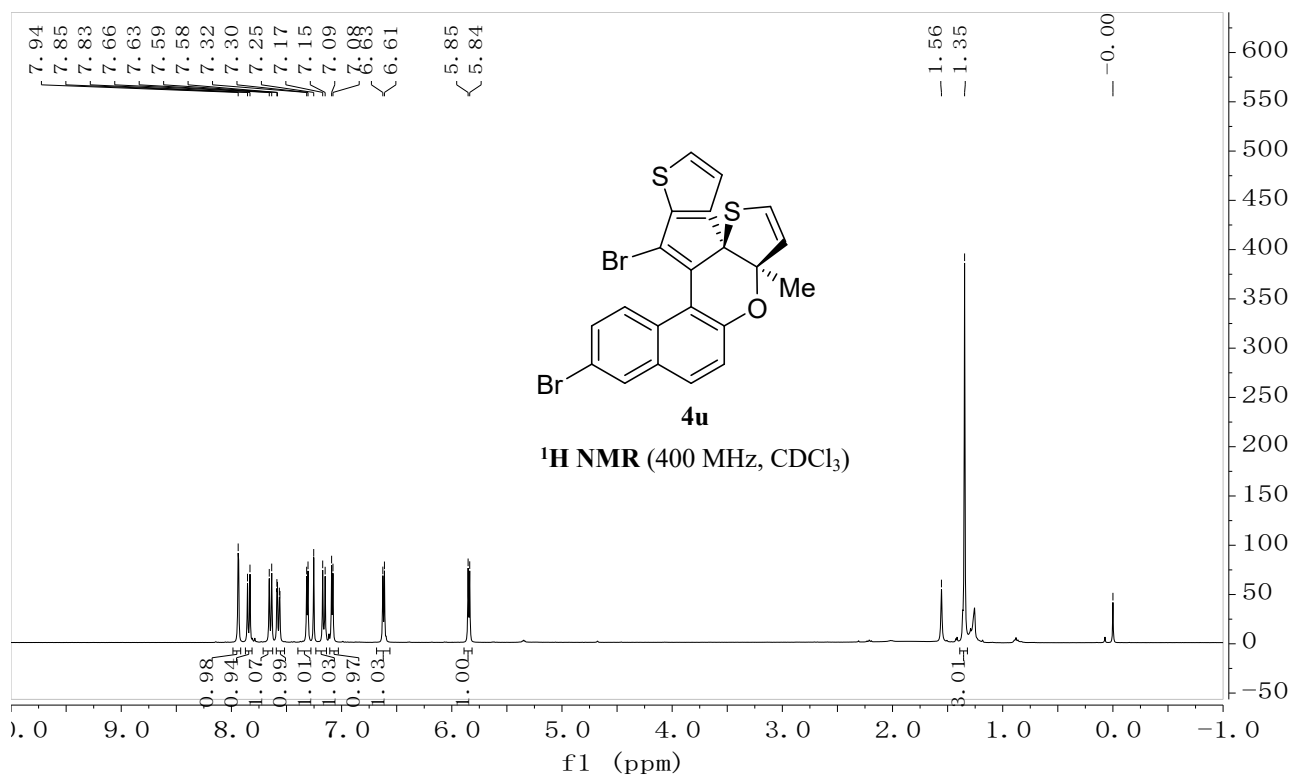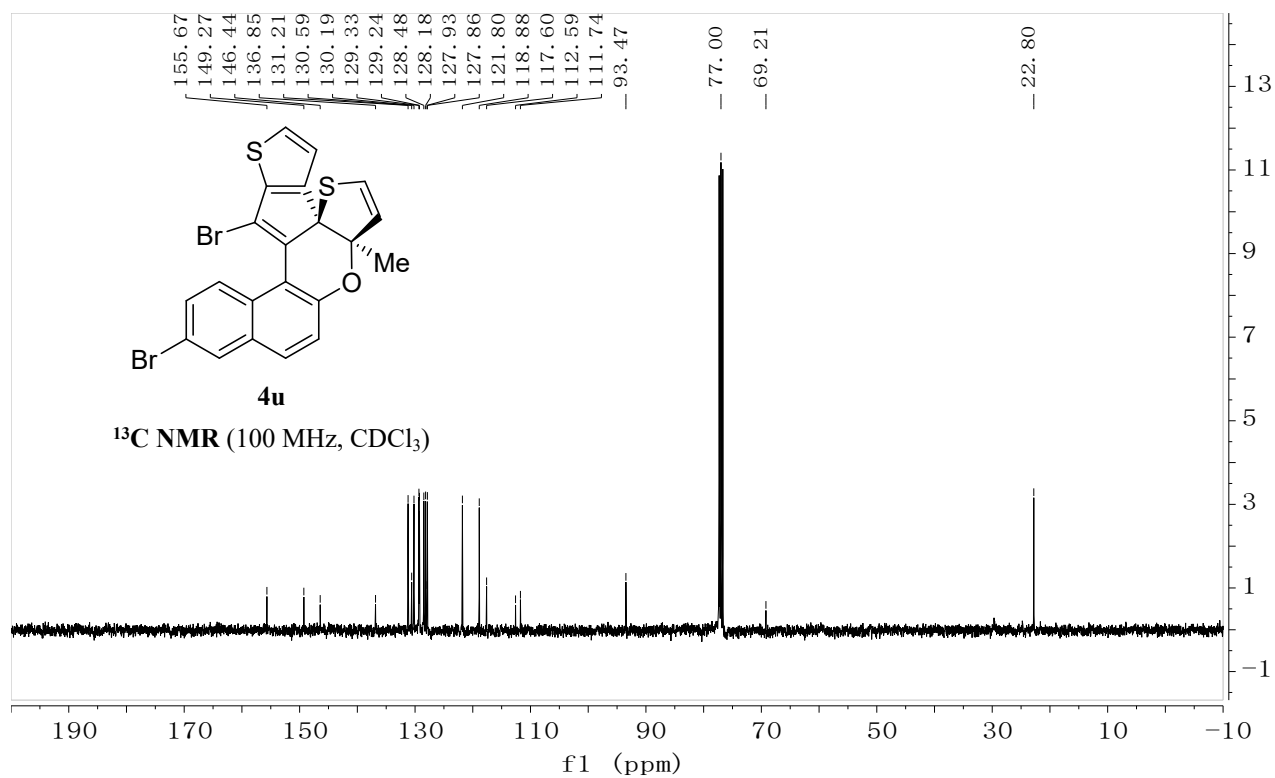

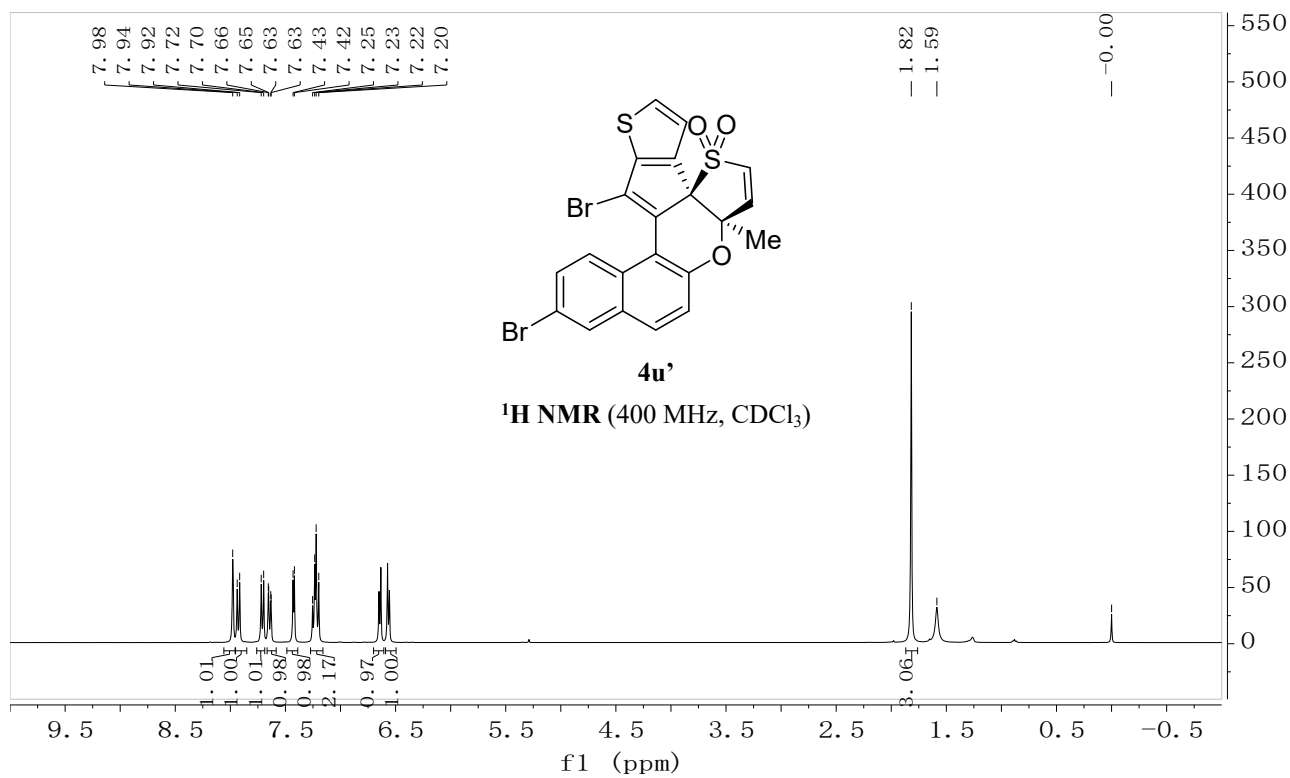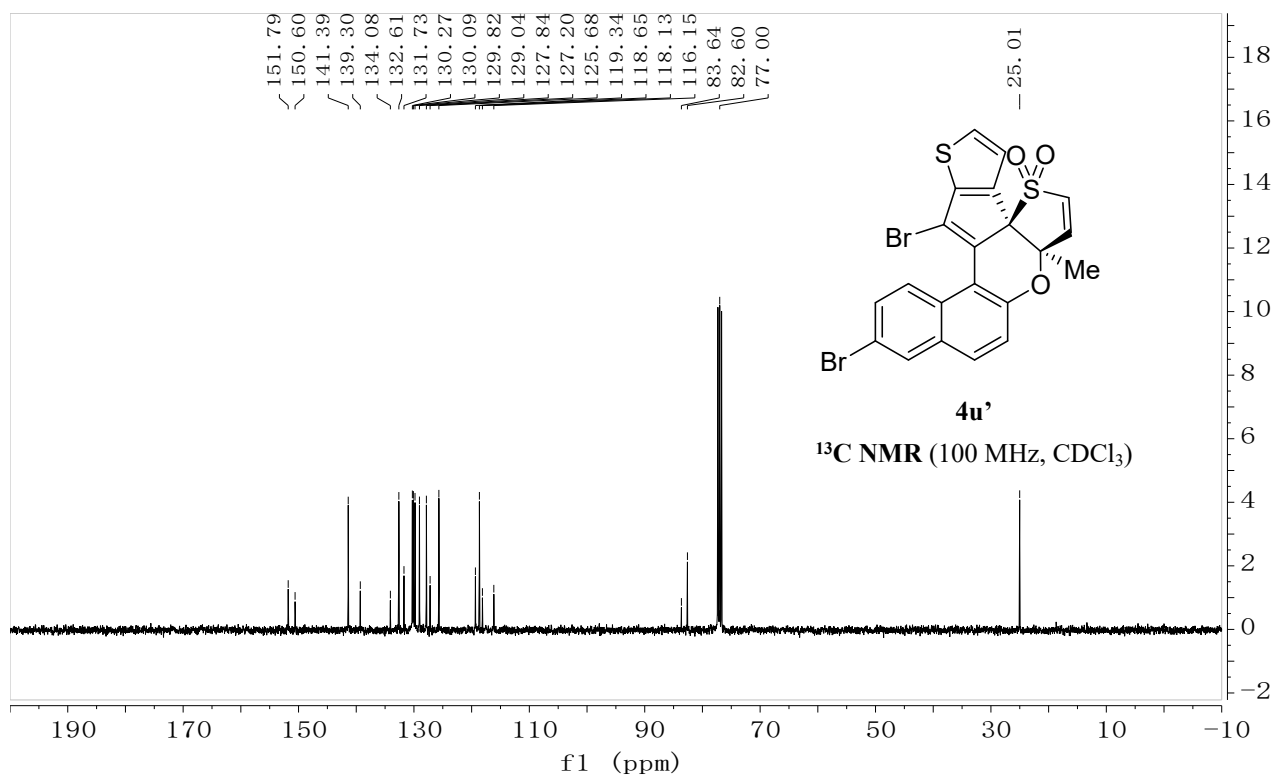

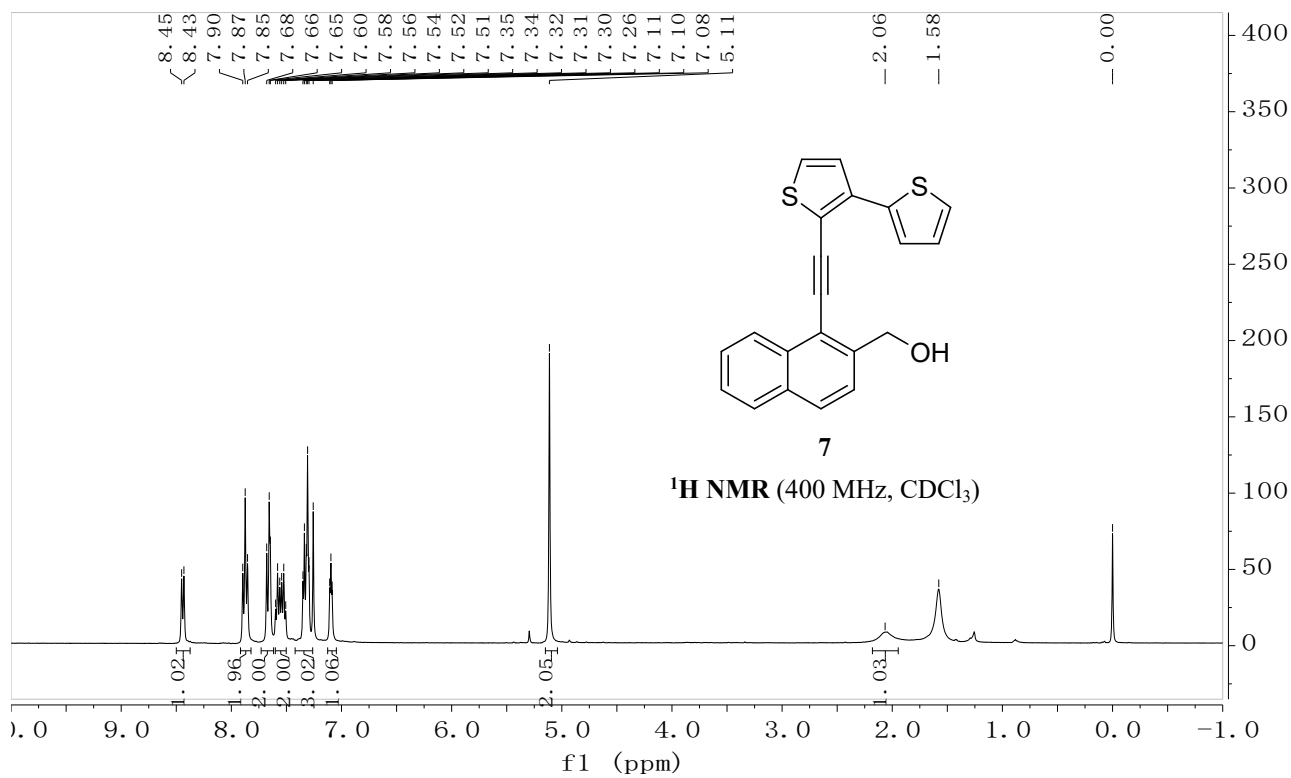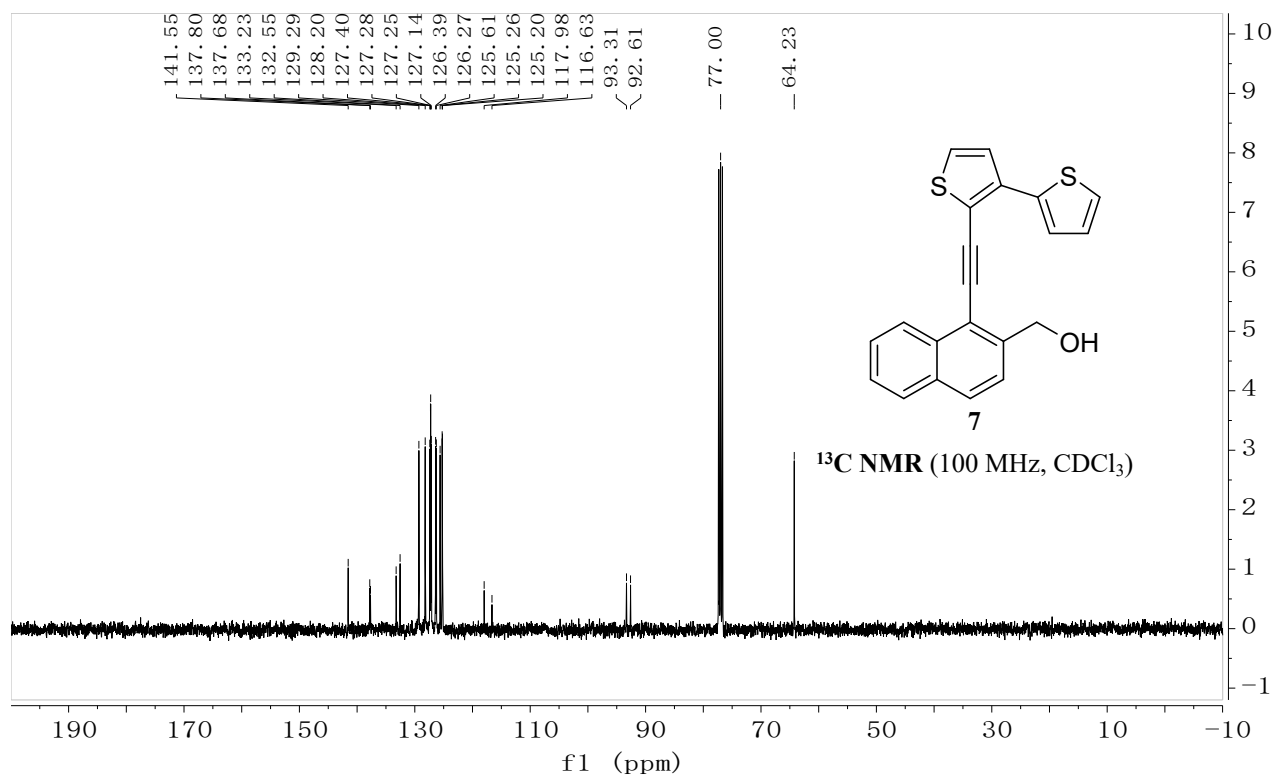



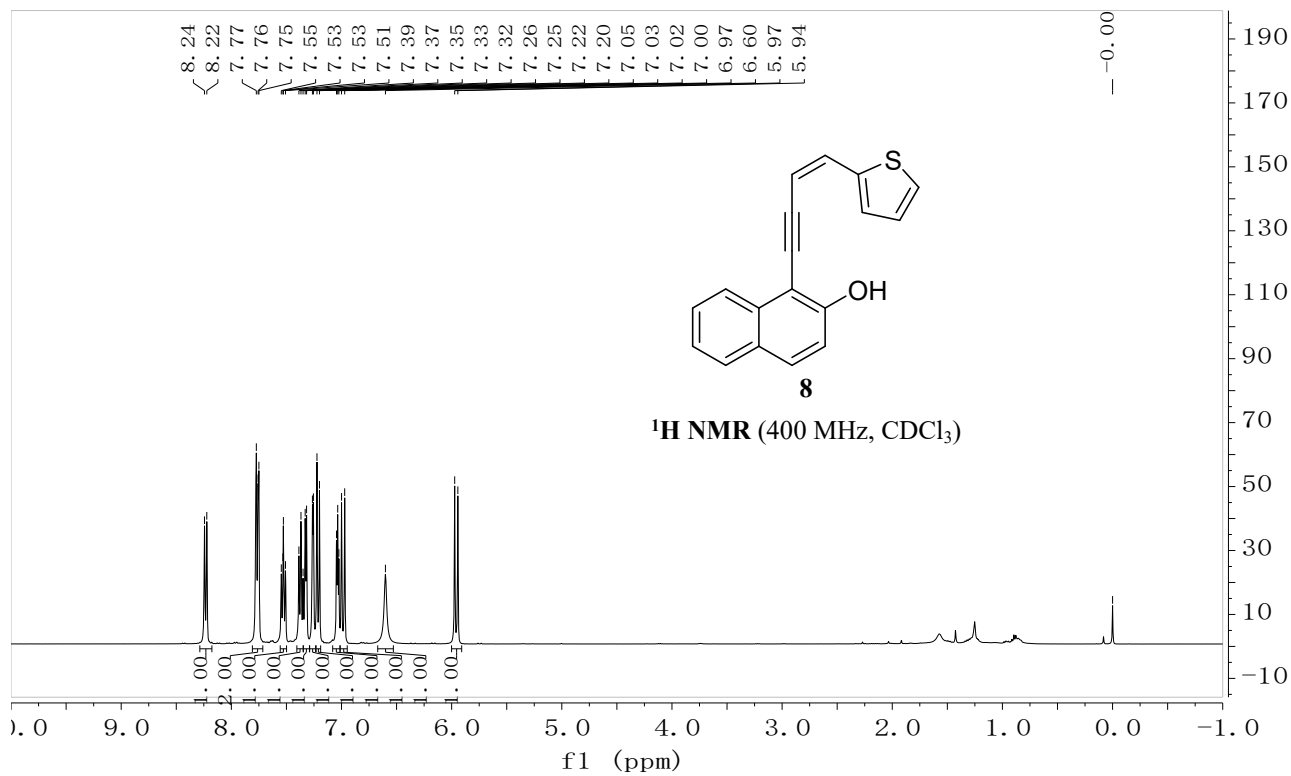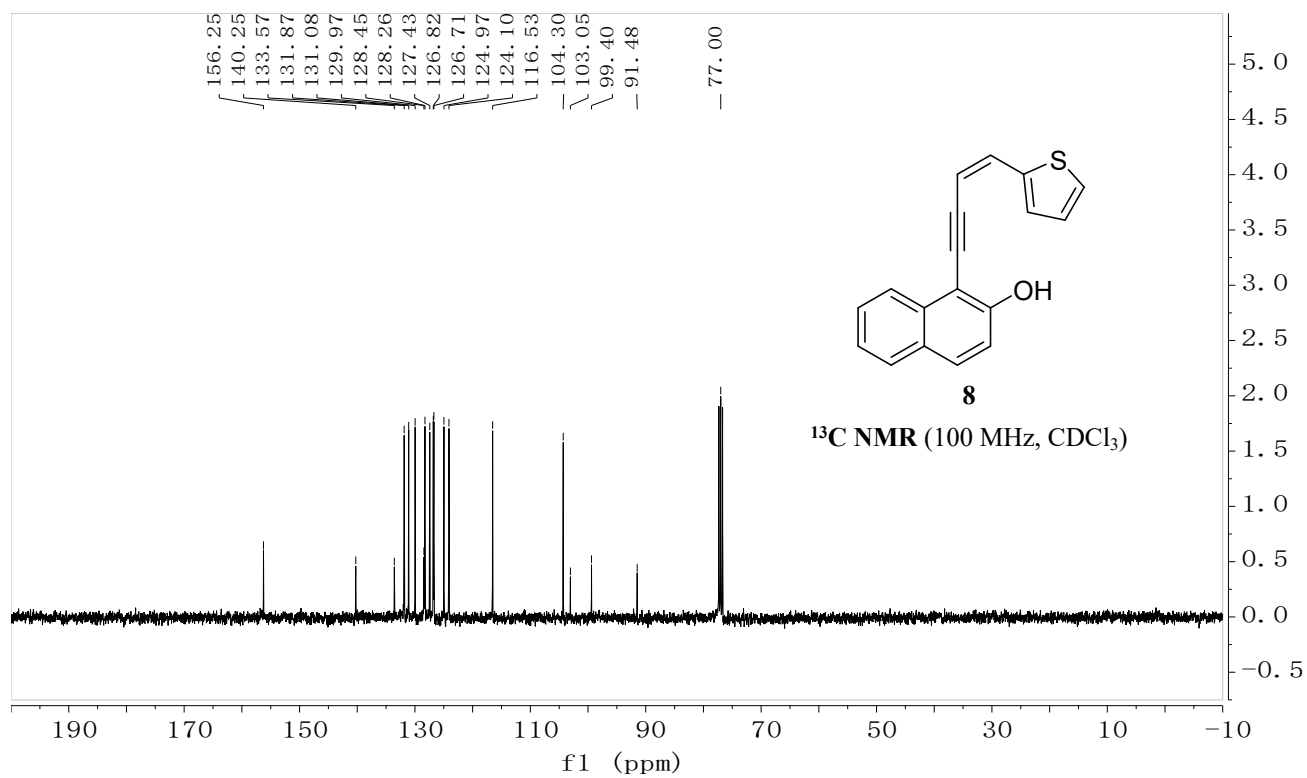

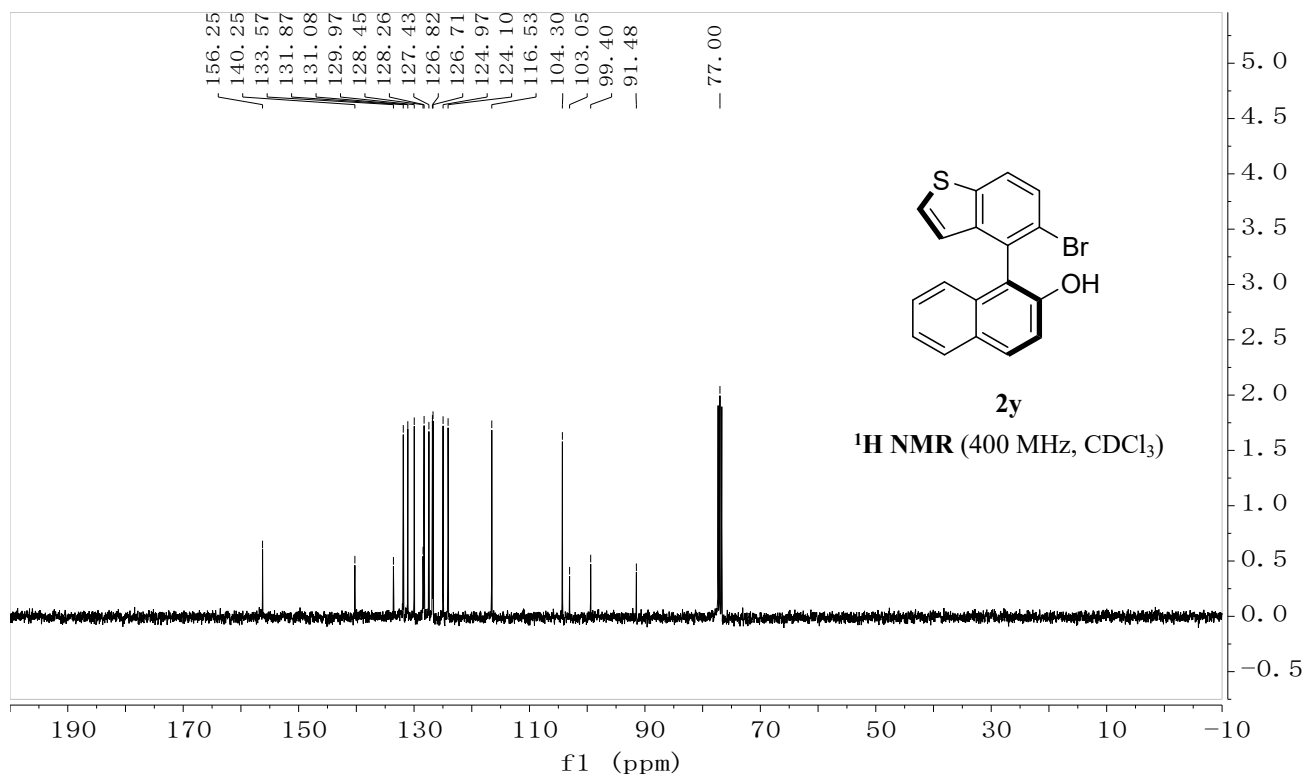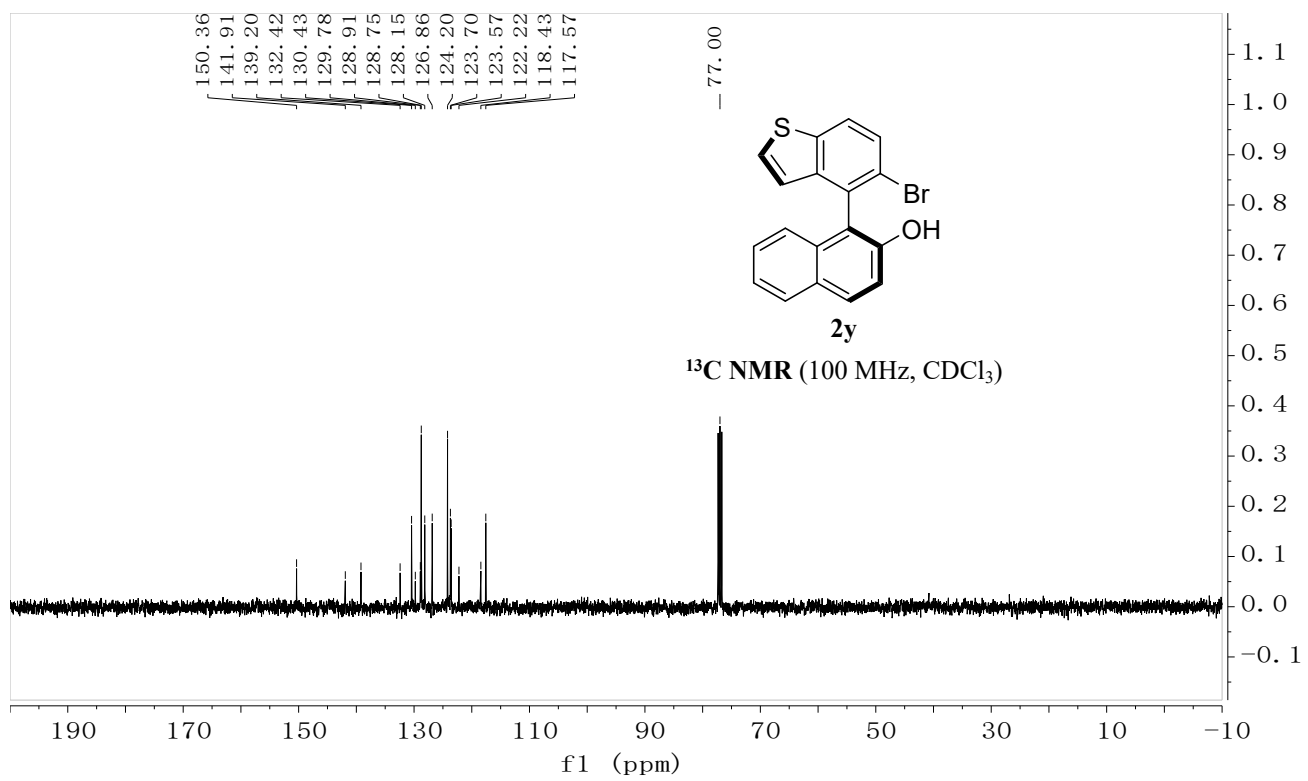

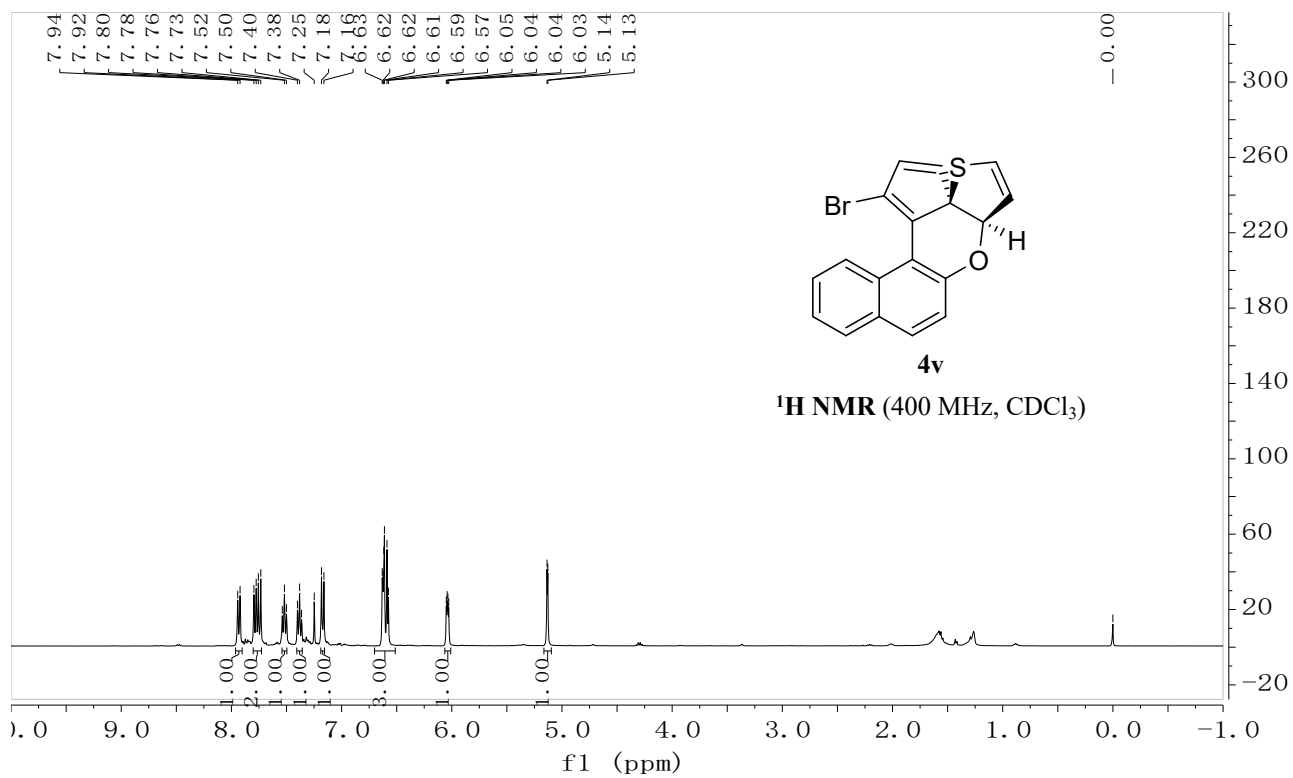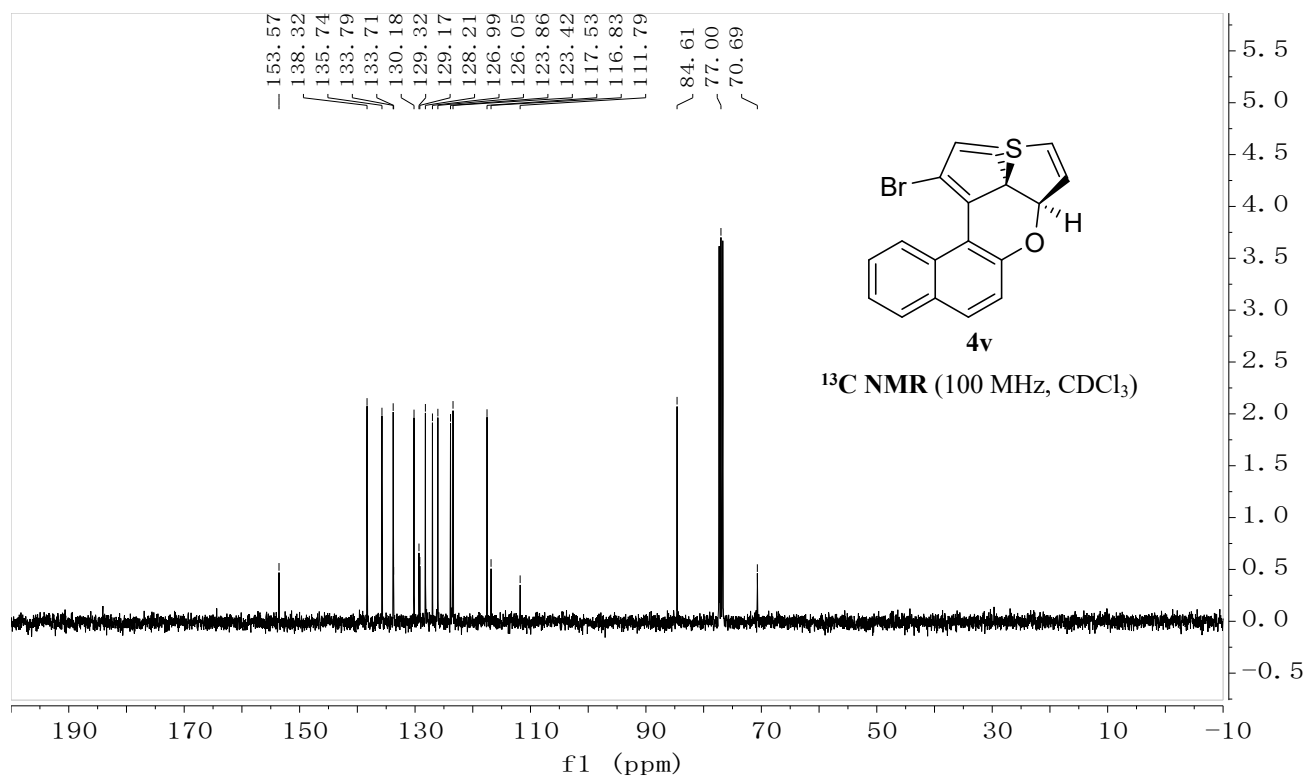

#### XIV. X-ray crystallographic information

The authors thank Mr. Xiangnan Gong (Analytical and Testing Center of Chongqing University) for spectroscopic measurements.

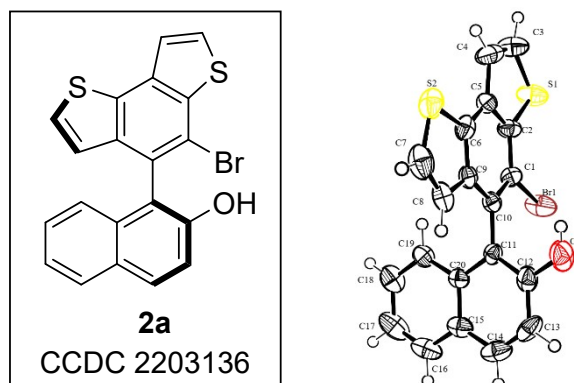

Supplementary Figure 2. ORTEP-style illustration of 2a with ellipsoids at 50% probability

|                                             |                                                   |
|---------------------------------------------|---------------------------------------------------|
| Identification code                         | 20220411-ZZX-0411-200K                            |
| Empirical formula                           | C <sub>20</sub> H <sub>11</sub> BrOS <sub>2</sub> |
| Formula weight                              | 411.32                                            |
| Temperature/K                               | 200.00(10)                                        |
| Crystal system                              | trigonal                                          |
| Space group                                 | P32                                               |
| a/Å                                         | 12.4762(8)                                        |
| b/Å                                         | 12.4762(8)                                        |
| c/Å                                         | 9.5066(6)                                         |
| $\alpha$ /°                                 | 90                                                |
| $\beta$ /°                                  | 90                                                |
| $\gamma$ /°                                 | 120                                               |
| Volume/Å <sup>3</sup>                       | 1281.50(18)                                       |
| Z                                           | 3                                                 |
| $\rho$ calc/cm <sup>3</sup>                 | 1.599                                             |
| $\mu$ /mm <sup>-1</sup>                     | 2.653                                             |
| F(000)                                      | 618.0                                             |
| Crystal size/mm <sup>3</sup>                | 0.36 × 0.35 × 0.32                                |
| Radiation                                   | Mo K $\alpha$ ( $\lambda$ = 0.71073)              |
| 2 $\theta$ range for data collection/°      | 3.77 to 58.032                                    |
| Index ranges                                | -15 ≤ h ≤ 15, -15 ≤ k ≤ 15, -12 ≤ l ≤ 12          |
| Reflections collected                       | 6071                                              |
| Independent reflections                     | 3885 [Rint = 0.0325, Rsigma = 0.0753]             |
| Data/restraints/parameters                  | 3885/1/218                                        |
| Goodness-of-fit on F <sup>2</sup>           | 0.997                                             |
| Final R indexes [I ≥ 2 $\sigma$ (I)]        | R1 = 0.0458, wR2 = 0.0653                         |
| Final R indexes [all data]                  | R1 = 0.0704, wR2 = 0.0771                         |
| Largest diff. peak/hole / e Å <sup>-3</sup> | 0.40/-0.62                                        |
| Flack parameter                             | -0.007(5)                                         |

The CIF file is available on CCDC (2203136). The author response to the check CIF alert is shown below:

Alert level B: PLAT420\_ALERT\_2\_B D-H Without Acceptor O1---H1. Please Check

RESPONSE: This alert is from the existence of naphthol bearing an O-H bond forming no hydrogen bonds. The probable hydrogen bond is the O1—H1---S2. But in the molecular structure, the distance between S005 and H007 is far greater than the critical value of hydrogen bond formation. The angle and distance between O1—H1---S2 are inappropriate. In this case, there is no potential hydrogen bond acceptor near the naphthol molecule.

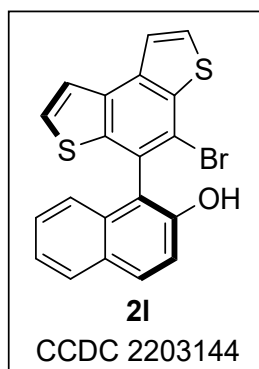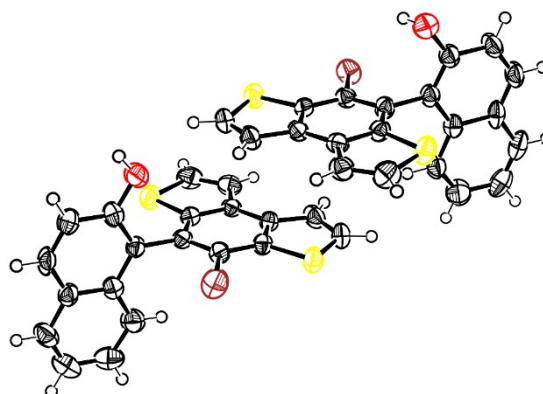

**Supplementary Figure 3. ORTEP-style illustration  
50% probability**

**of 21 with ellipsoids at**

|                                             |                                                               |
|---------------------------------------------|---------------------------------------------------------------|
| Identification code                         | 20220613-ZZX-1291                                             |
| Empirical formula                           | C <sub>20</sub> H <sub>11</sub> BrOS <sub>2</sub>             |
| Formula weight                              | 411.32                                                        |
| Temperature/K                               | 293(2)                                                        |
| Crystal system                              | monoclinic                                                    |
| Space group                                 | P21                                                           |
| a/Å                                         | 7.4965(3)                                                     |
| b/Å                                         | 19.1120(7)                                                    |
| c/Å                                         | 11.7078(4)                                                    |
| $\alpha$ /°                                 | 90                                                            |
| $\beta$ /°                                  | 96.131(4)                                                     |
| $\gamma$ /°                                 | 90                                                            |
| Volume/Å <sup>3</sup>                       | 1667.82(11)                                                   |
| Z                                           | 4                                                             |
| $\rho$ <sub>calc</sub> /cm <sup>3</sup>     | 1.638                                                         |
| $\mu$ /mm <sup>-1</sup>                     | 2.718                                                         |
| F(000)                                      | 824.0                                                         |
| Crystal size/mm <sup>3</sup>                | 0.38 × 0.36 × 0.31                                            |
| Radiation                                   | Mo K $\alpha$ ( $\lambda$ = 0.71073)                          |
| 2 $\theta$ range for data collection/°      | 3.498 to 58.136                                               |
| Index ranges                                | -9 ≤ h ≤ 10, -24 ≤ k ≤ 24, -15 ≤ l ≤ 15                       |
| Reflections collected                       | 24487                                                         |
| Independent reflections                     | 7929 [R <sub>int</sub> = 0.0384, R <sub>sigma</sub> = 0.0493] |
| Data/restraints/parameters                  | 7929/1/435                                                    |
| Goodness-of-fit on F <sup>2</sup>           | 1.030                                                         |
| Final R indexes [ $I \geq 2\sigma(I)$ ]     | R <sub>1</sub> = 0.0440, wR <sub>2</sub> = 0.0946             |
| Final R indexes [all data]                  | R <sub>1</sub> = 0.0708, wR <sub>2</sub> = 0.1082             |
| Largest diff. peak/hole / e Å <sup>-3</sup> | 1.31/-0.40                                                    |

Flack parameter

0.001(5)

The CIF file is available on CCDC (2203144). The author response to the check CIF alert is shown below:

PLAT420\_ALERT\_2\_B D-H Bond Without Acceptor O007---H007 Please Check

RESPONSE: This alert is from the existence of naphthol bearing an O-H bond forming no hydrogen bonds. The probable hydrogen bond is the O007—H007---S005. But in the molecular structure, the distance between S005 and H007 is far greater than the critical value of hydrogen bond formation. The angle and distance between O007—H007---S005 are inappropriate. In this case, there is no potential hydrogen bond acceptor near the naphthol molecule.

PLAT919\_ALERT\_3\_B Reflection # Likely Affected by the Beamstop 1 Check

RESPONSE: This alert reports the number of reflections with intensities is affected by the beamstop. The beamstop is a electronic component used to protect the detector from the strong X-Ray, it may may affect the signal at certain angles.

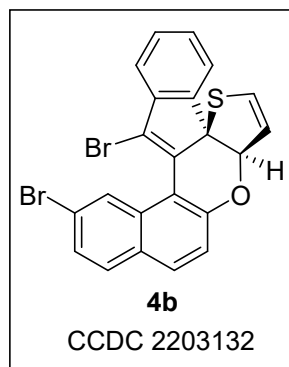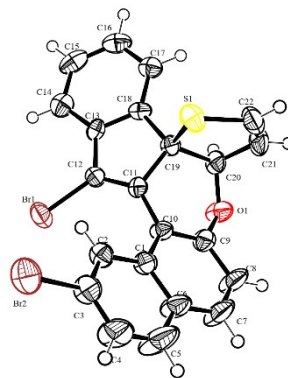

**Supplementary Figure 4. ORTEP-style illustration of 4b with ellipsoids at 50% probability**

|                                             |                                                                  |
|---------------------------------------------|------------------------------------------------------------------|
| Identification code                         | 20201230-Yan HL-PL-ZZA-53                                        |
| Empirical formula                           | C <sub>22</sub> H <sub>12</sub> Br <sub>2</sub> O <sub>2</sub> S |
| Formula weight                              | 484.20                                                           |
| Temperature/K                               | 295                                                              |
| Crystal system                              | orthorhombic                                                     |
| Space group                                 | P2 <sub>1</sub> 2 <sub>1</sub> 2 <sub>1</sub>                    |
| a/Å                                         | 8.0277(5)                                                        |
| b/Å                                         | 10.4982(4)                                                       |
| c/Å                                         | 22.0586(11)                                                      |
| $\alpha$ /°                                 | 90                                                               |
| $\beta$ /°                                  | 90                                                               |
| $\gamma$ /°                                 | 90                                                               |
| Volume/Å <sup>3</sup>                       | 1859.02(16)                                                      |
| Z                                           | 4                                                                |
| $\rho$ calc/gcm <sup>3</sup>                | 1.730                                                            |
| $\mu$ /mm <sup>-1</sup>                     | 4.481                                                            |
| F(000)                                      | 952.0                                                            |
| Crystal size/mm <sup>3</sup>                | ? × ? × ?                                                        |
| Radiation                                   | MoK $\alpha$ ( $\lambda$ = 0.71073)                              |
| 2 $\theta$ range for data collection/°      | 6.766 to 58.222                                                  |
| Index ranges                                | -10 ≤ h ≤ 9, -13 ≤ k ≤ 14, -30 ≤ l ≤ 16                          |
| Reflections collected                       | 7547                                                             |
| Independent reflections                     | 4232 [Rint = 0.0374, Rsigma = 0.0728]                            |
| Data/restraints/parameters                  | 4232/0/235                                                       |
| Goodness-of-fit on F <sup>2</sup>           | 1.071                                                            |
| Final R indexes [I ≥ 2 $\sigma$ (I)]        | R1 = 0.0529, wR2 = 0.1060                                        |
| Final R indexes [all data]                  | R1 = 0.0856, wR2 = 0.1236                                        |
| Largest diff. peak/hole / e Å <sup>-3</sup> | 0.59/-0.71                                                       |
| Flack parameter                             | 0.000(11)                                                        |



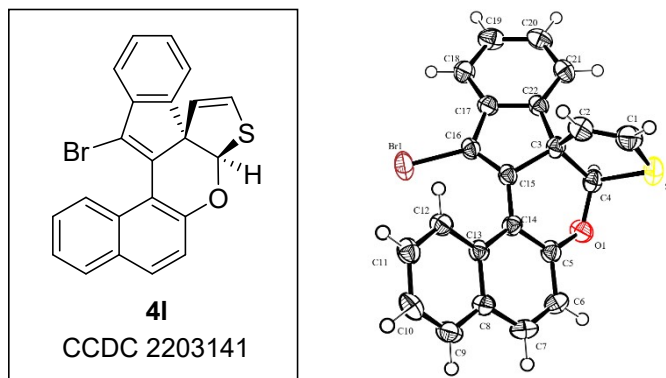

Figure 5. ORTEP-style illustration of 41 with ellipsoids at 50% probability

|                                             |                                                               |
|---------------------------------------------|---------------------------------------------------------------|
| Identification code                         | 20220613-ZZX-1290                                             |
| Empirical formula                           | C <sub>22</sub> H <sub>13</sub> BrOS                          |
| Formula weight                              | 405.29                                                        |
| Temperature/K                               | 293(2)                                                        |
| Crystal system                              | monoclinic                                                    |
| Space group                                 | P2 <sub>1</sub>                                               |
| a/Å                                         | 9.0211(4)                                                     |
| b/Å                                         | 8.9321(3)                                                     |
| c/Å                                         | 11.4528(6)                                                    |
| $\alpha$ /°                                 | 90                                                            |
| $\beta$ /°                                  | 113.132(6)                                                    |
| $\gamma$ /°                                 | 90                                                            |
| Volume/Å <sup>3</sup>                       | 848.64(7)                                                     |
| Z                                           | 2                                                             |
| $\rho_{\text{calc}}$ /cm <sup>3</sup>       | 1.586                                                         |
| $\mu$ /mm <sup>-1</sup>                     | 2.551                                                         |
| F(000)                                      | 408.0                                                         |
| Crystal size/mm <sup>3</sup>                | 0.43 × 0.39 × 0.35                                            |
| Radiation                                   | Mo K $\alpha$ ( $\lambda$ = 0.71073)                          |
| 2 $\theta$ range for data collection/°      | 3.868 to 58.68                                                |
| Index ranges                                | -11 ≤ h ≤ 12, -11 ≤ k ≤ 12, -14 ≤ l ≤ 14                      |
| Reflections collected                       | 13415                                                         |
| Independent reflections                     | 4043 [R <sub>int</sub> = 0.0359, R <sub>sigma</sub> = 0.0356] |
| Data/restraints/parameters                  | 4043/1/226                                                    |
| Goodness-of-fit on F <sup>2</sup>           | 1.077                                                         |
| Final R indexes [I ≥ 2 $\sigma$ (I)]        | R <sub>1</sub> = 0.0347, wR <sub>2</sub> = 0.0781             |
| Final R indexes [all data]                  | R <sub>1</sub> = 0.0431, wR <sub>2</sub> = 0.0834             |
| Largest diff. peak/hole / e Å <sup>-3</sup> | 0.30/-0.82                                                    |
| Flack parameter                             | -0.006(4)                                                     |

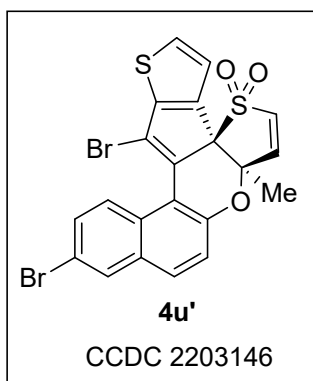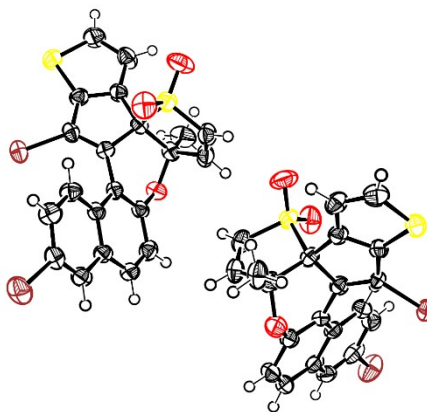

**Supplementary Figure 6. ORTEP-style illustration of 4u' with ellipsoids at 50% probability**

|                                             |                                                                               |
|---------------------------------------------|-------------------------------------------------------------------------------|
| Identification code                         | 20220708-ZZX-1312                                                             |
| Empirical formula                           | C <sub>42</sub> H <sub>24</sub> Br <sub>4</sub> O <sub>6</sub> S <sub>4</sub> |
| Formula weight                              | 1072.49                                                                       |
| Temperature/K                               | 293(2)                                                                        |
| Crystal system                              | monoclinic                                                                    |
| Space group                                 | P2 <sub>1</sub>                                                               |
| a/Å                                         | 13.1561(6)                                                                    |
| b/Å                                         | 10.0689(3)                                                                    |
| c/Å                                         | 15.4836(7)                                                                    |
| α/°                                         | 90                                                                            |
| β/°                                         | 109.024(5)                                                                    |
| γ/°                                         | 90                                                                            |
| Volume/Å <sup>3</sup>                       | 1939.05(15)                                                                   |
| Z                                           | 2                                                                             |
| ρ <sub>calc</sub> /cm <sup>3</sup>          | 1.837                                                                         |
| μ/mm <sup>-1</sup>                          | 4.417                                                                         |
| F(000)                                      | 1056.0                                                                        |
| Crystal size/mm <sup>3</sup>                | 0.35 × 0.34 × 0.25                                                            |
| Radiation                                   | Mo Kα (λ = 0.71073)                                                           |
| 2θ range for data collection/°              | 3.274 to 58.174                                                               |
| Index ranges                                | -17 ≤ h ≤ 17, -13 ≤ k ≤ 13, -15 ≤ l ≤ 21                                      |
| Reflections collected                       | 15893                                                                         |
| Independent reflections                     | 8839 [R <sub>int</sub> = 0.0314, R <sub>sigma</sub> = 0.0650]                 |
| Data/restraints/parameters                  | 8839/1/507                                                                    |
| Goodness-of-fit on F <sup>2</sup>           | 1.023                                                                         |
| Final R indexes [I ≥ 2σ (I)]                | R <sub>1</sub> = 0.0405, wR <sub>2</sub> = 0.0608                             |
| Final R indexes [all data]                  | R <sub>1</sub> = 0.0687, wR <sub>2</sub> = 0.0734                             |
| Largest diff. peak/hole / e Å <sup>-3</sup> | 0.39/-0.44                                                                    |
| Flack parameter                             | -0.002(4)                                                                     |

The CIF file is available on CCDC (2203146). The author response to the check CIF alert is shown below:

PLAT919\_ALERT\_3\_B Reflection # Likely Affected by the Beamstop 1 Check

RESPONSE: This alert reports the number of reflections with intensities is affected by the beamstop. The beamstop is a electronic component used to protect the detector from the strong X-Ray, it may may affect the signal at certain angles.

## References

1. Jia, S.; Chen, Z.; Zhang, N.; Tan, Y.; Liu, Y.; Deng, J.; Yan, H. *J. Am. Chem. Soc.* **2018**, *140*, 7056-7060.
2. Gaussian 09, Revision D.01, M. J. Frisch, G. W. Trucks, H. B. Schlegel, G. E. Scuseria, M. A. Robb, J. R. Cheeseman, G. Scalmani, V. Barone, G. A. Petersson, H. Nakatsuji, X. Li, M. Caricato, A. Marenich, J. Bloino, B. G. Janesko, R. Gomperts, B. Mennucci, H. P. Hratchian, J. V. Ortiz, A. F. Izmaylov, J. L. Sonnenberg, D. Williams-Young, F. Ding, F. Lipparini, F. Egidi, J. Goings, B. Peng, A. Petrone, T. Henderson, D. Ranasinghe, V. G. Zakrzewski, J. Gao, N. Rega, G. Zheng, W. Liang, M. Hada, M. Ehara, K. Toyota, R. Fukuda, J. Hasegawa, M. Ishida, T. Nakajima, Y. Honda, O. Kitao, H. Nakai, T. Vreven, K. Throssell, J. A. Montgomery, Jr., J. E. Peralta, F. Ogliaro, M. Bearpark, J. Heyd, E. Brothers, K. N. Kudin, V. N. Staroverov, T. Keith, R. Kobayashi, J. Normand, K. Raghavachari, A. Rendell, J. C. Burant, S. S. Iyengar, J. Tomasi, M. Cossi, J. M. Millam, M. Klene, C. Adamo, R. Cammi, J. W. Ochterski, R. L. Martin, K. Morokuma, O. Farkas, J. B. Foresman, D. J. Fox, Gaussian, Inc., Wallingford CT, **2016**.
3. A. V. Marenich, C. J. Cramer, D. G. Truhlar, *J. Phys. Chem. B.* **2009**, *113*, 6378–6396.
4. (a) A. D. Becke, *J. Chem. Phys.* **1993**, *98*, 5648 – 5652; (b) C. Lee, W. Yang, R. G. Parr, *Phys. Rev. B* **1988**, *37*, 785–789.
5. (a) Ditchfield, R.; Hehre, W. J.; Pople, J. A. *J. Chem. Phys.* **1971**, *54*, 724-728. (b) Hariharan, P. C.; Pople, J. A. *Theor. Chim. Acta* **1973**, *28*, 213-222. (c) Hehre, W. J.; Ditchfield, R.; Pople, J. A. *J. Chem. Phys.* **1972**, *56*, 2257-2261.
6. Krishnan, R., Binkley, J. S., Seeger, R. & Pople, J. A. *J. Chem. Phys.* **1980**, *72*, 650-654.
7. He, T.; Peng, L.; Li, S.; Hu, F.; Xie, C.; Huang, S.; Jia, S.; Qin, W.; Yan, H. *Org. Lett.* **2020**, *22*, 6966–6971.
8. Love, B. E.; Raje, P. S. *Synlett.* **1994**, 493.
9. Schmidt, Y.; Breit, B. *Chem. Eur. J.* **2011**, *17*, 11789 – 11796.
